# Supplementary material for: Rapid restructurization of conformationally-distinct alpha-synuclein amyloid fibrils at an elevated temperature
Source: PeerJ. 2022 Sep 30;10:e14137. doi: 10.7717/peerj.14137 (PMC9528901; doi:10.7717/peerj.14137)
Supplement: Supplemental Information 1 [file peerj-10-14137-s001.xlsx]

## Sheet: Spectra
Wavelength (nm)	Type 1 0h	Type 1 24h	Type 1 48h	Type 2 0h	Type 2 24h	Type 2 48h	Type 3 0h	Type 3 24h	Type 3 48h	Type 4 0h	Type 4 24h	Type 4 48h
300	0.29036	0.43645	0.43278	0.34758	0.44625	0.40785	0.2993	0.42544	0.402	0.29219	0.4735	0.46206
301	0.28873	0.43559	0.4313	0.34629	0.44572	0.40651	0.29735	0.42437	0.40041	0.29035	0.47251	0.4603
302	0.2869	0.43434	0.42947	0.34462	0.44467	0.40515	0.29556	0.42349	0.39903	0.28877	0.4718	0.45825
303	0.28535	0.43342	0.42809	0.34303	0.44386	0.40386	0.29386	0.4228	0.3975	0.28713	0.47084	0.45695
304	0.28391	0.43256	0.4266	0.34173	0.44338	0.40244	0.29212	0.42204	0.39602	0.2857	0.47025	0.45553
305	0.2828	0.43171	0.4254	0.34062	0.44336	0.40184	0.29128	0.42182	0.39491	0.28451	0.46986	0.45435
306	0.28089	0.43001	0.42409	0.33865	0.44251	0.40085	0.28904	0.42164	0.39405	0.28421	0.47067	0.45251
307	0.28002	0.42985	0.42322	0.33743	0.44268	0.4	0.28784	0.42141	0.39346	0.28346	0.471	0.45161
308	0.27871	0.42925	0.42306	0.33654	0.44252	0.39954	0.28688	0.42144	0.39248	0.28237	0.47099	0.4508
309	0.27722	0.42854	0.4217	0.33499	0.44222	0.39859	0.28542	0.42106	0.39178	0.28052	0.47053	0.44983
310	0.27567	0.42755	0.42053	0.33341	0.44178	0.39737	0.28393	0.42069	0.39057	0.27866	0.46977	0.44894
311	0.27462	0.42735	0.41991	0.33249	0.44142	0.39637	0.28237	0.42047	0.38961	0.27757	0.46976	0.44834
312	0.27343	0.42676	0.41898	0.33073	0.44048	0.39536	0.28073	0.41993	0.3888	0.27612	0.46925	0.44778
313	0.27193	0.42584	0.41832	0.32909	0.44027	0.39489	0.27936	0.41942	0.38804	0.27438	0.46891	0.44644
314	0.27081	0.42512	0.41785	0.32777	0.43948	0.39344	0.27784	0.41891	0.38739	0.27299	0.46823	0.44582
315	0.26962	0.42454	0.41728	0.32624	0.4391	0.39306	0.27627	0.41864	0.38684	0.27185	0.46769	0.44529
316	0.26817	0.42374	0.41682	0.32505	0.43837	0.3919	0.27511	0.41802	0.38609	0.27052	0.46715	0.44472
317	0.26686	0.423	0.41619	0.3239	0.43797	0.39114	0.27378	0.418	0.38531	0.26879	0.46643	0.44425
318	0.26592	0.42184	0.41553	0.32215	0.4373	0.39043	0.27256	0.41718	0.38489	0.26738	0.46594	0.44352
319	0.26487	0.42091	0.41533	0.32069	0.43609	0.39009	0.27145	0.41676	0.3844	0.26569	0.46569	0.44295
320	0.26362	0.41989	0.41525	0.31959	0.43511	0.38896	0.2698	0.41646	0.38362	0.26443	0.46412	0.44307
321	0.26231	0.41858	0.41443	0.31801	0.43357	0.38837	0.2684	0.41548	0.38294	0.26284	0.46306	0.4422
322	0.26057	0.41684	0.41325	0.31631	0.43208	0.38701	0.26644	0.41419	0.38224	0.26091	0.46137	0.44113
323	0.25872	0.41453	0.41269	0.3142	0.4297	0.38543	0.26473	0.412	0.38106	0.25893	0.45907	0.43978
324	0.25681	0.41245	0.41108	0.31207	0.42742	0.38368	0.26255	0.41045	0.37964	0.25685	0.45655	0.43823
325	0.25412	0.40921	0.40922	0.30913	0.42419	0.38136	0.25978	0.40758	0.37737	0.25386	0.45288	0.43599
326	0.2517	0.40611	0.40735	0.30628	0.42084	0.37876	0.25718	0.40458	0.37524	0.25098	0.44994	0.43383
327	0.24942	0.4037	0.40557	0.30372	0.41774	0.37677	0.25461	0.40223	0.3735	0.24824	0.44675	0.4321
328	0.24706	0.39984	0.40335	0.30078	0.41411	0.37412	0.25161	0.39905	0.37141	0.24537	0.4433	0.42991
329	0.24522	0.3966	0.40201	0.29846	0.41095	0.3726	0.24973	0.39654	0.36987	0.24276	0.44016	0.42822
330	0.24319	0.39451	0.40084	0.29642	0.4087	0.37084	0.24774	0.39458	0.36868	0.24087	0.43731	0.42668
331	0.24098	0.39176	0.39945	0.29431	0.40583	0.36906	0.24571	0.39217	0.36734	0.23854	0.434	0.4249
332	0.23927	0.38957	0.39871	0.29203	0.40312	0.36774	0.24379	0.39041	0.36618	0.2363	0.43187	0.42357
333	0.23765	0.38684	0.3975	0.28981	0.40025	0.3659	0.242	0.38803	0.36479	0.23393	0.42925	0.42255
334	0.23603	0.38446	0.39661	0.28803	0.39746	0.36472	0.2402	0.38693	0.364	0.23208	0.42682	0.42151
335	0.23471	0.38258	0.39649	0.28612	0.39519	0.36351	0.23835	0.38487	0.3634	0.23036	0.42465	0.42057
336	0.23347	0.38068	0.39639	0.28481	0.39343	0.36267	0.23734	0.38323	0.3628	0.22871	0.42265	0.42068
337	0.23214	0.37847	0.39593	0.28361	0.39073	0.36164	0.23578	0.38156	0.36233	0.22696	0.42042	0.42009
338	0.23072	0.37699	0.39503	0.28203	0.38809	0.3605	0.23439	0.37996	0.36164	0.22521	0.41827	0.41928
339	0.22977	0.3749	0.39479	0.28104	0.38661	0.35974	0.23292	0.37817	0.36157	0.22399	0.41585	0.41881
340	0.22799	0.37266	0.39414	0.27982	0.38328	0.35849	0.23231	0.37629	0.36085	0.22238	0.41326	0.41763
341	0.22585	0.37014	0.39351	0.27936	0.38096	0.35774	0.23263	0.37486	0.36095	0.22177	0.41155	0.4175
342	0.22525	0.36851	0.3933	0.27813	0.37807	0.35711	0.23138	0.3727	0.36009	0.22018	0.40897	0.41675
343	0.22391	0.3666	0.39322	0.27681	0.37512	0.3564	0.22979	0.37016	0.35964	0.21898	0.40594	0.41587
344	0.22212	0.36308	0.39146	0.27497	0.37219	0.35489	0.22808	0.36739	0.35825	0.21764	0.40258	0.41366
345	0.22051	0.36099	0.39027	0.27373	0.36859	0.35354	0.22649	0.36402	0.35693	0.21549	0.39899	0.41212
346	0.21847	0.35797	0.38891	0.27275	0.36584	0.35221	0.22501	0.3603	0.3554	0.21423	0.39475	0.41062
347	0.21682	0.35511	0.38659	0.27112	0.36271	0.35076	0.2236	0.35678	0.35336	0.21306	0.39101	0.40834
348	0.21515	0.35234	0.38484	0.26982	0.35954	0.34956	0.22222	0.35304	0.35115	0.21158	0.38707	0.40629
349	0.21406	0.34951	0.38285	0.26882	0.35686	0.34804	0.22092	0.3499	0.34923	0.21068	0.38412	0.4035
350	0.21284	0.34721	0.38053	0.26826	0.35323	0.34625	0.21969	0.34632	0.34771	0.21022	0.38017	0.40101
351	0.21133	0.34379	0.3786	0.26719	0.35033	0.34468	0.21843	0.34253	0.34542	0.20898	0.3765	0.3989
352	0.21036	0.34185	0.37652	0.26639	0.34784	0.3433	0.21807	0.33953	0.34323	0.20806	0.3736	0.39709
353	0.20888	0.33919	0.37495	0.26538	0.34528	0.34182	0.21665	0.33677	0.34101	0.20733	0.36996	0.39378
354	0.20805	0.33746	0.37288	0.26496	0.34282	0.34018	0.21601	0.33434	0.33944	0.20675	0.36756	0.39187
355	0.2071	0.33527	0.37162	0.2642	0.34111	0.33933	0.21524	0.33194	0.33801	0.20586	0.36479	0.38991
356	0.20658	0.33364	0.37065	0.2639	0.33953	0.33816	0.21507	0.32969	0.33654	0.20532	0.36235	0.38819
357	0.20673	0.33216	0.36942	0.26375	0.3384	0.33763	0.21498	0.32859	0.33604	0.20564	0.36098	0.38712
358	0.20621	0.33073	0.3684	0.26362	0.33735	0.33696	0.21457	0.32646	0.33468	0.20598	0.35938	0.3863
359	0.20533	0.3292	0.36739	0.26378	0.33636	0.33665	0.21457	0.32506	0.33378	0.20604	0.35761	0.38488
360	0.20571	0.32849	0.36688	0.26386	0.33566	0.33619	0.21488	0.32444	0.33378	0.20593	0.35614	0.38358
361	0.20592	0.32728	0.36639	0.26436	0.33524	0.3359	0.21517	0.32325	0.3329	0.20587	0.35521	0.38301
362	0.20607	0.32689	0.36584	0.2646	0.33499	0.33596	0.21511	0.32231	0.3331	0.20632	0.35411	0.38259
363	0.20646	0.32676	0.36564	0.26537	0.33494	0.3361	0.2161	0.32187	0.33351	0.20714	0.35377	0.3821
364	0.20694	0.3262	0.36522	0.2662	0.33456	0.33654	0.21644	0.32071	0.33318	0.20771	0.3531	0.38132
365	0.20679	0.32559	0.36483	0.26584	0.33401	0.33681	0.21682	0.32089	0.33294	0.20781	0.353	0.38124
366	0.20699	0.3252	0.36525	0.26649	0.33398	0.33693	0.21726	0.32021	0.33305	0.20851	0.35195	0.38073
367	0.20819	0.32575	0.36538	0.26754	0.33478	0.33765	0.2187	0.32067	0.33354	0.20935	0.35207	0.38088
368	0.20868	0.3257	0.36536	0.26786	0.33517	0.33737	0.2194	0.32056	0.3333	0.21031	0.35203	0.38107
369	0.20979	0.32592	0.36544	0.26937	0.33604	0.33875	0.22049	0.3209	0.33395	0.21205	0.35269	0.38174
370	0.21065	0.32651	0.3658	0.27103	0.33698	0.33926	0.22198	0.32111	0.33439	0.21265	0.35296	0.38212
371	0.2121	0.32649	0.36643	0.27183	0.33771	0.3402	0.22315	0.32141	0.33559	0.21417	0.35338	0.38224
372	0.21376	0.32754	0.36747	0.27351	0.33854	0.34136	0.22488	0.32275	0.33633	0.21571	0.35464	0.38307
373	0.21524	0.32898	0.36857	0.27523	0.34041	0.34282	0.22672	0.32411	0.33757	0.21763	0.35555	0.38404
374	0.21673	0.32956	0.36945	0.27686	0.34137	0.3442	0.22843	0.32544	0.33872	0.21923	0.35688	0.38545
375	0.2179	0.33068	0.37028	0.27864	0.34289	0.3451	0.23029	0.32613	0.33996	0.22126	0.35826	0.3858
376	0.21953	0.33259	0.3715	0.28068	0.34425	0.34685	0.2322	0.32781	0.34134	0.22281	0.3601	0.38766
377	0.22207	0.33371	0.37285	0.28257	0.34601	0.34836	0.23454	0.32931	0.34271	0.22517	0.3616	0.38887
378	0.22396	0.33519	0.37428	0.28485	0.34847	0.35046	0.23689	0.33126	0.34467	0.22717	0.36359	0.39071
379	0.22641	0.33712	0.3763	0.2881	0.35063	0.35208	0.23928	0.33285	0.34639	0.2299	0.36591	0.39275
380	0.2287	0.33916	0.37816	0.29028	0.35299	0.3543	0.24235	0.33494	0.34837	0.23304	0.3682	0.39476
381	0.23126	0.34111	0.37971	0.29311	0.35536	0.35679	0.24534	0.33716	0.35069	0.23582	0.37065	0.39676
382	0.23379	0.34333	0.38163	0.29532	0.35792	0.35857	0.24779	0.33944	0.35242	0.23846	0.37301	0.39858
383	0.23639	0.34588	0.38364	0.29873	0.36059	0.36121	0.25117	0.34193	0.35503	0.24155	0.37595	0.40109
384	0.23952	0.34835	0.38632	0.30171	0.36378	0.36385	0.2546	0.34515	0.35753	0.24531	0.37925	0.40402
385	0.24269	0.35119	0.38872	0.30499	0.36706	0.36667	0.25831	0.34817	0.36019	0.24859	0.38247	0.4064
386	0.24605	0.35423	0.39129	0.30865	0.37053	0.3696	0.26175	0.35129	0.36322	0.25223	0.38595	0.40955
387	0.24941	0.35695	0.39391	0.31216	0.37369	0.37275	0.26564	0.35463	0.36604	0.25589	0.38953	0.41227
388	0.2531	0.36041	0.39697	0.31614	0.37723	0.37569	0.26959	0.358	0.36887	0.2594	0.39329	0.41547
389	0.25688	0.36439	0.40061	0.32005	0.38132	0.37959	0.27406	0.36118	0.37232	0.26355	0.39697	0.41928
390	0.2608	0.3679	0.40384	0.32447	0.38543	0.3831	0.27872	0.36523	0.37634	0.26853	0.40164	0.4232
391	0.26497	0.37179	0.40674	0.32889	0.39004	0.38659	0.28342	0.36959	0.37963	0.27261	0.40625	0.42699
392	0.2692	0.3754	0.41038	0.33313	0.39409	0.39055	0.28837	0.37383	0.38381	0.27723	0.41079	0.43107
393	0.27381	0.37956	0.41412	0.33782	0.3983	0.39448	0.29271	0.3784	0.38764	0.28212	0.41593	0.43534
394	0.27825	0.38485	0.41823	0.34297	0.40407	0.39895	0.29845	0.38322	0.39221	0.28762	0.42115	0.44033
395	0.28354	0.38947	0.42308	0.34841	0.4093	0.40352	0.3042	0.38772	0.39642	0.29288	0.42624	0.44562
396	0.28885	0.39448	0.42755	0.35401	0.41514	0.40837	0.31021	0.39318	0.40125	0.29862	0.43289	0.45041
397	0.29418	0.39992	0.43243	0.35955	0.42065	0.41317	0.31598	0.39883	0.406	0.30487	0.43846	0.45556
398	0.29941	0.40474	0.43682	0.36485	0.42587	0.41792	0.32207	0.40425	0.41074	0.31043	0.44416	0.46103
399	0.30528	0.41065	0.44196	0.37062	0.43224	0.42355	0.32811	0.41048	0.41624	0.31643	0.45093	0.46661
400	0.31092	0.4161	0.44698	0.37682	0.43833	0.42881	0.33485	0.41662	0.42171	0.32314	0.45748	0.47242
401	0.3168	0.42198	0.45245	0.38318	0.44424	0.43407	0.34074	0.42292	0.4273	0.3294	0.46404	0.47849
402	0.32344	0.42825	0.45806	0.38992	0.45128	0.43981	0.34776	0.42866	0.43296	0.33565	0.47108	0.48515
403	0.32937	0.43398	0.46375	0.39637	0.45801	0.44566	0.35405	0.43512	0.43863	0.34256	0.4777	0.49123
404	0.33611	0.44077	0.46948	0.40316	0.4654	0.45213	0.36083	0.4419	0.44504	0.34958	0.48582	0.49798
405	0.34242	0.44727	0.4755	0.41009	0.47227	0.45785	0.3674	0.44858	0.45096	0.35645	0.49289	0.50469
406	0.34916	0.45418	0.48132	0.41736	0.47929	0.46412	0.37482	0.45538	0.45698	0.36338	0.50089	0.51148
407	0.35572	0.46071	0.4871	0.42371	0.48604	0.4701	0.38133	0.46239	0.46317	0.37024	0.50845	0.51842
408	0.36271	0.46757	0.49364	0.43079	0.49417	0.47676	0.38851	0.46958	0.46971	0.37803	0.51621	0.52547
409	0.36946	0.47452	0.49973	0.4377	0.50105	0.48285	0.39489	0.47641	0.47564	0.38557	0.52394	0.53272
410	0.37657	0.4819	0.50645	0.44487	0.50883	0.4897	0.40229	0.48372	0.48226	0.39286	0.53219	0.53981
411	0.38358	0.48871	0.51281	0.45215	0.51646	0.49593	0.40923	0.49083	0.48896	0.40042	0.54027	0.54755
412	0.39095	0.49613	0.51985	0.4601	0.52445	0.50294	0.41664	0.49801	0.49546	0.40812	0.54881	0.55536
413	0.39799	0.50289	0.52627	0.46754	0.53232	0.50937	0.42331	0.50565	0.50236	0.41572	0.55724	0.56314
414	0.40502	0.5103	0.53266	0.4748	0.53975	0.51621	0.4299	0.51276	0.50861	0.42286	0.56503	0.57052
415	0.41241	0.51738	0.5385	0.48195	0.54716	0.52285	0.43663	0.51977	0.51568	0.4303	0.57343	0.57824
416	0.41879	0.52392	0.54466	0.48862	0.55405	0.52884	0.44284	0.52662	0.52141	0.43722	0.58089	0.58502
417	0.42546	0.53099	0.55108	0.49526	0.56211	0.53538	0.44951	0.5334	0.52813	0.44478	0.58906	0.5927
418	0.43256	0.53803	0.55778	0.50276	0.56909	0.54184	0.45614	0.54082	0.53425	0.45189	0.59718	0.60048
419	0.43995	0.54545	0.56454	0.51042	0.57759	0.5488	0.4629	0.54818	0.54115	0.45986	0.60569	0.60811
420	0.44677	0.55284	0.57066	0.51766	0.58538	0.55501	0.46937	0.55534	0.54793	0.46712	0.61375	0.61568
421	0.45311	0.5595	0.57681	0.52395	0.59292	0.56174	0.47544	0.56201	0.554	0.4745	0.62166	0.62303
422	0.45998	0.5661	0.5829	0.53117	0.59994	0.56785	0.48131	0.56855	0.55993	0.48096	0.62889	0.63022
423	0.46632	0.57248	0.58854	0.5375	0.60663	0.57402	0.48725	0.5748	0.56614	0.48767	0.63604	0.63703
424	0.47224	0.57861	0.59408	0.54404	0.61357	0.57941	0.49304	0.581	0.57184	0.49429	0.64313	0.64394
425	0.47824	0.58485	0.59989	0.55097	0.62051	0.58553	0.49886	0.58734	0.57752	0.50096	0.65049	0.6508
426	0.48418	0.59085	0.60552	0.55703	0.6269	0.59089	0.50438	0.59339	0.58307	0.50687	0.65749	0.65746
427	0.48988	0.59675	0.61057	0.56258	0.63299	0.5963	0.50956	0.59937	0.58807	0.51297	0.6638	0.66322
428	0.49543	0.60183	0.6153	0.56832	0.639	0.60147	0.51476	0.60492	0.5932	0.51852	0.66969	0.66928
429	0.50063	0.60712	0.61988	0.57391	0.64448	0.60629	0.51952	0.61036	0.59839	0.52418	0.67575	0.67519
430	0.50517	0.61201	0.62418	0.57914	0.64961	0.611	0.52382	0.61509	0.60289	0.52912	0.68141	0.68032
431	0.5096	0.61631	0.62801	0.58383	0.65455	0.61542	0.52804	0.61946	0.6072	0.53373	0.68666	0.6855
432	0.51421	0.62062	0.63221	0.58878	0.65938	0.61952	0.53213	0.62423	0.61104	0.53819	0.69164	0.6901
433	0.51793	0.62443	0.6356	0.59314	0.66374	0.62325	0.53591	0.62777	0.61464	0.54254	0.69569	0.69437
434	0.52158	0.6276	0.63864	0.59702	0.6678	0.62665	0.53958	0.63127	0.61784	0.54632	0.6998	0.69826
435	0.525	0.63106	0.64166	0.60063	0.67175	0.62992	0.54285	0.63486	0.62114	0.55004	0.7035	0.70189
436	0.52805	0.6338	0.64401	0.6041	0.67523	0.63263	0.54588	0.63776	0.62384	0.55303	0.7067	0.70508
437	0.53052	0.63618	0.64603	0.60731	0.67828	0.63518	0.5485	0.64087	0.62633	0.55562	0.70966	0.70792
438	0.53227	0.63787	0.64752	0.60975	0.68066	0.63737	0.55055	0.64314	0.6285	0.55795	0.71173	0.70998
439	0.53351	0.63912	0.64868	0.61192	0.68217	0.639	0.55241	0.64507	0.63043	0.55964	0.71315	0.71187
440	0.53451	0.63963	0.64906	0.61341	0.68351	0.64019	0.55388	0.64629	0.63164	0.56082	0.71395	0.71285
441	0.53477	0.6397	0.64895	0.61466	0.68395	0.64054	0.55502	0.64725	0.63224	0.56152	0.71407	0.71311
442	0.53448	0.63906	0.64844	0.6151	0.68365	0.64041	0.55545	0.64736	0.63227	0.56118	0.71363	0.71263
443	0.53326	0.63753	0.64687	0.61474	0.68296	0.63956	0.55529	0.64705	0.63182	0.5601	0.71224	0.71141
444	0.53124	0.63515	0.64424	0.61376	0.68119	0.63788	0.5543	0.64559	0.63064	0.55833	0.70983	0.70917
445	0.52799	0.63195	0.64066	0.61172	0.67822	0.63542	0.55242	0.64331	0.62849	0.55543	0.70609	0.70596
446	0.52422	0.62742	0.63634	0.60862	0.67418	0.63213	0.5501	0.64018	0.6255	0.5518	0.70148	0.7015
447	0.51925	0.62166	0.63113	0.60471	0.66913	0.62755	0.54689	0.63605	0.62161	0.54706	0.69544	0.69602
448	0.51336	0.61506	0.6249	0.59987	0.663	0.62228	0.54272	0.63079	0.61679	0.54134	0.68833	0.68968
449	0.50668	0.60786	0.61792	0.59411	0.65626	0.61636	0.53801	0.62488	0.61123	0.53481	0.68048	0.68222
450	0.49875	0.59938	0.60972	0.58725	0.64774	0.60891	0.53195	0.61788	0.60444	0.52708	0.67112	0.67324
451	0.48888	0.58892	0.59978	0.5786	0.6374	0.59976	0.5243	0.60875	0.59601	0.51747	0.65974	0.6625
452	0.47837	0.57781	0.58911	0.56929	0.6264	0.58996	0.51591	0.59888	0.58675	0.50706	0.64762	0.65115
453	0.46666	0.56525	0.57697	0.55857	0.61379	0.57896	0.50598	0.58755	0.57613	0.49536	0.63357	0.63796
454	0.45342	0.5514	0.56386	0.54645	0.59979	0.56669	0.49506	0.5749	0.56424	0.48241	0.61814	0.62347
455	0.43984	0.53694	0.55028	0.53369	0.58532	0.55378	0.48341	0.56154	0.5517	0.4688	0.60212	0.60832
456	0.42505	0.52106	0.53555	0.51969	0.56904	0.53967	0.47008	0.54652	0.53776	0.45398	0.58435	0.59151
457	0.41066	0.50528	0.52101	0.50554	0.55293	0.52581	0.45676	0.53136	0.52391	0.43927	0.56706	0.57498
458	0.39444	0.48794	0.5048	0.48966	0.53493	0.51036	0.44158	0.51426	0.50813	0.42259	0.54773	0.55673
459	0.37846	0.4709	0.48895	0.47387	0.51706	0.49452	0.42602	0.49705	0.49218	0.40611	0.52848	0.53859
460	0.36158	0.45301	0.47201	0.45683	0.49842	0.47797	0.40932	0.47879	0.47527	0.38851	0.50828	0.51957
461	0.34413	0.43469	0.4547	0.43905	0.47882	0.46114	0.39161	0.45942	0.45773	0.37011	0.48716	0.49994
462	0.32756	0.41716	0.43823	0.42203	0.46012	0.44503	0.37413	0.44058	0.44037	0.35257	0.46703	0.48091
463	0.31104	0.39966	0.42188	0.40495	0.44145	0.42878	0.35626	0.4214	0.42282	0.33499	0.44681	0.46191
464	0.29507	0.38267	0.40612	0.38814	0.42339	0.41313	0.33852	0.40257	0.40569	0.31799	0.42724	0.44349
465	0.2803	0.36685	0.39166	0.37243	0.40646	0.39857	0.32169	0.38477	0.38975	0.30218	0.40876	0.42627
466	0.26625	0.35177	0.37776	0.35738	0.39018	0.3845	0.30545	0.36785	0.3742	0.28709	0.39109	0.40978
467	0.25254	0.33717	0.36424	0.34251	0.37422	0.37074	0.28939	0.35113	0.35897	0.27219	0.37382	0.39373
468	0.23962	0.32346	0.35158	0.32852	0.35936	0.3578	0.27403	0.33546	0.34471	0.25804	0.35761	0.37855
469	0.22754	0.31065	0.3398	0.31525	0.34524	0.34564	0.25963	0.32048	0.33135	0.24468	0.34249	0.36439
470	0.21645	0.29891	0.32898	0.30313	0.33245	0.33465	0.24645	0.30694	0.31916	0.23238	0.32853	0.35157
471	0.20656	0.28848	0.31923	0.29199	0.3209	0.32467	0.23454	0.29487	0.30818	0.2213	0.31599	0.33987
472	0.19768	0.27902	0.31047	0.28211	0.31043	0.31571	0.22388	0.28418	0.29831	0.21153	0.30452	0.32933
473	0.18997	0.27065	0.30296	0.27343	0.30141	0.30801	0.21447	0.27457	0.2898	0.20297	0.29452	0.32017
474	0.183	0.26309	0.29598	0.26554	0.29308	0.30107	0.20599	0.26595	0.28198	0.19519	0.28556	0.31177
475	0.1764	0.25602	0.28953	0.25814	0.28535	0.29445	0.19815	0.25794	0.27483	0.18796	0.27718	0.30404
476	0.17091	0.24994	0.28399	0.25189	0.27873	0.28857	0.19145	0.25117	0.26862	0.18176	0.27001	0.29744
477	0.16612	0.24475	0.27912	0.24634	0.27307	0.28364	0.18564	0.24537	0.26337	0.17638	0.26373	0.29172
478	0.16159	0.24007	0.27456	0.24123	0.26779	0.27911	0.18035	0.23998	0.25849	0.17133	0.25795	0.28639
479	0.1578	0.23592	0.27065	0.23701	0.26326	0.27531	0.17587	0.2353	0.25432	0.16712	0.25298	0.28163
480	0.15451	0.23239	0.26738	0.2333	0.25942	0.27215	0.17207	0.23144	0.25079	0.16362	0.2487	0.27769
481	0.15155	0.22911	0.26438	0.22995	0.25583	0.26903	0.16862	0.22789	0.24742	0.16029	0.24479	0.27402
482	0.14908	0.22614	0.26169	0.22706	0.25281	0.26644	0.1657	0.22486	0.24465	0.15757	0.24136	0.27087
483	0.1469	0.22353	0.25925	0.22449	0.24993	0.26401	0.16304	0.22208	0.24217	0.15512	0.23827	0.26813
484	0.14499	0.2213	0.25727	0.22229	0.24772	0.26197	0.16089	0.21976	0.24006	0.15307	0.23574	0.26569
485	0.14336	0.21929	0.25548	0.22038	0.2457	0.26021	0.15895	0.21768	0.23808	0.1512	0.2334	0.2635
486	0.14187	0.21755	0.25381	0.21863	0.24378	0.25861	0.15716	0.21573	0.23636	0.14955	0.23132	0.2615
487	0.14061	0.21605	0.25232	0.21716	0.24217	0.25725	0.15579	0.2142	0.23502	0.14816	0.22975	0.25988
488	0.13933	0.21456	0.25087	0.21582	0.24055	0.2557	0.1544	0.21267	0.23355	0.14686	0.228	0.25823
489	0.13834	0.21322	0.24959	0.21454	0.23916	0.25457	0.15322	0.21129	0.23223	0.14577	0.22645	0.25677
490	0.13739	0.21206	0.24844	0.21346	0.23803	0.25345	0.15211	0.21002	0.23113	0.14482	0.22512	0.25539
491	0.13655	0.21102	0.24736	0.2124	0.23688	0.25248	0.15122	0.20895	0.23015	0.14391	0.22384	0.25419
492	0.13576	0.21002	0.24643	0.21161	0.23579	0.25159	0.15037	0.20795	0.22915	0.14306	0.22268	0.25303
493	0.13501	0.20905	0.24546	0.21075	0.23486	0.25068	0.14956	0.20702	0.2282	0.14231	0.22159	0.25199
494	0.13435	0.20811	0.24457	0.20992	0.23383	0.24981	0.14878	0.206	0.22736	0.14155	0.22056	0.251
495	0.1336	0.20726	0.24362	0.20924	0.23298	0.249	0.14803	0.20509	0.2265	0.14083	0.21956	0.24995
496	0.13307	0.20647	0.24282	0.20864	0.23221	0.24836	0.14737	0.20439	0.22571	0.14024	0.2187	0.2491
497	0.13248	0.20572	0.24199	0.20793	0.23138	0.24759	0.14672	0.20359	0.22486	0.13966	0.21781	0.24818
498	0.13193	0.20503	0.24122	0.20734	0.23058	0.24688	0.14613	0.20289	0.22416	0.13916	0.21701	0.24734
499	0.13147	0.20434	0.24057	0.20672	0.22993	0.24623	0.14572	0.20227	0.22362	0.13873	0.21631	0.24659
500	0.13096	0.20364	0.2399	0.20615	0.22921	0.24554	0.14522	0.20153	0.22289	0.13818	0.21546	0.24582
501	0.13049	0.20299	0.23918	0.20556	0.22843	0.24496	0.14473	0.20085	0.22227	0.13764	0.21477	0.24494
502	0.13009	0.20244	0.23851	0.20523	0.22788	0.24439	0.14422	0.20028	0.22171	0.13722	0.21414	0.24426
503	0.12966	0.20171	0.23782	0.20476	0.22725	0.24385	0.14385	0.19964	0.22114	0.13685	0.21337	0.24359
504	0.12926	0.20116	0.23723	0.20444	0.22665	0.24339	0.14341	0.19911	0.22063	0.13652	0.21275	0.24293
505	0.12892	0.20058	0.23669	0.20402	0.22613	0.24271	0.14304	0.19853	0.22004	0.13615	0.21216	0.24223
506	0.12848	0.19996	0.23601	0.20351	0.22553	0.24213	0.14258	0.19798	0.21945	0.13566	0.21152	0.24156
507	0.12811	0.19938	0.2354	0.20306	0.22491	0.2416	0.14211	0.19739	0.21884	0.13516	0.21082	0.24086
508	0.12781	0.19886	0.23483	0.20263	0.22438	0.24103	0.1418	0.19678	0.21819	0.13489	0.21024	0.24021
509	0.12737	0.19828	0.23416	0.20216	0.22382	0.24049	0.14132	0.19628	0.2176	0.13452	0.20962	0.23961
510	0.12697	0.19763	0.23345	0.20164	0.22318	0.23987	0.14082	0.19573	0.21705	0.13416	0.20902	0.23887
511	0.12668	0.19711	0.23291	0.20126	0.22266	0.23935	0.14058	0.19526	0.21657	0.13377	0.20846	0.23826
512	0.12633	0.19665	0.23245	0.20103	0.2222	0.23887	0.14035	0.19486	0.21605	0.13344	0.20797	0.2377
513	0.12606	0.19629	0.23199	0.20074	0.22187	0.23845	0.14011	0.19442	0.21568	0.13326	0.20759	0.23724
514	0.1258	0.19584	0.23133	0.20041	0.22131	0.23803	0.13963	0.19395	0.21533	0.13305	0.20703	0.23662
515	0.12544	0.19534	0.23084	0.20013	0.22086	0.23753	0.13928	0.19344	0.2148	0.13276	0.2064	0.23607
516	0.1251	0.19491	0.23037	0.1998	0.22043	0.23713	0.13896	0.19299	0.21439	0.13245	0.20589	0.23554
517	0.12482	0.19437	0.22974	0.1994	0.21987	0.23665	0.13874	0.19251	0.21385	0.1321	0.20527	0.23495
518	0.12445	0.19391	0.22915	0.19908	0.21923	0.23615	0.13834	0.19197	0.21328	0.13172	0.2047	0.23427
519	0.12418	0.19336	0.22865	0.19877	0.21874	0.23569	0.13807	0.19152	0.21287	0.13153	0.20424	0.23372
520	0.12388	0.19289	0.22817	0.1985	0.21836	0.23524	0.13782	0.19108	0.21241	0.13126	0.20379	0.23324
521	0.12364	0.19243	0.22759	0.19814	0.2179	0.23478	0.13742	0.19059	0.21193	0.13091	0.20327	0.23272
522	0.12333	0.19198	0.2271	0.19773	0.21744	0.23431	0.13719	0.1902	0.21138	0.13069	0.20276	0.23209
523	0.12304	0.19148	0.22644	0.1974	0.21692	0.23385	0.13683	0.18966	0.21087	0.13024	0.20221	0.23152
524	0.12285	0.19107	0.22602	0.19714	0.21655	0.23342	0.1366	0.18932	0.21049	0.13017	0.20181	0.23101
525	0.12254	0.19064	0.22563	0.19688	0.21623	0.23307	0.13639	0.18894	0.2101	0.12992	0.20134	0.23053
526	0.12231	0.19025	0.22515	0.19669	0.21579	0.23266	0.13615	0.18864	0.20968	0.12967	0.20098	0.23011
527	0.12206	0.18975	0.2246	0.19631	0.21528	0.23219	0.1358	0.18811	0.20924	0.12934	0.20041	0.22948
528	0.1218	0.18931	0.22406	0.19603	0.21483	0.23174	0.13542	0.18757	0.20879	0.12905	0.1999	0.22893
529	0.12159	0.18893	0.22365	0.19581	0.21455	0.23134	0.13527	0.18726	0.20837	0.12874	0.19947	0.2285
530	0.1213	0.18849	0.22317	0.19551	0.21401	0.23099	0.13492	0.1869	0.20797	0.12839	0.19891	0.22799
531	0.12102	0.18804	0.22261	0.19524	0.21361	0.23058	0.13464	0.18636	0.20748	0.12814	0.19846	0.22745
532	0.12071	0.18764	0.22215	0.19492	0.21313	0.23011	0.13437	0.18586	0.20699	0.12794	0.19804	0.22691
533	0.12041	0.18712	0.22163	0.19459	0.2126	0.22967	0.13398	0.1854	0.20645	0.1276	0.19746	0.22635
534	0.12016	0.18666	0.22116	0.19429	0.21229	0.22919	0.13362	0.18507	0.20608	0.12729	0.19698	0.22588
535	0.11996	0.18635	0.22067	0.19408	0.21192	0.22886	0.13342	0.18464	0.20565	0.12704	0.19651	0.22532
536	0.11959	0.18582	0.22014	0.1936	0.21136	0.22835	0.13307	0.18411	0.20516	0.12684	0.1962	0.22468
537	0.11932	0.1853	0.21964	0.19306	0.21077	0.22785	0.13273	0.18363	0.20467	0.12659	0.1958	0.22406
538	0.11906	0.18483	0.21904	0.19269	0.21026	0.22742	0.13235	0.18319	0.20421	0.12622	0.19522	0.22345
539	0.11887	0.18444	0.21862	0.19255	0.20994	0.22709	0.13217	0.18274	0.20383	0.12598	0.19483	0.22299
540	0.11855	0.18405	0.21814	0.19229	0.20951	0.22662	0.13194	0.18232	0.20329	0.1257	0.19446	0.22246
541	0.11839	0.18372	0.21767	0.19211	0.20917	0.2263	0.13164	0.18205	0.20293	0.12551	0.19407	0.22194
542	0.11804	0.18325	0.21714	0.19182	0.20866	0.22585	0.13133	0.18155	0.20232	0.12523	0.19351	0.22137
543	0.11784	0.18287	0.21678	0.19161	0.20829	0.2255	0.13107	0.18117	0.20194	0.12509	0.19307	0.22092
544	0.11755	0.18245	0.21629	0.19132	0.20789	0.22498	0.13087	0.18071	0.20157	0.12483	0.19271	0.22039
545	0.11732	0.18197	0.21568	0.19099	0.20749	0.22456	0.13055	0.18021	0.20109	0.12454	0.1922	0.21991
546	0.11708	0.18164	0.21523	0.19078	0.2071	0.2242	0.13034	0.17991	0.20068	0.12434	0.19181	0.2194
547	0.11691	0.18122	0.21483	0.19055	0.20663	0.22376	0.13008	0.17957	0.20034	0.12407	0.19145	0.21899
548	0.11662	0.18082	0.21443	0.19029	0.2063	0.22343	0.12989	0.1792	0.19993	0.12383	0.19093	0.21848
549	0.11646	0.18044	0.21399	0.19003	0.20605	0.22306	0.12964	0.17885	0.19954	0.12366	0.19049	0.21803
550	0.11628	0.18005	0.21365	0.18991	0.20567	0.22265	0.12932	0.17851	0.19916	0.1235	0.19011	0.21762

## Sheet: OD600
	Incubation time	Type 1	Error	Type 2	Error	Type 3	Error	Type 4	Error
	0h	0.10743	0.00571	0.18104	0.00626	0.11889	0.00694	0.11376	0.00696
	24h	0.1641	0.00558	0.1905	0.00463	0.16279	0.005	0.17236	0.00698
	48h	0.19644	0.0048	0.20926	0.00437	0.18251	0.00513	0.19924	0.00545
