# Supplementary material for: Rapid restructurization of conformationally-distinct alpha-synuclein amyloid fibrils at an elevated temperature
Source: PeerJ. 2022 Sep 30;10:e14137. doi: 10.7717/peerj.14137 (PMC9528901; doi:10.7717/peerj.14137)
Supplement: Supplemental Information 2 [file peerj-10-14137-s002.xlsx]

## Sheet: Sheet1
Type 1 fibrils															Type 2 fibrils															Type 3 fibrils															Type 4 fibrils
Wavelength (nm)	0h	1h	2h	3h	4h	5h	6h	7h	8h	9h	10h	24h	48h		Wavelength (nm)	0h	1h	2h	3h	4h	5h	6h	7h	8h	9h	10h	24h	48h		Wavelength (nm)	0h	1h	2h	3h	4h	5h	6h	7h	8h	9h	10h	24h	48h		Wavelength (nm)	0h	1h	2h	3h
200	-0.127782	1.524	0.821751	0.605372	3.10517	2.3998	3.17117	4.51055	2.71938	4.63861	5.14896	1.73787	4.65551		200	-0.510362	-0.418986	0.263618	-0.237421	2.13245	0.509466	0.557183	1.3259	1.28762	1.16109	0.268046	2.24937	1.5148		200	0.144568	-0.335591	-0.60656	-0.64804	-0.0875194	1.07093	2.02729	-0.328283	0.300692	0.540183	0.96847	2.97633	4.1891		200	0.544131	0.396749	0.278284	0.280004
201	-0.262857	1.25038	0.677974	0.412783	2.72294	2.15885	2.86162	4.16106	2.33695	4.19521	4.72898	1.47754	4.22941		201	-0.607871	-0.502429	0.0928084	-0.254235	1.90284	0.287946	0.484175	1.08675	1.02358	0.969272	0.135605	1.9204	1.26691		201	0.0737031	-0.440661	-0.50595	-0.521209	-0.129921	0.960149	1.87837	-0.338147	0.209499	0.353799	0.857775	2.70535	3.75206		201	0.429989	0.314725	0.121361	0.1371
202	-0.412993	1.16339	0.602535	0.388907	2.58192	2.03316	2.69147	3.90086	2.04597	3.97932	4.38322	1.16364	3.89246		202	-0.608423	-0.541015	0.0804565	-0.209595	1.7374	0.156806	0.452476	0.880516	0.890872	0.840966	-0.00821914	1.65013	0.977435		202	0.291783	-0.461043	-0.440608	-0.495008	-0.155363	1.03096	1.80863	-0.33541	0.203357	0.102094	0.824824	2.47856	3.38922		202	0.266535	0.210093	0.141904	0.0848398
203	-0.589076	0.917653	0.376492	0.255156	2.36177	1.79843	2.4916	3.55882	1.67453	3.60795	4.11011	0.897647	3.40442		203	-0.548497	-0.478456	0.0335003	-0.211295	1.53867	-0.0416836	0.214457	0.732895	0.630854	0.666748	-0.178543	1.34143	0.637141		203	0.310465	-0.5371	-0.47437	-0.455565	-0.168607	0.941954	1.78974	-0.427897	0.0568345	-0.0287349	0.619491	2.10594	2.92792		203	0.0722372	0.0563409	0.0379371	-0.0463322
204	-0.686898	0.78597	0.252299	0.0797065	2.20066	1.56713	2.29636	3.28475	1.48218	3.32134	3.7407	0.568876	2.97987		204	-0.476535	-0.534236	-0.0381644	-0.19167	1.2527	-0.0613589	0.134037	0.587912	0.448374	0.444891	-0.401268	1.01501	0.34856		204	0.406813	-0.412149	-0.502378	-0.466345	-0.146245	0.858269	1.67487	-0.414648	0.038327	-0.0567792	0.466204	1.74845	2.4936		204	-0.00378809	0.0266917	0.100707	-0.181878
205	-0.819805	0.54409	0.0678412	-0.201825	1.82702	1.38848	2.06693	3.01366	1.2188	2.94261	3.53711	0.236757	2.6033		205	-0.458716	-0.427317	-0.205889	-0.279527	1.1397	-0.166229	0.00954809	0.496824	0.242333	0.165316	-0.627752	0.720395	0.131393		205	0.3538	-0.338292	-0.477367	-0.443144	-0.213613	0.70156	1.58501	-0.604559	-0.131851	-0.176775	0.201437	1.36002	1.95562		205	-0.0816476	-0.0293262	0.0166506	-0.326574
206	-0.999243	0.419165	-0.0982224	-0.435454	1.35392	1.09142	1.65634	2.5664	0.95555	2.49183	3.00227	-0.202357	2.10668		206	-0.532126	-0.515483	-0.356151	-0.471448	0.930838	-0.367465	-0.21769	0.29397	-0.0175972	-0.127104	-0.8507	0.322536	-0.16901		206	0.338074	-0.269412	-0.551516	-0.551686	-0.385144	0.527585	1.23088	-0.839396	-0.31236	-0.414037	-0.0876526	0.917684	1.37169		206	-0.234975	-0.147712	-0.0932658	-0.477199
207	-1.24287	0.188805	-0.377039	-0.617641	0.942328	0.774729	1.34279	2.15479	0.588619	2.07294	2.77499	-0.50035	1.75112		207	-0.642173	-0.50366	-0.486949	-0.723386	0.933778	-0.653317	-0.54848	0.112744	-0.278409	-0.413733	-1.07645	0.0458256	-0.534245		207	0.206382	-0.469973	-0.68324	-0.758387	-0.608379	0.210558	1.05577	-1.19926	-0.6447	-0.664797	-0.417772	0.39825	0.824109		207	-0.340736	-0.332691	-0.3981	-0.658827
208	-1.49234	0.0850567	-0.597308	-0.773428	0.596369	0.422822	0.953173	1.68596	0.243757	1.66945	2.29553	-0.838951	1.25343		208	-0.723549	-0.701346	-0.562061	-0.901952	0.675261	-0.898561	-0.730692	-0.201713	-0.581482	-0.669901	-1.20891	-0.353488	-0.878875		208	0.0448329	-0.620222	-0.823038	-0.991819	-0.795349	-0.138329	0.706587	-1.37119	-0.876587	-0.913521	-0.669504	-0.172167	0.339551		208	-0.409479	-0.463339	-0.592153	-0.825
209	-1.69129	-0.110638	-0.829363	-0.93173	0.356153	0.176645	0.747117	1.41767	-0.0728151	1.40376	2.16818	-1.08496	1.08051		209	-0.743292	-0.675594	-0.65412	-0.982178	0.599842	-1.0524	-0.858348	-0.431717	-0.801022	-0.906509	-1.39106	-0.561667	-1.12198		209	-0.11592	-0.804159	-0.868189	-1.22461	-0.95626	-0.418942	0.568584	-1.59968	-1.10477	-1.15628	-0.848154	-0.733504	-0.0215114		209	-0.463744	-0.619405	-0.694548	-1.00308
210	-1.89483	-0.23263	-0.962754	-1.19157	0.0131579	-0.166861	0.423987	0.981139	-0.350566	1.03281	1.69242	-1.47113	0.766635		210	-0.796106	-0.744311	-0.746037	-1.03013	0.287257	-1.22197	-1.00291	-0.681366	-1.05295	-1.07437	-1.56312	-0.907926	-1.31448		210	-0.313501	-0.8898	-1.08682	-1.40765	-1.09941	-0.650734	0.170728	-1.7641	-1.25507	-1.40112	-1.02695	-1.19543	-0.3936		210	-0.664902	-0.700411	-0.664896	-1.23592
211	-2.1056	-0.507206	-1.1125	-1.44668	-0.325561	-0.480252	0.153428	0.620256	-0.689855	0.726651	1.42488	-1.74935	0.585027		211	-0.939616	-0.704717	-0.944614	-1.17769	0.140783	-1.40743	-1.20347	-0.872599	-1.27082	-1.28863	-1.86672	-1.0637	-1.53338		211	-0.56066	-1.10119	-1.35566	-1.70779	-1.29844	-0.932138	-0.063189	-2.05823	-1.54766	-1.68722	-1.27125	-1.54	-0.772163		211	-0.887138	-0.801134	-0.762697	-1.40495
212	-2.34877	-0.646822	-1.19855	-1.69354	-0.694816	-0.747649	-0.168745	0.289083	-1.04185	0.42625	0.936146	-2.02485	0.198767		212	-1.04116	-0.765549	-1.06524	-1.33981	-0.127418	-1.55026	-1.36311	-1.08677	-1.48089	-1.4434	-2.00879	-1.27468	-1.64889		212	-0.831642	-1.21098	-1.62161	-1.90333	-1.4555	-1.14041	-0.407643	-2.25403	-1.84308	-1.99631	-1.5364	-1.78405	-1.10174		212	-1.06055	-0.815268	-0.864473	-1.4921
213	-2.52	-0.9063	-1.39233	-1.87045	-0.994079	-0.984561	-0.429604	0.0212688	-1.40501	0.175349	0.604169	-2.22344	-0.0112263		213	-1.17208	-0.85676	-1.23971	-1.57346	-0.246126	-1.63792	-1.60769	-1.29597	-1.70773	-1.7041	-2.23272	-1.37949	-1.81087		213	-1.08896	-1.42951	-1.7932	-2.18756	-1.66607	-1.40831	-0.639952	-2.49036	-2.13477	-2.2994	-1.84198	-2.18694	-1.40519		213	-1.12217	-0.974251	-1.03534	-1.62813
214	-2.72164	-1.08191	-1.55637	-2.11444	-1.28683	-1.20805	-0.641383	-0.287883	-1.70319	-0.161941	0.247183	-2.53782	-0.241181		214	-1.27591	-0.981903	-1.32921	-1.7438	-0.416193	-1.767	-1.79873	-1.4684	-1.8893	-1.87342	-2.32556	-1.6592	-1.89291		214	-1.31006	-1.69603	-2.00238	-2.313	-1.82037	-1.6268	-0.936788	-2.65693	-2.28435	-2.5081	-2.09106	-2.60213	-1.68889		214	-1.21346	-1.0758	-1.20219	-1.85527
215	-2.90963	-1.44571	-1.82744	-2.3982	-1.59617	-1.48772	-0.933905	-0.65012	-1.99049	-0.540881	-0.00211065	-2.81866	-0.42765		215	-1.45047	-1.16456	-1.52613	-1.94567	-0.610938	-1.98696	-2.00811	-1.66902	-2.14147	-2.14455	-2.59841	-1.87923	-2.08767		215	-1.46537	-2.04567	-2.15895	-2.5779	-2.06284	-1.93346	-1.16237	-2.93077	-2.50168	-2.64959	-2.33705	-3.0836	-2.05626		215	-1.35703	-1.31702	-1.46324	-2.07391
216	-3.14982	-1.60665	-2.04095	-2.71154	-1.89341	-1.67172	-1.11359	-0.893362	-2.16926	-0.847079	-0.177838	-3.08718	-0.610978		216	-1.46787	-1.17859	-1.5641	-1.96506	-0.814409	-2.14847	-2.06281	-1.77557	-2.25386	-2.24524	-2.69776	-2.05902	-2.09575		216	-1.54752	-2.20064	-2.29315	-2.63003	-2.19979	-2.04835	-1.31321	-3.13374	-2.71154	-2.68842	-2.50756	-3.31863	-2.30722		216	-1.50634	-1.3968	-1.61667	-2.23228
217	-3.3193	-1.79159	-2.30761	-2.93549	-2.22568	-1.97873	-1.42973	-1.2248	-2.32512	-1.16612	-0.503975	-3.32972	-0.811955		217	-1.5467	-1.32101	-1.72594	-2.05978	-1.07997	-2.31222	-2.15398	-1.98479	-2.5106	-2.46557	-2.93466	-2.2377	-2.19286		217	-1.70984	-2.27027	-2.43264	-2.82871	-2.40691	-2.29561	-1.50841	-3.31698	-2.90895	-2.82945	-2.74195	-3.58921	-2.56487		217	-1.66667	-1.56903	-1.78053	-2.40627
218	-3.49237	-1.77193	-2.44699	-3.04845	-2.41368	-2.17007	-1.5574	-1.30428	-2.40458	-1.34119	-0.616487	-3.56663	-0.83562		218	-1.59031	-1.31498	-1.77905	-2.09511	-1.15211	-2.38863	-2.14969	-2.1033	-2.59673	-2.55229	-2.93009	-2.43446	-2.1571		218	-1.87173	-2.31112	-2.58353	-2.86702	-2.46289	-2.37153	-1.57166	-3.41477	-2.98016	-3.03014	-2.84828	-3.6423	-2.6187		218	-1.85794	-1.58413	-1.90669	-2.5747
219	-3.56552	-1.96887	-2.63099	-3.12976	-2.60362	-2.42783	-1.84764	-1.51327	-2.5293	-1.55841	-0.872253	-3.76015	-0.999173		219	-1.7921	-1.57692	-1.93628	-2.27577	-1.33259	-2.47039	-2.32431	-2.29796	-2.84747	-2.76157	-3.01557	-2.61613	-2.33843		219	-2.03372	-2.39316	-2.6984	-3.06547	-2.55457	-2.56748	-1.72898	-3.55407	-3.08899	-3.26285	-2.987	-3.82484	-2.73244		219	-2.06692	-1.80247	-2.0809	-2.75072
220	-3.62551	-2.05976	-2.69571	-3.22031	-2.66257	-2.43489	-1.81081	-1.57437	-2.5804	-1.64032	-0.843038	-3.90888	-1.00664		220	-1.88668	-1.55912	-1.92047	-2.27568	-1.28654	-2.40359	-2.39997	-2.28061	-2.82831	-2.77907	-2.88142	-2.59741	-2.36651		220	-2.04994	-2.46906	-2.71841	-3.03178	-2.49335	-2.52732	-1.69207	-3.61475	-3.17875	-3.29963	-3.0322	-3.79184	-2.70339		220	-2.15262	-1.86046	-2.15777	-2.82689
221	-3.59196	-2.19676	-2.70994	-3.32081	-2.72343	-2.51004	-1.90988	-1.79376	-2.56588	-1.7851	-1.03952	-4.0121	-1.12542		221	-1.96997	-1.67231	-1.964	-2.29746	-1.34961	-2.41596	-2.45317	-2.29085	-2.94119	-2.83494	-2.90555	-2.52895	-2.38406		221	-2.03385	-2.4669	-2.6521	-3.01977	-2.51643	-2.58534	-1.76179	-3.63863	-3.18586	-3.28533	-3.06944	-3.80417	-2.723		221	-2.10021	-1.95283	-2.21871	-2.81681
222	-3.57143	-2.09684	-2.61194	-3.30919	-2.61478	-2.41695	-1.78148	-1.67109	-2.44013	-1.73444	-0.900521	-4.02443	-0.955113		222	-1.90651	-1.49608	-1.86421	-2.21033	-1.19174	-2.42902	-2.32402	-2.14072	-2.7856	-2.74079	-2.79108	-2.32885	-2.15931		222	-1.93851	-2.44367	-2.54154	-2.82806	-2.42813	-2.42006	-1.62047	-3.58092	-3.03828	-3.20157	-2.92641	-3.59622	-2.57479		222	-1.97643	-1.84843	-2.18736	-2.75522
223	-3.49437	-2.08529	-2.54851	-3.23519	-2.56956	-2.41315	-1.82501	-1.62585	-2.32261	-1.71158	-0.984957	-3.97832	-0.991209		223	-1.87286	-1.60415	-1.82528	-2.275	-1.28042	-2.53389	-2.29403	-2.0899	-2.80341	-2.71105	-2.82087	-2.23279	-2.03841		223	-1.86774	-2.35284	-2.46447	-2.75745	-2.36007	-2.40104	-1.60582	-3.50686	-2.82226	-3.18965	-2.82679	-3.54912	-2.48547		223	-1.92737	-1.91318	-2.10599	-2.75706
224	-3.43166	-1.96818	-2.47435	-3.06837	-2.4985	-2.28746	-1.66045	-1.44283	-2.24694	-1.57824	-0.822549	-3.93664	-0.888354		224	-1.81198	-1.51609	-1.76968	-2.25592	-1.20166	-2.51535	-2.19785	-1.99398	-2.64267	-2.61872	-2.72056	-2.14025	-1.91445		224	-1.73331	-2.29896	-2.38711	-2.65667	-2.17446	-2.26296	-1.44136	-3.35131	-2.65752	-3.09695	-2.71869	-3.3927	-2.31572		224	-1.97875	-1.85914	-2.02044	-2.69789
225	-3.27926	-1.90589	-2.34746	-2.90883	-2.39692	-2.22371	-1.61145	-1.3877	-2.15314	-1.47538	-0.79649	-3.8616	-0.918029		225	-1.72038	-1.55357	-1.76231	-2.2153	-1.17324	-2.44696	-2.10117	-1.96392	-2.62398	-2.52435	-2.6764	-2.1274	-1.86044		225	-1.54537	-2.05921	-2.25268	-2.54638	-2.01491	-2.18466	-1.38301	-3.19586	-2.49943	-2.92054	-2.57321	-3.23616	-2.1453		225	-1.98519	-1.77672	-1.96677	-2.55167
226	-3.11606	-1.77848	-2.22272	-2.73347	-2.24276	-2.08699	-1.48657	-1.29398	-2.07932	-1.34552	-0.612894	-3.79091	-0.822837		226	-1.6002	-1.39664	-1.73396	-2.09449	-0.966842	-2.30999	-1.955	-1.88773	-2.47173	-2.40336	-2.48457	-2.04268	-1.81142		226	-1.3909	-1.82115	-2.11619	-2.35916	-1.83397	-1.99031	-1.23801	-2.98901	-2.37662	-2.58767	-2.36781	-2.97158	-1.95941		226	-1.9065	-1.58733	-1.94253	-2.39696
227	-2.8968	-1.70543	-2.0503	-2.60341	-2.04284	-1.92557	-1.33713	-1.20517	-1.91361	-1.19513	-0.509423	-3.66583	-0.7675		227	-1.41184	-1.3133	-1.65447	-1.99146	-0.811458	-2.16117	-1.81978	-1.78489	-2.36236	-2.22916	-2.33604	-1.89975	-1.70268		227	-1.25676	-1.53353	-1.94082	-2.12009	-1.68065	-1.81769	-1.04007	-2.78318	-2.15563	-2.2861	-2.14567	-2.75693	-1.74081		227	-1.72463	-1.5194	-1.84119	-2.2982
228	-2.70555	-1.59196	-1.94661	-2.45367	-1.89925	-1.7838	-1.20999	-1.0752	-1.79022	-1.07419	-0.434344	-3.59892	-0.639591		228	-1.31425	-1.17984	-1.61765	-1.88913	-0.692405	-2.0285	-1.68958	-1.70393	-2.19732	-2.10214	-2.17404	-1.75236	-1.58011		228	-1.18639	-1.45904	-1.77426	-1.97223	-1.55694	-1.62237	-0.825356	-2.5564	-2.00044	-2.05618	-2.00486	-2.55081	-1.59024		228	-1.61774	-1.4571	-1.80334	-2.21442
229	-2.47802	-1.4588	-1.73022	-2.26429	-1.59637	-1.56788	-1.00962	-0.808634	-1.52606	-0.858801	-0.251536	-3.38547	-0.442136		229	-1.16897	-1.06869	-1.48226	-1.74391	-0.584799	-1.86087	-1.49913	-1.5213	-2.00961	-1.87721	-2.05883	-1.55907	-1.3274		229	-0.997464	-1.29141	-1.5415	-1.77855	-1.40284	-1.38325	-0.583176	-2.39701	-1.74401	-1.88879	-1.77756	-2.2699	-1.36613		229	-1.46288	-1.33347	-1.67259	-2.09977
230	-2.28	-1.32003	-1.61465	-2.04154	-1.44408	-1.40804	-0.95112	-0.705845	-1.36618	-0.754979	-0.148788	-3.16761	-0.394456		230	-1.1802	-1.0405	-1.42592	-1.68254	-0.564135	-1.76619	-1.35268	-1.3781	-1.88501	-1.74869	-1.89545	-1.45717	-1.23378		230	-0.903899	-1.18421	-1.42301	-1.69194	-1.29512	-1.21595	-0.500365	-2.2087	-1.59055	-1.72919	-1.65952	-2.0427	-1.30176		230	-1.37341	-1.20253	-1.56951	-2.00043
231	-2.04714	-1.1544	-1.39529	-1.82063	-1.169	-1.1043	-0.663251	-0.46604	-1.09858	-0.470873	0.190863	-2.81572	-0.234885		231	-1.04316	-0.910876	-1.25487	-1.54678	-0.377056	-1.58692	-1.15542	-1.10636	-1.65772	-1.48778	-1.6891	-1.20054	-1.05189		231	-0.699517	-0.97862	-1.27486	-1.44846	-1.15898	-0.984039	-0.249663	-2.03717	-1.37312	-1.54981	-1.44856	-1.72983	-1.08978		231	-1.2123	-1.0468	-1.33598	-1.83848
232	-1.85483	-1.04712	-1.3247	-1.67379	-1.10728	-0.9808	-0.655247	-0.440986	-0.996839	-0.357311	0.180983	-2.65208	-0.26347		232	-1.0078	-0.949526	-1.21524	-1.48969	-0.408605	-1.52274	-1.12047	-1.02193	-1.5719	-1.37543	-1.52068	-1.05678	-1.07194		232	-0.643511	-0.940372	-1.21559	-1.35082	-1.13125	-0.91544	-0.23111	-1.87625	-1.35704	-1.37997	-1.40127	-1.56384	-1.07022		232	-1.17311	-0.936728	-1.29012	-1.69654
233	-1.6599	-0.889848	-1.09765	-1.49744	-0.767716	-0.709502	-0.377465	-0.160253	-0.737127	-0.0666349	0.454666	-2.41115	0.0277534		233	-0.791215	-0.818814	-0.998618	-1.31416	-0.239117	-1.32959	-0.987954	-0.799923	-1.29021	-1.147	-1.36835	-0.754294	-0.930518		233	-0.437494	-0.79898	-1.024	-1.13935	-0.992658	-0.728105	0.00889023	-1.79185	-1.20193	-1.17414	-1.16395	-1.28886	-0.827894		233	-1.04031	-0.746037	-1.14877	-1.52708
234	-1.48719	-0.737698	-0.993782	-1.33154	-0.614768	-0.618332	-0.376945	-0.077183	-0.597457	0.0251151	0.42427	-2.24451	0.0933197		234	-0.727522	-0.874115	-0.858476	-1.27679	-0.232218	-1.24396	-0.872579	-0.705852	-1.17651	-1.07256	-1.22745	-0.668254	-0.960576		234	-0.347799	-0.655174	-0.883912	-1.08096	-0.863182	-0.642932	0.0134704	-1.67794	-1.09612	-1.00196	-1.03207	-1.14989	-0.745232		234	-0.926472	-0.643073	-1.0546	-1.39205
235	-1.24225	-0.532414	-0.73479	-1.09805	-0.234361	-0.313635	-0.0127115	0.297989	-0.323589	0.329362	0.799741	-1.8833	0.420937		235	-0.486722	-0.607877	-0.592971	-1.08753	0.0842898	-1.00602	-0.586161	-0.435566	-0.845193	-0.859979	-1.00181	-0.389953	-0.794427		235	-0.0838841	-0.42784	-0.638166	-0.844918	-0.617496	-0.349714	0.296682	-1.53778	-0.807359	-0.801916	-0.708096	-0.820163	-0.452934		235	-0.685993	-0.469147	-0.772289	-1.17454
236	-1.02036	-0.431839	-0.603279	-0.936893	-0.133859	-0.17333	0.0409228	0.422153	-0.195797	0.418127	0.773588	-1.65439	0.39212		236	-0.372046	-0.548036	-0.510041	-0.984065	0.0927919	-0.917159	-0.434591	-0.351455	-0.777438	-0.744809	-0.816298	-0.295203	-0.777694		236	0.0213608	-0.348612	-0.530021	-0.742432	-0.503898	-0.238884	0.305924	-1.37883	-0.67741	-0.683917	-0.584843	-0.637825	-0.392805		236	-0.538538	-0.369731	-0.66702	-1.01542
237	-0.858717	-0.318551	-0.380429	-0.738583	0.11216	0.0934216	0.328623	0.630752	0.0249695	0.607791	1.02041	-1.36592	0.624016		237	-0.166411	-0.284408	-0.385566	-0.731427	0.266113	-0.713578	-0.239203	-0.155806	-0.544419	-0.541717	-0.674391	-0.0261778	-0.609279		237	0.177927	-0.288451	-0.392396	-0.539782	-0.404832	-0.0775328	0.546606	-1.26836	-0.490379	-0.562535	-0.385277	-0.392425	-0.187748		237	-0.400876	-0.240682	-0.534345	-0.877226
238	-0.788469	-0.19603	-0.30664	-0.611843	0.157129	0.152386	0.280442	0.605709	0.124799	0.621388	0.943188	-1.18481	0.546612		238	-0.12436	-0.302419	-0.314147	-0.6187	0.256458	-0.665357	-0.14491	-0.0995519	-0.512788	-0.414352	-0.599531	0.0259232	-0.575795		238	0.204451	-0.207143	-0.344956	-0.467157	-0.383243	-0.072875	0.534986	-1.20018	-0.454308	-0.489364	-0.392649	-0.33352	-0.189992		238	-0.292477	-0.201788	-0.518058	-0.818978
239	-0.669112	-0.073571	-0.154884	-0.431738	0.394471	0.285798	0.448646	0.685541	0.23699	0.705807	1.11507	-0.925447	0.610063		239	-0.03791	-0.113233	-0.1773	-0.444449	0.474475	-0.519961	-0.0327814	0.00395139	-0.294948	-0.284223	-0.490701	0.181116	-0.473495		239	0.284972	-0.106384	-0.216492	-0.366126	-0.290237	0.057005	0.667655	-1.10556	-0.323555	-0.369328	-0.314249	-0.213601	-0.108674		239	-0.153198	-0.121235	-0.381471	-0.70868
240	-0.49808	0.0148711	-0.0363691	-0.29503	0.586951	0.361253	0.538057	0.835468	0.316884	0.827425	1.19785	-0.744933	0.567501		240	0.0123212	-0.0709519	-0.040452	-0.357772	0.603378	-0.408019	0.0699707	0.0586636	-0.182026	-0.131417	-0.360491	0.222089	-0.409842		240	0.375853	-0.00840613	-0.123898	-0.333262	-0.181428	0.192004	0.721571	-1.00419	-0.259762	-0.288152	-0.264154	-0.0958649	-0.0227727		240	-0.00175511	-0.0295565	-0.258789	-0.564169
241	-0.336842	0.0182482	0.0739074	-0.181718	0.722562	0.416955	0.623684	0.880867	0.36928	0.8914	1.24	-0.626488	0.650723		241	0.0863256	0.0125862	-0.00867617	-0.243187	0.662805	-0.256343	0.169601	0.126399	-0.036911	-0.0556193	-0.282008	0.299405	-0.345534		241	0.40058	0.0208987	-0.0552581	-0.267245	-0.114719	0.279209	0.775158	-0.908596	-0.163996	-0.184461	-0.162435	0.0422367	0.0957151		241	0.0176613	0.0565481	-0.126972	-0.428204
242	-0.252613	0.116314	0.168691	-0.174349	0.806399	0.52451	0.675768	1.07239	0.495753	1.04323	1.30769	-0.532775	0.764141		242	0.244232	0.0101179	0.0937503	-0.189542	0.748699	-0.177805	0.308316	0.262276	0.0699458	0.128137	-0.20704	0.365269	-0.221294		242	0.476377	0.112935	-0.00361386	-0.168954	-0.0126169	0.353062	0.828958	-0.917352	-0.101725	-0.106036	-0.100323	0.201275	0.188024		242	0.102115	0.191792	-0.0470052	-0.357095
243	-0.181729	0.146747	0.212036	-0.200695	0.779673	0.532028	0.616741	0.950521	0.532094	0.930481	1.19364	-0.460167	0.728667		243	0.319722	0.0250241	0.0802432	-0.176786	0.720982	-0.16177	0.304881	0.284565	0.0989948	0.138376	-0.137715	0.378727	-0.175566		243	0.382127	0.105631	0.017498	-0.158907	0.0150113	0.30991	0.774653	-0.878798	-0.0117915	-0.0340251	-0.133472	0.213081	0.124484		243	0.0832735	0.241663	-0.015744	-0.343012
244	-0.0707194	0.29951	0.317744	-0.152827	0.979091	0.716574	0.855124	1.23615	0.708471	1.1445	1.52027	-0.277596	0.965668		244	0.453997	0.160684	0.275625	-0.0856391	0.927969	-0.0393876	0.457043	0.469491	0.279151	0.37615	0.0219398	0.525387	0.0338663		244	0.528468	0.210013	0.106881	-0.077485	0.123473	0.471705	1.03206	-0.857775	0.0940762	0.0405466	-0.0313544	0.372307	0.299345		244	0.256278	0.365225	0.114589	-0.239619
245	0.0138291	0.229298	0.26795	-0.0826181	0.853887	0.616705	0.704017	0.992826	0.613437	0.933668	1.26446	-0.253204	0.804738		245	0.369573	0.0744411	0.204344	-0.068412	0.684551	-0.0377043	0.407075	0.411794	0.21332	0.328139	0.0541744	0.460571	0.000334414		245	0.394589	0.223504	0.0908717	-0.102375	0.0430363	0.3693	0.913869	-0.760785	0.0976155	0.0978957	-0.034333	0.313286	0.215559		245	0.20454	0.331475	0.137178	-0.167505
246	0.0776845	0.374562	0.413769	0.101321	1.10779	0.867942	1.03915	1.46092	0.782635	1.25406	1.641	-0.0862961	1.11312		246	0.535885	0.257518	0.416638	0.0885845	0.960993	0.162367	0.581585	0.631047	0.453959	0.578515	0.104784	0.696834	0.22204		246	0.635746	0.394335	0.209421	0.0391694	0.150899	0.601047	1.20833	-0.754013	0.177578	0.173807	0.218532	0.538196	0.426441		246	0.404914	0.47299	0.291044	-0.0236758
247	0.103684	0.318285	0.369155	0.155825	0.95432	0.731802	0.760114	1.13969	0.681185	0.994761	1.20591	-0.127137	0.750934		247	0.456419	0.121393	0.282362	0.0671841	0.738138	0.121206	0.460327	0.498323	0.286077	0.432908	0.0696218	0.58959	0.123429		247	0.48739	0.375446	0.150225	-0.00225352	0.0722952	0.50793	0.940002	-0.6814	0.151713	0.208141	0.160215	0.405647	0.184536		247	0.337838	0.386758	0.260976	0.000843715
248	0.163921	0.497865	0.510977	0.260358	1.3204	1.0258	1.1055	1.57286	0.906242	1.42436	1.73438	0.0403418	1.09685		248	0.633781	0.354741	0.472831	0.227201	1.15452	0.279498	0.697845	0.732631	0.568313	0.644664	0.190149	0.845733	0.343339		248	0.823499	0.465596	0.262337	0.133502	0.211564	0.812658	1.30807	-0.695839	0.242782	0.29274	0.321542	0.609282	0.380763		248	0.540971	0.507016	0.426322	0.128536
249	0.152805	0.345559	0.35903	0.168396	1.01242	0.752447	0.654612	1.00339	0.686279	1.04242	1.18442	-0.0382075	0.641601		249	0.473009	0.0938599	0.274794	0.124577	0.759248	0.0859169	0.536828	0.519408	0.281464	0.386716	0.203621	0.570248	0.165999		249	0.582342	0.363487	0.184552	0.0479895	0.0927351	0.534396	0.921722	-0.567323	0.149809	0.261742	0.102947	0.383103	0.130947		249	0.354951	0.374609	0.306981	0.0958421
250	0.148172	0.46238	0.447279	0.239646	1.17494	0.887184	0.987696	1.31419	0.774089	1.29454	1.5939	0.16648	1.07669		250	0.572309	0.357215	0.478623	0.253275	1.05549	0.272541	0.647801	0.674282	0.54194	0.513749	0.250718	0.739055	0.374784		250	0.769862	0.386084	0.303409	0.157013	0.240635	0.659765	1.14919	-0.421064	0.22338	0.239621	0.290266	0.585519	0.48384		250	0.458831	0.457221	0.399827	0.168254
[truncated: 9 more columns]
