# Supplementary material for: Rapid restructurization of conformationally-distinct alpha-synuclein amyloid fibrils at an elevated temperature
Source: PeerJ. 2022 Sep 30;10:e14137. doi: 10.7717/peerj.14137 (PMC9528901; doi:10.7717/peerj.14137)
Supplement: Supplemental Information 3 [file peerj-10-14137-s003.xlsx]

## Sheet: Initial
	[nm]	A01	X1
[nm]		470	471	472	473	474	475	476	477	478	479	480	481	482	483	484	485	486	487	488	489	490	491	492	493	494	495	496	497	498	499	500
	430	52822.8	54750.7	56044.4	57890.6	59412.1	60488.5	61274.4	61992.5	62899.3	63425.1	63091.8	63595.9	63245.6	63859.6	63708.9	63067.8	62686.4	62445.2	61464.1	60867.2	60258.2	59571.9	58775.9	58289.2	57498.2	57020.2	55937.5	55584	54524.7	54003.4	53088.2
	431	52839.1	54767.5	56061.6	57908.3	59430.3	60507	61293.2	62011.5	62918.6	63444.5	63111.2	63615.4	63265	63879.2	63728.4	63087.2	62705.7	62464.4	61483	60885.8	60276.7	59590.2	58793.9	58307.1	57515.8	57037.7	55954.7	55601	54541.4	54020	53104.5
	432	53143.7	55083.2	56384.9	58242.2	59773	60855.9	61646.6	62369	63281.3	63810.3	63475	63982.2	63629.7	64247.5	64095.9	63450.9	63067.2	62824.5	61837.5	61236.9	60624.3	59933.8	59132.9	58643.3	57847.4	57366.5	56277.3	55921.6	54855.8	54331.4	53410.7
	433	53791.4	55754.6	57072.1	58952	60501.5	61597.6	62397.9	63129.1	64052.6	64588	64248.6	64762	64405.2	65030.5	64877	64224.2	63835.8	63590.2	62591.1	61983.2	61363.1	60664.2	59853.6	59358	58552.5	58065.7	56963.2	56603.1	55524.4	54993.6	54061.6
	434	54679.1	56674.7	58013.9	59924.9	61499.9	62614.1	63427.6	64170.9	65109.6	65653.9	65308.9	65830.7	65468.1	66103.7	65947.7	65284.1	64889.3	64639.6	63624	63006.1	62375.8	61665.3	60841.3	60337.6	59518.7	59023.9	57903.2	57537.2	56440.7	55901.1	54953.8
	435	55756.5	57791.4	59157	61105.7	62711.7	63847.9	64677.5	65435.4	66392.6	66947.6	66595.8	67127.9	66758.1	67406.3	67247.1	66570.5	66167.9	65913.3	64877.7	64247.6	63604.9	62880.4	62040.2	61526.5	60691.5	60186.9	59044.2	58671	57552.8	57002.6	56036.6
	436	56179	58229.3	59605.3	61568.7	63186.9	64331.7	65167.5	65931.2	66895.7	67454.9	67100.4	67636.5	67264	67917	67756.7	67074.9	66669.3	66412.7	65369.3	64734.4	64086.8	63356.9	62510.3	61992.7	61151.4	60643	59491.6	59115.6	57988.9	57434.6	56461.2
	437	57136.1	59221.4	60620.8	62617.6	64263.4	65427.7	66277.8	67054.5	68035.3	68604.1	68243.6	68788.8	68409.9	69074.1	68911	68217.6	67805.1	67544.2	66483	65837.3	65178.6	64436.3	63575.3	63048.9	62193.2	61676.1	60505.1	60122.7	58976.9	58413	57423.1
	438	58351.4	60481	61910.2	63949.5	65630.3	66819.3	67687.5	68480.7	69482.4	70063.3	69695.1	70251.9	69865	70543.3	70376.7	69668.6	69247.3	68980.8	67897.1	67237.6	66565	65806.8	64927.5	64389.9	63516	62988	61792	61401.5	60231.3	59655.5	58644.5
	439	59893.4	62079.3	63546.2	65639.4	67364.6	68585.1	69476.2	70290.4	71318.6	71914.8	71536.9	72108.4	71711.2	72407.5	72236.5	71509.7	71077.2	70803.7	69691.3	69014.5	68324	67545.9	66643.3	66091.5	65194.5	64652.5	63425	63024.1	61823	61231.9	60194.3
	440	60318.9	62520.4	63997.7	66105.8	67843.3	69072.4	69969.9	70789.8	71825.3	72425.8	72045.2	72620.8	72220.8	72922	72749.8	72017.8	71582.3	71306.8	70186.5	69504.8	68809.5	68025.8	67116.8	66561.1	65657.8	65111.9	63875.6	63471.9	62262.3	61667	60622
	441	61437.8	63680.1	65184.8	67332.1	69101.7	70353.6	71267.8	72102.9	73157.6	73769.2	73381.6	73967.9	73560.4	74274.6	74099.3	73353.7	72910.1	72629.5	71488.4	70794.1	70085.9	69287.6	68361.8	67795.7	66875.7	66319.7	65060.5	64649.3	63417.2	62810.9	61746.5
	442	62424.8	64703.1	66232	68413.8	70211.9	71483.9	72412.7	73261.3	74332.9	74954.3	74560.5	75156.2	74742.2	75467.8	75289.7	74532.1	74081.4	73796.3	72636.9	71931.4	71211.8	70400.7	69460	68884.9	67950	67385.1	66105.7	65687.9	64436	63820	62738.4
	443	62968.8	65266.9	66809.2	69009.9	70823.7	72106.8	73043.7	73899.7	74980.7	75607.5	75210.2	75811.1	75393.5	76125.5	75945.8	75181.6	74726.9	74439.4	73269.9	72558.2	71832.3	71014.2	70065.3	69485.2	68542.2	67972.3	66681.7	66260.3	64997.5	64376.1	63285.1
	444	63565.2	65885.1	67442	69663.5	71494.5	72789.7	73735.5	74599.6	75690.8	76323.6	75922.5	76529.1	76107.5	76846.5	76665.1	75893.7	75434.7	75144.4	73963.8	73245.5	72512.7	71686.8	70728.9	70143.3	69191.3	68616.1	67313.3	66887.8	65613.1	64985.8	63884.5
	445	64671.7	67032	68615.9	70876.2	72739	74056.8	75019	75898.1	77008.4	77652.1	77244.1	77861.3	77432.4	78184.1	77999.6	77214.7	76747.8	76452.5	75251.3	74520.4	73774.9	72934.7	71960.1	71364.3	70395.8	69810.5	68485	68052.1	66755.2	66117	64996.6
	446	65535.9	67927.8	69532.9	71823.4	73711.1	75046.5	76021.6	76912.4	78037.5	78689.9	78276.4	78901.8	78467.2	79229	79042	78246.6	77773.4	77474.2	76257	75516.3	74760.8	73909.4	72921.7	72318	71336.5	70743.4	69400.2	68961.6	67647.3	67000.6	65865.2
	447	66480.9	68907.2	70535.5	72858.9	74773.9	76128.5	77117.7	78021.4	79162.7	79824.5	79405	80039.4	79598.5	80371.4	80181.6	79374.9	78894.8	78591.2	77356.5	76605.2	75838.8	74975	73973.2	73360.7	72365.1	71763.5	70400.9	69955.9	68622.7	67966.7	66814.9
	448	67035.6	69482.2	71124	73466.9	75397.8	76763.8	77761.2	78672.4	79823.2	80490.5	80067.6	80707.3	80262.7	81042	80850.7	80037.2	79553.1	79247	78002	77244.4	76471.6	75600.6	74590.4	73972.8	72968.9	72362.3	70988.3	70539.6	69195.3	68533.8	67372.4
	449	68126.1	70612.5	72281	74662	76624.3	78012.5	79026.2	79952.2	81121.8	81799.9	81370.1	82020.2	81568.4	82360.3	82165.9	81339.2	80847.3	80536.2	79270.9	78500.9	77715.6	76830.5	75803.8	75176.2	74155.9	73539.4	72143.1	71687.2	70321	69648.7	68468.4
	450	67655.6	70124.8	71781.8	74146.4	76095.1	77473.7	78480.4	79400.1	80561.5	81235	80808.1	81453.7	81005.1	81791.5	81598.5	80777.4	80288.9	79980	78723.4	77958.8	77178.9	76299.8	75280.3	74657	73643.8	73031.5	71644.9	71192.1	69835.3	69167.6	67995.5
	451	67549.2	70014.4	71668.9	74029.7	75975.4	77351.8	78356.9	79275.1	80434.8	81107.2	80681	81325.6	80877.6	81662.8	81470.1	80650.3	80162.6	79854.1	78599.5	77836.1	77057.4	76179.8	75161.8	74539.5	73527.9	72916.6	71532.2	71080	69725.4	69058.8	67888.5
	452	67978.6	70459.6	72124.6	74500.4	76458.5	77843.6	78855.1	79779.2	80946.2	81622.8	81193.9	81842.6	81391.8	82182	81988	81163.1	80672.2	80361.8	79099.2	78331	77547.4	76664.1	75639.7	75013.4	73995.4	73380.2	71987	71532	70168.7	69497.9	68320.1
	453	67836.6	70312.4	71973.9	74344.7	76298.7	77681	78690.3	79612.5	80777.1	81452.3	81024.3	81671.7	81221.8	82010.4	81816.8	80993.5	80503.7	80193.9	78934	78167.4	77385.4	76504	75481.7	74856.7	73840.8	73226.9	71836.6	71382.5	70022.1	69352.7	68177.4
	454	67908.8	70387.2	72050.4	74423.8	76379.9	77763.6	78774	79697.2	80863	81538.9	81110.5	81758.5	81308.2	82097.6	81903.8	81079.7	80589.3	80279.2	79018	78250.5	77467.7	76585.3	75562	74936.3	73919.4	73304.8	71913	71458.4	70096.6	69426.5	68249.9
	455	67795.5	70269.7	71930.2	74299.6	76252.4	77633.9	78642.6	79564.2	80728.1	81402.9	80975.2	81622.1	81172.5	81960.6	81767.1	80944.4	80454.9	80145.3	78886.1	78119.9	77338.4	76457.6	75435.9	74811.3	73796	73182.5	71793	71339.2	69979.6	69310.6	68136
	456	66515.1	68942.6	70571.7	72896.4	74812.3	76167.7	77157.3	78061.5	79203.4	79865.5	79445.8	80080.6	79639.5	80412.7	80222.8	79415.6	78935.4	78631.6	77396.2	76644.5	75877.8	75013.6	74011.2	73398.4	72402.3	71800.3	70437.1	69991.9	68658	68001.6	66849.2
	457	66419.1	68843.2	70470	72791.3	74704.4	76057.8	77046.1	77949	79089.2	79750.3	79331.3	79965.1	79524.6	80296.7	80107.2	79301.1	78821.6	78518.3	77284.7	76534	75768.4	74905.4	73904.5	73292.6	72297.9	71696.8	70335.5	69891	68559	67903.5	66752.8
	458	66201	68617.1	70238.5	72552.2	74459.1	75808.1	76793	77693	78829.4	79488.4	79070.7	79702.5	79263.4	80033	79844.1	79040.7	78562.7	78260.4	77030.8	76282.7	75519.5	74659.4	73661.8	73051.8	72060.4	71461.4	70104.5	69661.4	68333.8	67680.5	66533.6
	459	65347.7	67732.6	69333.1	71617	73499.3	74830.9	75803.2	76691.5	77813.3	78463.8	78051.5	78675.1	78241.7	79001.4	78814.9	78021.8	77550	77251.6	76037.9	75299.4	74546.1	73697	72712.2	72110.2	71131.6	70540.2	69200.9	68763.5	67453	66808.1	65676
	460	64955.3	67326	68916.9	71187	73058	74381.6	75348.1	76231	77346.2	77992.7	77582.9	78202.8	77772	78527.1	78341.7	77553.4	77084.4	76787.8	75581.4	74847.3	74098.5	73254.6	72275.7	71677.3	70704.5	70116.7	68785.4	68350.6	67048	66407	65281.7
	[nm]	A02	X2
[nm]		470	471	472	473	474	475	476	477	478	479	480	481	482	483	484	485	486	487	488	489	490	491	492	493	494	495	496	497	498	499	500
	430	5097.98	5204.05	5238.79	5351.36	5418.06	5466.16	5501.52	5523.13	5566.45	5605.76	5556.17	5601.95	5566.69	5588.38	5570.89	5521.62	5500.23	5491.98	5426.45	5385.94	5348.1	5297.09	5242.18	5222.41	5166.36	5137.19	5051.99	5040.16	4959.42	4926.1	4848.05
	431	5221.71	5330.35	5365.93	5481.23	5549.56	5598.82	5635.04	5657.18	5701.54	5741.8	5691.01	5737.91	5701.79	5724.01	5706.09	5655.63	5633.71	5625.27	5558.15	5516.65	5477.89	5425.65	5369.4	5349.16	5291.74	5261.87	5174.59	5162.48	5079.79	5045.65	4965.71
	432	5251.27	5360.53	5396.31	5512.26	5580.98	5630.52	5666.94	5689.21	5733.82	5774.31	5723.23	5770.4	5734.07	5756.42	5738.4	5687.65	5665.61	5657.12	5589.62	5547.89	5508.9	5456.36	5399.8	5379.44	5321.7	5291.66	5203.89	5191.71	5108.55	5074.22	4993.83
	433	5282.06	5391.96	5427.96	5544.59	5613.7	5663.53	5700.17	5722.57	5767.44	5808.17	5756.8	5804.23	5767.7	5790.17	5772.05	5721	5698.83	5690.29	5622.39	5580.42	5541.21	5488.36	5431.47	5410.99	5352.91	5322.69	5234.41	5222.15	5138.5	5103.98	5023.11
	434	5330.76	5441.68	5478	5595.71	5665.46	5715.75	5752.73	5775.33	5820.62	5861.73	5809.88	5857.75	5820.88	5843.56	5825.27	5773.75	5751.38	5742.76	5674.23	5631.87	5592.3	5538.96	5481.55	5460.88	5402.26	5371.77	5282.67	5270.3	5185.88	5151.04	5069.43
	435	5383.91	5495.92	5532.61	5651.49	5721.94	5772.73	5810.08	5832.91	5878.65	5920.16	5867.79	5916.15	5878.91	5901.82	5883.34	5831.31	5808.71	5800.01	5730.8	5688.02	5648.05	5594.18	5536.19	5515.32	5456.12	5425.32	5335.33	5322.84	5237.58	5202.39	5119.96
	436	5384.04	5496.06	5532.75	5651.64	5722.09	5772.88	5810.23	5833.05	5878.8	5920.31	5867.94	5916.3	5879.06	5901.97	5883.49	5831.46	5808.86	5800.15	5730.95	5688.16	5648.19	5594.33	5536.33	5515.46	5456.26	5425.45	5335.47	5322.97	5237.71	5202.52	5120.09
	437	5407.09	5519.59	5556.44	5675.83	5746.58	5797.59	5835.09	5858.02	5903.96	5945.65	5893.06	5941.62	5904.22	5927.23	5908.67	5856.42	5833.72	5824.98	5755.48	5712.51	5672.37	5618.27	5560.03	5539.07	5479.61	5448.68	5358.31	5345.76	5260.13	5224.79	5142.01
	438	5464.52	5578.21	5615.45	5736.11	5807.61	5859.16	5897.07	5920.24	5966.66	6008.8	5955.65	6004.72	5966.93	5990.18	5971.43	5918.61	5895.68	5886.85	5816.6	5773.18	5732.61	5677.94	5619.08	5597.9	5537.81	5506.55	5415.22	5402.53	5316	5280.28	5196.62
	439	5541.29	5656.58	5694.34	5816.7	5889.2	5941.48	5979.92	6003.41	6050.49	6093.22	6039.32	6089.08	6050.76	6074.34	6055.32	6001.76	5978.51	5969.55	5898.32	5854.29	5813.15	5757.71	5698.03	5676.54	5615.61	5583.91	5491.29	5478.43	5390.68	5354.46	5269.63
	440	5513.53	5628.25	5665.82	5787.56	5859.71	5911.72	5949.97	5973.34	6020.19	6062.7	6009.07	6058.59	6020.45	6043.91	6024.99	5971.71	5948.57	5939.65	5868.78	5824.97	5784.04	5728.87	5669.49	5648.11	5587.48	5555.94	5463.79	5451	5363.68	5327.64	5243.24
	441	5531.49	5646.58	5684.28	5806.42	5878.8	5930.98	5969.35	5992.8	6039.8	6082.45	6028.65	6078.32	6040.06	6063.6	6044.62	5991.16	5967.95	5959	5887.9	5843.94	5802.88	5747.53	5687.96	5666.51	5605.68	5574.04	5481.59	5468.75	5381.15	5345	5260.32
	442	5554.17	5669.72	5707.57	5830.21	5902.89	5955.29	5993.81	6017.36	6064.55	6107.38	6053.35	6103.23	6064.82	6088.45	6069.39	6015.71	5992.4	5983.42	5912.03	5867.89	5826.66	5771.09	5711.27	5689.73	5628.66	5596.88	5504.05	5491.17	5403.21	5366.9	5281.87
	443	5513.25	5627.95	5665.53	5787.26	5859.4	5911.41	5949.66	5973.03	6019.87	6062.39	6008.76	6058.27	6020.14	6043.6	6024.68	5971.4	5948.26	5939.34	5868.47	5824.66	5783.74	5728.57	5669.19	5647.82	5587.19	5555.65	5463.51	5450.71	5363.4	5327.37	5242.96
	444	5460.28	5573.88	5611.1	5731.66	5803.11	5854.62	5892.5	5915.65	5962.04	6004.14	5951.03	6000.07	5962.3	5985.53	5966.79	5914.03	5891.11	5882.28	5812.09	5768.7	5728.17	5673.54	5614.73	5593.56	5533.51	5502.28	5411.02	5398.34	5311.87	5276.18	5192.59
	445	5473.37	5587.24	5624.54	5745.4	5817.02	5868.65	5906.62	5929.82	5976.33	6018.53	5965.29	6014.45	5976.59	5999.88	5981.1	5928.2	5905.23	5896.38	5826.02	5782.53	5741.9	5687.14	5628.18	5606.96	5546.78	5515.46	5423.98	5411.28	5324.61	5288.83	5205.04
	446	5432.94	5545.97	5583	5702.96	5774.05	5825.3	5862.99	5886.02	5932.18	5974.08	5921.23	5970.02	5932.44	5955.56	5936.92	5884.41	5861.61	5852.83	5782.99	5739.82	5699.48	5645.13	5586.61	5565.55	5505.8	5474.72	5383.92	5371.31	5285.28	5249.76	5166.59
	447	5416.53	5529.22	5566.14	5685.74	5756.61	5807.71	5845.28	5868.25	5914.26	5956.03	5903.35	5951.99	5914.53	5937.57	5918.98	5866.64	5843.91	5835.15	5765.52	5722.48	5682.27	5628.08	5569.74	5548.74	5489.18	5458.19	5367.66	5355.09	5269.31	5233.91	5150.99
	448	5362.15	5473.71	5510.25	5628.65	5698.82	5749.4	5786.6	5809.33	5854.89	5896.24	5844.08	5892.24	5855.15	5877.96	5859.56	5807.74	5785.24	5776.57	5707.64	5665.03	5625.22	5571.57	5513.82	5493.03	5434.07	5403.39	5313.77	5301.33	5216.41	5181.36	5099.27
	449	5342.08	5453.23	5489.63	5607.59	5677.49	5727.89	5764.94	5787.59	5832.98	5874.17	5822.21	5870.19	5833.24	5855.97	5837.63	5786.01	5763.59	5754.95	5686.28	5643.83	5604.17	5550.73	5493.19	5472.47	5413.73	5383.17	5293.89	5281.49	5196.89	5161.97	5080.19
	450	5180.75	5288.54	5323.84	5438.24	5506.03	5554.9	5590.84	5612.8	5656.82	5696.77	5646.38	5692.9	5657.07	5679.12	5661.34	5611.27	5589.53	5581.15	5514.55	5473.38	5434.93	5383.09	5327.29	5307.2	5250.24	5220.6	5134.01	5121.99	5039.94	5006.08	4926.77
	451	5054.31	5159.47	5193.91	5305.51	5371.65	5419.33	5454.39	5475.82	5518.76	5557.74	5508.57	5553.96	5519	5540.51	5523.17	5474.32	5453.11	5444.93	5379.97	5339.8	5302.28	5251.71	5197.27	5177.68	5122.1	5093.18	5008.71	4996.98	4916.94	4883.9	4806.52
	452	4973.77	5077.25	5111.14	5220.97	5286.05	5332.97	5367.47	5388.56	5430.82	5469.17	5420.79	5465.46	5431.06	5452.22	5435.15	5387.08	5366.21	5358.17	5294.23	5254.71	5217.79	5168.02	5114.45	5095.17	5040.48	5012.02	4928.89	4917.35	4838.58	4806.07	4729.93
	453	4838.82	4939.5	4972.47	5079.32	5142.63	5188.28	5221.85	5242.36	5283.47	5320.79	5273.72	5317.18	5283.71	5304.3	5287.69	5240.93	5220.62	5212.79	5150.6	5112.14	5076.22	5027.81	4975.69	4956.93	4903.72	4876.04	4795.17	4783.94	4707.31	4675.68	4601.6
	454	4724.06	4822.35	4854.54	4958.85	5020.66	5065.23	5098	5118.03	5158.16	5194.59	5148.64	5191.07	5158.39	5178.49	5162.28	5116.63	5096.8	5089.16	5028.44	4990.9	4955.83	4908.56	4857.68	4839.37	4787.42	4760.39	4681.44	4670.48	4595.66	4564.79	4492.46
	455	4584.36	4679.75	4710.99	4812.21	4872.2	4915.45	4947.25	4966.68	5005.63	5040.98	4996.39	5037.56	5005.85	5025.36	5009.63	4965.32	4946.08	4938.67	4879.74	4843.31	4809.28	4763.41	4714.04	4696.26	4645.85	4619.62	4543	4532.37	4459.77	4429.8	4359.62
	456	4380.13	4471.26	4501.11	4597.82	4655.14	4696.46	4726.84	4745.41	4782.63	4816.4	4773.8	4813.13	4782.84	4801.48	4786.44	4744.11	4725.73	4718.65	4662.35	4627.54	4595.02	4551.2	4504.02	4487.04	4438.87	4413.82	4340.61	4330.44	4261.08	4232.45	4165.39
	457	4263.54	4352.25	4381.3	4475.45	4531.23	4571.46	4601.03	4619.11	4655.33	4688.21	4646.74	4685.03	4655.53	4673.68	4659.04	4617.84	4599.95	4593.05	4538.25	4504.37	4472.72	4430.06	4384.14	4367.61	4320.73	4296.33	4225.08	4215.18	4147.66	4119.8	4054.52
	458	4130.93	4216.87	4245.02	4336.24	4390.29	4429.26	4457.92	4475.43	4510.53	4542.38	4502.2	4539.3	4510.73	4528.3	4514.13	4474.2	4456.87	4450.19	4397.09	4364.26	4333.6	4292.27	4247.77	4231.76	4186.33	4162.7	4093.66	4084.07	4018.65	3991.65	3928.41
	459	3977.86	4060.62	4087.73	4175.57	4227.62	4265.14	4292.73	4309.6	4343.4	4374.07	4335.38	4371.1	4343.59	4360.51	4346.86	4308.42	4291.73	4285.29	4234.16	4202.55	4173.02	4133.22	4090.38	4074.95	4031.21	4008.46	3941.97	3932.74	3869.75	3843.75	3782.85
	460	3864.38	3944.78	3971.12	4056.45	4107.01	4143.47	4170.27	4186.66	4219.49	4249.29	4211.7	4246.4	4219.67	4236.12	4222.86	4185.51	4169.29	4163.04	4113.37	4082.66	4053.97	4015.31	3973.69	3958.7	3916.21	3894.1	3829.52	3820.55	3759.35	3734.09	3674.93
	[nm]	A03	X3
[nm]		470	471	472	473	474	475	476	477	478	479	480	481	482	483	484	485	486	487	488	489	490	491	492	493	494	495	496	497	498	499	500
	430	32049.3	33093.4	33750	34817.2	35584.8	36162.9	36613.9	37001.3	37443.5	37766.1	37560.7	37904	37707.8	37775.1	37667.6	37289.1	37080.5	36908.5	36384.4	35999.8	35655.9	35272.4	34792.3	34520.5	33985.2	33743.4	33090.2	32872.1	32265.7	31969.1	31413.6
	431	32282.1	33333.8	33995.2	35070.1	35843.3	36425.5	36879.8	37270.1	37715.5	38040.5	37833.5	38179.3	37981.7	38049.5	37941.2	37560	37349.8	37176.6	36648.7	36261.3	35914.9	35528.6	35045.1	34771.3	34232.1	33988.5	33330.5	33110.9	32500	32201.3	31641.8
	432	32721.7	33787.7	34458.1	35547.7	36331.4	36921.6	37382	37777.7	38229.1	38558.5	38348.7	38699.3	38498.9	38567.7	38457.9	38071.5	37858.4	37682.9	37147.8	36755.1	36404	36012.5	35522.3	35244.8	34698.3	34451.4	33784.4	33561.8	32942.6	32639.8	32072.7
	433	33207.6	34289.4	34969.8	36075.5	36870.8	37469.8	37937.1	38338.6	38796.7	39131	38918.2	39273.9	39070.6	39140.3	39029	38636.8	38420.6	38242.5	37699.4	37300.9	36944.5	36547.2	36049.8	35768.1	35213.5	34963	34286.1	34060.2	33431.8	33124.5	32548.9
	434	33815.4	34917.1	35609.9	36735.9	37545.8	38155.7	38631.6	39040.4	39506.9	39847.3	39630.6	39992.8	39785.8	39856.8	39743.4	39344.1	39123.9	38942.5	38389.5	37983.7	37620.8	37216.2	36709.7	36422.9	35858.1	35603	34913.7	34683.6	34043.8	33730.8	33144.7
	435	34435.5	35557.4	36262.9	37409.5	38234.2	38855.3	39339.9	39756.3	40231.3	40578	40357.2	40726.1	40515.3	40587.7	40472.2	40065.5	39841.3	39656.6	39093.4	38680.2	38310.6	37898.6	37382.8	37090.7	36515.6	36255.8	35553.9	35319.6	34668	34349.3	33752.5
	436	34749.1	35881.2	36593.1	37750.2	38582.5	39209.2	39698.2	40118.4	40597.8	40947.6	40724.8	41097.1	40884.3	40957.3	40840.8	40430.4	40204.1	40017.7	39449.5	39032.4	38659.6	38243.8	37723.3	37428.6	36848.2	36586	35877.7	35641.3	34983.8	34662.2	34059.9
	437	35323.4	36474.2	37197.9	38374.1	39220.1	39857.2	40354.3	40781.4	41268.7	41624.3	41397.8	41776.2	41560	41634.2	41515.7	41098.6	40868.6	40679.1	40101.4	39677.5	39298.5	38875.8	38346.7	38047.1	37457.2	37190.7	36470.6	36230.3	35561.9	35235	34622.8
	438	36159.5	37337.5	38078.4	39282.4	40148.4	40800.6	41309.5	41746.7	42245.5	42609.5	42377.7	42765.1	42543.7	42619.7	42498.4	42071.4	41835.9	41642	41050.6	40616.7	40228.6	39796	39254.3	38947.7	38343.7	38070.9	37333.9	37087.9	36403.7	36069	35442.3
	439	37131.2	38340.9	39101.7	40338.1	41227.4	41897.1	42419.6	42868.6	43380.8	43754.6	43516.6	43914.3	43687	43765	43640.5	43202	42960.2	42761	42153.8	41708.2	41309.8	40865.5	40309.3	39994.4	39374.2	39094.1	38337.2	38084.6	37382	37038.3	36394.8
	440	37418.2	38637.3	39403.9	40649.9	41546	42220.9	42747.5	43199.9	43716.1	44092.8	43852.9	44253.8	44024.7	44103.3	43977.8	43535.9	43292.3	43091.6	42479.7	42030.6	41629.1	41181.4	40620.8	40303.5	39678.5	39396.2	38633.5	38379	37670.9	37324.6	36676.1
	441	38199.6	39444.2	40226.8	41498.8	42413.6	43102.6	43640.2	44102	44629	45013.6	44768.7	45177.9	44944.1	45024.3	44896.2	44445.1	44196.3	43991.4	43366.7	42908.3	42498.4	42041.3	41469.1	41145.1	40507.1	40218.9	39440.3	39180.4	38457.6	38104	37442
	442	38831.4	40096.5	40892.1	42185.1	43115.1	43815.5	44362	44831.5	45367.2	45758.1	45509.1	45925.1	45687.4	45769	45638.7	45180.2	44927.3	44719	44084	43618	43201.3	42736.7	42155	41825.7	41177.1	40884.1	40092.6	39828.4	39093.6	38734.3	38061.2
	443	39219.6	40497.4	41300.9	42606.8	43546.1	44253.5	44805.4	45279.6	45820.7	46215.5	45964.1	46384.2	46144.1	46226.5	46095	45631.8	45376.4	45166.1	44524.7	44054	43633.1	43163.9	42576.4	42243.8	41588.7	41292.8	40493.4	40226.6	39484.4	39121.5	38441.7
	444	39649.3	40941.1	41753.4	43073.6	44023.2	44738.4	45296.3	45775.7	46322.7	46721.9	46467.7	46892.4	46649.7	46733	46600	46131.8	45873.6	45660.9	45012.5	44536.7	44111.2	43636.8	43042.9	42706.6	42044.4	41745.2	40937.1	40667.3	39917	39550.1	38862.9
	445	40413	41729.7	42557.6	43903.3	44871.2	45600.1	46168.8	46657.4	47215	47621.8	47362.7	47795.7	47548.3	47633.1	47497.6	47020.3	46757.2	46540.4	45879.5	45394.5	44960.9	44477.3	43872	43529.2	42854.2	42549.3	41725.6	41450.6	40685.9	40311.9	39611.5
	446	40982.3	42317.5	43157.2	44521.8	45503.3	46242.5	46819.2	47314.7	47880.1	48292.7	48029.9	48469	48218.1	48304.2	48166.7	47682.7	47415.9	47196.1	46525.9	46034	45594.2	45103.9	44490	44142.4	43457.9	43148.7	42313.4	42034.6	41259.1	40879.8	40169.5
	447	41645.2	43002	43855.2	45241.9	46239.3	46990.4	47576.5	48080	48654.5	49073.8	48806.8	49252.9	48998	49085.4	48945.8	48453.9	48182.8	47959.4	47278.4	46778.6	46331.7	45833.4	45209.6	44856.4	44160.8	43846.6	42997.8	42714.4	41926.4	41541	40819.2
	448	41998.4	43366.6	44227.1	45625.6	46631.4	47388.9	47979.9	48487.7	49067.1	49489.9	49220.7	49670.6	49413.5	49501.7	49360.8	48864.9	48591.4	48366.1	47679.3	47175.3	46724.6	46222.1	45593	45236.8	44535.3	44218.5	43362.4	43076.7	42282	41893.3	41165.4
	449	42714.1	44105.7	44980.8	46403.1	47426.1	48196.5	48797.6	49314	49903.3	50333.3	50059.5	50517.1	50255.6	50345.3	50202	49697.6	49419.5	49190.4	48491.8	47979.2	47520.9	47009.8	46369.9	46007.7	45294.3	44972	44101.4	43810.8	43002.5	42607.2	41866.9
	450	42380.7	43761.5	44629.7	46040.9	47055.9	47820.4	48416.8	48929.2	49513.8	49940.5	49668.8	50122.8	49863.3	49952.4	49810.2	49309.7	49033.8	48806.4	48113.4	47604.7	47150	46642.9	46008	45648.6	44940.8	44621	43757.2	43468.8	42666.9	42274.7	41540.1
	451	42352.5	43732.3	44600	46010.3	47024.6	47788.5	48384.5	48896.6	49480.9	49907.2	49635.7	50089.4	49830.2	49919.1	49777.1	49276.9	49001.1	48774	48081.4	47573.1	47118.6	46611.9	45977.4	45618.2	44910.9	44591.3	43728.1	43439.9	42638.5	42246.5	41512.5
	452	42667.7	44057.8	44932	46352.7	47374.6	48144.2	48744.6	49260.5	49849.1	50278.7	50005.1	50462.2	50201	50290.6	50147.5	49643.6	49365.8	49137	48439.2	47927.1	47469.3	46958.8	46319.6	45957.7	45245.1	44923.2	44053.5	43763.2	42955.8	42560.9	41821.4
	453	42571.5	43958.5	44830.7	46248.2	47267.8	48035.7	48634.8	49149.5	49736.8	50165.3	49892.4	50348.5	50087.9	50177.3	50034.5	49531.7	49254.5	49026.2	48330	47819.1	47362.3	46852.9	46215.2	45854.2	45143.1	44821.9	43954.2	43664.6	42859	42465	41727.2
	454	42541.2	43927.2	44798.7	46215.3	47234.1	48001.4	48600.1	49114.4	49701.3	50129.6	49856.9	50312.6	50052.2	50141.5	49998.8	49496.4	49219.4	48991.3	48295.6	47785	47328.5	46819.5	46182.3	45821.5	45111	44790	43922.9	43633.4	42828.5	42434.7	41697.4
	455	42387	43768	44636.4	46047.8	47062.9	47827.5	48423.9	48936.4	49521.2	49947.9	49676.2	50130.2	49870.7	49959.8	49817.6	49317.1	49041	48813.7	48120.5	47611.8	47157	46649.8	46014.9	45655.4	44947.5	44627.7	43763.7	43475.3	42673.2	42280.9	41546.3
	456	41574.3	42928.8	43780.6	45164.9	46160.6	46910.5	47495.5	47998.2	48571.7	48990.3	48723.7	49169.1	48914.6	49001.9	48862.5	48371.5	48100.8	47877.8	47197.9	46699	46252.9	45755.4	45132.7	44780.1	44085.7	43772	42924.6	42641.8	41855.1	41470.3	40749.7
	457	41434.8	42784.7	43633.6	45013.3	46005.7	46753	47336.1	47837.1	48408.7	48825.8	48560.2	49004.1	48750.4	48837.5	48698.5	48209.2	47939.4	47717.1	47039.5	46542.2	46097.6	45601.9	44981.2	44629.8	43937.7	43625.1	42780.5	42498.6	41714.6	41331.1	40613
	458	41106.4	42445.7	43287.8	44656.6	45641.1	46382.5	46961	47458	48025.1	48438.9	48175.4	48615.7	48364.1	48450.4	48312.6	47827.1	47559.4	47338.9	46666.7	46173.4	45732.3	45240.5	44624.7	44276.1	43589.5	43279.4	42441.5	42161.8	41384	41003.6	40291.1
	459	40483.7	41802.6	42632.1	43980.1	44949.7	45679.9	46249.6	46739	47297.5	47705.1	47445.6	47879.2	47631.4	47716.4	47580.7	47102.6	46839	46621.8	45959.8	45473.9	45039.5	44555.1	43948.7	43605.3	42929.2	42623.8	41798.6	41523.1	40757.1	40382.4	39680.7
	460	40160.1	41468.5	42291.3	43628.6	44590.4	45314.7	45879.9	46365.4	46919.5	47323.8	47066.3	47496.5	47250.7	47335	47200.4	46726.1	46464.6	46249.2	45592.4	45110.4	44679.5	44199	43597.4	43256.8	42586	42283	41464.5	41191.2	40431.3	40059.6	39363.6
	[nm]	A04	X4
[nm]		470	471	472	473	474	475	476	477	478	479	480	481	482	483	484	485	486	487	488	489	490	491	492	493	494	495	496	497	498	499	500
	430	57756.2	59858.8	61417.7	63548.5	65219.7	66476.1	67482.3	68317.9	69385.2	70126.6	69744.5	70503.1	70236.8	70442.3	70320.7	69636.8	69308.1	69051.8	68015.3	67476.4	66783.8	66091.9	65172.9	64658.3	63753.3	63210.6	62028.4	61677.5	60507.7	60034.3	58874.6
	431	57691.8	59792.1	61349.3	63477.7	65146.9	66402	67407	68241.8	69307.9	70048.4	69666.7	70424.5	70158.4	70363.8	70242.3	69559.2	69230.8	68974.8	67939.5	67401.2	66709.4	66018.2	65100.3	64586.2	63682.3	63140.1	61959.2	61608.7	60440.2	59967.3	58808.9
	432	58281.3	60403	61976.1	64126.2	65812.5	67080.4	68095.7	68939	70016	70764.1	70378.5	71144	70875.2	71082.7	70960	70269.9	69938.2	69679.5	68633.6	68089.8	67390.9	66692.7	65765.4	65246.1	64332.9	63785.2	62592.2	62238.2	61057.7	60580	59409.8
	433	59061.1	61211.1	62805.3	64984.2	66693.1	67977.9	69006.8	69861.4	70952.8	71710.9	71320.2	72095.9	71823.5	72033.7	71909.4	71210	70873.9	70611.8	69551.9	69000.9	68292.6	67585	66645.3	66119.1	65193.6	64638.6	63429.7	63070.9	61874.6	61390.5	60204.6
	434	60102.5	62290.5	63912.8	66130.1	67869.1	69176.6	70223.7	71093.3	72204	72975.4	72577.8	73367.2	73090.1	73304	73177.4	72465.7	72123.7	71856.9	70778.4	70217.6	69496.9	68776.8	67820.5	67285	66343.3	65778.4	64548.2	64183.1	62965.7	62473.1	61266.3
	435	61159	63385.4	65036.2	67292.6	69062.1	70392.5	71458	72342.9	73473.1	74258.1	73853.5	74656.8	74374.8	74592.5	74463.7	73739.5	73391.4	73120	72022.5	71451.9	70718.4	69985.8	69012.6	68467.7	67509.4	66934.6	65682.8	65311.3	64072.5	63571.2	62343.2
	436	61581.3	63823.1	65485.3	67757.2	69539	70878.6	71951.4	72842.5	73980.5	74770.9	74363.5	75172.3	74888.4	75107.5	74977.9	74248.7	73898.2	73624.9	72519.8	71945.2	71206.8	70469	69489.2	68940.5	67975.6	67396.8	66136.3	65762.3	64514.9	64010.2	62773.7
	437	62532.9	64809.3	66497.2	68804.2	70613.5	71973.8	73063.2	73968.1	75123.6	75926.3	75512.6	76333.9	76045.6	76268.1	76136.5	75396	75040.1	74762.6	73640.4	73057	72307.1	71557.9	70563	70005.8	69025.9	68438.3	67158.3	66778.4	65511.8	64999.3	63743.7
	438	63913.8	66240.5	67965.6	70323.6	72172.9	73563.2	74676.7	75601.5	76782.6	77602.9	77180.1	78019.6	77724.9	77952.3	77817.8	77061	76697.2	76413.5	75266.6	74670.3	73903.8	73138.1	72121.2	71551.7	70550.2	69949.6	68641.4	68253.1	66958.5	66434.7	65151.3
	439	65515.7	67900.8	69669.2	72086.2	73981.8	75407.1	76548.4	77496.4	78707.1	79548	79114.6	79975.1	79673	79906.2	79768.2	78992.4	78619.6	78328.8	77153.1	76541.8	75756.2	74971.3	73928.9	73345.1	72318.5	71702.8	70361.8	69963.8	68636.8	68099.8	66784.3
	440	65813.2	68209.1	69985.5	72413.6	74317.8	75749.5	76896	77848.3	79064.5	79909.2	79473.8	80338.2	80034.8	80269	80130.4	79351.1	78976.6	78684.5	77503.5	76889.4	76100.2	75311.7	74264.5	73678.1	72646.9	72028.4	70681.3	70281.5	68948.5	68409	67087.6
	441	67028.3	69468.4	71277.6	73750.4	75689.8	77147.9	78315.6	79285.5	80524.1	81384.5	80941.1	81821.4	81512.4	81750.9	81609.8	80816.1	80434.6	80137.1	78934.3	78308.9	77505.1	76702.1	75635.6	75038.4	73988.1	73358.2	71986.2	71579	70221.4	69672	68326.1
	442	68021.1	70497.3	72333.3	74842.8	76810.9	78290.6	79475.6	80459.9	81716.8	82589.9	82140	83033.3	82719.7	82961.8	82818.6	82013.1	81626	81324.1	80103.5	79468.8	78653.1	77838.2	76755.9	76149.8	75084	74444.7	73052.4	72639.2	71261.5	70703.9	69338.1
	443	68601	71098.4	72950	75480.9	77465.8	78958.1	80153.3	81145.9	82413.6	83294.1	82840.3	83741.3	83425	83669.1	83524.7	82712.4	82321.9	82017.5	80786.4	80146.4	79323.7	78501.9	77410.3	76799.1	75724.2	75079.5	73675.3	73258.6	71869.1	71306.8	69929.3
	444	69073.3	71587.8	73452.2	76000.5	77999.1	79501.7	80705	81704.5	82980.9	83867.5	83410.6	84317.8	83999.3	84245.1	84099.7	83281.8	82888.6	82582.1	81342.6	80698.1	79869.8	79042.3	77943.2	77327.8	76245.4	75596.3	74182.5	73762.9	72363.8	71797.6	70410.7
	445	70263	72820.9	74717.4	77309.6	79342.6	80871.1	82095.2	83111.8	84410.2	85312.1	84847.3	85770.1	85446.1	85696.2	85548.3	84716.3	84316.4	84004.5	82743.7	82088.1	81245.5	80403.8	79285.8	78659.7	77558.8	76898.4	75460.3	75033.4	73610.3	73034.3	71623.5
	446	71214.3	73806.8	75729	78356.3	80416.8	81966	83206.6	84237	85553	86467.1	85996	86931.3	86602.9	86856.4	86706.5	85863.2	85457.9	85141.8	83863.9	83199.4	82345.4	81492.3	80359.2	79724.6	78608.8	77939.5	76481.9	76049.3	74606.8	74023.1	72593.2
	447	72151.2	74777.8	76725.3	79387.1	81474.7	83044.3	84301.3	85345.2	86678.5	87604.7	87127.4	88075	87742.3	87999.1	87847.2	86992.8	86582.2	86262	84967.2	84294	83428.8	82564.4	81416.4	80773.5	79643	78964.9	77488.1	77049.8	75588.3	74997	73548.2
	448	72745.5	75393.7	77357.2	80041	82145.8	83728.3	84995.6	86048.2	87392.5	88326.2	87845	88800.5	88465	88723.9	88570.8	87709.4	87295.4	86972.5	85667.1	84988.3	84116	83244.5	82087	81438.8	80299	79615.3	78126.3	77684.4	76211	75614.7	74154
	449	73779	76464.8	78456.2	81178.2	83312.9	84917.8	86203.2	87270.7	88634.1	89581.1	89093	90062	89721.8	89984.4	89829.1	88955.4	88535.5	88208.1	86884.1	86195.7	85311	84427.1	83253.2	82595.8	81439.8	80746.4	79236.3	78788.1	77293.7	76688.9	75207.5
	450	73194	75858.6	77834.2	80534.5	82652.3	84244.5	85519.7	86578.7	87931.3	88870.8	88386.6	89347.9	89010.4	89270.9	89116.8	88250.1	87833.5	87508.7	86195.2	85512.3	84634.6	83757.7	82593.1	81940.9	80794	80106.2	78608	78163.4	76680.8	76080.9	74611.2
	451	72970.9	75627.3	77596.9	80289	82400.4	83987.8	85259	86314.8	87663.3	88599.9	88117.2	89075.6	88739.1	88998.8	88845.2	87981.1	87565.8	87242	85932.5	85251.7	84376.6	83502.4	82341.3	81691.2	80547.8	79862	78368.4	77925.1	76447.1	75849	74383.8
	452	73351.3	76021.6	78001.5	80707.6	82830	84425.6	85703.5	86764.8	88120.3	89061.8	88576.6	89540	89201.8	89462.8	89308.4	88439.8	88022.4	87696.8	86380.5	85696.1	84816.5	83937.7	82770.6	82117.1	80967.7	80278.4	78777	78331.4	76845.7	76244.4	74771.6
	453	73140.8	75803.4	77777.6	80476	82592.2	84183.3	85457.5	86515.8	87867.4	88806.2	88322.3	89283	88945.7	89206	89052	88186	87769.7	87445.1	86132.6	85450.1	84573	83696.8	82533	81881.3	80735.3	80047.9	78550.8	78106.5	76625.1	76025.6	74557
	454	73189.5	75853.9	77829.4	80529.6	82647.2	84239.4	85514.4	86573.5	87925.9	88865.4	88381.2	89342.5	89005	89265.5	89111.4	88244.7	87828.2	87503.4	86190	85507.1	84629.4	83752.6	82588.1	81935.9	80789.1	80101.3	78603.2	78158.6	76676.1	76076.2	74606.7
	455	72994.4	75651.7	77621.9	80314.9	82426.9	84014.8	85286.4	86342.6	87691.5	88628.4	88145.5	89104.3	88767.7	89027.4	88873.8	88009.4	87594	87270	85960.2	85279.1	84403.7	83529.3	82367.8	81717.4	80573.7	79887.7	78393.6	77950.2	76471.7	75873.4	74407.7
	456	71491.8	74094.4	76024.1	78661.6	80730.1	82285.4	83530.8	84565.3	85886.4	86804	86331.1	87270.1	86940.4	87194.9	87044.3	86197.8	85790.9	85473.6	84190.7	83523.7	82666.3	81809.9	80672.3	80035.3	78915.1	78243.2	76779.9	76345.6	74897.6	74311.6	72876.1
	457	71270.2	73864.7	75788.4	78417.8	80479.9	82030.3	83271.9	84303.1	85620.1	86534.9	86063.5	86999.5	86670.9	86924.5	86774.5	85930.6	85525	85208.6	83929.7	83264.7	82410	81556.2	80422.2	79787.2	78670.5	78000.7	76541.9	76108.9	74665.4	74081.2	72650.2
	458	70927.8	73509.9	75424.3	78041.1	80093.3	81636.2	82871.9	83898.2	85208.8	86119.3	85650	86581.6	86254.6	86507	86357.7	85517.8	85114.1	84799.3	83526.5	82864.7	82014.2	81164.5	80035.9	79403.9	78292.6	77626	76174.2	75743.3	74306.7	73725.3	72301.2
	459	70082.9	72634.2	74525.9	77111.5	79139.2	80663.8	81884.7	82898.8	84193.8	85093.4	84629.8	85550.3	85227.1	85476.5	85329	84499.1	84100.2	83789.2	82531.6	81877.7	81037.2	80197.6	79082.5	78458.1	77359.9	76701.3	75266.8	74841.1	73421.6	72847.1	71439.9
	460	69622.8	72157.4	74036.6	76605.2	78619.7	80134.2	81347.1	82354.5	83641.1	84534.8	84074.2	84988.6	84667.6	84915.4	84768.8	83944.4	83548.1	83239.1	81989.8	81340.1	80505.2	79671.1	78563.4	77943	76852.1	76197.8	74772.7	74349.8	72939.5	72368.9	70970.9
	[nm]	A05	X5
[nm]		470	471	472	473	474	475	476	477	478	479	480	481	482	483	484	485	486	487	488	489	490	491	492	493	494	495	496	497	498	499	500
	430	49456.1	51293.5	52558.5	54347.6	55743.2	56708.9	57614.4	58301.2	59110.6	59647.1	59346.3	59939.8	59726.5	59848.9	59726	59192.1	58717.4	58524.7	57729.9	57142.2	56569.9	56018.7	55129.6	54763.8	53959.2	53529	52452.9	52140	51181	50722.5	49808.3
	431	47787	49562.5	50784.8	52513.5	53862	54795.1	55670	56333.6	57115.7	57634.1	57343.4	57916.9	57710.8	57829.1	57710.3	57194.4	56735.8	56549.6	55781.6	55213.7	54660.8	54128.1	53269.1	52915.6	52138.2	51722.5	50682.7	50380.4	49453.7	49010.7	48127.3
	432	48400.8	50199	51437	53188	54553.8	55498.9	56385	57057.1	57849.3	58374.4	58080	58660.8	58452	58571.9	58451.5	57929	57464.5	57275.9	56498.1	55922.9	55362.9	54823.3	53953.3	53595.3	52807.8	52386.8	51333.6	51027.5	50088.9	49640.2	48745.5
	433	48913.9	50731.2	51982.3	53751.8	55132.1	56087.2	56982.7	57662	58462.5	58993.2	58695.7	59282.6	59071.7	59192.8	59071.2	58543.1	58073.7	57883.1	57097	56515.7	55949.8	55404.5	54525.2	54163.4	53367.6	52942.2	51877.8	51568.4	50619.9	50166.5	49262.2
	434	49836.3	51687.8	52962.6	54765.4	56171.7	57144.9	58057.3	58749.3	59565	60105.6	59802.5	60400.5	60185.6	60309	60185.1	59647.1	59168.8	58974.6	58173.7	57581.4	57004.8	56449.3	55553.4	55184.8	54374	53940.5	52856.1	52540.8	51574.4	51112.4	50191.2
	435	50706	52589.8	53886.8	55721.1	57152	58142.1	59070.4	59774.6	60604.4	61154.6	60846.1	61454.6	61235.9	61361.5	61235.4	60688	60201.3	60003.8	59188.9	58586.3	57999.6	57434.4	56522.9	56147.8	55322.9	54881.8	53778.5	53457.7	52474.5	52004.4	51067.1
	436	51104.7	53003.4	54310.6	56159.3	57601.5	58599.3	59535	60244.7	61081	61635.5	61324.6	61937.9	61717.5	61844	61717	61165.3	60674.8	60475.7	59654.4	59047	58455.7	57886.1	56967.4	56589.4	55757.9	55313.4	54201.4	53878.1	52887.1	52413.4	51468.7
	437	51898.7	53826.9	55154.3	57031.8	58496.3	59509.7	60459.9	61180.6	62030	62593.1	62277.3	62900.1	62676.3	62804.8	62675.8	62115.5	61617.4	61415.2	60581.2	59964.4	59363.9	58785.4	57852.4	57468.5	56624.2	56172.8	55043.5	54715.2	53708.8	53227.7	52268.3
	438	53024.5	54994.6	56350.8	58269	59765.3	60800.7	61771.5	62507.8	63375.6	63950.9	63628.4	64264.7	64036	64167.3	64035.4	63463	62954.1	62747.5	61895.4	61265.2	60651.7	60060.6	59107.4	58715.2	57852.6	57391.3	56237.5	55902.1	54873.9	54382.4	53402.1
	439	54450.2	56473.2	57865.9	59835.7	61372.2	62435.5	63432.3	64188.5	65079.6	65670.4	65339.1	65992.6	65757.7	65892.5	65757.2	65169.3	64646.8	64434.6	63559.6	62912.5	62282.4	61675.5	60696.7	60293.9	59408	58934.4	57749.6	57405.2	56349.3	55844.5	54838
	440	54722.1	56755.2	58154.9	60134.5	61678.7	62747.2	63749.1	64509	65404.6	65998.3	65665.4	66322.1	66086.1	66221.6	66085.5	65494.8	64969.6	64756.4	63877	63226.6	62593.5	61983.5	60999.8	60595	59704.7	59228.7	58038	57691.9	56630.7	56123.4	55111.8
	441	55786.9	57859.6	59286.5	61304.6	62878.9	63968.2	64989.5	65764.3	66677.2	67282.5	66943.1	67612.6	67372	67510.1	67371.4	66769.2	66233.8	66016.4	65119.9	64456.9	63811.4	63189.6	62186.7	61774.1	60866.5	60381.2	59167.3	58814.4	57732.6	57215.5	56184.2
	442	56710.6	58817.6	60268.1	62319.7	63920	65027.3	66065.6	66853.1	67781.3	68396.5	68051.6	68732.1	68487.5	68627.9	68486.9	67874.7	67330.4	67109.5	66198.1	65524.1	64868	64235.8	63216.4	62796.9	61874.3	61381	60147	59788.3	58688.5	58162.8	57114.5
	443	57131.2	59253.8	60715.1	62781.8	64394	65509.6	66555.5	67348.9	68283.9	68903.8	68556.2	69241.8	68995.4	69136.9	68994.8	68378.1	67829.8	67607.1	66689	66010.1	65349	64712.2	63685.2	63262.6	62333.1	61836.2	60593	60231.6	59123.8	58594.1	57538
	444	57659	59801.2	61276.1	63361.9	64989	66114.8	67170.5	67971.2	68914.8	69540.4	69189.6	69881.6	69632.9	69775.7	69632.3	69009.8	68456.5	68231.8	67305.2	66620	65952.8	65310.1	64273.6	63847.1	62909	62407.5	61152.9	60788.1	59670	59135.5	58069.6
	445	58713.9	60895.3	62397.1	64521.1	66178	67324.4	68399.4	69214.7	70175.6	70812.6	70455.5	71160.1	70906.8	71052.2	70906.2	70272.4	69708.9	69480.1	68536.6	67838.8	67159.4	66505	65449.5	65015.2	64060	63549.3	62271.7	61900.3	60761.7	60217.4	59132
	446	59439.8	61648.1	63168.5	65318.8	66996.1	68156.7	69245	70070.4	71043.2	71688.1	71326.5	72039.8	71783.4	71930.6	71782.8	71141.1	70570.7	70339.1	69383.9	68677.5	67989.7	67327.1	66258.6	65819	64851.9	64334.9	63041.5	62665.5	61512.9	60961.9	59863
	447	60275.4	62514.9	64056.6	66237.1	67938	69115	70218.5	71055.5	72042	72696	72329.3	73052.6	72792.7	72941.9	72792	72141.3	71562.8	71328	70359.3	69643	68945.6	68273.7	67190.2	66744.3	65763.7	65239.4	63927.8	63546.6	62377.7	61818.9	60704.7
	448	60792.6	63051.2	64606.2	66805.4	68520.9	69707.9	70820.9	71665.2	72660.1	73319.7	72949.8	73679.4	73417.2	73567.7	73416.6	72760.3	72176.8	71939.9	70963	70240.5	69537.1	68859.5	67766.6	67317	66327.9	65799.1	64476.3	64091.8	62912.9	62349.3	61225.5
	449	61762.4	64057.1	65636.9	67871.1	69614	70820	71950.8	72808.5	73819.2	74489.3	74113.6	74854.8	74588.4	74741.4	74587.8	73921	73328.3	73087.6	72095.1	71361.1	70646.4	69958	68847.7	68390.9	67386	66848.8	65504.9	65114.2	63916.6	63344	62202.2
	450	61292.9	63570.1	65137.9	67355.2	69084.8	70281.7	71403.8	72255	73258.1	73923.1	73550.2	74285.8	74021.4	74173.2	74020.8	73359.1	72770.9	72532	71547	70818.6	70109.4	69426.2	68324.4	67871	66873.8	66340.7	65007	64619.2	63430.7	62862.5	61729.4
	451	61200	63473.8	65039.2	67253.1	68980.1	70175.1	71295.6	72145.5	73147.1	73811	73438.8	74173.2	73909.2	74060.8	73908.6	73247.9	72660.5	72422.1	71438.6	70711.3	70003.1	69321	68220.8	67768.1	66772.4	66240.1	64908.4	64521.3	63334.5	62767.2	61635.8
	452	61519.1	63804.7	65378.3	67603.7	69339.7	70541	71667.3	72521.6	73528.4	74195.9	73821.6	74559.9	74294.5	74446.9	74293.9	73629.8	73039.4	72799.7	71811	71079.9	70368.1	69682.4	68576.5	68121.4	67120.6	66585.4	65246.8	64857.7	63664.7	63094.4	61957.2
	453	61420.1	63702.1	65273.1	67495	69228.2	70427.5	71552	72405	73410.2	74076.5	73702.9	74440	74175.1	74327.1	74174.4	73511.4	72921.9	72682.6	71695.5	70965.6	70254.9	69570.3	68466.2	68011.9	67012.6	66478.3	65141.9	64753.4	63562.3	62992.9	61857.5
	454	61463.6	63747.1	65319.3	67542.7	69277.2	70477.4	71602.6	72456.2	73462.1	74128.9	73755	74492.6	74227.5	74379.7	74226.9	73563.4	72973.5	72734	71746.2	71015.8	70304.6	69619.5	68514.6	68060	67060	66525.4	65188	64799.2	63607.3	63037.5	61901.3
	455	61316	63594.1	65162.4	67380.6	69110.9	70308.1	71430.7	72282.2	73285.7	73950.9	73577.9	74313.8	74049.3	74201.1	74048.7	73386.7	72798.3	72559.3	71574	70845.3	70135.8	69452.3	68350.1	67896.6	66899	66365.6	65031.4	64643.6	63454.6	62886.1	61752.6
	456	60124.5	62358.3	63896.2	66071.2	67767.9	68941.9	70042.6	70877.6	71861.6	72513.9	72148.1	72869.7	72610.3	72759.2	72609.7	71960.7	71383.6	71149.3	70183.1	69468.6	68772.9	68102.7	67021.9	66577.2	65599	65076	63767.7	63387.4	62221.5	61664.1	60552.6
	457	60077.7	62309.7	63846.4	66019.8	67715.1	68888.2	69988.1	70822.4	71805.6	72457.4	72092	72812.9	72553.8	72702.6	72553.2	71904.6	71328	71093.9	70128.5	69414.5	68719.4	68049.7	66969.7	66525.3	65547.9	65025.3	63718.1	63338	62173.1	61616.1	60505.5
	458	59858.6	62082.5	63613.6	65779	67468.1	68637	69732.9	70564.1	71543.7	72193.2	71829	72547.4	72289.2	72437.4	72288.6	71642.4	71067.9	70834.7	69872.7	69161.3	68468.7	67801.5	66725.5	66282.7	65308.8	64788.2	63485.7	63107.1	61946.3	61391.4	60284.8
	459	59041.8	61235.3	62745.5	64881.4	66547.5	67700.4	68781.3	69601.2	70567.5	71208.1	70848.9	71557.4	71302.8	71449	71302.2	70664.8	70098.1	69868.1	68919.3	68217.6	67534.4	66876.3	65814.9	65378.2	64417.7	63904.1	62619.4	62245.9	61101	60553.7	59462.2
	460	58739.3	60921.6	62424.1	64549	66206.6	67353.5	68428.9	69244.6	70205.9	70843.2	70485.9	71190.8	70937.5	71082.9	70936.9	70302.8	69739	69510.1	68566.2	67868.1	67188.5	66533.7	65477.8	65043.3	64087.6	63576.7	62298.6	61927	60788	60243.4	59157.6
	[nm]	A06	X6
[nm]		470	471	472	473	474	475	476	477	478	479	480	481	482	483	484	485	486	487	488	489	490	491	492	493	494	495	496	497	498	499	500
	430	4288.27	4374.09	4424.58	4501.69	4567.37	4604.89	4637.97	4663.62	4703.88	4737.3	4690.66	4730.03	4717.24	4719.26	4712.76	4670.63	4648.08	4630.1	4564.7	4544.47	4518.29	4470.81	4435.68	4399.72	4363.08	4341.07	4270.96	4258.46	4190.77	4149.73	4099.52
	431	4271.09	4356.57	4406.86	4483.66	4549.07	4586.44	4619.39	4644.94	4685.04	4718.32	4671.87	4711.09	4698.34	4700.35	4693.88	4651.92	4629.46	4611.55	4546.41	4526.26	4500.19	4452.9	4417.91	4382.09	4345.6	4323.68	4253.85	4241.4	4173.98	4133.1	4083.1
	432	4291.41	4377.3	4427.83	4504.99	4570.72	4608.27	4641.37	4667.05	4707.34	4740.77	4694.1	4733.5	4720.7	4722.72	4716.22	4674.05	4651.49	4633.49	4568.05	4547.8	4521.6	4474.09	4438.94	4402.95	4366.28	4344.26	4274.09	4261.58	4193.85	4152.77	4102.53
	433	4330.83	4417.51	4468.5	4546.37	4612.71	4650.59	4684.01	4709.91	4750.57	4784.32	4737.21	4776.98	4764.06	4766.1	4759.54	4716.99	4694.22	4676.05	4610.01	4589.57	4563.13	4515.19	4479.71	4443.39	4406.39	4384.16	4313.35	4300.73	4232.37	4190.92	4140.21
	434	4372.84	4460.36	4511.85	4590.47	4657.45	4695.71	4729.44	4755.6	4796.65	4830.73	4783.17	4823.32	4810.27	4812.33	4805.71	4762.74	4739.75	4721.41	4654.72	4634.09	4607.4	4558.99	4523.16	4486.49	4449.13	4426.69	4355.19	4342.44	4273.42	4231.57	4180.37
	435	4427.47	4516.09	4568.21	4647.82	4715.64	4754.37	4788.53	4815.01	4856.58	4891.08	4842.92	4883.58	4870.37	4872.45	4865.75	4822.24	4798.97	4780.4	4712.88	4691.99	4664.96	4615.94	4579.67	4542.54	4504.72	4481.99	4409.6	4396.7	4326.81	4284.44	4232.6
	436	4427.96	4516.59	4568.72	4648.34	4716.16	4754.9	4789.06	4815.55	4857.12	4891.62	4843.46	4884.12	4870.91	4872.99	4866.29	4822.78	4799.5	4780.93	4713.4	4692.51	4665.48	4616.46	4580.18	4543.04	4505.22	4482.49	4410.09	4397.19	4327.29	4284.91	4233.07
	437	4460.34	4549.61	4602.12	4682.32	4750.64	4789.66	4824.07	4850.75	4892.63	4927.38	4878.87	4919.83	4906.52	4908.62	4901.87	4858.04	4834.59	4815.88	4747.86	4726.82	4699.59	4650.21	4613.67	4576.26	4538.15	4515.26	4442.33	4429.33	4358.93	4316.24	4264.01
	438	4509.2	4599.45	4652.55	4733.62	4802.69	4842.14	4876.93	4903.9	4946.23	4981.37	4932.33	4973.73	4960.28	4962.4	4955.57	4911.26	4887.56	4868.64	4799.88	4778.61	4751.08	4701.16	4664.22	4626.4	4587.88	4564.73	4491.01	4477.86	4406.69	4363.53	4310.73
	439	4586.57	4678.36	4732.37	4814.84	4885.09	4925.21	4960.6	4988.04	5031.1	5066.83	5016.95	5059.06	5045.38	5047.54	5040.59	4995.52	4971.41	4952.17	4882.23	4860.59	4832.59	4781.81	4744.24	4705.77	4666.59	4643.05	4568.06	4554.69	4482.29	4438.39	4384.69
	440	4554.49	4645.64	4699.27	4781.16	4850.92	4890.76	4925.9	4953.15	4995.9	5031.39	4981.86	5023.68	5010.09	5012.23	5005.34	4960.58	4936.64	4917.54	4848.08	4826.59	4798.79	4748.36	4711.05	4672.86	4633.95	4610.57	4536.1	4522.83	4450.94	4407.35	4354.02
	441	4597.47	4689.48	4743.62	4826.28	4896.7	4936.92	4972.39	4999.89	5043.05	5078.88	5028.87	5071.09	5057.37	5059.54	5052.57	5007.4	4983.23	4963.94	4893.83	4872.14	4844.07	4793.18	4755.51	4716.96	4677.68	4654.08	4578.91	4565.51	4492.94	4448.94	4395.11
	442	4607.82	4700.04	4754.29	4837.15	4907.72	4948.03	4983.58	5011.15	5054.41	5090.31	5040.19	5082.51	5068.76	5070.93	5063.95	5018.67	4994.45	4975.12	4904.85	4883.11	4854.98	4803.97	4766.22	4727.57	4688.21	4664.56	4589.22	4575.79	4503.06	4458.96	4405.01
	443	4581.28	4672.98	4726.92	4809.29	4879.46	4919.54	4954.88	4982.29	5025.3	5061	5011.17	5053.24	5039.57	5041.72	5034.79	4989.77	4965.69	4946.47	4876.61	4854.99	4827.02	4776.3	4738.77	4700.35	4661.21	4637.7	4562.8	4549.44	4477.13	4433.28	4379.64
	444	4556.57	4647.77	4701.42	4783.35	4853.14	4893	4928.16	4955.42	4998.19	5033.7	4984.14	5025.98	5012.38	5014.53	5007.63	4962.86	4938.9	4919.79	4850.3	4828.8	4800.98	4750.54	4713.21	4675	4636.07	4612.68	4538.18	4524.9	4452.98	4409.37	4356.01
	445	4568.31	4659.74	4713.53	4795.67	4865.64	4905.61	4940.85	4968.18	5011.07	5046.66	4996.98	5038.92	5025.29	5027.44	5020.53	4975.64	4951.62	4932.46	4862.79	4841.24	4813.35	4762.77	4725.35	4687.04	4648.01	4624.56	4549.87	4536.55	4464.45	4420.72	4367.23
	446	4550.34	4641.41	4694.99	4776.81	4846.5	4886.31	4921.42	4948.64	4991.36	5026.81	4977.32	5019.1	5005.53	5007.67	5000.78	4956.07	4932.14	4913.06	4843.67	4822.2	4794.42	4744.04	4706.77	4668.6	4629.73	4606.37	4531.98	4518.71	4446.89	4403.33	4350.06
	447	4546.25	4637.24	4690.77	4772.52	4842.15	4881.92	4916.99	4944.19	4986.87	5022.3	4972.85	5014.6	5001.03	5003.17	4996.29	4951.61	4927.71	4908.65	4839.32	4817.87	4790.11	4739.78	4702.54	4664.41	4625.57	4602.23	4527.9	4514.65	4442.89	4399.38	4346.15
	448	4498.08	4588.1	4641.06	4721.94	4790.84	4830.19	4864.89	4891.8	4934.03	4969.08	4920.15	4961.46	4948.04	4950.15	4943.34	4899.14	4875.5	4856.63	4788.04	4766.81	4739.35	4689.55	4652.71	4614.98	4576.55	4553.47	4479.92	4466.81	4395.81	4352.76	4300.09
	449	4483.47	4573.2	4625.99	4706.61	4775.28	4814.5	4849.09	4875.91	4918	4952.94	4904.17	4945.34	4931.97	4934.08	4927.29	4883.23	4859.66	4840.86	4772.48	4751.33	4723.96	4674.32	4637.6	4599.99	4561.69	4538.68	4465.37	4452.3	4381.53	4338.62	4286.13
	450	4362.92	4450.24	4501.61	4580.05	4646.88	4685.05	4718.71	4744.81	4785.77	4819.76	4772.31	4812.37	4799.35	4801.41	4794.8	4751.93	4728.99	4710.69	4644.16	4623.58	4596.94	4548.64	4512.9	4476.31	4439.03	4416.64	4345.31	4332.59	4263.72	4221.96	4170.88
	451	4265.68	4351.06	4401.28	4477.98	4543.32	4580.64	4613.55	4639.06	4679.11	4712.35	4665.95	4705.12	4692.39	4694.4	4687.94	4646.03	4623.6	4605.71	4540.66	4520.53	4494.49	4447.27	4412.32	4376.55	4340.11	4318.21	4248.47	4236.03	4168.7	4127.87	4077.93
	452	4190.4	4274.27	4323.6	4398.95	4463.13	4499.79	4532.12	4557.19	4596.53	4629.18	4583.61	4622.08	4609.58	4611.55	4605.21	4564.03	4542	4524.43	4460.52	4440.75	4415.17	4368.78	4334.45	4299.31	4263.51	4242	4173.49	4161.27	4095.13	4055.02	4005.96
	453	4084.21	4165.96	4214.04	4287.48	4350.04	4385.77	4417.28	4441.71	4480.05	4511.88	4467.46	4504.96	4492.77	4494.69	4488.51	4448.38	4426.91	4409.78	4347.49	4328.22	4303.29	4258.07	4224.62	4190.36	4155.47	4134.51	4067.73	4055.82	3991.36	3952.27	3904.45
	454	4003.57	4083.7	4130.83	4202.82	4264.14	4299.17	4330.05	4354	4391.59	4422.79	4379.24	4416	4404.06	4405.94	4399.88	4360.54	4339.49	4322.7	4261.65	4242.76	4218.32	4173.99	4141.2	4107.62	4073.42	4052.87	3987.41	3975.74	3912.55	3874.23	3827.35
	455	3887.93	3965.75	4011.53	4081.43	4140.98	4175	4204.99	4228.25	4264.75	4295.05	4252.76	4288.46	4276.86	4278.69	4272.8	4234.6	4214.16	4197.85	4138.56	4120.22	4096.48	4053.44	4021.59	3988.98	3955.77	3935.81	3872.24	3860.91	3799.54	3762.33	3716.81
	456	3723.08	3797.59	3841.43	3908.37	3965.4	3997.97	4026.69	4048.96	4083.92	4112.93	4072.43	4106.62	4095.51	4097.26	4091.63	4055.04	4035.47	4019.85	3963.08	3945.51	3922.78	3881.57	3851.07	3819.84	3788.03	3768.92	3708.05	3697.2	3638.43	3602.8	3559.21
	457	3636.55	3709.33	3752.15	3817.53	3873.23	3905.05	3933.1	3954.86	3989	4017.33	3977.78	4011.17	4000.32	4002.03	3996.53	3960.79	3941.68	3926.42	3870.97	3853.81	3831.61	3791.35	3761.56	3731.06	3699.99	3681.33	3621.87	3611.27	3553.87	3519.06	3476.48
	458	3533.78	3604.51	3646.12	3709.66	3763.78	3794.7	3821.96	3843.1	3876.28	3903.81	3865.38	3897.83	3887.28	3888.95	3883.59	3848.87	3830.29	3815.47	3761.58	3744.91	3723.33	3684.21	3655.26	3625.63	3595.44	3577.3	3519.52	3509.22	3453.44	3419.62	3378.24
	459	3405.24	3473.39	3513.49	3574.72	3626.87	3656.66	3682.93	3703.31	3735.27	3761.81	3724.77	3756.04	3745.88	3747.48	3742.33	3708.87	3690.96	3676.68	3624.75	3608.69	3587.9	3550.2	3522.3	3493.74	3464.65	3447.17	3391.5	3381.57	3327.82	3295.23	3255.36
	460	3309.11	3375.34	3414.3	3473.8	3524.48	3553.44	3578.96	3598.76	3629.83	3655.61	3619.62	3650.01	3640.13	3641.69	3636.68	3604.16	3586.77	3572.89	3522.42	3506.81	3486.61	3449.97	3422.87	3395.11	3366.84	3349.86	3295.75	3286.11	3233.88	3202.2	3163.46
	[nm]	A07	X7
[nm]		470	471	472	473	474	475	476	477	478	479	480	481	482	483	484	485	486	487	488	489	490	491	492	493	494	495	496	497	498	499	500
	430	49174.9	50937.2	52248	53997.2	55491.3	56461.8	57271	57958.3	58806.2	59368.3	59054.2	59709.1	59458.4	59608.8	59453.1	58864.3	58511.3	58239.4	57398.6	56828.5	56380.8	55710.8	54923.6	54566.3	53839.6	53418.3	52339	51964.4	51027.1	50501.6	49654.1
	431	50175.5	51973.6	53311.1	55095.9	56620.4	57610.6	58436.3	59137.6	60002.8	60576.2	60255.8	60924	60668.2	60821.7	60662.9	60062.1	59701.9	59424.4	58566.5	57984.8	57528	56844.4	56041.1	55676.6	54935.1	54505.2	53403.9	53021.8	52065.4	51529.1	50664.4
	432	51672.4	53524.2	54901.6	56739.6	58309.6	59329.4	60179.7	60901.9	61792.9	62383.5	62053.5	62741.6	62478.2	62636.2	62472.7	61854	61483	61197.2	60313.8	59714.7	59244.3	58540.3	57713.1	57337.6	56574.1	56131.3	54997.2	54603.6	53618.7	53066.5	52175.9
	433	52179	54049	55439.8	57295.9	58881.3	59911.1	60769.8	61499.1	62398.7	62995.1	62661.9	63356.8	63090.7	63250.3	63085.2	62460.4	62085.8	61797.3	60905.1	60300.2	59825.1	59114.2	58278.9	57899.8	57128.7	56681.7	55536.4	55139	54144.4	53586.8	52687.5
	434	53159.8	55064.8	56481.9	58372.8	59988	61037.1	61911.9	62655	63571.5	64179.1	63839.6	64547.6	64276.5	64439.1	64270.9	63634.4	63252.8	62958.8	62049.9	61433.5	60949.6	60225.3	59374.3	58988.1	58202.5	57747	56580.2	56175.3	55162.1	54593.9	53677.8
	435	53980.4	55914.8	57353.7	59273.9	60914	61979.3	62867.7	63622.1	64552.9	65169.8	64825.1	65544	65268.7	65433.9	65263	64616.7	64229.2	63930.6	63007.7	62381.9	61890.4	61155	60290.8	59898.6	59100.9	58638.4	57453.6	57042.5	56013.6	55436.7	54506.4
	436	54272.8	56217.7	57664.4	59595	61244	62315.1	63208.2	63966.8	64902.6	65522.9	65176.3	65899.1	65622.3	65788.3	65616.6	64966.7	64577.1	64277	63349	62719.8	62225.7	61486.3	60617.4	60223.1	59421.1	58956.1	57764.9	57351.5	56317	55737	54801.6
	437	55131.4	57107.1	58576.7	60537.8	62212.9	63300.9	64208.2	64978.7	65929.3	66559.5	66207.3	66941.6	66660.5	66829.1	66654.6	65994.5	65598.7	65293.8	64351.2	63712	63210.1	62459	61576.4	61175.8	60361.1	59888.8	58678.7	58258.8	57208	56618.7	55668.6
	438	56308.4	58326.3	59827.3	61830.2	63541.1	64652.4	65579	66366	67336.9	67980.5	67620.8	68370.7	68083.6	68255.9	68077.7	67403.4	66999.2	66687.8	65725.1	65072.2	64559.6	63792.4	62891	62481.9	61649.8	61167.4	59931.5	59502.6	58429.3	57827.5	56857.1
	439	57759	59828.9	61368.5	63423.1	65178	66317.9	67268.4	68075.7	69071.6	69731.8	69362.9	70132.1	69837.6	70014.3	69831.5	69139.9	68725.2	68405.8	67418.3	66748.6	66222.8	65435.8	64511.2	64091.6	63238	62743.1	61475.4	61035.5	59934.6	59317.3	58321.8
	440	58166.9	60251.3	61801.8	63870.9	65638.2	66786.2	67743.4	68556.4	69559.3	70224.1	69852.6	70627.3	70330.7	70508.6	70324.5	69628.1	69210.5	68888.8	67894.3	67219.9	66690.4	65897.9	64966.7	64544.1	63684.6	63186.2	61909.5	61466.5	60357.8	59736.1	58733.6
	441	59201.6	61323.2	62901.3	65007.2	66805.9	67974.3	68948.5	69776	70796.7	71473.4	71095.3	71883.7	71581.9	71763	71575.6	70866.7	70441.7	70114.3	69102.1	68415.7	67876.8	67070.2	66122.5	65692.3	64817.5	64310.2	63010.8	62559.9	61431.5	60798.8	59778.5
	442	60110.8	62265	63867.3	66005.5	67831.9	69018.2	70007.4	70847.6	71884	72571.1	72187.2	72987.7	72681.2	72865.1	72674.8	71955.1	71523.6	71191.1	70163.4	69466.5	68919.2	68100.2	67137.9	66701.2	65812.9	65297.9	63978.5	63520.7	62375	61732.5	60696.5
	443	60574	62744.8	64359.5	66514.2	68354.6	69550.1	70546.9	71393.5	72438	73130.3	72743.4	73550.1	73241.3	73426.6	73234.9	72509.6	72074.7	71739.7	70704	70001.8	69450.3	68625	67655.3	67215.2	66320.1	65801.1	64471.5	64010.2	62855.6	62208.2	61164.3
	444	61086.3	63275.5	64903.8	67076.7	68932.7	70138.3	71143.5	71997.3	73050.6	73748.8	73358.6	74172.2	73860.7	74047.6	73854.2	73122.8	72684.3	72346.4	71302	70593.8	70037.7	69205.4	68227.5	67783.7	66881	66357.6	65016.8	64551.5	63387.2	62734.3	61681.6
	445	62165.5	64393.2	66050.3	68261.6	70150.4	71377.3	72400.3	73269.2	74341.1	75051.6	74654.6	75482.5	75165.5	75355.7	75158.9	74414.6	73968.3	73624.5	72561.6	71840.9	71274.9	70427.9	69432.8	68981.1	68062.5	67529.8	66165.4	65691.9	64507	63842.6	62771.2
	446	63055.9	65315.6	66996.4	69239.4	71155.3	72399.7	73437.4	74318.7	75405.9	76126.6	75723.9	76563.7	76242.2	76435	76235.5	75480.5	75027.8	74679.1	73601	72869.9	72295.9	71436.7	70427.3	69969.2	69037.4	68497.1	67113.1	66632.8	65431	64757.1	63670.3
	447	63906.9	66197.1	67900.7	70173.9	72115.6	73376.9	74428.5	75321.8	76423.6	77154.1	76745.9	77597	77271.2	77466.7	77264.4	76499.2	76040.4	75687	74594.3	73853.4	73271.6	72400.9	71377.8	70913.5	69969.2	69421.6	68018.9	67532.2	66314.1	65631.1	64529.7
	448	64454.3	66764.1	68482.2	70774.9	72733.3	74005.3	75066	75966.9	77078.2	77814.9	77403.3	78261.6	77933	78130.2	77926.2	77154.4	76691.7	76335.2	75233.2	74486	73899.2	73021	71989.2	71520.9	70568.4	70016.2	68601.5	68110.6	66882	66193.2	65082.3
	449	65431.4	67776.3	69520.4	71847.9	73835.9	75127.3	76204	77118.5	78246.7	78994.6	78576.7	79448.1	79114.5	79314.6	79107.5	78324.1	77854.3	77492.5	76373.8	75615.2	75019.5	74128	73080.6	72605.2	71638.3	71077.6	69641.5	69143.1	67896	67196.7	66069
	450	64876.5	67201.5	68930.8	71238.6	73209.7	74490.1	75557.7	76464.5	77583.1	78324.6	77910.3	78774.3	78443.5	78642	78436.6	77659.8	77194.1	76835.3	75726.1	74973.9	74383.3	73499.3	72460.8	71989.4	71030.7	70474.8	69050.9	68556.7	67320.2	66626.8	65508.7
	451	64829.4	67152.6	68880.7	71186.8	73156.5	74436	75502.8	76408.9	77526.7	78267.7	77853.7	78717	78386.5	78584.8	78379.6	77603.4	77138	76779.4	75671	74919.4	74329.2	73445.9	72408.1	71937.1	70979.1	70423.6	69000.7	68506.9	67271.2	66578.4	65461.1
	452	65198.5	67535	69272.9	71592.1	73573.1	74859.8	75932.7	76844	77968.1	78713.3	78296.9	79165.3	78832.8	79032.2	78825.9	78045.2	77577.2	77216.6	76101.9	75346	74752.4	73864.1	72820.4	72346.7	71383.2	70824.6	69393.6	68897	67654.3	66957.5	65833.8
	453	65049.9	67381.1	69115	71428.9	73405.4	74689.2	75759.7	76668.9	77790.4	78533.9	78118.5	78984.8	78653.1	78852.1	78646.2	77867.4	77400.4	77040.6	75928.4	75174.3	74582	73695.7	72654.4	72181.8	71220.5	70663.2	69235.4	68739.9	67500.1	66804.8	65683.7
	454	65093.7	67426.4	69161.6	71477.1	73454.8	74739.5	75810.7	76720.5	77842.8	78586.8	78171.1	79038	78706.1	78905.2	78699.2	77919.8	77452.5	77092.5	75979.6	75224.9	74632.3	73745.4	72703.3	72230.4	71268.5	70710.8	69282	68786.3	67545.5	66849.8	65728
	455	64837.9	67161.5	68889.8	71196.2	73166.2	74445.8	75512.8	76419	77536.9	78278	77863.9	78727.4	78396.8	78595.1	78389.9	77613.6	77148.1	76789.5	75681	74929.3	74339	73455.6	72417.6	71946.6	70988.4	70432.9	69009.8	68515.9	67280.1	66587.1	65469.7
	456	63633.2	65913.6	67609.8	69873.4	71806.8	73062.6	74109.8	74999.2	76096.3	76823.6	76417.2	77264.7	76940.2	77134.9	76933.5	76171.6	75714.7	75362.8	74274.9	73537.1	72957.8	72090.8	71072.1	70609.8	69669.5	69124.3	67727.6	67242.9	66030.1	65350	64253.3
	457	63464.5	65738.9	67430.6	69688.1	71616.4	72868.9	73913.3	74800.3	75894.6	76620	76214.6	77059.9	76736.3	76930.4	76729.5	75969.6	75514	75163	74077.9	73342.2	72764.4	71899.7	70883.7	70422.6	69484.8	68941	67548	67064.7	65855	65176.7	64082.9
	458	63304.8	65573.4	67260.8	69512.7	71436.1	72685.4	73727.2	74612	75703.5	76427.1	76022.8	76865.8	76543.1	76736.7	76536.4	75778.4	75323.9	74973.8	73891.4	73157.5	72581.2	71718.7	70705.3	70245.3	69309.8	68767.4	67378	66895.8	65689.2	65012.6	63921.6
	459	62409.6	64646.1	66309.7	68529.7	70425.9	71657.6	72684.6	73556.9	74633	75346.3	74947.7	75778.9	75460.7	75651.6	75454.1	74706.8	74258.8	73913.6	72846.6	72123	71554.8	70704.5	69705.4	69252	68329.8	67795	66425.2	65949.9	64760.3	64093.3	63017.7
	460	62014.5	64236.9	65890	68095.9	69980.1	71204	72224.5	73091.3	74160.6	74869.4	74473.3	75299.2	74983	75172.7	74976.4	74233.9	73788.7	73445.7	72385.4	71666.5	71101.9	70256.9	69264.2	68813.6	67897.2	67365.9	66004.7	65532.4	64350.4	63687.6	62618.8
	[nm]	A08	X8
[nm]		470	471	472	473	474	475	476	477	478	479	480	481	482	483	484	485	486	487	488	489	490	491	492	493	494	495	496	497	498	499	500
	430	56125.9	58204.7	59707	61808.9	63489.4	64677.8	65707.3	66518.3	67599.8	68242.1	67928.4	68679.6	68436.1	68559.4	68488.6	67786.2	67407.6	67179.8	66222.4	65562	64977.2	64276.2	63411.1	62901.7	62023.3	61517.1	60276.1	59920.9	58815.2	58250.7	57258.8
	431	56029.6	58104.8	59604.6	61702.9	63380.5	64566.8	65594.6	66404.2	67483.8	68125.1	67811.9	68561.8	68318.7	68441.8	68371.1	67669.9	67292	67064.5	66108.8	65449.5	64865.8	64165.9	63302.3	62793.8	61916.9	61411.5	60172.7	59818.1	58714.3	58150.8	57160.6
	432	56659	58757.5	60274.1	62396	64092.5	65292.1	66331.5	67150.1	68241.9	68890.3	68573.6	69331.9	69086.1	69210.6	69139.1	68430.1	68047.9	67817.9	66851.4	66184.7	65594.4	64886.7	64013.4	63499.2	62612.5	62101.4	60848.6	60490	59373.9	58804	57802.7
	433	57318.7	59441.6	60975.9	63122.5	64838.7	66052.3	67103.8	67932	69036.5	69692.4	69372	70139.2	69890.5	70016.4	69944.1	69226.8	68840.2	68607.5	67629.8	66955.3	66358.1	65642.2	64758.7	64238.5	63341.5	62824.4	61557.1	61194.3	60065.2	59488.7	58475.7
	434	58315.4	60475.3	62036.3	64220.2	65966.3	67201	68270.7	69113.3	70237	70904.4	70578.4	71358.9	71105.9	71234	71160.4	70430.7	70037.3	69800.6	68805.8	68119.6	67512.1	66783.7	65884.9	65355.6	64443	63917	62627.5	62258.5	61109.7	60523.2	59492.6
	435	59381.6	61581	63170.5	65394.3	67172.3	68429.6	69518.9	70376.9	71521.1	72200.7	71868.8	72663.5	72405.9	72536.4	72461.5	71718.3	71317.8	71076.7	70063.8	69365	68746.4	68004.7	67089.4	66550.5	65621.2	65085.5	63772.5	63396.8	62227	61629.7	60580.3
	436	59779.5	61993.6	63593.8	65832.5	67622.4	68888.1	69984.7	70848.5	72000.4	72684.5	72350.3	73150.4	72891.1	73022.4	72947	72198.9	71795.7	71553	70533.3	69829.9	69207.1	68460.4	67539	66996.4	66060.9	65521.7	64199.9	63821.6	62643.9	62042.7	60986.2
	437	60670	62917.1	64541	66813.1	68629.7	69914.2	71027.2	71903.8	73072.9	73767.2	73428.1	74240.1	73976.9	74110.2	74033.6	73274.4	72865.1	72618.8	71583.9	70870	70238	69480.1	68545	67994.4	67044.9	66497.7	65156.2	64772.2	63577.1	62966.9	61894.6
	438	61906.5	64199.4	65856.5	68174.8	70028.5	71339.2	72474.8	73369.3	74562.2	75270.7	74924.6	75753.2	75484.6	75620.6	75542.5	74767.8	74350.2	74098.9	73042.9	72314.4	71669.5	70896.2	69942	69380.2	68411.4	67853	66484.1	66092.4	64872.9	64250.2	63156.1
	439	63429.8	65779.2	67477	69852.4	71751.7	73094.6	74258.2	75174.7	76396.9	77122.8	76768.3	77617.2	77342.1	77481.4	77401.4	76607.6	76179.7	75922.3	74840.3	74093.9	73433.1	72640.8	71663.1	71087.4	70094.8	69522.6	68120.1	67718.7	66469.2	65831.2	64710.2
	440	63836.6	66201	67909.7	70300.4	72211.8	73563.4	74734.4	75656.8	76886.9	77617.4	77260.6	78115	77838.1	77978.3	77897.8	77098.9	76668.3	76409.1	75320.2	74569	73904	73106.6	72122.7	71543.3	70544.3	69968.5	68557	68153	66895.5	66253.4	65125.2
	441	64950.4	67356.1	69094.6	71527	73471.8	74846.9	76038.4	76976.9	78228.4	78971.7	78608.7	79478	79196.2	79338.9	79256.9	78444.1	78006	77742.4	76634.4	75870.1	75193.5	74382.2	73381.1	72791.6	71775.2	71189.3	69753.2	69342.1	68062.7	67409.4	66261.5
	442	65847.5	68286.4	70048.9	72514.9	74486.5	75880.7	77088.6	78040	79308.9	80062.4	79694.4	80575.7	80290	80434.7	80351.6	79527.6	79083.4	78816.1	77692.8	76918	76232	75409.5	74394.6	73797	72766.5	72172.5	70716.6	70299.9	69002.7	68340.4	67176.7
	443	66289.3	68744.5	70518.9	73001.4	74986.3	76389.8	77605.8	78563.6	79841	80599.6	80229	81116.3	80828.7	80974.3	80890.7	80061.1	79614	79344.9	78214.1	77434.1	76743.5	75915.5	74893.7	74292.1	73254.7	72656.7	71191	70771.5	69465.6	68798.9	67627.4
	444	66867.3	69344	71133.8	73638	75640.2	77055.9	78282.5	79248.7	80537.2	81302.4	80928.6	81823.6	81533.5	81680.4	81596	80759.3	80308.2	80036.8	78896.1	78109.3	77412.7	76577.5	75546.8	74939.9	73893.5	73290.3	71811.8	71388.6	70071.4	69398.9	68217.1
	445	67932.7	70448.9	72267.2	74811.3	76845.4	78283.7	79529.8	80511.4	81820.4	82597.8	82218.1	83127.3	82832.6	82981.9	82896.1	82046	81587.8	81312	80153.2	79353.9	78646.1	77797.6	76750.5	76134	75070.9	74458.1	72956	72526.1	71187.9	70504.6	69304
	446	68748.8	71295.2	73135.4	75710	77768.5	79224.1	80485.2	81478.6	82803.3	83590.1	83205.8	84126	83827.7	83978.7	83892	83031.7	82567.9	82288.8	81116.1	80307.2	79590.9	78732.2	77672.5	77048.6	75972.7	75352.6	73832.4	73397.4	72043.1	71351.6	70136.6
	447	69685.3	72266.3	74131.6	76741.3	78827.8	80303.2	81581.5	82588.4	83931.2	84728.7	84339.2	85271.8	84969.5	85122.6	85034.7	84162.6	83692.6	83409.7	82221	81401	80675	79804.6	78730.5	78098.1	77007.5	76378.9	74838.1	74397.1	73024.4	72323.5	71091.9
	448	70175.6	72774.8	74653.2	77281.3	79382.5	80868.3	82155.6	83169.6	84521.8	85324.9	84932.7	85871.9	85567.5	85721.6	85633.1	84754.9	84281.5	83996.6	82799.6	81973.8	81242.7	80366.2	79284.5	78647.6	77549.4	76916.4	75364.7	74920.6	73538.2	72832.4	71592.2
	449	71220.9	73858.8	75765.1	78432.3	80564.9	82072.8	83379.3	84408.3	85780.7	86595.8	86197.7	87150.9	86841.9	86998.4	86908.5	86017.3	85536.8	85247.7	84032.8	83194.8	82452.8	81563.2	80465.4	79819	78704.5	78062	76487.3	76036.5	74633.5	73917.2	72658.5
	450	70606.8	73222	75111.9	77756.1	79870.3	81365.2	82660.4	83680.6	85041.1	85849.2	85454.5	86399.5	86093.2	86248.3	86159.2	85275.6	84799.4	84512.7	83308.3	82477.5	81741.9	80860	79771.7	79130.9	78025.9	77389	75827.8	75381	73990.1	73279.9	72032.1
	451	70428.3	73036.8	74922	77559.5	79668.3	81159.4	82451.4	83469	84826.1	85632.1	85238.4	86181	85875.5	86030.2	85941.3	85060	84584.9	84299	83097.6	82268.9	81535.2	80655.5	79570	78930.8	77828.6	77193.3	75636	75190.3	73803	73094.6	71849.9
	452	70783.2	73404.9	75299.6	77950.4	80069.8	81568.5	82866.9	83889.7	85253.6	86063.7	85668	86615.4	86308.3	86463.8	86374.5	85488.7	85011.2	84723.9	83516.5	82683.6	81946.1	81062	79971	79328.6	78220.8	77582.3	76017.2	75569.3	74174.9	73463	72212
	453	70582.8	73197.1	75086.4	77729.7	79843.1	81337.5	82632.3	83652.2	85012.3	85820	85425.5	86370.2	86064	86219	86130	85246.7	84770.6	84484	83280	82449.5	81714.2	80832.5	79744.6	79104	77999.4	77362.7	75802.1	75355.4	73965	73255.1	72007.6
	454	70562.6	73176.1	75064.9	77707.4	79820.2	81314.2	82608.6	83628.2	84987.9	85795.4	85401	86345.4	86039.3	86194.3	86105.3	85222.2	84746.2	84459.8	83256.1	82425.8	81690.7	80809.3	79721.7	79081.3	77977	77340.5	75780.3	75333.8	73943.7	73234	71986.9
	455	70303	72906.9	74788.7	77421.6	79526.6	81015.1	82304.7	83320.5	84675.2	85479.8	85086.8	86027.7	85722.8	85877.2	85788.5	84908.7	84434.5	84149.1	82949.9	82122.6	81390.2	80512.1	79428.4	78790.4	77690.2	77056	75501.5	75056.6	73671.7	72964.6	71722.1
	456	68941.7	71495.1	73340.5	75922.4	77986.6	79446.3	80711	81707.1	83035.6	83824.6	83439.2	84361.9	84062.8	84214.3	84127.3	83264.5	82799.5	82519.6	81343.6	80532.4	79814.2	78953	77890.4	77264.7	76185.8	75563.9	74039.5	73603.2	72245.1	71551.7	70333.3
	457	68817	71365.9	73207.9	75785.1	77845.6	79302.6	80565	81559.4	82885.4	83673	83288.3	84209.4	83910.8	84062	83975.2	83114	82649.8	82370.4	81196.5	80386.8	79669.8	78810.3	77749.5	77125	76048	75427.3	73905.6	73470.1	72114.5	71422.4	70206.1
	458	68593.9	71134.5	72970.5	75539.4	77593.2	79045.5	80303.8	81294.9	82616.7	83401.7	83018.3	83936.3	83638.8	83789.4	83702.9	82844.5	82381.8	82103.4	80933.3	80126.1	79411.5	78554.7	77497.5	76874.9	75801.5	75182.7	73666	73231.9	71880.7	71190.8	69978.5
	459	67642.6	70148	71958.6	74491.8	76517.2	77949.3	79190.2	80167.6	81471	82245.1	81867	82772.3	82478.9	82627.5	82542.1	81695.6	81239.4	80964.8	79810.9	79015	78310.3	77465.3	76422.7	75808.8	74750.2	74140.1	72644.4	72216.4	70883.9	70203.5	69008
	460	67331.7	69825.6	71627.8	74149.4	76165.5	77591	78826.2	79799.1	81096.5	81867.1	81490.7	82391.9	82099.8	82247.7	82162.7	81320.1	80865.9	80592.6	79444.1	78651.8	77950.3	77109.3	76071.5	75460.4	74406.7	73799.3	72310.5	71884.4	70558	69880.8	68690.8
	[nm]	A09	X9
[nm]		470	471	472	473	474	475	476	477	478	479	480	481	482	483	484	485	486	487	488	489	490	491	492	493	494	495	496	497	498	499	500
	430	40561.9	42050.3	43146.2	44661	45810.9	46678.5	47406.6	47955.9	48704.2	49144.2	48931.5	49480.5	49285.4	49398.3	49324.1	48821	48548.1	48357.2	47713.3	47239.2	46775.3	46334.9	45639	45305.2	44651.7	44319.9	43419.5	43187.9	42365.9	42025.9	41253.8
	431	40619.2	42109.7	43207.1	44724.1	45875.6	46744.4	47473.5	48023.7	48772.9	49213.6	49000.6	49550.4	49355	49468	49393.8	48889.9	48616.7	48425.5	47780.7	47305.9	46841.3	46400.3	45703.4	45369.2	44714.8	44382.5	43480.8	43248.9	42425.8	42085.3	41312.1
	432	41057	42563.6	43672.8	45206.1	46370	47248.2	47985.2	48541.2	49298.6	49744	49528.7	50084.5	49887	50001.2	49926.1	49416.8	49140.7	48947.5	48295.7	47815.7	47346.2	46900.4	46196	45858.2	45196.7	44860.9	43949.5	43715.1	42883	42538.8	41757.3
	433	41519.7	43043.2	44164.9	45715.6	46892.6	47780.7	48525.9	49088.3	49854.2	50304.6	50086.9	50648.9	50449.2	50564.7	50488.7	49973.7	49694.5	49499.1	48839.9	48354.6	47879.8	47429	46716.6	46375	45706	45366.4	44444.7	44207.7	43366.3	43018.2	42227.9
	434	42323.3	43876.3	45019.7	46600.3	47800.2	48705.4	49465.1	50038.3	50819.1	51278.2	51056.3	51629.1	51425.6	51543.3	51465.9	50940.9	50656.3	50457.1	49785.2	49290.5	48806.4	48346.9	47620.8	47272.6	46590.7	46244.5	45304.9	45063.3	44205.6	43850.8	43045.2
	435	43045.2	44624.7	45787.7	47395.2	48615.5	49536.3	50308.9	50891.9	51685.9	52152.9	51927.2	52509.8	52302.8	52422.5	52343.8	51809.9	51520.3	51317.8	50634.4	50131.3	49639	49171.6	48433.1	48078.9	47385.4	47033.3	46077.7	45832	44959.7	44598.8	43779.4
	436	43348.7	44939.4	46110.5	47729.4	48958.3	49885.5	50663.6	51250.7	52050.3	52520.6	52293.3	52880	52671.5	52792.1	52712.9	52175.2	51883.6	51679.6	50991.4	50484.7	49988.9	49518.3	48774.5	48417.9	47719.5	47364.9	46402.6	46155.1	45276.6	44913.2	44088.1
	437	43989.7	45603.9	46792.4	48435.2	49682.3	50623.2	51412.8	52008.6	52820	53297.3	53066.6	53662	53450.5	53572.8	53492.4	52946.7	52650.8	52443.8	51745.5	51231.3	50728.2	50250.6	49495.8	49133.9	48425.2	48065.3	47088.8	46837.7	45946.2	45577.4	44740.1
	438	44923.3	46571.7	47785.4	49463.1	50736.6	51697.5	52503.9	53112.3	53941	54428.3	54192.7	54800.8	54584.7	54709.7	54627.6	54070.3	53768.2	53556.7	52843.6	52318.5	51804.7	51317	50546.2	50176.6	49452.8	49085.3	48088.1	47831.6	46921.2	46544.6	45689.5
	439	46102.6	47794.3	49039.9	50761.6	52068.6	53054.7	53882.2	54506.6	55357.1	55857.2	55615.5	56239.5	56017.8	56146	56061.7	55489.8	55179.7	54962.8	54230.9	53692	53164.7	52664.2	51873.2	51493.9	50751.1	50374	49350.6	49087.3	48153.1	47766.6	46889
	440	46323.2	48023	49274.5	51004.5	52317.8	53308.6	54140.1	54767.4	55621.9	56124.5	55881.6	56508.6	56285.8	56414.6	56329.9	55755.3	55443.8	55225.8	54490.4	53948.9	53419.1	52916.2	52121.4	51740.3	50993.9	50615	49586.7	49322.2	48383.5	47995.1	47113.4
	441	47184.4	48915.8	50190.5	51952.7	53290.3	54299.6	55146.5	55785.6	56655.9	57167.9	56920.4	57559.1	57332.1	57463.4	57377.1	56791.8	56474.4	56252.4	55503.3	54951.8	54412.2	53899.9	53090.3	52702.1	51941.9	51555.9	50508.5	50239.1	49282.9	48887.4	47989.2
	442	47834.2	49589.5	50881.8	52668.2	54024.3	55047.4	55906	56553.9	57436.3	57955.2	57704.4	58351.8	58121.8	58254.8	58167.4	57574	57252.3	57027.1	56267.8	55708.6	55161.6	54642.2	53821.5	53428	52657.3	52266	51204.1	50931	49961.7	49560.7	48650.1
	443	48254.1	50024.7	51328.4	53130.5	54498.4	55530.6	56396.7	57050.2	57940.4	58463.9	58210.8	58864	58631.9	58766.1	58677.9	58079.3	57754.7	57527.7	56761.6	56197.6	55645.7	55121.8	54293.9	53896.9	53119.4	52724.7	51653.6	51378	50400.2	49995.7	49077.1
	444	48625.1	50409.4	51723.1	53539.1	54917.6	55957.6	56830.4	57489	58385.9	58913.5	58658.5	59316.6	59082.8	59218	59129.1	58526	58198.9	57970.1	57198.1	56629.7	56073.6	55545.7	54711.4	54311.4	53527.9	53130.2	52050.8	51773.2	50787.8	50380.1	49454.6
	445	49440.9	51255.1	52590.8	54437.3	55838.9	56896.4	57783.8	58453.4	59365.4	59901.8	59642.6	60311.8	60074	60211.5	60121.1	59507.8	59175.3	58942.6	58157.7	57579.8	57014.4	56477.6	55629.3	55222.5	54425.9	54021.5	52924	52641.7	51639.8	51225.3	50284.2
	446	50060.6	51897.5	53250	55119.6	56538.7	57609.5	58508.1	59186.1	60109.5	60652.6	60390.1	61067.7	60826.9	60966.2	60874.6	60253.7	59917	59681.4	58886.7	58301.5	57729	57185.4	56326.5	55914.7	55108.1	54698.6	53587.4	53301.5	52287	51867.4	50914.5
	447	50775.5	52638.7	54010.5	55906.8	57346.2	58432.3	59343.7	60031.3	60968	61518.8	61252.6	61939.8	61695.6	61836.9	61744	61114.2	60772.7	60533.7	59727.6	59134.1	58553.4	58002.1	57131	56713.2	55895.1	55479.8	54352.7	54062.7	53033.8	52608.1	51641.6
	448	51175.3	53053.2	54435.7	56346.9	57797.7	58892.3	59810.9	60504	61448	62003.2	61734.8	62427.5	62181.4	62323.7	62230.2	61595.4	61251.2	61010.3	60197.9	59599.7	59014.4	58458.8	57580.8	57159.7	56335.2	55916.6	54780.6	54488.4	53451.3	53022.3	52048.2
	449	51902.4	53806.9	55209.1	57147.5	58618.9	59729.1	60660.7	61363.6	62321	62884.1	62612	63314.5	63064.9	63209.2	63114.3	62470.5	62121.4	61877.1	61053.2	60446.5	59852.9	59289.4	58398.9	57971.9	57135.6	56711.1	55558.9	55262.6	54210.8	53775.7	52787.7
	450	51501.4	53391.2	54782.6	56705.9	58166	59267.6	60192	60889.5	61839.5	62398.3	62128.2	62825.3	62577.6	62720.8	62626.7	61987.8	61641.4	61399	60581.5	59979.4	59390.4	58831.3	57947.7	57523.9	56694.2	56272.9	55129.6	54835.6	53791.9	53360.2	52379.8
	451	51351.5	53235.9	54623.2	56541	57996.8	59095.1	60016.9	60712.4	61659.6	62216.7	61947.4	62642.5	62395.5	62538.4	62444.5	61807.5	61462.1	61220.4	60405.2	59804.9	59217.7	58660.1	57779.1	57356.6	56529.2	56109.2	54969.3	54676.1	53635.4	53204.9	52227.4
	452	51662.1	53557.8	54953.6	56882.9	58347.5	59452.5	60379.9	61079.5	62032.5	62593	62322.1	63021.4	62772.9	62916.6	62822.1	62181.3	61833.8	61590.7	60770.5	60166.6	59575.8	59014.9	58128.5	57703.5	56871.1	56448.5	55301.7	55006.7	53959.8	53526.7	52543.3
	453	51537.9	53429.1	54821.4	56746.2	58207.3	59309.6	60234.7	60932.7	61883.4	62442.6	62172.3	62869.9	62622	62765.3	62671.1	62031.8	61685.2	61442.6	60624.5	60022	59432.6	58873	57988.8	57564.8	56734.4	56312.8	55168.8	54874.5	53830.1	53398	52417
	454	51544.6	53436	54828.5	56753.6	58214.8	59317.3	60242.5	60940.6	61891.4	62450.6	62180.3	62878	62630.1	62773.5	62679.2	62039.9	61693.2	61450.6	60632.3	60029.8	59440.3	58880.7	57996.3	57572.2	56741.8	56320.1	55175.9	54881.6	53837.1	53405	52423.8
	455	51388.9	53274.6	54662.9	56582.1	58039	59138.1	60060.5	60756.5	61704.5	62262	61992.5	62688.1	62440.9	62583.9	62489.9	61852.5	61506.8	61265	60449.2	59848.5	59260.8	58702.8	57821.1	57398.3	56570.4	56150	55009.3	54715.8	53674.4	53243.6	52265.5
	456	50398.4	52247.8	53609.4	55491.6	56920.3	57998.3	58902.9	59585.5	60515.2	61062	60797.7	61479.8	61237.4	61377.6	61285.5	60660.3	60321.3	60084.1	59284.1	58694.9	58118.6	57571.4	56706.7	56292	55480	55067.8	53949	53661.3	52639.9	52217.4	51258.1
	457	50272.1	52116.8	53475	55352.5	56777.7	57853	58755.3	59436.2	60363.5	60908.9	60645.3	61325.8	61084	61223.8	61131.9	60508.3	60170.1	59933.6	59135.5	58547.8	57972.9	57427.1	56564.6	56150.9	55341	54929.8	53813.8	53526.8	52508	52086.6	51129.6
	458	50110.3	51949	53302.8	55174.3	56594.9	57666.7	58566.1	59244.8	60169.2	60712.8	60450	61128.3	60887.3	61026.7	60935.1	60313.5	59976.4	59740.6	58945.1	58359.3	57786.3	57242.2	56382.4	55970.2	55162.8	54752.9	53640.5	53354.4	52338.9	51918.9	50965
	459	49406.7	51219.6	52554.4	54399.6	55800.2	56857	57743.8	58413	59324.4	59860.4	59601.3	60270	60032.4	60169.8	60079.5	59466.6	59134.3	58901.8	58117.5	57539.9	56974.9	56438.5	55590.8	55184.3	54388.3	53984.2	52887.4	52605.3	51604.1	51189.9	50249.4
	460	49145.7	50949	52276.8	54112.2	55505.4	56556.6	57438.8	58104.4	59010.9	59544.1	59286.4	59951.6	59715.2	59851.9	59762.1	59152.5	58821.9	58590.6	57810.4	57235.9	56673.9	56140.3	55297.1	54892.7	54100.9	53698.9	52608	52327.4	51331.4	50919.4	49983.9
	[nm]	A10	X10
[nm]		470	471	472	473	474	475	476	477	478	479	480	481	482	483	484	485	486	487	488	489	490	491	492	493	494	495	496	497	498	499	500
	430	48565	50267.9	51614.9	53357.8	54763.2	55826.4	56734.3	57360.7	58272.5	58852.7	58613.9	59210.9	59015.7	59253	59113.1	58559.9	58263.4	58044	57205.2	56697.8	56216.1	55611.8	54830.3	54478	53711.9	53264.5	52183.2	51883.6	50973.2	50475.3	49602.6
	431	48625.5	50330.5	51679.1	53424.2	54831.4	55895.9	56805	57432.1	58345.1	58926	58686.9	59284.6	59089.2	59326.8	59186.7	58632.8	58335.9	58116.3	57276.4	56768.4	56286.1	55681.1	54898.6	54545.8	53778.8	53330.9	52248.1	51948.2	51036.7	50538.2	49664.3
	432	49229.8	50956	52321.4	54088.2	55512.8	56590.6	57511	58145.9	59070.2	59658.3	59416.2	60021.4	59823.6	60064.1	59922.2	59361.5	59060.9	58838.6	57988.3	57473.9	56985.6	56373.1	55580.9	55223.7	54447.1	53993.7	52897.5	52593.9	51670.9	51166.3	50281.6
	433	49808.2	51554.6	52936.1	54723.6	56165	57255.4	58186.6	58829	59764.2	60359.1	60114.2	60726.5	60526.4	60769.7	60626.2	60058.8	59754.7	59529.8	58669.5	58149.1	57655.1	57035.3	56233.8	55872.5	55086.8	54628	53518.9	53211.7	52278	51767.4	50872.3
	434	50727.2	52505.8	53912.8	55733.3	57201.3	58311.8	59260.2	59914.4	60866.9	61472.8	61223.4	61847	61643.1	61891	61744.8	61167	60857.3	60628.2	59752	59222	58718.9	58087.7	57271.4	56903.4	56103.2	55635.9	54506.4	54193.5	53242.5	52722.5	51810.9
	435	51612.7	53422.4	54853.9	56706.2	58199.8	59329.8	60294.7	60960.4	61929.4	62546	62292.2	62926.6	62719.2	62971.4	62822.7	62234.8	61919.7	61686.6	60795.1	60255.8	59743.9	59101.7	58271.2	57896.8	57082.6	56607.1	55457.9	55139.6	54172	53642.9	52715.4
	436	51997.1	53820.3	55262.5	57128.6	58633.3	59771.7	60743.8	61414.4	62390.7	63011.8	62756.1	63395.3	63186.4	63440.4	63290.6	62698.3	62380.9	62146	61247.9	60704.6	60188.9	59541.9	58705.2	58328	57507.7	57028.8	55871	55550.3	54575.5	54042.4	53108
	437	52880.8	54735	56201.6	58099.4	59629.7	60787.4	61776.1	62458.1	63450.9	64082.6	63822.6	64472.7	64260.2	64518.5	64366.1	63763.8	63441	63202.1	62288.7	61736.2	61211.8	60553.8	59702.9	59319.2	58485	57997.9	56820.4	56494.3	55502.9	54960.8	54010.5
	438	53896.1	55785.8	57280.7	59214.9	60774.6	61954.5	62962.1	63657.2	64669.2	65313	65048	65710.5	65493.9	65757.3	65601.9	64988	64659	64415.6	63484.6	62921.6	62387	61716.4	60849.1	60458.1	59607.9	59111.4	57911.4	57578.9	56568.6	56016.1	55047.5
	439	55327	57267	58801.5	60787.1	62388.2	63599.5	64633.8	65347.4	66386.2	67047.1	66775	67455.2	67232.8	67503.1	67343.7	66713.5	66375.7	66125.8	65170.2	64592.1	64043.4	63355	62464.7	62063.3	61190.5	60680.9	59448.9	59107.7	58070.5	57503.3	56509
	440	55690.7	57643.4	59188	61186.6	62798.3	64017.5	65058.7	65776.9	66822.6	67487.8	67214	67898.6	67674.8	67946.9	67786.4	67152	66812	66560.5	65598.6	65016.7	64464.4	63771.5	62875.3	62471.3	61592.7	61079.7	59839.7	59496.2	58452.2	57881.3	56880.5
	441	56714.4	58703	60276	62311.4	63952.6	65194.3	66254.6	66986	68050.9	68728.4	68449.5	69146.7	68918.8	69195.9	69032.4	68386.4	68040.2	67784	66804.4	66211.9	65649.4	64943.7	64031.1	63619.6	62724.9	62202.5	60939.7	60589.9	59526.7	58945.3	57926.1
	442	57528.9	59546.1	61141.7	63206.3	64871.1	66130.6	67206.1	67948.1	69028.2	69715.5	69432.6	70139.8	69908.6	70189.7	70023.9	69368.6	69017.4	68757.5	67763.9	67162.8	66592.2	65876.4	64950.7	64533.3	63625.8	63095.9	61814.9	61460.1	60381.6	59791.8	58758
	443	57978.9	60011.9	61619.9	63700.7	65378.5	66647.9	67731.8	68479.5	69568.1	70260.7	69975.6	70688.4	70455.4	70738.7	70571.6	69911.2	69557.2	69295.3	68293.9	67688.1	67113.1	66391.7	65458.7	65038.1	64123.4	63589.4	62298.4	61940.8	60853.9	60259.5	59217.6
	444	58421	60469.5	62089.8	64186.4	65877.1	67156.1	68248.3	69001.8	70098.7	70796.5	70509.3	71227.4	70992.6	71278.1	71109.7	70444.3	70087.6	69823.8	68814.7	68204.3	67624.9	66898	65957.9	65534	64612.4	64074.3	62773.5	62413.1	61317.9	60719	59669.2
	445	59471.1	61556.3	63205.8	65340.1	67061.1	68363.1	69474.9	70241.9	71358.6	72069	71776.5	72507.6	72268.6	72559.2	72387.8	71710.4	71347.3	71078.7	70051.5	69430.2	68840.3	68100.3	67143.3	66711.9	65773.7	65225.9	63901.7	63534.9	62420	61810.3	60741.6
	446	60221.6	62333.2	64003.4	66164.7	67907.4	69225.9	70351.7	71128.4	72259.1	72978.5	72682.4	73422.7	73180.7	73474.9	73301.4	72615.4	72247.7	71975.7	70935.6	70306.4	69709.1	68959.8	67990.7	67553.8	66603.8	66049.1	64708.2	64336.7	63207.8	62590.4	61508.2
	447	61065.8	63206.9	64900.6	67092.2	68859.3	70196.2	71337.9	72125.5	73272	74001.5	73701.2	74451.9	74206.5	74504.8	74328.9	73633.3	73260.5	72984.7	71929.9	71291.9	70686.2	69926.4	68943.8	68500.7	67537.4	66974.9	65615.2	65238.6	64093.8	63467.8	62370.4
	448	61554.9	63713.3	65420.5	67629.6	69411	70758.6	71909.4	72703.2	73859	74594.3	74291.6	75048.3	74800.9	75101.7	74924.3	74223.2	73847.3	73569.3	72506.1	71863	71252.5	70486.6	69496.1	69049.5	68078.5	67511.5	66140.8	65761.2	64607.2	63976.2	62870
	449	62525.5	64717.8	66452	68695.9	70505.3	71874.2	73043.1	73849.5	75023.5	75770.4	75462.9	76231.5	75980.3	76285.8	76105.6	75393.4	75011.7	74729.3	73649.3	72996	72375.9	71597.9	70591.8	70138.2	69151.8	68575.9	67183.7	66798	65625.9	64984.9	63861.3
	450	61984.8	64158.2	65877.4	68101.9	69895.7	71252.7	72411.5	73211	74374.8	75115.2	74810.4	75572.4	75323.3	75626.2	75447.6	74741.5	74363.1	74083.1	73012.5	72364.9	71750.1	70978.9	69981.4	69531.7	68553.9	67982.9	66602.8	66220.5	65058.4	64423	63309.1
	451	61799.2	63966.1	65680.2	67898	69686.4	71039.4	72194.7	72991.8	74152.1	74890.3	74586.4	75346.1	75097.8	75399.8	75221.7	74517.7	74140.4	73861.3	72793.9	72148.2	71535.3	70766.3	69771.9	69323.5	68348.6	67779.4	66403.3	66022.2	64863.6	64230.1	63119.5
	452	62142.2	64321.1	66044.6	68274.8	70073.1	71433.6	72595.4	73396.8	74563.6	75305.9	75000.4	75764.3	75514.5	75818.2	75639.1	74931.3	74551.9	74271.2	73197.8	72548.6	71932.3	71159.1	70159.1	69708.2	68727.9	68155.5	66771.8	66388.6	65223.6	64586.5	63469.8
	453	61972.7	64145.7	65864.6	68088.7	69882.1	71238.9	72397.4	73196.7	74360.3	75100.6	74795.9	75557.7	75308.6	75611.4	75432.9	74727	74348.6	74068.7	72998.3	72350.8	71736.1	70965	69967.8	69518.2	68540.5	67969.7	66589.8	66207.6	65045.8	64410.4	63296.8
	454	61951.2	64123.4	65841.7	68065	69857.8	71214.1	72372.3	73171.3	74334.5	75074.5	74769.9	75531.4	75282.5	75585.2	75406.7	74701	74322.8	74043	72972.9	72325.6	71711.2	70940.4	69943.5	69494	68516.7	67946.1	66566.6	66184.5	65023.2	64388.1	63274.8
	455	61806.9	63974	65688.3	67906.4	69695	71048.2	72203.6	73000.8	74161.3	74899.6	74595.6	75355.4	75107.1	75409	75230.9	74526.9	74149.6	73870.4	72802.9	72157.1	71544.1	70775.1	69780.5	69332.1	68357.1	67787.7	66411.5	66030.3	64871.6	64238	63127.3
	456	60566.8	62690.4	64370.3	66543.9	68296.7	69622.6	70754.9	71536.1	72673.3	73396.8	73098.9	73843.5	73600.1	73896	73721.5	73031.6	72661.8	72388.3	71342.1	70709.3	70108.6	69355	68380.4	67941	66985.5	66427.6	65079	64705.5	63570	62949.2	61860.7
	457	60426.2	62545	64220.9	66389.5	68138.2	69461.1	70590.8	71370.1	72504.6	73226.5	72929.3	73672.1	73429.3	73724.5	73550.4	72862.1	72493.2	72220.3	71176.6	70545.3	69945.9	69194.1	68221.7	67783.3	66830.1	66273.5	64928	64555.3	63422.5	62803.1	61717.2
	458	60070.2	62176.5	63842.6	65998.4	67736.7	69051.9	70174.9	70949.6	72077.5	72795	72499.7	73238.1	72996.7	73290.2	73117.1	72432.9	72066.1	71794.8	70757.2	70129.6	69533.9	68786.4	67819.8	67384	66436.4	65883.1	64545.5	64175	63048.9	62433.1	61353.6
	459	59245.8	61323.2	62966.4	65092.6	66807.1	68104.2	69211.8	69975.9	71088.3	71796	71504.7	72233	71994.9	72284.4	72113.7	71438.8	71077.1	70809.5	69786.2	69167.2	68579.6	67842.4	66889.1	66459.2	65524.6	64978.9	63659.7	63294.3	62183.6	61576.3	60511.6
	460	58844.7	60908	62540.1	64651.9	66354.8	67643.1	68743.2	69502.2	70607	71309.9	71020.6	71744	71507.5	71795	71625.4	70955.2	70595.9	70330.1	69313.7	68698.9	68115.3	67383.1	66436.2	66009.3	65081	64539	63228.7	62865.8	61762.6	61159.4	60101.9
	[nm]	A11	X11
[nm]		470	471	472	473	474	475	476	477	478	479	480	481	482	483	484	485	486	487	488	489	490	491	492	493	494	495	496	497	498	499	500
	430	49638.4	51454.1	52715.3	54508.9	55936.2	57001.3	57801.5	58513.9	59338.3	59934.9	59647.4	60251.9	60023.8	60149.3	60072.7	59434.6	59130.8	58842.2	58036.1	57489.2	56924.3	56353.2	55573.3	55147.6	54306.6	53908.8	52865.7	52508.7	51608	51193.1	50234.8
	431	49835.7	51658.6	52924.9	54725.6	56158.5	57227.9	58031.3	58746.6	59574.2	60173.1	59884.5	60491.4	60262.4	60388.4	60311.5	59670.9	59365.8	59076.1	58266.8	57717.7	57150.6	56577.3	55794.2	55366.8	54522.5	54123.2	53075.8	52717.4	51813.2	51396.6	50434.6
	432	50414.8	52258.9	53539.9	55361.5	56811.1	57892.9	58705.7	59429.2	60266.5	60872.4	60580.4	61194.4	60962.7	61090.1	61012.4	60364.3	60055.7	59762.6	58943.9	58388.4	57814.7	57234.7	56442.6	56010.2	55156.1	54752.1	53692.6	53330	52415.2	51993.9	51020.6
	433	51106.2	52975.6	54274.1	56120.8	57590.2	58686.9	59510.8	60244.3	61093	61707.2	61411.3	62033.6	61798.8	61927.9	61849.1	61192.1	60879.3	60582.2	59752.3	59189.2	58607.6	58019.7	57216.6	56778.4	55912.5	55503	54429	54061.4	53134.1	52706.9	51720.3
	434	51947.3	53847.5	55167.4	57044.4	58538	59652.7	60490.2	61235.7	62098.5	62722.8	62421.9	63054.5	62815.8	62947.1	62867	62199.2	61881.3	61579.3	60735.7	60163.3	59572.1	58974.5	58158.3	57712.8	56832.7	56416.4	55324.8	54951.1	54008.6	53574.4	52571.5
	435	52929.1	54865.1	56210	58122.5	59644.3	60780.1	61633.4	62393	63272.1	63908.2	63601.6	64246.2	64003	64136.7	64055.1	63374.7	63050.7	62743	61883.5	61300.3	60698	60089.1	59257.4	58803.5	57906.8	57482.6	56370.3	55989.6	55029.2	54586.9	53565.1
	436	53356.6	55308.3	56664	58592	60126.1	61271	62131.2	62897	63783.1	64424.4	64115.4	64765.1	64520	64654.8	64572.5	63886.6	63560	63249.8	62383.4	61795.5	61188.2	60574.4	59736.1	59278.5	58374.5	57946.9	56825.6	56441.9	55473.7	55027.8	53997.7
	437	54159.5	56140.5	57516.6	59473.6	61030.9	62193	63066.2	63843.4	64742.9	65393.8	65080.2	65739.7	65490.8	65627.7	65544.2	64847.9	64516.4	64201.6	63322.1	62725.4	62109	61485.9	60634.9	60170.5	59252.9	58818.9	57680.7	57291.2	56308.5	55855.8	54810.3
	438	55213	57232.6	58635.5	60630.5	62218.1	63402.8	64293	65085.4	66002.3	66665.9	66346.1	67018.5	66764.8	66904.3	66819.2	66109.4	65771.5	65450.5	64553.9	63945.5	63317.2	62682	61814.4	61341	60405.5	59963.1	58802.8	58405.7	57403.8	56942.4	55876.5
	439	56760.7	58836.9	60279.1	62330.1	63962.1	65180.1	66095.2	66909.8	67852.4	68534.6	68205.9	68897.1	68636.3	68779.7	68692.2	67962.5	67615.1	67285.1	66363.4	65738	65092	64439	63547.2	63060.4	62098.7	61643.9	60451.1	60042.8	59012.9	58538.5	57442.8
	440	57102.9	59191.7	60642.6	62705.9	64347.8	65573.1	66493.7	67313.2	68261.6	68947.8	68617.1	69312.5	69050.1	69194.4	69106.4	68372.3	68022.8	67690.8	66763.5	66134.4	65484.5	64827.6	63930.3	63440.6	62473.2	62015.6	60815.6	60404.9	59368.8	58891.5	57789.1
	441	58168.2	60295.9	61773.9	63875.7	65548.2	66796.4	67734.2	68569	69535	70234.1	69897.2	70605.6	70338.3	70485.3	70395.6	69647.8	69291.8	68953.6	68009.1	67368.1	66706.1	66037	65123	64624.2	63638.6	63172.5	61950.1	61531.8	60476.3	59990.1	58867.2
	442	59070.6	61231.3	62732.2	64866.6	66565	67832.6	68784.9	69632.7	70613.7	71323.6	70981.5	71700.9	71429.4	71578.7	71487.6	70728.2	70366.7	70023.3	69064	68413.2	67740.9	67061.4	66133.2	65626.7	64625.8	64152.5	62911.1	62486.3	61414.4	60920.7	59780.4
	443	59575.6	61754.8	63268.5	65421.2	67134.1	68412.5	69373	70228	71217.4	71933.4	71588.4	72313.9	72040.1	72190.7	72098.8	71332.9	70968.3	70621.9	69654.5	68998.1	68320.1	67634.7	66698.6	66187.7	65178.3	64701	63449	63020.5	61939.5	61441.6	60291.5
	444	60109	62307.7	63834.9	66006.9	67735.2	69025	69994.1	70856.7	71855	72577.4	72229.3	72961.3	72685.1	72837	72744.3	71971.6	71603.7	71254.2	70278.1	69615.8	68931.7	68240.3	67295.8	66780.3	65761.9	65280.2	64017	63584.7	62494.1	61991.7	60831.3
	445	61070.8	63304.7	64856.4	67063.1	68819	70129.5	71114.1	71990.5	73004.8	73738.7	73385.1	74128.8	73848.1	74002.5	73908.3	73123.2	72749.4	72394.4	71402.7	70729.8	70034.7	69332.2	68372.6	67848.9	66814.2	66324.8	65041.4	64602.1	63494	62983.6	61804.6
	446	61931.2	64196.5	65770.1	68007.9	69788.6	71117.5	72116	73004.8	74033.3	74777.6	74419	75173.1	74888.6	75045.1	74949.6	74153.4	73774.4	73414.3	72408.6	71726.3	71021.4	70309	69335.9	68804.8	67755.5	67259.2	65957.7	65512.3	64388.6	63871	62675.4
	447	62867.2	65166.7	66764.1	69035.7	70843.3	72192.3	73205.9	74108.1	75152.2	75907.7	75543.7	76309.2	76020.4	76179.2	76082.3	75274.1	74889.3	74523.8	73502.9	72810.3	72094.8	71371.6	70383.7	69844.6	68779.5	68275.7	66954.6	66502.4	65361.7	64836.2	63622.6
	448	63384.8	65703.3	67313.8	69604.1	71426.6	72786.7	73808.6	74718.3	75771	76532.7	76165.7	76937.5	76646.3	76806.5	76708.7	75893.9	75505.9	75137.4	74108.1	73409.7	72688.4	71959.2	70963.3	70419.7	69345.8	68837.9	67505.8	67049.9	65899.9	65370.1	64146.4
	449	64302.6	66654.7	68288.5	70612	72460.9	73840.7	74877.4	75800.2	76868.1	77640.9	77268.5	78051.6	77756.1	77918.6	77819.5	76992.8	76599.2	76225.4	75181.2	74472.7	73740.9	73001.2	71990.8	71439.4	70349.9	69834.7	68483.3	68020.8	66854.1	66316.6	65075.3
	450	63813.9	66148.1	67769.6	70075.4	71910.2	73279.5	74308.3	75224.2	76284	77050.9	76681.3	77458.4	77165.2	77326.5	77228.1	76407.7	76017.1	75646.2	74609.9	73906.8	73180.5	72446.4	71443.7	70896.5	69815.3	69304	67962.9	67503.9	66346	65812.7	64580.8
	451	63635.6	65963.3	67580.2	69879.6	71709.3	73074.8	74100.7	75014	76070.8	76835.6	76467.1	77242	76949.6	77110.4	77012.3	76194.2	75804.7	75434.8	74401.4	73700.2	72976	72244	71244.1	70698.4	69620.2	69110.3	67773	67315.3	66160.6	65628.8	64400.3
	452	64067.8	66411.3	68039.1	70354.1	72196.3	73571	74603.9	75523.4	76587.4	77357.4	76986.4	77766.6	77472.2	77634.1	77535.3	76711.7	76319.5	75947.1	74906.7	74200.8	73471.6	72734.6	71727.9	71178.5	70093	69579.6	68233.3	67772.4	66610	66074.5	64837.7
	453	63923.3	66261.5	67885.7	70195.5	72033.5	73405.2	74435.7	75353.1	76414.7	77183	76812.8	77591.2	77297.5	77459	77360.5	76538.7	76147.4	75775.8	74737.8	74033.5	73306	72570.6	71566.2	71018	69935	69422.8	68079.4	67619.6	66459.8	65925.5	64691.5
	454	64024.3	66366.2	67993	70306.4	72147.3	73521.1	74553.3	75472.1	76535.4	77304.9	76934.1	77713.8	77419.6	77581.4	77482.7	76659.6	76267.7	75895.5	74855.8	74150.4	73421.8	72685.2	71679.2	71130.2	70045.4	69532.4	68186.9	67726.4	66564.7	66029.6	64793.6
	455	63862.8	66198.8	67821.5	70129.1	71965.3	73335.7	74365.3	75281.8	76342.4	77110	76740.1	77517.8	77224.4	77385.7	77287.3	76466.3	76075.4	75704.1	74667.1	73963.4	73236.6	72501.9	71498.5	70950.8	69868.8	69357.1	68015	67555.6	66396.9	65863.1	64630.3
	456	62626.4	64917.1	66508.4	68771.3	70572	71915.8	72925.5	73824.3	74864.4	75617	75254.3	76017	75729.2	75887.5	75790.9	74985.8	74602.5	74238.4	73221.4	72531.4	71818.7	71098.2	70114.2	69577.1	68516.1	68014.2	66698.1	66247.7	65111.4	64587.9	63378.9
	457	62480.9	64766.3	66353.8	68611.5	70408	71748.7	72756	73652.7	74690.4	75441.3	75079.5	75840.3	75553.2	75711.1	75614.8	74811.6	74429.1	74065.9	73051.3	72362.9	71651.8	70933	69951.3	69415.4	68356.8	67856.2	66543.1	66093.8	64960.1	64437.8	63231.7
	458	62295.4	64574.1	66156.9	68407.9	70199	71535.8	72540.1	73434.1	74468.7	75217.4	74856.6	75615.2	75329	75486.4	75390.4	74589.5	74208.2	73846.1	72834.5	72148.1	71439.1	70722.5	69743.6	69209.4	68154	67654.8	66345.6	65897.6	64767.3	64246.6	63044
	459	61505.2	63755	65317.7	67540.1	69308.6	70628.4	71619.9	72502.6	73524.1	74263.3	73907.1	74656.1	74373.5	74528.9	74434.1	73643.4	73266.9	72909.4	71910.6	71232.9	70532.9	69825.4	68859	68331.5	67289.5	66796.6	65504.1	65061.7	63945.7	63431.6	62244.3
	460	61134.7	63370.9	64924.3	67133.3	68891.1	70202.9	71188.5	72065.9	73081.2	73815.9	73461.9	74206.3	73925.4	74079.9	73985.7	73199.8	72825.6	72470.1	71477.4	70803.8	70108	69404.7	68444.2	67919.9	66884.1	66394.2	65109.5	64669.8	63560.5	63049.5	61869.3
	[nm]	A12	X12
[nm]		470	471	472	473	474	475	476	477	478	479	480	481	482	483	484	485	486	487	488	489	490	491	492	493	494	495	496	497	498	499	500
	430	49367.1	51141	52432.7	54218.6	55664.1	56588.8	57544.6	58208.7	59098.2	59653.4	59393.5	60029.3	59826.9	59982.3	59838.1	59290.2	58949.6	58732.2	57921.6	57358.8	56834.5	56261.1	55465.5	55055.9	54248.7	53807.9	52802.4	52478.5	51491.5	51032.9	50125.3
	431	49433.9	51210.2	52503.6	54292	55739.4	56665.4	57622.5	58287.4	59178.2	59734.1	59473.8	60110.5	59907.9	60063.4	59919.1	59370.4	59029.3	58811.7	58000	57436.4	56911.3	56337.2	55540.5	55130.4	54322.1	53880.7	52873.9	52549.5	51561.1	51102	50193.1
	432	49978.3	51774.2	53081.9	54890	56353.3	57289.5	58257.1	58929.4	59830	60392	60128.9	60772.5	60567.7	60724.9	60579	60024.3	59679.5	59459.4	58638.8	58069	57538.2	56957.7	56152.2	55737.6	54920.4	54474.1	53456.2	53128.3	52129	51664.8	50745.9
	433	50623.1	52442.1	53766.6	55598	57080.3	58028.5	59008.6	59689.6	60601.8	61171.1	60904.5	61556.5	61349	61508.3	61360.5	60798.6	60449.4	60226.5	59395.2	58818.1	58280.4	57692.5	56876.6	56456.6	55628.8	55176.8	54145.8	53813.7	52801.5	52331.3	51400.5
	434	51584.8	53438.4	54788	56654.2	58164.6	59130.9	60129.6	60823.5	61753	62333.1	62061.6	62725.9	62514.5	62676.8	62526.2	61953.6	61597.7	61370.6	60523.6	59935.5	59387.6	58788.5	57957.1	57529.1	56685.6	56225	55174.4	54836	53804.6	53325.4	52377
	435	52493.9	54380.2	55753.6	57652.7	59189.7	60173	61189.4	61895.5	62841.4	63431.7	63155.3	63831.4	63616.2	63781.4	63628.1	63045.5	62683.3	62452.2	61590.2	60991.8	60434.2	59824.6	58978.5	58543	57684.7	57216	56146.8	55802.4	54752.8	54265.3	53300.1
	436	52982.1	54886	56272.2	58188.9	59740.3	60732.7	61758.5	62471.2	63425.9	64021.7	63742.7	64425.1	64207.9	64374.6	64219.9	63631.8	63266.4	63033.1	62163.1	61559.1	60996.3	60381	59527.1	59087.5	58221.2	57748.1	56669	56321.4	55262.1	54770	53795.8
	437	53741.9	55673.1	57079.2	59023.4	60597	61603.7	62644.1	63367.1	64335.4	64939.8	64656.9	65349	65128.7	65297.8	65140.9	64544.4	64173.6	63937	63054.6	62441.9	61871.1	61246.9	60380.8	59934.9	59056.1	58576.3	57481.7	57129.1	56054.6	55555.4	54567.3
	438	54858.6	56829.8	58265.1	60249.8	61856	62883.6	63945.7	64683.7	65672.2	66289.1	66000.3	66706.8	66481.9	66654.5	66494.4	65885.4	65507	65265.4	64364.7	63739.2	63156.6	62519.5	61635.3	61180.2	60283.2	59793.3	58676	58316.1	57219.2	56709.7	55701.1
	439	56269.1	58291	59763.2	61798.9	63446.5	64500.5	65589.9	66346.8	67360.7	67993.5	67697.3	68421.9	68191.3	68368.4	68204.1	67579.5	67191.3	66943.5	66019.6	65378.1	64780.5	64126.9	63220.1	62753.2	61833.2	61330.7	60184.7	59815.5	58690.5	58167.8	57133.3
	440	56640.7	58676	60158	62207.1	63865.5	64926.5	66023.1	66785	67805.6	68442.6	68144.4	68873.8	68641.7	68819.9	68654.5	68025.8	67635.1	67385.7	66455.7	65809.9	65208.3	64550.5	63637.6	63167.7	62241.5	61735.8	60582.2	60210.6	59078.1	58552	57510.6
	441	57668.3	59740.5	61249.3	63335.6	65024.2	66104.4	67220.9	67996.6	69035.8	69684.3	69380.7	70123.3	69887	70068.4	69900.1	69259.9	68862.1	68608.2	67661.3	67003.8	66391.3	65721.6	64792.1	64313.7	63370.7	62855.8	61681.3	61302.9	60149.9	59614.3	58554
	442	58589.2	60694.5	62227.4	64347	66062.5	67160	68294.3	69082.4	70138.1	70797	70488.6	71243.1	71003	71187.3	71016.2	70365.9	69961.7	69703.8	68741.7	68073.8	67451.5	66771	65826.8	65340.7	64382.7	63859.5	62666.3	62281.9	61110.4	60566.2	59489
	443	59045.6	61167.3	62712.2	64848.3	66577.2	67683.2	68826.4	69620.6	70684.6	71348.6	71037.7	71798.1	71556.1	71741.9	71569.5	70914.1	70506.8	70246.8	69277.3	68604.1	67977	67291.2	66339.6	65849.7	64884.3	64357	63154.5	62767.1	61586.5	61038.1	59952.4
	444	59519.6	61658.3	63215.6	65368.9	67111.6	68226.5	69378.9	70179.5	71252	71921.3	71608	72374.5	72130.5	72317.8	72144	71483.4	71072.8	70810.7	69833.4	69154.8	68522.7	67831.4	66872.2	66378.3	65405.1	64873.7	63661.4	63270.9	62080.9	61528	60433.7
	445	60569.2	62745.7	64330.4	66521.7	68295.1	69429.7	70602.4	71417.1	72508.5	73189.7	72870.8	73650.8	73402.6	73593.2	73416.3	72744	72326.2	72059.5	71064.9	70374.4	69731.1	69027.6	68051.5	67548.9	66558.5	66017.7	64784.1	64386.7	63175.7	62613.1	61499.5
	446	61356.7	63561.5	65166.8	67386.5	69183.1	70332.4	71520.3	72345.6	73451.2	74141.2	73818.2	74608.4	74356.9	74550	74370.8	73689.8	73266.5	72996.3	71988.9	71289.3	70637.7	69925.1	68936.2	68427.2	67423.9	66876	65626.4	65223.8	63997	63427.2	62299
	447	62222.9	64458.7	66086.7	68337.8	70159.7	71325.2	72529.9	73366.9	74488.1	75187.8	74860.2	75661.6	75406.5	75602.3	75420.7	74730	74300.8	74026.8	73005.1	72295.7	71634.8	70912.2	69909.3	69393.1	68375.7	67820.1	66552.8	66144.6	64900.4	64322.5	63178.5
	448	62707.1	64960.4	66601	68869.6	70705.7	71880.3	73094.3	73937.9	75067.8	75773	75442.8	76250.4	75993.4	76190.7	76007.6	75311.6	74879	74602.9	73573.2	72858.3	72192.3	71464	70453.4	69933.1	68907.8	68347.9	67070.7	66659.3	65405.5	64823.1	63670.1
	449	63614.1	65900	67564.4	69865.8	71728.4	72920	74151.6	75007.3	76153.6	76869	76534.1	77353.3	77092.6	77292.8	77107	76400.9	75962.1	75682	74637.4	73912.2	73236.5	72497.7	71472.5	70944.7	69904.5	69336.5	68040.9	67623.5	66351.6	65760.7	64591.1
	450	63161.5	65431.1	67083.6	69368.6	71218	72401.1	73624	74473.6	75611.7	76322	75989.5	76802.9	76544	76742.8	76558.3	75857.3	75421.6	75143.4	74106.3	73386.2	72715.4	71981.8	70963.9	70439.9	69407.1	68843.1	67556.7	67142.3	65879.4	65292.8	64131.5
	451	62984.2	65247.5	66895.4	69174	71018.2	72198	73417.4	74264.6	75399.5	76107.8	75776.2	76587.4	76329.2	76527.4	76343.5	75644.4	75209.9	74932.6	73898.4	73180.3	72511.3	71779.8	70764.8	70242.2	69212.3	68649.9	67367.2	66953.9	65694.6	65109.6	63951.5
	452	63391.3	65669.2	67327.7	69621.1	71477.2	72664.6	73891.9	74744.6	75886.9	76599.7	76266	77082.4	76822.6	77022	76836.9	76133.3	75696	75416.9	74376	73653.3	72980	72243.8	71222.1	70696.2	69659.7	69093.7	67802.6	67386.7	66119.2	65530.4	64364.9
	453	63171	65441	67093.8	69379.2	71228.8	72412.1	73635.1	74484.9	75623.2	76333.6	76001	76814.6	76555.6	76754.4	76570	75868.8	75433	75154.8	74117.6	73397.4	72726.4	71992.8	70974.7	70450.6	69417.6	68853.6	67567	67152.5	65889.4	65302.7	64141.2
	454	63126.6	65395	67046.6	69330.4	71178.7	72361.2	73583.4	74432.5	75570	76279.9	75947.5	76760.5	76501.8	76700.4	76516.1	75815.4	75379.9	75102	74065.5	73345.7	72675.3	71942.1	70924.7	70401	69368.8	68805.1	67519.5	67105.3	65843.1	65256.8	64096.1
	455	62969.4	65232.1	66879.7	69157.7	71001.5	72181	73400.1	74247.2	75381.8	76089.9	75758.4	76569.4	76311.3	76509.4	76325.6	75626.6	75192.2	74915	73881	73163.1	72494.3	71763	70748.1	70225.7	69196.1	68633.8	67351.3	66938.2	65679.1	65094.3	63936.5
	456	61740.8	63959.4	65574.8	67808.4	69616.2	70772.7	71968	72798.5	73911	74605.4	74280.3	75075.4	74822.4	75016.7	74836.4	74151.1	73725.2	73453.3	72439.5	71735.6	71079.9	70362.8	69367.8	68855.5	67846	67294.7	66037.2	65632.2	64397.7	63824.2	62689
	457	61516.9	63727.4	65336.9	67562.4	69363.6	70515.9	71706.9	72534.5	73642.9	74334.7	74010.9	74803.1	74551	74744.5	74564.9	73882.1	73457.7	73186.8	72176.7	71475.4	70822	70107.6	69116.1	68605.7	67599.9	67050.6	65797.7	65394.1	64164.1	63592.7	62461.6
	458	61264.1	63465.5	65068.4	67284.8	69078.6	70226.2	71412.3	72236.4	73340.3	74029.2	73706.7	74495.7	74244.6	74437.4	74258.5	73578.5	73155.9	72886.1	71880.1	71181.7	70531	69819.5	68832.1	68323.8	67322.1	66775	65527.3	65125.3	63900.4	63331.4	62204.9
	459	60474.8	62647.8	64230.1	66417.9	68188.6	69321.4	70492.2	71305.7	72395.4	73075.5	72757.1	73535.9	73288.1	73478.3	73301.8	72630.5	72213.3	71947.1	70954.1	70264.6	69622.3	68919.9	67945.3	67443.6	66454.7	65914.7	64683.1	64286.3	63077.1	62515.4	61403.5
	460	60058.9	62217	63788.4	65961.2	67719.7	68844.7	70007.5	70815.4	71897.6	72573	72256.8	73030.3	72784.1	72973.1	72797.7	72131.1	71716.8	71452.3	70466.2	69781.4	69143.5	68446	67478.1	66979.8	65997.7	65461.5	64238.3	63844.2	62643.4	62085.6	60981.3
	[nm]	B01	X13
[nm]		470	471	472	473	474	475	476	477	478	479	480	481	482	483	484	485	486	487	488	489	490	491	492	493	494	495	496	497	498	499	500
	430	49240.3	51077.7	52330.8	54095.2	55521.7	56472.9	57399.1	58022.8	58853.4	59420	59117.4	59758.3	59541.1	59643	59536	58948.2	58559.1	58400.7	57562.6	57003.3	56445.9	55852.7	55105.3	54658.7	53795.2	53436.1	52369.2	52048.2	51122.6	50669.7	49712
	431	49407.1	51250.7	52508	54278.4	55709.7	56664.1	57593.5	58219.2	59052.7	59621.2	59317.6	59960.7	59742.7	59844.9	59737.6	59147.8	58757.4	58598.4	57757.5	57196.3	56637	56041.8	55291.9	54843.8	53977.3	53617.1	52546.5	52224.5	51295.8	50841.3	49880.3
	432	50147.4	52018.6	53294.8	55091.8	56544.5	57513.2	58456.5	59091.6	59937.6	60514.6	60206.5	60859.2	60637.9	60741.7	60632.7	60034.1	59637.9	59476.5	58623	58053.4	57485.7	56881.6	56120.4	55665.6	54786.2	54420.5	53333.9	53007	52064.4	51603.1	50627.8
	433	50765.3	52659.6	53951.6	55770.6	57241.3	58221.9	59176.8	59819.8	60676.1	61260.3	60948.3	61609.1	61385.1	61490.1	61379.8	60773.8	60372.8	60209.4	59345.3	58768.7	58194	57582.5	56811.9	56351.5	55461.2	55091.1	53991.1	53660.2	52705.9	52239	51251.6
	434	51658.6	53586.1	54900.8	56751.9	58248.4	59246.3	60218	60872.3	61743.7	62338.1	62020.7	62693.1	62465.2	62572	62459.8	61843.1	61435	61268.8	60389.5	59802.8	59217.9	58595.7	57811.5	57343	56437.1	56060.4	54941.1	54604.3	53633.3	53158.1	52153.4
	435	52573.9	54535.6	55873.6	57757.5	59280.5	60296.1	61285	61950.9	62837.7	63442.7	63119.7	63803.9	63572	63680.7	63566.5	62938.9	62523.6	62354.4	61459.5	60862.4	60267.2	59633.9	58835.9	58359.1	57437.1	57053.7	55914.6	55571.9	54583.6	54100.1	53077.5
	436	53069.9	55050.2	56400.8	58302.4	59839.8	60864.9	61863.2	62535.3	63430.6	64041.3	63715.2	64405.9	64171.8	64281.6	64166.3	63532.7	63113.5	62942.7	62039.4	61436.6	60835.8	60196.5	59391	58909.7	57979	57592	56442.1	56096.2	55098.6	54610.5	53578.2
	437	53832.5	55841.2	57211.2	59140.2	60699.7	61739.5	62752.2	63433.9	64342.1	64961.5	64630.7	65331.4	65093.9	65205.2	65088.3	64445.7	64020.4	63847.1	62930.9	62319.4	61710	61061.5	60244.4	59756.2	58812.1	58419.6	57253.1	56902.2	55890.3	55395.2	54348.1
	438	54916.2	56965.4	58363	60330.7	61921.6	62982.5	64015.5	64711	65637.4	66269.3	65931.8	66646.6	66404.3	66517.9	66398.6	65743	65309.2	65132.4	64197.8	63574	62952.3	62290.8	61457.2	60959.1	59996.1	59595.7	58405.7	58047.8	57015.5	56510.4	55442.2
	439	56367.2	58470.5	59905	61924.7	63557.7	64646.5	65706.8	66420.7	67371.6	68020.2	67673.8	68407.5	68158.8	68275.4	68152.9	67480.1	67034.7	66853.3	65893.9	65253.7	64615.6	63936.6	63081	62569.8	61581.3	61170.2	59948.9	59581.5	58521.9	58003.4	56907.1
	440	56828.2	58948.7	60394.9	62431.2	64077.5	65175.3	66244.2	66963.9	67922.6	68576.5	68227.3	68967	68716.3	68833.8	68710.4	68032	67583	67400.1	66432.9	65787.4	65144.1	64459.5	63596.9	63081.5	62084.9	61670.5	60439.2	60068.8	59000.5	58477.8	57372.5
	441	57793.8	59950.4	61421.2	63492.1	65166.4	66282.8	67369.9	68101.8	69076.8	69741.8	69386.7	70138.9	69883.9	70003.5	69877.9	69188	68731.4	68545.4	67561.7	66905.3	66251	65554.8	64677.6	64153.4	63139.9	62718.5	61466.2	61089.5	60003.1	59471.5	58347.4
	442	58693.1	60883.2	62376.9	64480.1	66180.4	67314.2	68418.2	69161.5	70151.7	70827	70466.4	71230.3	70971.4	71092.8	70965.3	70264.6	69800.9	69612	68613	67946.4	67281.9	66574.9	65684	65151.7	64122.4	63694.4	62422.7	62040.1	60936.8	60396.9	59255.3
	443	59204.9	61414.1	62920.9	65042.3	66757.5	67901.1	69014.8	69764.6	70763.4	71444.6	71080.8	71851.4	71590.2	71712.7	71584.1	70877.3	70409.6	70219	69211.3	68538.9	67868.6	67155.4	66256.7	65719.8	64681.5	64249.8	62967	62581.1	61468.2	60923.6	59772
	444	59606.4	61830.6	63347.5	65483.4	67210.2	68361.6	69482.8	70237.7	71243.2	71929.1	71562.9	72338.7	72075.7	72199	72069.5	71357.9	70887	70695.2	69680.7	69003.7	68328.9	67610.8	66706.1	66165.5	65120.2	64685.5	63394	63005.4	61885	61336.7	60177.4
	445	60653.9	62917.2	64460.8	66634.2	68391.3	69563	70703.9	71472.1	72495.2	73193.2	72820.5	73609.9	73342.3	73467.8	73336	72612	72132.8	71937.6	70905.2	70216.3	69529.7	68799	67878.3	67328.2	66264.6	65822.3	64508	64112.7	62972.5	62414.7	61234.9
	446	61519.8	63815.3	65381	67585.4	69367.6	70556	71713.2	72492.3	73530.1	74238	73860	74660.7	74389.3	74516.6	74382.9	73648.5	73162.5	72964.5	71917.4	71218.6	70522.2	69781.1	68847.3	68289.3	67210.5	66761.9	65428.9	65027.9	63871.5	63305.6	62109
	447	62450.6	64780.9	66370.3	68608	70417.2	71623.5	72798.3	73589.2	74642.7	75361.3	74977.6	75790.4	75514.9	75644.1	75508.4	74762.9	74269.5	74068.5	73005.6	72296.3	71589.3	70837	69889	69322.6	68227.4	67772.1	66418.9	66011.8	64837.9	64263.5	63048.8
	448	62884	65230.4	66830.8	69084.1	70905.8	72120.5	73303.4	74099.8	75160.6	75884.2	75497.8	76316.3	76038.9	76169	76032.3	75281.7	74784.9	74582.5	73512.2	72797.9	72086	71328.5	70374	69803.7	68700.9	68242.4	66879.8	66469.9	65287.8	64709.4	63486.3
	449	63827.1	66208.8	67833.1	70120.2	71969.3	73202.2	74402.8	75211.2	76287.9	77022.3	76630.2	77460.9	77179.3	77311.4	77172.7	76410.7	75906.5	75701.1	74614.7	73889.7	73167.2	72398.3	71429.5	70850.6	69731.3	69265.9	67882.8	67466.8	66267	65679.9	64438.5
	450	63348.5	65712.3	67324.5	69594.4	71429.6	72653.3	73844.9	74647.2	75715.8	76444.8	76055.5	76880.1	76600.6	76731.6	76594	75837.7	75337.3	75133.4	74055.2	73335.7	72618.5	71855.4	70893.8	70319.3	69208.4	68746.4	67373.8	66960.9	65770.1	65187.4	63955.3
	451	63154	65510.6	67117.8	69380.8	71210.3	72430.3	73618.3	74418.1	75483.4	76210.1	75822.1	76644.1	76365.5	76496.1	76358.9	75605	75106	74902.8	73827.9	73110.6	72395.6	71634.8	70676.2	70103.5	68995.9	68535.4	67167	66755.4	65568.2	64987.3	63759
	452	63508.1	65877.9	67494.1	69769.8	71609.6	72836.4	74031	74835.3	75906.7	76637.4	76247.2	77073.8	76793.6	76925	76787	76028.9	75527.1	75322.8	74241.8	73520.5	72801.5	72036.5	71072.5	70496.5	69382.8	68919.7	67543.6	67129.6	65935.9	65351.7	64116.5
	453	63351.9	65715.9	67328.1	69598.2	71433.5	72657.2	73848.9	74651.3	75720	76448.9	76059.7	76884.3	76604.8	76735.8	76598.2	75841.9	75341.4	75137.5	74059.2	73339.7	72622.5	71859.3	70897.7	70323.1	69212.1	68750.2	67377.5	66964.5	65773.7	65191	63958.8
	454	63398.4	65764	67377.5	69649.2	71485.9	72710.5	73903.1	74706	75775.5	76505	76115.5	76940.6	76660.9	76792.1	76654.3	75897.5	75396.6	75192.6	74113.5	73393.4	72675.7	71912	70949.7	70374.7	69262.9	68800.6	67426.9	67013.6	65821.9	65238.8	64005.7
	455	63073.2	65426.7	67031.9	69292	71119.2	72337.6	73524	74322.8	75386.8	76112.6	75725	76546	76267.7	76398.2	76261.1	75508.2	75009.9	74806.9	73733.4	73017	72302.9	71543.2	70585.8	70013.7	68907.6	68447.7	67081	66669.9	65484.3	64904.2	63677.4
	456	61861.8	64170.1	65744.5	67961.2	69753.3	70948.3	72111.9	72895.4	73938.9	74650.8	74270.7	75075.8	74802.9	74930.9	74796.5	74058	73569.3	73370.2	72317.3	71614.6	70914.3	70169.1	69230.1	68669	67584.2	67133.1	65792.7	65389.4	64226.6	63657.6	62454.4
	457	61768.9	64073.7	65645.7	67859	69648.5	70841.7	72003.6	72785.9	73827.9	74538.6	74159.1	74963	74690.5	74818.3	74684.1	73946.7	73458.7	73259.9	72208.6	71507	70807.7	70063.7	69126.1	68565.9	67482.6	67032.2	65693.8	65291.2	64130.1	63562	62360.5
	458	61411	63702.5	65265.3	67465.9	69244.9	70431.2	71586.4	72364.1	73400.1	74106.7	73729.4	74528.7	74257.7	74384.8	74251.4	73518.3	73033.1	72835.4	71790.2	71092.7	70397.5	69657.7	68725.5	68168.6	67091.6	66643.8	65313.2	64912.9	63758.5	63193.7	61999.2
	459	60508.2	62766	64306	66474.1	68227	69395.8	70534.1	71300.4	72321.1	73017.3	72645.6	73433.1	73166.2	73291.3	73159.9	72437.5	71959.5	71764.8	70734.9	70047.6	69362.6	68633.7	67715.3	67166.5	66105.4	65664.2	64353.1	63958.7	62821.3	62264.7	61087.8
	460	60169.4	62414.6	63945.8	66101.9	67844.9	69007.2	70139.1	70901.1	71916.1	72608.4	72238.7	73021.9	72756.4	72880.9	72750.2	72031.9	71556.5	71362.9	70338.8	69655.4	68974.2	68249.4	67336.1	66790.4	65735.2	65296.5	63992.7	63600.5	62469.5	61916	60745.7
	[nm]	B02	X14
[nm]		470	471	472	473	474	475	476	477	478	479	480	481	482	483	484	485	486	487	488	489	490	491	492	493	494	495	496	497	498	499	500
	430	20802.1	21442.9	21889.8	22503.3	23023	23372	23645	23871.9	24162.4	24348.4	24209.7	24420.8	24300.5	24374.5	24337.7	24076.6	23941.8	23837.9	23489.7	23262.2	23051.8	22820.4	22511.9	22331.3	22024.5	21870.7	21417.5	21271.9	20950.4	20755.6	20366.7
	431	20893.9	21537.6	21986.4	22602.7	23124.6	23475.1	23749.4	23977.3	24269	24455.8	24316.5	24528.6	24407.8	24482.1	24445.1	24182.9	24047.5	23943.1	23593.3	23364.9	23153.6	22921.2	22611.3	22429.8	22121.7	21967.2	21512	21365.8	21042.9	20847.2	20456.6
	432	21206.3	21859.6	22315.1	22940.6	23470.3	23826.1	24104.5	24335.7	24631.8	24821.5	24680.1	24895.3	24772.7	24848.1	24810.6	24544.4	24407	24301.1	23946.1	23714.2	23499.7	23263.8	22949.3	22765.1	22452.4	22295.6	21833.6	21685.2	21357.4	21158.9	20762.5
	433	21511.9	22174.7	22636.8	23271.2	23808.6	24169.5	24451.9	24686.5	24986.9	25179.2	25035.8	25254.1	25129.8	25206.3	25168.2	24898.2	24758.8	24651.4	24291.2	24056	23838.5	23599.1	23280.1	23093.3	22776	22617	22148.3	21997.8	21665.3	21463.9	21061.7
	434	21919.1	22594.4	23065.2	23711.7	24259.2	24627	24914.7	25153.8	25459.8	25655.8	25509.7	25732.1	25605.4	25683.4	25644.6	25369.5	25227.5	25118	24751	24511.3	24289.7	24045.8	23720.8	23530.4	23207.1	23045.1	22567.5	22414.2	22075.4	21870.1	21460.4
	435	22375.5	23064.8	23545.5	24205.4	24764.3	25139.7	25433.5	25677.5	25989.9	26190	26040.8	26267.9	26138.6	26218.1	26178.5	25897.7	25752.7	25640.9	25266.3	25021.7	24795.4	24546.5	24214.7	24020.3	23690.3	23524.9	23037.4	22880.9	22535	22325.5	21907.2
	436	22586.4	23282.2	23767.4	24433.5	24997.7	25376.7	25673.2	25919.5	26234.9	26436.8	26286.2	26515.5	26384.9	26465.2	26425.3	26141.8	25995.4	25882.6	25504.5	25257.5	25029.1	24777.8	24442.9	24246.7	23913.6	23746.6	23254.5	23096.5	22747.4	22535.9	22113.7
	437	22996.5	23705	24199	24877.2	25451.7	25837.5	26139.4	26390.2	26711.3	26916.9	26763.5	26996.9	26864	26945.8	26905.1	26616.5	26467.5	26352.6	25967.6	25716.1	25483.6	25227.8	24886.7	24687	24347.8	24177.8	23676.8	23515.9	23160.4	22945.1	22515.2
	438	23497.8	24221.7	24726.5	25419.5	26006.5	26400.7	26709.2	26965.5	27293.6	27503.7	27347	27585.5	27449.6	27533.2	27491.6	27196.7	27044.4	26927.1	26533.7	26276.7	26039.1	25777.7	25429.2	25225.1	24878.6	24704.9	24192.9	24028.5	23665.3	23445.3	23006
	439	24151.4	24895.4	25414.2	26126.5	26729.8	27135	27452.1	27715.5	28052.7	28268.6	28107.6	28352.7	28213.1	28299	28256.3	27953.1	27796.6	27676	27271.7	27007.6	26763.4	26494.7	26136.5	25926.7	25570.6	25392	24865.8	24696.9	24323.5	24097.4	23645.9
	440	24382.9	25134.1	25657.8	26377	26986.1	27395.2	27715.2	27981.2	28321.6	28539.6	28377	28624.5	28483.6	28570.3	28527.2	28221.1	28063.1	27941.3	27533.1	27266.5	27019.9	26748.7	26387.1	26175.3	25815.7	25635.4	25104.2	24933.6	24556.7	24328.4	23872.6
	441	24890	25656.8	26191.5	26925.6	27547.3	27964.9	28291.7	28563.1	28910.7	29133.2	28967.2	29219.8	29076	29164.5	29120.5	28808	28646.8	28522.4	28105.7	27833.6	27581.9	27305	26935.9	26719.7	26352.6	26168.6	25626.3	25452.2	25067.5	24834.4	24369.1
	442	25317.2	26097.1	26641	27387.7	28020.1	28444.9	28777.2	29053.3	29406.8	29633.2	29464.4	29721.3	29575	29665	29620.2	29302.4	29138.4	29011.9	28588.1	28311.3	28055.2	27773.6	27398.1	27178.2	26804.9	26617.7	26066.1	25889	25497.7	25260.6	24787.3
	443	25572.1	26360	26909.3	27663.5	28302.3	28731.3	29067	29345.9	29703	29931.6	29761.1	30020.6	29872.8	29963.8	29918.5	29597.6	29431.9	29304.1	28876	28596.4	28337.8	28053.3	27674.1	27452	27074.8	26885.8	26328.6	26149.7	25754.5	25515	25037
	444	25818.8	26614.2	27168.8	27930.3	28575.3	29008.5	29347.4	29629	29989.5	30220.3	30048.2	30310.2	30161	30252.8	30207.1	29883	29715.7	29586.8	29154.5	28872.2	28611.1	28323.9	27941	27716.7	27336	27145.1	26582.6	26402	26002.9	25761.1	25278.5
	445	26352.5	27164.3	27730.4	28507.7	29165.9	29608.1	29954	30241.4	30609.3	30845	30669.2	30936.7	30784.4	30878.1	30831.5	30500.7	30330	30198.3	29757.1	29469	29202.5	28909.3	28518.5	28289.6	27901	27706.2	27132	26947.7	26540.3	26293.6	25800.9
	446	26774.6	27599.5	28174.6	28964.3	29633.1	30082.4	30433.8	30725.8	31099.7	31339.1	31160.6	31432.3	31277.5	31372.7	31325.4	30989.3	30815.8	30682.1	30233.8	29941.1	29670.3	29372.4	28975.4	28742.8	28348	28150	27566.7	27379.4	26965.5	26714.8	26214.3
	447	27202.3	28040.4	28624.7	29427	30106.5	30562.9	30920	31216.7	31596.5	31839.7	31658.3	31934.4	31777.2	31873.9	31825.8	31484.4	31308.1	31172.2	30716.8	30419.4	30144.3	29841.7	29438.3	29202	28800.8	28599.7	28007	27816.7	27396.3	27141.6	26633
	448	27475.4	28321.8	28912	29722.4	30408.7	30869.7	31230.3	31530	31913.6	32159.3	31976.1	32254.9	32096.1	32193.8	32145.2	31800.4	31622.3	31485.1	31025.1	30724.7	30446.9	30141.2	29733.7	29495.1	29089.9	28886.8	28288.2	28095.9	27671.2	27414	26900.4
	449	27891.6	28750.9	29350	30172.7	30869.4	31337.4	31703.5	32007.7	32397.1	32646.5	32460.5	32743.6	32582.4	32681.6	32632.2	32282.1	32101.4	31962.1	31495.1	31190.2	30908.1	30597.8	30184.2	29941.9	29530.6	29324.4	28716.7	28521.6	28090.5	27829.3	27307.9
	450	27720.8	28574.8	29170.3	29987.9	30680.4	31145.5	31509.4	31811.7	32198.8	32446.6	32261.8	32543.1	32382.9	32481.4	32432.4	32084.5	31904.9	31766.4	31302.3	30999.2	30718.9	30410.5	29999.4	29758.6	29349.8	29144.8	28540.9	28346.9	27918.5	27658.9	27140.7
	451	27702.5	28556	29151.1	29968.2	30660.1	31124.9	31488.6	31790.7	32177.5	32425.2	32240.5	32521.6	32361.5	32460	32411	32063.3	31883.8	31745.4	31281.6	30978.7	30698.6	30390.4	29979.6	29739	29330.4	29125.6	28522.1	28328.2	27900	27640.7	27122.8
	452	27894.6	28754	29353.2	30175.9	30872.7	31340.7	31706.9	32011.1	32400.6	32650	32464	32747.1	32585.9	32685	32635.7	32285.6	32104.8	31965.5	31498.5	31193.5	30911.4	30601.1	30187.4	29945.1	29533.7	29327.5	28719.8	28524.6	28093.4	27832.3	27310.8
	453	27807.5	28664.2	29261.5	30081.7	30776.3	31242.8	31607.9	31911.1	32299.4	32548	32362.6	32644.8	32484.1	32583	32533.8	32184.8	32004.6	31865.7	31400.1	31096.1	30814.9	30505.5	30093.2	29851.6	29441.5	29236	28630.1	28435.6	28005.7	27745.4	27225.5
	454	27772	28627.6	29224.2	30043.3	30737	31203	31567.6	31870.5	32258.2	32506.5	32321.4	32603.2	32442.7	32541.4	32492.3	32143.7	31963.8	31825.1	31360.1	31056.5	30775.6	30466.6	30054.8	29813.6	29404	29198.7	28593.6	28399.3	27970	27710	27190.8
	455	27681.6	28534.4	29129	29945.5	30636.9	31101.4	31464.7	31766.7	32153.2	32400.7	32216.1	32497	32337	32435.5	32386.5	32039	31859.7	31721.4	31258	30955.3	30675.4	30367.4	29956.9	29716.5	29308.2	29103.6	28500.5	28306.8	27878.9	27619.8	27102.3
	456	27097.9	27932.8	28514.8	29314.1	29991	30445.6	30801.3	31096.9	31475.2	31717.5	31536.8	31811.8	31655.2	31751.6	31703.6	31363.5	31187.9	31052.6	30598.9	30302.6	30028.6	29727.1	29325.3	29089.9	28690.3	28489.9	27899.5	27710	27291.1	27037.4	26530.8
	457	26936.6	27766.4	28345	29139.5	29812.4	30264.3	30617.9	30911.7	31287.8	31528.6	31349	31622.4	31466.7	31562.5	31514.9	31176.7	31002.2	30867.7	30416.7	30122.2	29849.8	29550.1	29150.7	28916.7	28519.4	28320.3	27733.4	27545	27128.6	26876.4	26372.8
	458	26725.9	27549.3	28123.4	28911.7	29579.3	30027.7	30378.5	30670	31043.2	31282.1	31103.9	31375.2	31220.7	31315.7	31268.4	30933	30759.8	30626.3	30178.9	29886.6	29616.4	29319.1	28922.7	28690.6	28296.4	28098.9	27516.6	27329.6	26916.5	26666.3	26166.6
	459	26263.6	27072.7	27636.9	28411.5	29067.6	29508.2	29853	30139.4	30506.2	30741	30565.9	30832.4	30680.6	30774	30727.5	30397.9	30227.7	30096.5	29656.8	29369.6	29104.1	28811.9	28422.4	28194.3	27806.9	27612.8	27040.6	26856.8	26450.9	26205	25714
	460	26007.5	26808.7	27367.4	28134.5	28784.1	29220.5	29561.9	29845.5	30208.7	30441.2	30267.8	30531.7	30381.4	30473.9	30427.9	30101.4	29932.9	29803	29367.6	29083.2	28820.2	28530.9	28145.2	27919.3	27535.8	27343.5	26776.9	26594.9	26192.9	25949.4	25463.2
	[nm]	B03	X15
[nm]		470	471	472	473	474	475	476	477	478	479	480	481	482	483	484	485	486	487	488	489	490	491	492	493	494	495	496	497	498	499	500
	430	1059.17	1080.55	1088.24	1107.76	1118.75	1128.51	1136.84	1142.69	1162.02	1163.37	1154.93	1167.95	1157.89	1159.01	1157.3	1148.52	1141.89	1136.49	1129.42	1118.57	1113.38	1106.87	1093.19	1088.85	1079.17	1072.64	1055.48	1053.79	1035.27	1026.34	1010.62
	431	1056.18	1077.5	1085.16	1104.63	1115.59	1125.32	1133.63	1139.47	1158.74	1160.09	1151.67	1164.65	1154.62	1155.74	1154.03	1145.28	1138.67	1133.28	1126.23	1115.41	1110.24	1103.74	1090.11	1085.77	1076.13	1069.61	1052.5	1050.81	1032.34	1023.44	1007.76
	432	1068.03	1089.58	1097.33	1117.02	1128.11	1137.95	1146.35	1152.25	1171.73	1173.1	1164.58	1177.71	1167.57	1168.7	1166.97	1158.12	1151.44	1145.99	1138.86	1127.92	1122.69	1116.12	1102.33	1097.95	1088.2	1081.6	1064.31	1062.6	1043.92	1034.92	1019.07
	433	1081.39	1103.21	1111.06	1130.99	1142.22	1152.18	1160.69	1166.66	1186.39	1187.77	1179.15	1192.45	1182.17	1183.32	1181.57	1172.61	1165.84	1160.32	1153.11	1142.03	1136.74	1130.08	1116.12	1111.69	1101.81	1095.13	1077.62	1075.89	1056.98	1047.87	1031.81
	434	1091.42	1113.45	1121.37	1141.48	1152.82	1162.87	1171.45	1177.48	1197.4	1198.79	1190.09	1203.51	1193.14	1194.3	1192.53	1183.49	1176.66	1171.09	1163.81	1152.63	1147.28	1140.57	1126.48	1122	1112.03	1105.29	1087.62	1085.87	1066.79	1057.59	1041.39
	435	1103.82	1126.1	1134.11	1154.45	1165.91	1176.08	1184.76	1190.86	1211	1212.41	1203.61	1217.18	1206.7	1207.87	1206.08	1196.93	1190.03	1184.39	1177.03	1165.72	1160.32	1153.53	1139.28	1134.75	1124.66	1117.85	1099.97	1098.21	1078.91	1069.61	1053.22
	436	1101.5	1123.73	1131.73	1152.03	1163.46	1173.61	1182.27	1188.36	1208.46	1209.87	1201.08	1214.63	1204.16	1205.33	1203.55	1194.42	1187.53	1181.91	1174.55	1163.27	1157.88	1151.1	1136.88	1132.36	1122.3	1115.5	1097.66	1095.9	1076.64	1067.36	1051.01
	437	1110.17	1132.57	1140.63	1161.09	1172.61	1182.84	1191.57	1197.71	1217.96	1219.38	1210.53	1224.18	1213.63	1214.81	1213.01	1203.82	1196.87	1191.2	1183.79	1172.42	1166.99	1160.16	1145.83	1141.27	1131.13	1124.28	1106.3	1104.52	1085.11	1075.75	1059.27
	438	1131.36	1154.19	1162.4	1183.26	1195	1205.42	1214.32	1220.57	1241.22	1242.66	1233.64	1247.55	1236.8	1238	1236.17	1226.8	1219.72	1213.94	1206.39	1194.8	1189.27	1182.31	1167.7	1163.06	1152.72	1145.74	1127.42	1125.61	1105.82	1096.29	1079.49
	439	1150.81	1174.04	1182.39	1203.6	1215.55	1226.15	1235.2	1241.56	1262.56	1264.03	1254.85	1269	1258.07	1259.29	1257.43	1247.89	1240.69	1234.82	1227.14	1215.35	1209.71	1202.63	1187.78	1183.06	1172.54	1165.44	1146.8	1144.96	1124.84	1115.14	1098.06
	440	1137.54	1160.49	1168.75	1189.72	1201.53	1212	1220.95	1227.24	1247.99	1249.45	1240.38	1254.36	1243.56	1244.76	1242.92	1233.5	1226.38	1220.57	1212.98	1201.33	1195.76	1188.76	1174.08	1169.41	1159.02	1152	1133.57	1131.75	1111.86	1102.28	1085.39
	441	1153.62	1176.9	1185.27	1206.54	1218.51	1229.14	1238.21	1244.59	1265.64	1267.11	1257.91	1272.1	1261.14	1262.36	1260.49	1250.93	1243.71	1237.83	1230.13	1218.31	1212.66	1205.57	1190.67	1185.94	1175.4	1168.28	1149.6	1147.75	1127.58	1117.86	1100.73
	442	1154.83	1178.14	1186.52	1207.81	1219.8	1230.43	1239.52	1245.9	1266.97	1268.45	1259.24	1273.44	1262.47	1263.69	1261.82	1252.25	1245.02	1239.13	1231.42	1219.6	1213.94	1206.84	1191.93	1187.19	1176.64	1169.51	1150.81	1148.96	1128.77	1119.04	1101.89
	443	1152.76	1176.03	1184.39	1205.64	1217.61	1228.23	1237.29	1243.66	1264.7	1266.17	1256.98	1271.15	1260.2	1261.42	1259.56	1250.01	1242.79	1236.91	1229.21	1217.41	1211.76	1204.67	1189.79	1185.06	1174.53	1167.42	1148.74	1146.9	1126.74	1117.03	1099.92
	444	1149.63	1172.83	1181.17	1202.36	1214.3	1224.89	1233.93	1240.28	1261.26	1262.73	1253.56	1267.7	1256.78	1257.99	1256.13	1246.61	1239.41	1233.55	1225.87	1214.1	1208.47	1201.4	1186.56	1181.84	1171.34	1164.24	1145.62	1143.78	1123.68	1114	1096.93
	445	1152.19	1175.44	1183.81	1205.04	1217	1227.62	1236.68	1243.05	1264.07	1265.54	1256.36	1270.52	1259.58	1260.8	1258.93	1249.39	1242.17	1236.3	1228.61	1216.8	1211.16	1204.08	1189.2	1184.47	1173.95	1166.84	1148.18	1146.33	1126.19	1116.48	1099.37
	446	1151.91	1175.16	1183.52	1204.75	1216.71	1227.32	1236.38	1242.74	1263.76	1265.24	1256.05	1270.21	1259.27	1260.49	1258.63	1249.08	1241.87	1236	1228.31	1216.51	1210.87	1203.78	1188.91	1184.18	1173.66	1166.55	1147.9	1146.05	1125.91	1116.21	1099.1
	447	1150.19	1173.4	1181.75	1202.95	1214.89	1225.48	1234.53	1240.89	1261.87	1263.34	1254.17	1268.31	1257.39	1258.61	1256.75	1247.21	1240.02	1234.15	1226.47	1214.69	1209.06	1201.98	1187.13	1182.41	1171.91	1164.81	1146.18	1144.34	1124.23	1114.54	1097.46
	448	1138.13	1161.1	1169.36	1190.34	1202.16	1212.64	1221.59	1227.88	1248.65	1250.1	1241.03	1255.02	1244.21	1245.41	1243.57	1234.14	1227.02	1221.21	1213.62	1201.96	1196.39	1189.38	1174.69	1170.02	1159.62	1152.6	1134.17	1132.35	1112.45	1102.86	1085.96
	449	1138.82	1161.8	1170.07	1191.06	1202.88	1213.37	1222.33	1228.62	1249.4	1250.85	1241.77	1255.77	1244.96	1246.16	1244.32	1234.88	1227.76	1221.95	1214.35	1202.68	1197.11	1190.1	1175.4	1170.72	1160.32	1153.29	1134.85	1133.03	1113.11	1103.52	1086.61
	450	1111.63	1134.06	1142.13	1162.62	1174.16	1184.4	1193.15	1199.29	1219.57	1220.99	1212.13	1225.8	1215.24	1216.41	1214.62	1205.4	1198.45	1192.77	1185.36	1173.97	1168.53	1161.69	1147.34	1142.78	1132.62	1125.76	1107.76	1105.98	1086.54	1077.17	1060.67
	451	1084.04	1105.91	1113.78	1133.76	1145.02	1155	1163.53	1169.52	1189.3	1190.68	1182.04	1195.37	1185.07	1186.22	1184.47	1175.48	1168.7	1163.17	1155.93	1144.83	1139.52	1132.85	1118.86	1114.41	1104.51	1097.82	1080.26	1078.53	1059.57	1050.44	1034.34
	452	1075.48	1097.19	1104.99	1124.81	1135.98	1145.89	1154.34	1160.29	1179.91	1181.29	1172.71	1185.93	1175.72	1176.86	1175.12	1166.2	1159.47	1153.99	1146.81	1135.79	1130.53	1123.91	1110.03	1105.61	1095.79	1089.15	1071.73	1070.01	1051.21	1042.15	1026.18
	453	1049.12	1070.29	1077.9	1097.24	1108.13	1117.8	1126.05	1131.84	1150.99	1152.33	1143.96	1156.86	1146.9	1148.01	1146.31	1137.62	1131.05	1125.7	1118.7	1107.95	1102.81	1096.36	1082.82	1078.51	1068.93	1062.45	1045.46	1043.78	1025.44	1016.6	1001.02
	454	1033.39	1054.24	1061.74	1080.79	1091.52	1101.03	1109.16	1114.87	1133.73	1135.05	1126.81	1139.51	1129.7	1130.79	1129.12	1120.56	1114.09	1108.82	1101.92	1091.34	1086.28	1079.92	1066.58	1062.34	1052.9	1046.52	1029.78	1028.13	1010.06	1001.35	986.012
	455	1003.5	1023.75	1031.03	1049.53	1059.95	1069.19	1077.08	1082.63	1100.94	1102.22	1094.22	1106.56	1097.03	1098.09	1096.47	1088.15	1081.87	1076.75	1070.05	1059.77	1054.86	1048.69	1035.73	1031.61	1022.45	1016.25	1000	998.396	980.85	972.394	957.495
	456	967.244	986.764	993.784	1011.61	1021.65	1030.56	1038.17	1043.52	1061.16	1062.4	1054.69	1066.58	1057.39	1058.42	1056.85	1048.84	1042.78	1037.85	1031.39	1021.49	1016.75	1010.8	998.313	994.344	985.509	979.539	963.873	962.326	945.414	937.263	922.903
	457	943.158	962.192	969.037	986.42	996.212	1004.9	1012.32	1017.53	1034.74	1035.94	1028.42	1040.02	1031.06	1032.06	1030.53	1022.72	1016.82	1012	1005.71	996.048	991.431	985.629	973.453	969.582	960.967	955.147	939.871	938.362	921.871	913.923	899.92
	458	915.846	934.328	940.975	957.856	967.364	975.8	983.003	988.064	1004.78	1005.95	998.643	1009.9	1001.2	1002.17	1000.69	993.103	987.371	982.698	976.586	967.204	962.721	957.087	945.264	941.505	933.14	927.487	912.654	911.189	895.175	887.458	873.86
	459	884.167	902.011	908.428	924.724	933.904	942.048	949.002	953.888	970.021	971.151	964.101	974.971	966.572	967.509	966.08	958.752	953.219	948.707	942.806	933.75	929.422	923.982	912.568	908.939	900.863	895.407	881.086	879.672	864.212	856.761	843.635
	460	859.671	877.02	883.259	899.104	908.029	915.948	922.71	927.46	943.146	944.245	937.39	947.959	939.793	940.703	939.314	932.19	926.809	922.422	916.685	907.879	903.671	898.383	887.285	883.757	875.904	870.599	856.675	855.3	840.268	833.024	820.261
	[nm]	B04	X16
[nm]		470	471	472	473	474	475	476	477	478	479	480	481	482	483	484	485	486	487	488	489	490	491	492	493	494	495	496	497	498	499	500
	430	43112.4	44706.4	45838.9	47431.5	48713.1	49566	50352.7	50982.2	51769.2	52252.9	52023.2	52570.5	52434	52487.7	52461.1	51975.5	51646.8	51488.2	50718	50269.6	49771.3	49239	48563.3	48183.1	47461.6	47178.9	46162.5	45900.7	45031.8	44640.3	43804.2
	431	43197.3	44794.4	45929.1	47524.9	48809	49663.6	50451.8	51082.5	51871	52355.7	52125.6	52674	52537.2	52591	52564.4	52077.8	51748.5	51589.5	50817.8	50368.5	49869.2	49335.9	48658.9	48277.9	47555	47271.8	46253.3	45991	45120.4	44728.2	43890.4
	432	43775.3	45393.8	46543.7	48160.8	49462.1	50328.1	51126.9	51766.1	52565.1	53056.3	52823.1	53378.8	53240.2	53294.7	53267.8	52774.7	52440.9	52279.8	51497.8	51042.5	50536.6	49996.1	49310	48924	48191.4	47904.3	46872.2	46606.4	45724.2	45326.7	44477.7
	433	44344.6	45984.1	47149	48787.1	50105.3	50982.6	51791.8	52439.3	53248.7	53746.2	53510	54073	53932.6	53987.8	53960.5	53461	53122.9	52959.7	52167.5	51706.3	51193.8	50646.2	49951.2	49560.2	48818.1	48527.3	47481.8	47212.5	46318.8	45916.1	45056.1
	434	45064.3	46730.4	47914.2	49578.9	50918.5	51810.1	52632.4	53290.4	54112.9	54618.5	54378.5	54950.6	54807.9	54864	54836.2	54328.7	53985.1	53819.2	53014.2	52545.5	52024.6	51468.2	50761.9	50364.6	49610.4	49314.9	48252.4	47978.8	47070.6	46661.4	45787.4
	435	45936.1	47634.5	48841.1	50538.1	51903.6	52812.4	53650.6	54321.3	55159.8	55675.2	55430.5	56013.6	55868.2	55925.4	55897.1	55379.7	55029.5	54860.4	54039.8	53562	53031.1	52463.9	51744	51338.9	50570.1	50268.9	49185.9	48907	47981.2	47564.1	46673.2
	436	46274	47984.8	49200.4	50909.8	52285.4	53200.8	54045.2	54720.9	55565.5	56084.7	55838.2	56425.6	56279.1	56336.8	56308.2	55787	55434.2	55263.9	54437.3	53956	53421.2	52849.8	52124.6	51716.5	50942.1	50638.7	49547.7	49266.7	48334.1	47913.9	47016.5
	437	46946.9	48682.7	49915.9	51650.2	53045.7	53974.5	54831.2	55516.7	56373.6	56900.3	56650.2	57246.2	57097.6	57156	57127.1	56598.3	56240.4	56067.6	55229	54740.7	54198	53618.4	52882.6	52468.6	51682.9	51375.1	50268.2	49983.2	49037	48610.7	47700.2
	438	47903.4	49674.5	50932.9	52702.5	54126.5	55074.2	55948.3	56647.7	57522.1	58059.6	57804.4	58412.5	58260.9	58320.5	58291	57751.4	57386.2	57209.9	56354.2	55855.9	55302.3	54710.8	53960	53537.6	52735.9	52421.8	51292.4	51001.5	50036.1	49601.1	48672
	439	49262.2	51083.5	52377.6	54197.4	55661.8	56636.3	57535.3	58254.6	59153.7	59706.5	59444	60069.4	59913.5	59974.8	59944.4	59389.6	59014	58832.7	57952.7	57440.3	56870.9	56262.7	55490.6	55056.2	54231.7	53908.7	52747.3	52448.2	51455.3	51008	50052.6
	440	49560.7	51393.1	52695	54525.8	55999.1	56979.6	57883.9	58607.6	59512.2	60068.3	59804.3	60433.4	60276.5	60338.2	60307.7	59749.5	59371.6	59189.2	58303.8	57788.4	57215.5	56603.6	55826.9	55389.8	54560.4	54235.4	53066.9	52766	51767.1	51317.1	50355.9
	441	50450.5	52315.8	53641.1	55504.8	57004.5	58002.6	58923.2	59659.8	60580.7	61146.8	60878	61518.5	61358.8	61421.6	61390.5	60822.2	60437.6	60251.9	59350.7	58825.9	58242.8	57619.9	56829.2	56384.3	55540	55209.2	54019.7	53713.4	52696.6	52238.5	51260.1
	442	51271.5	53167.2	54514	56408	57932.2	58946.5	59882.1	60630.7	61566.6	62141.8	61868.7	62519.6	62357.3	62421.1	62389.5	61812	61421.1	61232.4	60316.5	59783.2	59190.6	58557.6	57754	57301.9	56443.8	56107.6	54898.8	54587.5	53554.1	53088.6	52094.2
	443	51636.3	53545.4	54901.8	56809.3	58344.3	59365.8	60308.1	61062	62004.5	62583.9	62308.8	62964.3	62800.9	62865.2	62833.3	62251.7	61858.1	61668	60745.6	60208.5	59611.7	58974.1	58164.9	57709.5	56845.3	56506.8	55289.4	54975.8	53935.1	53466.3	52464.8
	444	52094.8	54020.9	55389.4	57313.8	58862.4	59893	60843.7	61604.3	62555.2	63139.7	62862.2	63523.5	63358.6	63423.4	63391.3	62804.6	62407.4	62215.6	61285	60743.2	60141.1	59497.9	58681.4	58222	57350.2	57008.6	55780.4	55464	54414.1	53941.1	52930.7
	445	52943.7	54901.2	56291.9	58247.7	59821.6	60869	61835.1	62608.1	63574.5	64168.5	63886.5	64558.6	64391	64456.9	64424.3	63827.9	63424.3	63229.4	62283.7	61733	61121	60467.4	59637.6	59170.7	58284.7	57937.5	56689.3	56367.8	55300.7	54820	53793.2
	446	53613.4	55595.7	57004	58984.6	60578.3	61638.9	62617.3	63400.1	64378.7	64980.2	64694.6	65375.2	65205.5	65272.3	65239.2	64635.4	64226.6	64029.3	63071.5	62513.9	61894.2	61232.3	60392	59919.2	59022	58670.4	57406.4	57080.8	56000.3	55513.5	54473.7
	447	54484.2	56498.6	57929.8	59942.5	61562.1	62640	63634.3	64429.8	65424.3	66035.6	65745.3	66437	66264.5	66332.3	66298.8	65685.1	65269.7	65069.2	64095.9	63529.2	62899.4	62226.7	61372.8	60892.4	59980.5	59623.3	58338.7	58007.9	56909.8	56415.1	55358.4
	448	54854.5	56882.6	58323.5	60349.9	61980.6	63065.8	64066.8	64867.7	65868.9	66484.4	66192.2	66888.6	66714.9	66783.2	66749.4	66131.5	65713.3	65511.4	64531.5	63961	63327	62649.7	61790	61306.2	60388.2	60028.5	58735.2	58402.2	57296.6	56798.5	55734.7
	449	55735.5	57796.1	59260.2	61319.2	62976	64078.6	65095.7	65909.5	66926.8	67552.2	67255.3	67962.8	67786.4	67855.7	67821.4	67193.6	66768.7	66563.5	65567.9	64988.2	64344	63655.8	62782.3	62290.8	61358	60992.6	59678.5	59340.1	58216.8	57710.7	56629.8
	450	55251.7	57294.5	58745.9	60787	62429.4	63522.5	64530.7	65337.5	66346	66965.9	66671.6	67373	67198.1	67266.8	67232.8	66610.5	66189.2	65985.9	64998.9	64424.2	63785.6	63103.4	62237.4	61750.2	60825.5	60463.2	59160.6	58825.1	57711.5	57209.9	56138.3
	451	55096.5	57133.6	58580.9	60616.2	62254	63344	64349.4	65153.9	66159.6	66777.7	66484.2	67183.7	67009.3	67077.9	67043.9	66423.3	66003.3	65800.5	64816.3	64243.2	63606.4	62926.1	62062.6	61576.7	60654.6	60293.4	58994.4	58659.8	57549.4	57049.1	55980.6
	452	55448.8	57498.9	58955.5	61003.8	62652.1	63749.1	64760.9	65570.5	66582.6	67204.8	66909.4	67613.3	67437.8	67506.8	67472.6	66848.1	66425.3	66221.2	65230.7	64654	64013.1	63328.5	62459.5	61970.5	61042.5	60678.9	59371.6	59035	57917.4	57413.9	56338.6
	453	55310	57355	58807.9	60851.1	62495.3	63589.5	64598.8	65406.4	66416	67036.5	66741.9	67444	67268.9	67337.8	67303.7	66680.7	66259	66055.5	65067.4	64492.1	63852.9	63170	62303.1	61815.4	60889.7	60527	59223	58887.2	57772.4	57270.2	56197.5
	454	55327.4	57372.9	58826.3	60870.2	62514.9	63609.4	64619	65426.9	66436.8	67057.5	66762.8	67465.2	67290	67358.9	67324.8	66701.6	66279.8	66076.2	65087.8	64512.3	63872.9	63189.7	62322.6	61834.7	60908.8	60546	59241.6	58905.6	57790.5	57288.1	56215.1
	455	55158.2	57197.6	58646.5	60684.1	62323.8	63415	64421.5	65226.9	66233.7	66852.5	66558.7	67259	67084.3	67153	67119	66497.7	66077.2	65874.2	64888.9	64315.2	63677.6	62996.6	62132.1	61645.7	60722.6	60360.9	59060.5	58725.6	57613.9	57113	56043.3
	456	54019.5	56016.7	57435.7	59431.3	61037.1	62105.8	63091.5	63880.3	64866.3	65472.4	65184.6	65870.4	65699.4	65766.6	65733.3	65124.9	64713	64514.2	63549.2	62987.4	62363	61696	60849.4	60373	59469	59114.8	57841.2	57513.2	56424.4	55933.9	54886.3
	457	53961.1	55956.2	57373.7	59367.1	60971.2	62038.7	63023.4	63811.2	64796.2	65401.6	65114.2	65799.2	65628.4	65695.6	65662.3	65054.5	64643.1	64444.5	63480.6	62919.3	62295.6	61629.4	60783.6	60307.8	59404.7	59050.9	57778.7	57451	56363.5	55873.5	54827
	458	53772.7	55760.8	57173.3	59159.8	60758.2	61822.1	62803.3	63588.4	64569.9	65173.3	64886.8	65569.4	65399.2	65466.2	65433	64827.4	64417.4	64219.5	63258.9	62699.6	62078.1	61414.2	60571.4	60097.2	59197.3	58844.7	57576.9	57250.4	56166.7	55678.4	54635.5
	459	53040.3	55001.3	56394.6	58354	59930.7	60980	61947.9	62722.3	63690.4	64285.5	64003	64676.3	64508.4	64574.5	64541.8	63944.4	63540	63344.7	62397.3	61845.6	61232.5	60577.6	59746.4	59278.6	58391	58043.2	56792.7	56470.6	55401.6	54920	53891.3
	460	52800.9	54753.1	56140.1	58090.6	59660.2	60704.8	61668.3	62439.2	63403	63995.4	63714.2	64384.5	64217.3	64283	64250.5	63655.8	63253.2	63058.9	62115.7	61566.5	60956.2	60304.3	59476.7	59011.1	58127.4	57781.2	56536.4	56215.8	55151.6	54672.2	53648.1
	[nm]	B05	X17
[nm]		470	471	472	473	474	475	476	477	478	479	480	481	482	483	484	485	486	487	488	489	490	491	492	493	494	495	496	497	498	499	500
	430	29434.2	30407.9	31021.3	31980.1	32724	33176.1	33604.8	33954.5	34362.3	34606.9	34422.8	34736.9	34559.2	34627.2	34520.7	34175.3	33950.3	33798.5	33314.5	33001	32686.8	32359.3	31889.4	31664.1	31194.3	30970.8	30376.7	30190.8	29642.2	29416.5	28872.4
	431	29454.7	30429.1	31042.9	32002.4	32746.8	33199.2	33628.2	33978.2	34386.2	34631	34446.7	34761.1	34583.3	34651.3	34544.7	34199.1	33974	33822	33337.7	33024	32709.6	32381.8	31911.6	31686.1	31216	30992.3	30397.9	30211.9	29662.8	29437	28892.6
	432	29847.2	30834.6	31456.6	32428.8	33183.2	33641.6	34076.3	34431	34844.5	35092.5	34905.8	35224.3	35044.2	35113	35005.1	34654.9	34426.7	34272.7	33782	33464	33145.5	32813.3	32336.8	32108.4	31632	31405.3	30803	30614.5	30058.1	29829.2	29277.6
	433	30267.2	31268.4	31899.2	32885.1	33650.1	34115	34555.8	34915.4	35334.7	35586.3	35396.9	35719.9	35537.2	35607.1	35497.6	35142.5	34911.1	34754.9	34257.3	33934.9	33611.9	33275	32791.8	32560.2	32077	31847.2	31236.4	31045.2	30481	30249	29689.5
	434	30778.5	31796.7	32438.1	33440.7	34218.6	34691.3	35139.6	35505.3	35931.7	36187.5	35994.9	36323.4	36137.6	36208.6	36097.3	35736.2	35500.9	35342.1	34836.1	34508.2	34179.7	33837.2	33345.8	33110.2	32618.9	32385.3	31764.1	31569.7	30996	30760	30191.1
	435	31393.1	32431.5	33085.8	34108.3	34901.8	35383.9	35841.2	36214.2	36649.1	36910	36713.6	37048.6	36859.1	36931.6	36818	36449.7	36209.7	36047.7	35531.6	35197.2	34862.1	34512.8	34011.6	33771.3	33270.2	33031.9	32398.3	32200	31614.9	31374.1	30793.9
	436	31654.3	32701.4	33361.1	34392.2	35192.2	35678.4	36139.4	36515.6	36954.1	37217.1	37019.1	37356.9	37165.9	37238.9	37124.4	36753	36511	36347.7	35827.3	35490.1	35152.3	34800	34294.6	34052.3	33547.1	33306.7	32667.9	32468	31877.9	31635.2	31050.1
	437	32185	33249.6	33920.4	34968.8	35782.2	36276.5	36745.3	37127.8	37573.6	37841.1	37639.7	37983.2	37788.9	37863.2	37746.8	37369.2	37123.1	36957.1	36427.9	36085.1	35741.6	35383.4	34869.6	34623.2	34109.5	33865.1	33215.6	33012.3	32412.4	32165.6	31570.7
	438	32856.2	33943	34627.8	35698	36528.4	37033	37511.6	37902	38357.2	38630.2	38424.7	38775.3	38577	38652.8	38533.9	38148.5	37897.3	37727.8	37187.6	36837.6	36486.9	36121.3	35596.8	35345.3	34820.8	34571.3	33908.3	33700.7	33088.3	32836.4	32229.1
	439	33814.5	34933.1	35637.8	36739.3	37593.9	38113.3	38605.8	39007.6	39476	39757	39545.5	39906.3	39702.2	39780.3	39657.9	39261.2	39002.7	38828.2	38272.3	37912.1	37551.2	37174.9	36635.1	36376.2	35836.5	35579.7	34897.3	34683.7	34053.4	33794.2	33169.2
	440	34008.7	35133.6	35842.4	36950.2	37809.7	38332	38827.4	39231.5	39702.6	39985.2	39772.5	40135.4	39930.1	40008.6	39885.6	39486.6	39226.6	39051.1	38492	38129.7	37766.8	37388.3	36845.4	36585.1	36042.2	35784	35097.7	34882.9	34248.9	33988.2	33359.6
	441	34703.4	35851.3	36574.6	37705	38582	39115.1	39620.5	40032.9	40513.6	40802	40584.9	40955.3	40745.8	40825.9	40700.3	40293.2	40027.9	39848.8	39278.3	38908.6	38538.2	38152	37598	37332.4	36778.5	36515	35814.6	35595.4	34948.5	34682.4	34041
	442	35274.5	36441.3	37176.5	38325.5	39217	39758.8	40272.6	40691.7	41180.4	41473.5	41252.8	41629.3	41416.4	41497.8	41370.2	40956.3	40686.7	40504.7	39924.7	39548.9	39172.5	38779.9	38216.8	37946.8	37383.7	37115.9	36404	36181.2	35523.7	35253.2	34601.2
	443	35619	36797.2	37539.6	38699.8	39600	40147.1	40665.9	41089.1	41582.5	41878.6	41655.7	42035.8	41820.9	41903.1	41774.2	41356.3	41084	40900.2	40314.6	39935.2	39555.1	39158.6	38590	38317.4	37748.8	37478.4	36759.5	36534.6	35870.6	35597.5	34939.2
	444	35976.2	37166.3	37916	39087.9	39997.1	40549.7	41073.7	41501.2	41999.6	42298.5	42073.5	42457.4	42240.3	42323.3	42193.1	41771.1	41496	41310.4	40718.9	40335.7	39951.8	39551.4	38977	38701.7	38127.4	37854.3	37128.2	36901	36230.4	35954.5	35289.6
	445	36618.1	37829.4	38592.6	39785.4	40710.8	41273.3	41806.6	42241.7	42749	43053.3	42824.2	43215	42994	43078.5	42946	42516.4	42236.5	42047.5	41445.5	41055.4	40664.6	40257.1	39672.5	39392.2	38807.7	38529.7	37790.7	37559.4	36876.8	36596.1	35919.2
	446	37162.1	38391.4	39165.9	40376.4	41315.6	41886.4	42427.7	42869.3	43384.1	43692.9	43460.4	43857	43632.7	43718.5	43584	43148	42863.9	42672.2	42061.2	41665.3	41268.7	40855.1	40261.9	39977.4	39384.3	39102.1	38352.1	38117.4	37424.7	37139.7	36452.9
	447	37780.6	39030.4	39817.8	41048.4	42003.3	42583.6	43133.8	43582.8	44106.1	44420.1	44183.8	44586.9	44358.9	44446.1	44309.4	43866.1	43577.3	43382.4	42761.3	42358.8	41955.6	41535.1	40932	40642.8	40039.7	39752.9	38990.4	38751.8	38047.6	37757.9	37059.6
	448	38083.8	39343.6	40137.3	41377.8	42340.3	42925.3	43480	43932.5	44460.1	44776.6	44538.3	44944.7	44714.9	44802.8	44665	44218.2	43927	43730.5	43104.4	42698.7	42292.3	41868.4	41260.5	40968.9	40361.1	40071.9	39303.3	39062.8	38352.9	38060.9	37357
	449	38709	39989.5	40796.2	42057.1	43035.4	43629.9	44193.7	44653.7	45189.9	45511.6	45269.5	45682.5	45448.9	45538.3	45398.2	44944.1	44648.1	44448.4	43812	43399.6	42986.5	42555.7	41937.8	41641.5	41023.6	40729.7	39948.5	39704	38982.5	38685.7	37970.2
	450	38472.4	39745	40546.8	41800	42772.3	43363.2	43923.6	44380.7	44913.7	45233.4	44992.7	45403.3	45171.1	45259.9	45120.7	44669.3	44375.2	44176.7	43544.2	43134.4	42723.8	42295.6	41681.4	41386.9	40772.9	40480.8	39704.3	39461.3	38744.2	38449.2	37738.1
	451	38411.1	39681.8	40482.3	41733.5	42704.2	43294.2	43853.7	44310.1	44842.2	45161.4	44921.1	45331	45099.2	45187.9	45048.9	44598.2	44304.6	44106.4	43474.9	43065.7	42655.8	42228.3	41615.1	41321.1	40708	40416.3	39641.1	39398.5	38682.5	38388	37678
	452	38693.3	39973.3	40779.7	42040.1	43018	43612.3	44175.9	44635.6	45171.6	45493.2	45251.1	45664.1	45430.5	45519.8	45379.8	44925.9	44630.1	44430.4	43794.3	43382.1	42969.2	42538.5	41920.8	41624.6	41007	40713.2	39932.4	39688	38966.7	38670	37954.9
	453	38609.2	39886.4	40691	41948.7	42924.4	43517.5	44079.8	44538.6	45073.4	45394.3	45152.8	45564.8	45331.7	45420.9	45281.2	44828.2	44533	44333.8	43699.1	43287.8	42875.7	42446	41829.7	41534.1	40917.9	40624.7	39845.5	39601.7	38882	38586	37872.3
	454	38585.7	39862.1	40666.2	41923.1	42898.3	43490.9	44053	44511.4	45046	45366.6	45125.2	45537	45304.1	45393.2	45253.6	44800.9	44505.9	44306.8	43672.4	43261.4	42849.6	42420.2	41804.2	41508.8	40892.9	40600	39821.3	39577.5	38858.3	38562.4	37849.3
	455	38504	39777.7	40580.2	41834.4	42807.5	43398.9	43959.7	44417.3	44950.6	45270.6	45029.8	45440.6	45208.3	45297.1	45157.8	44706.1	44411.7	44213.1	43580	43169.8	42758.9	42330.4	41715.7	41421	40806.4	40514.1	39737	39493.8	38776.1	38480.8	37769.2
	456	37712.5	38960	39746	40974.4	41927.5	42506.7	43056	43504.1	44026.6	44340	44104.1	44506.5	44278.9	44365.9	44229.5	43787	43498.7	43304.1	42684.1	42282.4	41879.9	41460.2	40858.2	40569.5	39967.5	39681.2	38920.1	38681.9	37978.9	37689.8	36992.7
	457	37613.1	38857.3	39641.2	40866.3	41816.9	42394.7	42942.5	43389.4	43910.5	44223.1	43987.8	44389.1	44162.1	44249	44112.9	43671.6	43384	43190	42571.6	42170.9	41769.5	41350.9	40750.4	40462.5	39862.1	39576.6	38817.5	38579.9	37878.8	37590.4	36895.2
	458	37397.8	38634.9	39414.3	40632.5	41577.6	42152.1	42696.8	43141.1	43659.2	43970	43736	44135.1	43909.4	43995.7	43860.4	43421.7	43135.8	42942.8	42328	41929.6	41530.5	41114.2	40517.2	40231	39634	39350.1	38595.3	38359.1	37662	37375.3	36684
	459	36772.6	37989	38755.4	39953.2	40882.5	41447.3	41983	42419.9	42929.3	43234.9	43004.9	43397.3	43175.3	43260.2	43127.2	42695.7	42414.6	42224.9	41620.3	41228.6	40836.1	40426.9	39839.9	39558.4	38971.4	38692.2	37950.1	37717.8	37032.4	36750.4	36070.8
	460	36477.6	37684.3	38444.5	39632.7	40554.6	41114.9	41646.2	42079.6	42584.9	42888.1	42659.9	43049.1	42829	42913.2	42781.2	42353.2	42074.4	41886.2	41286.4	40897.8	40508.6	40102.6	39520.3	39241	38658.8	38381.8	37645.7	37415.3	36735.3	36455.6	35781.4
	[nm]	B06	X18
[nm]		470	471	472	473	474	475	476	477	478	479	480	481	482	483	484	485	486	487	488	489	490	491	492	493	494	495	496	497	498	499	500
	430	43585.4	45138.4	46205.7	47736.7	48950.4	49759	50487.9	51131.7	51849.1	52295.8	52131.8	52642.4	52412.9	52485	52404.2	51885.6	51583.6	51371.9	50683.3	50198	49750.8	49193.7	48494	48146	47475.5	47069.9	46161.4	45864.8	45016.7	44652.1	43827.3
	431	43761	45320.2	46391.9	47929	49147.6	49959.4	50691.3	51337.7	52058	52506.5	52341.8	52854.4	52624.1	52696.4	52615.3	52094.6	51791.5	51578.9	50887.5	50400.3	49951.2	49391.9	48689.4	48340	47666.7	47259.6	46347.4	46049.6	45198	44832	44003.8
	432	44415	45997.5	47085.2	48645.3	49882.2	50706.1	51448.9	52105	52836	53291.2	53124.1	53644.4	53410.6	53484	53401.7	52873.2	52565.5	52349.7	51648.1	51153.5	50697.8	50130.1	49417.1	49062.4	48379.1	47965.9	47040.1	46737.8	45873.5	45502.1	44661.5
	433	44940.6	46541.8	47642.4	49220.9	50472.4	51306.1	52057.7	52721.5	53461.2	53921.8	53752.7	54279.1	54042.5	54116.9	54033.6	53498.8	53187.5	52969.2	52259.2	51758.8	51297.7	50723.3	50001.8	49643	48951.6	48533.5	47596.7	47290.8	46416.4	46040.5	45189.9
	434	45865.2	47499.4	48622.6	50233.7	51510.9	52361.7	53128.8	53806.3	54561.2	55031.3	54858.7	55396	55154.5	55230.4	55145.3	54599.6	54281.9	54059	53334.5	52823.8	52353.2	51766.9	51030.6	50664.4	49958.8	49532.1	48576	48263.9	47371.4	46987.8	46119.8
	435	46655.1	48317.4	49460	51098.7	52398	53263.5	54043.7	54732.9	55500.8	55979	55803.4	56349.9	56104.3	56181.5	56095	55539.9	55216.6	54990	54252.9	53733.4	53254.7	52658.4	51909.4	51536.9	50819.1	50385	49412.5	49095	48187.2	47796.9	46914
	436	47074.4	48751.7	49904.5	51558	52868.9	53742.2	54529.5	55224.9	55999.7	56482.1	56305	56856.4	56608.6	56686.5	56599.2	56039.1	55713	55484.3	54740.6	54216.4	53733.4	53131.7	52376	52000.1	51275.9	50837.9	49856.7	49536.3	48620.3	48226.6	47335.7
	437	47908.1	49615.1	50788.3	52471.1	53805.3	54694	55495.2	56202.9	56991.4	57482.4	57302.2	57863.4	57611.2	57690.4	57601.6	57031.6	56699.6	56466.9	55710.1	55176.6	54685	54072.7	53303.6	52921.1	52184	51738.3	50739.7	50413.6	49481.4	49080.7	48174
	438	48898.4	50640.7	51838.1	53555.7	54917.4	55824.5	56642.3	57364.6	58169.4	58670.6	58486.6	59059.4	58802	58882.8	58792.2	58210.4	57871.6	57634.1	56861.6	56317.1	55815.4	55190.4	54405.4	54015	53262.7	52807.7	51788.5	51455.7	50504.2	50095.2	49169.8
	439	50246.8	52037.1	53267.6	55032.5	56431.8	57363.9	58204.3	58946.5	59773.5	60288.5	60099.4	60688	60423.5	60506.6	60413.5	59815.6	59467.5	59223.4	58429.6	57870.1	57354.5	56712.3	55905.7	55504.5	54731.4	54263.9	53216.6	52874.6	51896.9	51476.6	50525.7
	440	50630.6	52434.6	53674.5	55452.9	56862.9	57802.1	58648.9	59396.8	60230.1	60749	60558.5	61151.6	60885.1	60968.8	60874.9	60272.5	59921.7	59675.8	58875.9	58312.1	57792.6	57145.5	56332.7	55928.5	55149.5	54678.4	53623.1	53278.5	52293.3	51869.8	50911.6
	441	51584	53422	54685.2	56497.1	57933.6	58890.6	59753.3	60515.2	61364.3	61892.9	61698.9	62303.1	62031.5	62116.8	62021.2	61407.5	61050.1	60799.5	59984.6	59410.2	58880.9	58221.6	57393.5	56981.6	56188	55708.1	54632.8	54281.8	53278	52846.5	51870.3
	442	52451.4	54320.3	55604.8	57447.2	58907.8	59880.8	60758	61532.8	62396.1	62933.7	62736.4	63350.8	63074.6	63161.4	63064.2	62440.1	62076.7	61821.9	60993.2	60409.2	59871	59200.6	58358.6	57939.8	57132.8	56644.8	55551.5	55194.5	54173.9	53735.2	52742.5
	443	52901.8	54786.7	56082.2	57940.4	59413.6	60395	61279.7	62061.2	62931.9	63474.1	63275	63894.7	63616.2	63703.7	63605.6	62976.2	62609.7	62352.7	61517	60927.9	60385.1	59708.9	58859.7	58437.3	57623.4	57131.2	56028.5	55668.5	54639	54196.6	53195.4
	444	53416.3	55319.6	56627.7	58503.9	59991.4	60982.4	61875.7	62664.8	63543.9	64091.4	63890.4	64516.1	64234.9	64323.2	64224.2	63588.7	63218.6	62959.1	62115.2	61520.4	60972.4	60289.6	59432.1	59005.6	58183.8	57686.8	56573.4	56209.9	55170.4	54723.6	53712.7
	445	54377.4	56314.9	57646.5	59556.5	61070.8	62079.6	62989	63792.3	64687.2	65244.6	65040	65676.9	65390.7	65480.6	65379.8	64732.8	64356.1	64091.9	63232.8	62627.3	62069.4	61374.4	60501.4	60067.3	59230.7	58724.7	57591.3	57221.2	56163.1	55708.3	54679.2
	446	55152.9	57118	58468.7	60405.9	61941.8	62965	63887.3	64702	65609.8	66175.1	65967.5	66613.6	66323.2	66414.5	66312.2	65656	65273.9	65005.9	64134.7	63520.5	62954.6	62249.7	61364.3	60923.9	60075.4	59562.3	58412.6	58037.3	56964.1	56502.8	55459
	447	56040.3	58037	59409.4	61377.8	62938.4	63978	64915.2	65743.1	66665.4	67239.8	67028.9	67685.4	67390.3	67483	67379.1	66712.4	66324.1	66051.9	65166.5	64542.5	63967.5	63251.2	62351.6	61904.2	61042	60520.6	59352.5	58971.1	57880.6	57411.9	56351.3
	448	56466	58477.9	59860.7	61844.1	63416.6	64464.1	65408.4	66242.5	67171.9	67750.6	67538.1	68199.6	67902.3	67995.7	67891	67219.2	66828	66553.7	65661.6	65032.9	64453.5	63731.8	62825.3	62374.4	61505.7	60980.4	59803.4	59419.1	58320.3	57848	56779.4
	449	57347.8	59391.1	60795.5	62809.8	64406.8	65470.7	66429.8	67276.9	68220.8	68808.5	68592.8	69264.5	68962.6	69057.4	68951.1	68268.8	67871.5	67592.9	66686.9	66048.4	65459.9	64726.9	63806.3	63348.4	62466.1	61932.6	60737.2	60346.9	59231	58751.3	57666
	450	57009.3	59040.5	60436.6	62439.1	64026.7	65084.2	66037.7	66879.8	67818.1	68402.4	68187.9	68855.7	68555.6	68649.8	68544.2	67865.9	67470.9	67193.9	66293.3	65658.5	65073.6	64344.9	63429.7	62974.5	62097.5	61567	60378.7	59990.7	58881.4	58404.5	57325.6
	451	56890.7	58917.7	60310.9	62309.2	63893.5	64948.8	65900.3	66740.7	67677	68260.1	68046	68712.4	68413	68507	68401.6	67724.7	67330.5	67054.1	66155.4	65521.9	64938.2	64211	63297.8	62843.5	61968.3	61438.9	60253.1	59865.9	58758.9	58283	57206.4
	452	57241	59280.6	60682.3	62692.9	64287	65348.8	66306.2	67151.7	68093.8	68680.5	68465.1	69135.6	68834.3	68928.9	68822.8	68141.8	67745.2	67467.1	66562.8	65925.5	65338.1	64606.5	63687.6	63230.5	62349.9	61817.3	60624.2	60234.6	59120.8	58642	57558.7
	453	57153.1	59189.5	60589.1	62596.6	64188.2	65248.4	66204.2	67048.5	67989.2	68574.9	68359.9	69029.4	68728.5	68823	68717.1	68037	67641.1	67363.4	66460.5	65824.1	65237.7	64507.2	63589.7	63133.4	62254.1	61722.3	60531	60142	59029.9	58551.9	57470.2
	454	57145.1	59181.2	60580.6	62587.8	64179.2	65239.3	66195	67039.1	67979.7	68565.3	68350.3	69019.7	68718.9	68813.4	68707.4	68027.5	67631.6	67354	66451.2	65814.9	65228.6	64498.2	63580.8	63124.5	62245.4	61713.7	60522.5	60133.6	59021.6	58543.7	57462.2
	455	56910.5	58938.3	60331.9	62330.9	63915.8	64971.5	65923.3	66764	67700.6	68283.9	68069.8	68736.4	68436.8	68530.9	68425.4	67748.3	67354	67077.5	66178.5	65544.8	64960.8	64233.4	63319.8	62865.4	61989.9	61460.4	60274.1	59886.8	58779.4	58303.4	57226.3
	456	55797.6	57785.7	59152.1	61112	62665.8	63700.9	64634.1	65458.3	66376.7	66948.6	66738.6	67392.2	67098.5	67190.8	67087.3	66423.4	66036.9	65765.8	64884.3	64263	63690.5	62977.3	62081.6	61636.1	60777.6	60258.5	59095.4	58715.7	57629.9	57163.2	56107.2
	457	55684.3	57668.4	59032	60987.9	62538.6	63571.6	64502.9	65325.5	66242	66812.7	66603.1	67255.4	66962.3	67054.4	66951.1	66288.6	65902.8	65632.3	64752.6	64132.6	63561.2	62849.5	61955.6	61510.9	60654.3	60136.2	58975.4	58596.5	57512.9	57047.2	55993.3
	458	55403.7	57377.8	58734.6	60680.6	62223.5	63251.3	64177.9	64996.3	65908.2	66476	66267.5	66916.5	66624.9	66716.5	66613.8	65954.6	65570.7	65301.6	64426.3	63809.4	63240.9	62532.8	61643.4	61201	60348.6	59833.1	58678.3	58301.2	57223.1	56759.7	55711.2
	459	54634.4	56581.1	57919	59838.1	61359.5	62373	63286.7	64093.8	64993	65553	65347.4	65987.4	65699.7	65790.1	65688.8	65038.8	64660.3	64394.8	63531.7	62923.4	62362.8	61664.5	60787.4	60351.2	59510.7	59002.3	57863.5	57491.7	56428.6	55971.6	54937.6
	460	54266.8	56200.3	57529.2	59435.4	60946.6	61953.3	62860.8	63662.5	64555.6	65111.8	64907.6	65543.3	65257.6	65347.3	65246.8	64601.1	64225.1	63961.5	63104.2	62499.9	61943.1	61249.5	60378.3	59945	59110.2	58605.3	57474.1	57104.8	56048.8	55594.9	54567.9
	[nm]	B07	X19
[nm]		470	471	472	473	474	475	476	477	478	479	480	481	482	483	484	485	486	487	488	489	490	491	492	493	494	495	496	497	498	499	500
	430	58279.7	60393.9	61999.2	64147	65975.1	67188.9	68327.3	69206.7	70342.5	71125.4	70816.5	71566.7	71381.8	71574.9	71487.1	70906.5	70474	70219	69273.3	68643.3	68033.1	67352.8	66375.6	65887.4	64927.8	64508.1	63251.5	62720.8	61651.3	61124.7	60059.4
	431	58367.4	60484.8	62092.6	64243.6	66074.5	67290.1	68430.2	69310.9	70448.4	71232.4	70923.1	71674.4	71489.2	71682.7	71594.8	71013.3	70580.1	70324.8	69377.6	68746.6	68135.5	67454.2	66475.5	65986.6	65025.5	64605.2	63346.7	62815.2	61744.1	61216.7	60149.8
	432	59087.1	61230.6	62858.2	65035.8	66889.2	68119.9	69274	70165.6	71317.1	72110.8	71797.6	72558.3	72370.8	72566.6	72477.6	71889	71450.5	71191.9	70233.1	69594.3	68975.7	68286	67295.3	66800.3	65827.4	65401.9	64127.9	63589.8	62505.4	61971.6	60891.5
	433	59764.3	61932.3	63578.6	65781.1	67655.8	68900.5	70067.9	70969.7	72134.4	72937.2	72620.4	73389.8	73200.1	73398.2	73308.2	72712.8	72269.3	72007.8	71038	70391.9	69766.2	69068.5	68066.5	67565.8	66581.8	66151.4	64862.8	64318.5	63221.7	62681.8	61589.3
	434	60779.2	62984.1	64658.3	66898.2	68804.7	70070.6	71257.8	72175	73359.5	74175.9	73853.7	74636.1	74443.3	74644.7	74553.2	73947.7	73496.6	73230.7	72244.4	71587.3	70951	70241.5	69222.4	68713.3	67712.5	67274.8	65964.3	65410.8	64295.4	63746.3	62635.3
	435	61833	64076.1	65779.3	68058	69997.6	71285.5	72493.2	73426.3	74631.3	75461.9	75134.1	75930.1	75733.9	75938.8	75845.7	75229.7	74770.8	74500.3	73496.9	72828.4	72181.1	71459.3	70422.5	69904.5	68886.4	68441.1	67108	66544.8	65410.1	64851.5	63721.2
	436	62187.1	64443.1	66156.1	68447.9	70398.6	71693.8	72908.5	73846.9	75058.8	75894.1	75564.5	76365	76167.7	76373.8	76280.1	75660.6	75199.1	74927	73917.9	73245.6	72594.5	71868.6	70825.9	70305	69281	68833.2	67492.3	66926	65784.8	65222.9	64086.2
	437	63133	65423.3	67162.3	69489	71469.3	72784.2	74017.4	74970.1	76200.5	77048.5	76713.8	77526.6	77326.2	77535.5	77440.4	76811.4	76342.9	76066.7	75042.2	74359.7	73698.7	72961.7	71903.2	71374.3	70334.8	69880.1	68518.9	67944	66785.4	66215	65061
	438	64390.4	66726.3	68500	70872.9	72892.8	74233.8	75491.6	76463.2	77718.1	78583	78241.7	79070.6	78866.3	79079.7	78982.7	78341.2	77863.4	77581.7	76536.7	75840.6	75166.5	74414.9	73335.2	72795.8	71735.6	71271.9	69883.6	69297.1	68115.5	67533.7	66356.7
	439	66080.6	68477.8	70298	72733.3	74806.1	76182.4	77473.2	78470.3	79758.2	80645.8	80295.5	81146.2	80936.5	81155.5	81056	80397.6	79907.2	79618.1	78545.8	77831.4	77139.6	76368.2	75260.2	74706.7	73618.6	73142.7	71718	71116.2	69903.5	69306.5	68098.6
	440	66399.7	68808.4	70637.5	73084.5	75167.3	76550.3	77847.3	78849.2	80143.2	81035.1	80683.2	81538	81327.3	81547.3	81447.3	80785.8	80293.1	80002.5	78925	78207.2	77512	76736.9	75623.6	75067.4	73974.1	73495.9	72064.2	71459.5	70241	69641.1	68427.4
	441	67632.6	70086.1	71949	74441.5	76563	77971.6	79292.7	80313.3	81631.3	82539.8	82181.3	83051.9	82837.3	83061.5	82959.6	82285.8	81783.9	81488	80390.5	79659.4	78951.3	78161.8	77027.8	76461.2	75347.6	74860.5	73402.3	72786.4	71545.2	70934.2	69697.9
	442	68563.6	71050.9	72939.5	75466.3	77617	79045	80384.3	81418.9	82755.1	83676	83312.6	84195.2	83977.7	84204.9	84101.6	83418.6	82909.8	82609.8	81497.2	80755.9	80038.1	79237.8	78088.2	77513.8	76384.8	75891.1	74412.8	73788.4	72530.1	71910.7	70657.4
	443	68993.6	71496.5	73397	75939.6	78103.8	79540.8	80888.4	81929.5	83274.1	84200.8	83835.1	84723.3	84504.4	84733	84629.1	83941.8	83429.8	83127.9	82008.3	81262.4	80540.1	79734.7	78577.9	77999.9	76863.9	76367	74879.5	74251.1	72985	72361.7	71100.5
	444	69576.3	72100.3	74016.8	76580.9	78763.4	80212.5	81571.5	82621.4	83977.3	84911.9	84543.1	85438.8	85218	85448.6	85343.8	84650.7	84134.3	83829.9	82700.9	81948.7	81220.3	80408.1	79241.5	78658.6	77513	77012	75511.8	74878.2	73601.4	72972.8	71701
	445	70690.6	73255	75202.2	77807.4	80024.8	81497.1	82878	83944.6	85322.3	86271.8	85897.2	86807.2	86582.8	86817.1	86710.7	86006.4	85481.8	85172.5	84025.4	83261.2	82521.1	81695.9	80510.6	79918.4	78754.5	78245.4	76721.2	76077.4	74780.2	74141.5	72849.3
	446	71617.8	74215.9	76188.6	78828	81074.5	82566.1	83965	85045.7	86441.5	87403.4	87023.8	87945.8	87718.5	87955.9	87848	87134.5	86603	86289.7	85127.5	84353.3	83603.5	82767.5	81566.6	80966.7	79787.5	79271.7	77727.5	77075.3	75761	75114	73804.9
	447	72545.1	75176.8	77175.1	79848.6	82124.2	83635.2	85052.2	86146.9	87560.7	88535.1	88150.6	89084.5	88854.3	89094.7	88985.4	88262.7	87724.4	87407	86229.7	85445.5	84686	83839.1	82622.8	82015	80820.5	80298.1	78733.9	78073.3	76742	76086.5	74760.5
	448	73033.9	75683.4	77695.1	80386.6	82677.6	84198.7	85625.3	86727.3	88150.7	89131.7	88744.6	89684.7	89453	89695	89585	88857.4	88315.4	87995.9	86810.7	86021.2	85256.6	84404	83179.5	82567.6	81365.1	80839.1	79264.5	78599.3	77259.1	76599.2	75264.2
	449	74088.6	76776.3	78817.2	81547.5	83871.6	85414.7	86861.8	87979.8	89423.7	90418.9	90026.2	90979.9	90744.8	90990.4	90878.8	90140.7	89590.9	89266.7	88064.4	87263.5	86487.8	85623	84380.7	83760.1	82540.1	82006.6	80409.2	79734.4	78374.8	77705.4	76351.2
	450	73433.7	76097.7	78120.5	80826.7	83130.2	84659.6	86094	87202.1	88633.2	89619.6	89230.4	90175.7	89942.7	90186.1	90075.4	89343.9	88798.9	88477.6	87286	86492.1	85723.3	84866.1	83634.8	83019.6	81810.5	81281.7	79698.4	79029.6	77682	77018.5	75676.2
	451	73150	75803.7	77818.6	80514.4	82809	84332.5	85761.4	86865.2	88290.8	89273.4	88885.6	89827.3	89595.2	89837.6	89727.4	88998.7	88455.8	88135.8	86948.7	86157.9	85392.1	84538.2	83311.7	82698.9	81494.4	80967.6	79390.5	78724.3	77381.9	76721	75383.9
	452	73532	76199.5	78225	80934.8	83241.4	84772.9	86209.2	87318.8	88751.8	89739.5	89349.8	90296.3	90063	90306.7	90196	89463.4	88917.7	88596	87402.7	86607.8	85838	84979.6	83746.7	83130.7	81920	81390.4	79805	79135.3	77785.9	77121.6	75777.5
	453	73277.2	75935.4	77953.9	80654.4	82953	84479.1	85910.5	87016.2	88444.3	89428.5	89040.1	89983.5	89750.9	89993.8	89883.4	89153.4	88609.6	88289	87099.9	86307.7	85540.5	84685.1	83456.5	82842.7	81636.1	81108.4	79528.5	78861.1	77516.4	76854.3	75514.9
	454	73257	75914.5	77932.5	80632.2	82930.1	84455.9	85886.8	86992.2	88419.9	89403.9	89015.6	89958.7	89726.2	89969	89858.7	89128.9	88585.2	88264.7	87075.9	86284	85517	84661.8	83433.5	82819.9	81613.6	81086.1	79506.6	78839.4	77495.1	76833.2	75494.1
	455	72945.1	75591.3	77600.6	80288.8	82577	84096.3	85521.1	86621.8	88043.4	89023.2	88636.6	89575.6	89344.2	89585.9	89476	88749.3	88208	87888.8	86705.1	85916.5	85152.8	84301.3	83078.3	82467.2	81266.1	80740.8	79168	78503.7	77165.1	76506	75172.6
	456	71503.9	74097.9	76067.5	78702.6	80945.6	82434.8	83831.5	84910.5	86304	87264.5	86885.5	87806	87579.1	87816	87708.3	86996	86465.3	86152.5	84992.2	84219.2	83470.5	82635.9	81437	80838	79660.6	79145.7	77604	76952.8	75640.6	74994.5	73687.5
	457	71271.3	73856.8	75820.1	78446.6	80682.3	82166.7	83558.8	84634.3	86023.3	86980.6	86602.8	87520.3	87294.2	87530.4	87423	86713	86184.1	85872.3	84715.7	83945.2	83199	82367.1	81172.1	80575	79401.5	78888.2	77351.5	76702.4	75394.5	74750.6	73447.8
	458	70996.8	73572.4	75528	78144.4	80371.5	81850.2	83237	84308.3	85691.9	86645.6	86269.3	87183.2	86957.9	87193.2	87086.3	86379	85852.1	85541.5	84389.4	83621.9	82878.5	82049.8	80859.4	80264.6	79095.6	78584.3	77053.6	76407	75104.1	74462.7	73164.9
	459	69977.1	72515.6	74443.2	77022	79217.1	80674.5	82041.4	83097.3	84461.1	85401	85030.1	85931	85708.9	85940.8	85835.4	85138.3	84619	84312.8	83177.2	82420.8	81688.1	80871.3	79698	79111.8	77959.5	77455.6	75946.8	75309.5	74025.4	73393.1	72114
	460	69602.9	72127.9	74045.2	76610.2	78793.6	80243.2	81602.8	82653.1	84009.5	84944.5	84575.5	85471.5	85250.7	85481.4	85376.5	84683.1	84166.6	83862.1	82732.6	81980.1	81251.4	80438.9	79271.9	78688.8	77542.7	77041.5	75540.8	74906.9	73629.6	73000.7	71728.5
	[nm]	B08	X20
[nm]		470	471	472	473	474	475	476	477	478	479	480	481	482	483	484	485	486	487	488	489	490	491	492	493	494	495	496	497	498	499	500
	430	46136.4	47828.9	49068.4	50746.7	52054.9	52937.4	53801	54429.9	55184.3	55717.1	55480.1	56028.4	55767.6	55860.5	55761.3	55210.2	54875.8	54661.2	53883.6	53402.2	52811	52266.6	51557	51133.5	50402	50028.7	49064.5	48728.3	47868.8	47481.7	46659.9
	431	46327.6	48027.1	49271.7	50956.9	52270.6	53156.7	54023.9	54655.5	55413	55947.9	55710	56260.6	55998.7	56091.9	55992.4	55438.9	55103.2	54887.7	54106.9	53623.5	53029.8	52483.1	51770.6	51345.4	50610.8	50236	49267.8	48930.2	48067.1	47678.4	46853.2
	432	46937.1	48659	49920	51627.3	52958.3	53856.1	54734.7	55374.5	56142	56684	56442.9	57000.8	56735.4	56829.9	56729	56168.3	55828.1	55609.8	54818.7	54329	53727.5	53173.6	52451.7	52020.9	51276.6	50896.9	49916	49573.9	48699.5	48305.7	47469.7
	433	47533.9	49277.7	50554.8	52283.8	53631.7	54540.9	55430.7	56078.7	56855.9	57404.8	57160.6	57725.6	57456.9	57552.5	57450.4	56882.6	56538	56317	55515.8	55019.8	54410.7	53849.8	53118.7	52682.4	51928.7	51544.1	50550.7	50204.3	49318.8	48920	48073.3
	434	48399.3	50174.8	51475.1	53235.7	54608.1	55533.8	56439.8	57099.6	57891	58449.9	58201.2	58776.5	58502.9	58600.2	58496.3	57918.1	57567.3	57342.2	56526.4	56021.5	55401.3	54830.1	54085.7	53641.5	52874	52482.4	51471	51118.3	50216.6	49810.6	48948.5
	435	49233.1	51039.2	52361.9	54152.8	55548.9	56490.5	57412.1	58083.3	58888.3	59456.8	59203.9	59789.1	59510.7	59609.8	59504	58915.9	58559.1	58330.1	57500.2	56986.6	56355.7	55774.7	55017.5	54565.6	53784.9	53386.6	52357.7	51998.9	51081.7	50668.7	49791.7
	436	49637.1	51458	52791.6	54597.2	56004.7	56954.1	57883.3	58559.9	59371.5	59944.7	59689.8	60279.7	59999.1	60099	59992.3	59399.4	59039.6	58808.7	57972.1	57454.2	56818.2	56232.4	55469	55013.4	54226.3	53824.7	52787.4	52425.7	51500.9	51084.5	50200.3
	437	50439.4	52289.8	53644.9	55479.7	56910	57874.7	58818.9	59506.5	60331.2	60913.7	60654.6	61254.1	60968.9	61070.4	60962	60359.5	59993.9	59759.3	58909.2	58382.9	57736.6	57141.3	56365.6	55902.6	55102.8	54694.7	53640.6	53273.1	52333.4	51910.2	51011.8
	438	51493.7	53382.8	54766.2	56639.3	58099.5	59084.4	60048.3	60750.3	61592.2	62186.9	61922.4	62534.4	62243.3	62346.9	62236.2	61621.1	61247.9	61008.4	60140.5	59603.2	58943.4	58335.7	57543.7	57071.1	56254.6	55837.9	54761.8	54386.6	53427.3	52995.2	52078
	439	52934.6	54876.5	56298.6	58224.2	59725.2	60737.7	61728.5	62450.2	63315.7	63927	63655	64284.2	63984.9	64091.4	63977.7	63345.4	62961.7	62715.5	61823.3	61271	60592.7	59968	59153.9	58668	57828.6	57400.4	56294.1	55908.4	54922.2	54478.1	53535.2
	440	53279.6	55234.2	56665.6	58603.7	60114.6	61133.6	62131	62857.3	63728.4	64343.7	64070	64703.3	64402.1	64509.3	64394.8	63758.3	63372.2	63124.4	62226.3	61670.4	60987.7	60358.9	59539.5	59050.5	58205.6	57774.6	56661.1	56272.9	55280.3	54833.3	53884.2
	441	54219.8	56208.9	57665.6	59637.9	61175.4	62212.4	63227.3	63966.5	64853	65479.1	65200.6	65845.1	65538.5	65647.6	65531.1	64883.4	64490.5	64238.3	63324.4	62758.7	62063.9	61424.1	60590.2	60092.5	59232.8	58794.1	57661	57265.9	56255.8	55800.9	54835.1
	442	55068.9	57089.1	58568.6	60571.8	62133.3	63186.6	64217.4	64968.2	65868.6	66504.5	66221.6	66876.1	66564.8	66675.6	66557.3	65899.5	65500.4	65244.2	64316	63741.5	63035.8	62385.9	61539	61033.5	60160.3	59714.8	58563.9	58162.6	57136.7	56674.7	55693.8
	443	55579.7	57618.7	59111.9	61133.6	62709.7	63772.7	64813.1	65570.8	66479.6	67121.4	66835.9	67496.5	67182.3	67294.1	67174.7	66510.7	66107.9	65849.4	64912.6	64332.7	63620.5	62964.6	62109.8	61599.7	60718.4	60268.7	59107.2	58702.1	57666.7	57200.4	56210.4
	444	56104.4	58162.6	59669.9	61710.8	63301.7	64374.8	65425	66189.8	67107.2	67755	67466.9	68133.7	67816.5	67929.4	67808.8	67138.6	66732	66471.1	65525.4	64940.1	64221.1	63559	62696.2	62181.2	61291.6	60837.6	59665.2	59256.3	58211.1	57740.4	56741
	445	57026.1	59118.1	60650.2	62724.5	64341.6	65432.3	66499.8	67277.2	68209.6	68868.1	68575.2	69253	68930.6	69045.3	68922.8	68241.6	67828.3	67563	66601.8	66006.9	65276.1	64603.1	63726.1	63202.7	62298.4	61837	60645.3	60229.8	59167.4	58688.9	57673.2
	446	57834.5	59956.2	61510	63613.7	65253.7	66359.9	67442.5	68230.9	69176.5	69844.4	69547.3	70234.7	69907.7	70024.1	69899.8	69209	68789.8	68520.8	67546	66942.6	66201.5	65519	64629.5	64098.7	63181.6	62713.7	61505	61083.6	60006.1	59520.9	58490.7
	447	58652.3	60804	62379.7	64513.3	66176.4	67298.3	68396.2	69195.7	70154.7	70832	70530.8	71227.9	70896.3	71014.3	70888.3	70187.6	69762.5	69489.7	68501.2	67889.2	67137.6	66445.5	65543.4	65005.1	64075	63600.5	62374.8	61947.3	60854.7	60362.6	59317.8
	448	59164.7	61335.2	62924.7	65076.9	66754.6	67886.2	68993.7	69800.2	70767.6	71450.9	71146.9	71850.1	71515.7	71634.7	71507.6	70800.8	70372	70096.8	69099.6	68482.3	67724.2	67025.9	66116	65573	64634.8	64156.1	62919.7	62488.5	61386.3	60889.9	59836.1
	449	60034	62236.3	63849.2	66033	67735.3	68883.6	70007.4	70825.8	71807.4	72500.6	72192.3	72905.8	72566.4	72687.2	72558.2	71841	71405.9	71126.7	70114.8	69488.5	68719.2	68010.7	67087.4	66536.4	65584.4	65098.7	63844.1	63406.6	62288.2	61784.5	60715.2
	450	59638.4	61826.3	63428.5	65597.9	67289	68429.7	69546.1	70359.1	71334.2	72022.9	71716.6	72425.4	72088.2	72208.2	72080.1	71367.7	70935.4	70658	69652.8	69030.6	68266.4	67562.6	66645.4	66098	65152.3	64669.8	63423.4	62988.8	61877.8	61377.4	60315.1
	451	59526.6	61710.3	63309.6	65474.9	67162.9	68301.4	69415.7	70227.2	71200.5	71887.9	71582.1	72289.6	71953.1	72072.8	71944.9	71233.9	70802.4	70525.6	69522.2	68901.2	68138.4	67435.9	66520.4	65974	65030.1	64548.5	63304.5	62870.7	61761.8	61262.3	60202
	452	59915.5	62113.5	63723.2	65902.7	67601.7	68747.7	69869.2	70686	71665.7	72357.6	72049.8	72761.9	72423.2	72543.7	72415	71699.3	71265	70986.3	69976.5	69351.4	68583.6	67876.5	66955	66405.1	65455	64970.2	63718.1	63281.5	62165.3	61662.6	60595.4
	453	59881.4	62078.2	63686.9	65865.2	67563.2	68708.5	69829.4	70645.8	71624.9	72316.4	72008.8	72720.5	72382	72502.5	72373.8	71658.5	71224.5	70945.9	69936.6	69311.9	68544.5	67837.9	66916.9	66367.3	65417.8	64933.3	63681.9	63245.5	62129.9	61627.5	60560.9
	454	59858.2	62054.1	63662.2	65839.6	67537	68681.9	69802.3	70618.3	71597.1	72288.3	71980.8	72692.3	72353.9	72474.3	72345.7	71630.7	71196.8	70918.4	69909.5	69285	68517.9	67811.5	66891	66341.5	65392.4	64908.1	63657.1	63220.9	62105.8	61603.6	60537.4
	455	59723.3	61914.2	63518.8	65691.3	67384.8	68527.1	69645	70459.2	71435.7	72125.4	71818.6	72528.5	72190.8	72311	72182.7	71469.2	71036.4	70758.6	69752	69128.9	68363.5	67658.7	66740.2	66192	65245	64761.8	63513.7	63078.5	61965.9	61464.8	60401
	456	58635.5	60786.6	62361.9	64494.8	66157.5	67279	68376.6	69175.9	70134.7	70811.8	70510.6	71207.5	70876	70994	70868	70167.5	69742.6	69469.8	68481.6	67869.8	67118.4	66426.4	65524.7	64986.5	64056.7	63582.3	62356.9	61929.6	60837.3	60345.3	59300.9
	457	58641.2	60792.5	62368	64501.1	66164	67285.6	68383.3	69182.7	70141.5	70818.7	70517.5	71214.4	70882.9	71000.9	70874.9	70174.4	69749.4	69476.6	68488.3	67876.4	67125	66432.9	65531.1	64992.8	64062.9	63588.5	62363	61935.7	60843.2	60351.2	59306.7
	458	58482.6	60628.1	62199.3	64326.6	65985	67103.6	68198.3	68995.5	69951.8	70627.1	70326.7	71021.8	70691.2	70808.9	70683.2	69984.6	69560.7	69288.7	68303	67692.8	66943.4	66253.2	65353.8	64817	63889.7	63416.5	62194.3	61768.1	60678.6	60188	59146.2
	459	57786.2	59906.1	61458.6	63560.6	65199.2	66304.5	67386.1	68173.9	69118.8	69786.1	69489.2	70176	69849.3	69965.6	69841.5	69151.2	68732.4	68463.6	67489.6	66886.7	66146.2	65464.3	64575.5	64045.1	63128.8	62661.3	61453.7	61032.6	59956	59471.2	58441.9
	460	57571.5	59683.5	61230.2	63324.4	64957	66058.1	67135.8	67920.6	68862	69526.8	69231	69915.3	69589.8	69705.7	69582	68894.2	68477	68209.2	67238.8	66638.2	65900.4	65221	64335.6	63807.2	62894.3	62428.5	61225.3	60805.8	59733.3	59250.2	58224.8
	[nm]	B09	X21
[nm]		470	471	472	473	474	475	476	477	478	479	480	481	482	483	484	485	486	487	488	489	490	491	492	493	494	495	496	497	498	499	500
	430	54002.8	55946.7	57472.5	59517.7	61142.3	62255.2	63298.3	64109.8	65135.1	65797.7	65497.6	66231.3	66046.8	66218.1	66144.5	65538.1	65150.9	64942.9	64044.6	63406	62886.1	62180.7	61369.2	60894.7	60034.5	59605.8	58433.7	58063.7	57041	56516.1	55558.3
	431	53603.9	55533.4	57048	59078	60690.6	61795.4	62830.7	63636.2	64654	65311.7	65013.7	65742	65558.9	65728.9	65655.9	65054	64669.6	64463.1	63571.5	62937.6	62421.6	61721.4	60915.9	60444.9	59591	59165.5	58002	57634.8	56619.6	56098.6	55147.9
	432	54292.4	56246.7	57780.8	59836.9	61470.2	62589.1	63637.8	64453.6	65484.5	66150.6	65848.8	66586.5	66401	66573.2	66499.3	65889.6	65500.3	65291.2	64388.1	63746	63223.4	62514.2	61698.3	61221.3	60356.4	59925.5	58747.1	58375.1	57346.9	56819.2	55856.3
	433	54955.6	56933.8	58486.6	60567.8	62221.1	63353.7	64415.2	65241	66284.4	66958.7	66653.2	67399.9	67212.1	67386.5	67311.6	66694.5	66300.5	66088.8	65174.7	64524.7	63995.7	63277.8	62452	61969.2	61093.7	60657.5	59464.7	59088.2	58047.4	57513.3	56538.6
	434	55832	57841.7	59419.3	61533.7	63213.3	64364	65442.4	66281.3	67341.4	68026.4	67716.1	68474.7	68283.9	68461.1	68385	67758.1	67357.7	67142.6	66214	65553.7	65016.2	64286.9	63447.9	62957.4	62068	61624.8	60413	60030.5	58973.1	58430.4	57440.2
	435	56794.2	58838.6	60443.3	62594.1	64302.8	65473.2	66570.2	67423.6	68502	69198.8	68883.2	69654.8	69460.7	69640.9	69563.5	68925.8	68518.6	68299.8	67355.1	66683.4	66136.7	65394.8	64541.4	64042.4	63137.7	62686.9	61454.1	61065	59989.4	59437.4	58430.1
	436	57267.1	59328.4	60946.5	63115.3	64838.1	66018.3	67124.4	67985	69072.3	69774.9	69456.7	70234.7	70039	70220.7	70142.7	69499.7	69089	68868.4	67915.9	67238.6	66687.4	65939.3	65078.7	64575.6	63663.3	63208.8	61965.8	61573.4	60488.9	59932.3	58916.6
	437	58098	60189.3	61830.9	64031.1	65778.9	66976.3	68098.4	68971.5	70074.6	70787.4	70464.5	71253.9	71055.3	71239.7	71160.5	70508.1	70091.5	69867.7	68901.4	68214.3	67655	66896.1	66023.1	65512.6	64587.1	64126	62864.9	62466.9	61366.6	60801.9	59771.5
	438	59297.2	61431.6	63107.1	65352.7	67136.6	68358.7	69504	70395	71520.9	72248.5	71918.9	72724.6	72521.9	72710.1	72629.3	71963.4	71538.2	71309.8	70323.5	69622.2	69051.4	68276.8	67385.8	66864.8	65920.2	65449.5	64162.5	63756.2	62633.2	62056.9	61005.2
	439	60834.2	63023.9	64742.8	67046.6	68876.8	70130.5	71305.5	72219.7	73374.7	74121.1	73783	74609.6	74401.7	74594.7	74511.8	73828.7	73392.5	73158.2	72146.3	71426.8	70841.2	70046.6	69132.4	68597.9	67628.8	67146	65825.5	65408.8	64256.7	63665.4	62586.5
	440	61175.9	63378	65106.5	67423.3	69263.7	70524.5	71706.1	72625.4	73786.9	74537.5	74197.5	75028.7	74819.6	75013.8	74930.4	74243.5	73804.8	73569.1	72551.6	71828	71239.2	70440.1	69520.8	68983.2	68008.8	67523.2	66195.3	65776.2	64617.6	64023	62938
	441	62244.2	64484.7	66243.4	68600.6	70473.2	71756	72958.2	73893.6	75075.4	75839.1	75493.1	76338.8	76126.1	76323.6	76238.8	75539.9	75093.6	74853.8	73818.5	73082.3	72483.2	71670.1	70734.7	70187.8	69196.3	68702.2	67351.2	66924.8	65746	65141	64037.1
	442	63101.2	65372.5	67155.5	69545.2	71443.5	72744	73962.8	74911	76109.1	76883.3	76532.6	77389.9	77174.3	77374.5	77288.5	76580	76127.5	75884.4	74834.8	74088.5	73481.2	72656.9	71708.7	71154.2	70149.1	69648.2	68278.6	67846.2	66651.2	66037.9	64918.8
	443	63661.4	65952.9	67751.7	70162.6	72077.8	73389.8	74619.4	75576.1	76784.8	77565.9	77212.1	78077	77859.5	78061.5	77974.7	77259.9	76803.4	76558.1	75499.2	74746.3	74133.5	73302	72345.3	71785.9	70771.9	70266.5	68884.8	68448.6	67243	66624.2	65495.1
	444	64125.7	66433.9	68245.8	70674.3	72603.5	73925	75163.6	76127.2	77344.8	78131.6	77775.1	78646.4	78427.3	78630.7	78543.4	77823.3	77363.5	77116.5	76049.8	75291.4	74674.2	73836.5	72872.9	72309.5	71288	70779	69387.1	68947.8	67733.3	67110.1	65972.8
	445	65158.7	67504.1	69345.2	71812.8	73773	75115.9	76374.4	77353.5	78590.7	79390.2	79028	79913.3	79690.6	79897.4	79808.6	79076.9	78609.7	78358.7	77274.9	76504.3	75877.1	75025.9	74046.8	73474.3	72436.3	71919.1	70504.9	70058.4	68824.5	68191.1	67035.5
	446	66003.5	68379.3	70244.3	72743.9	74729.6	76089.8	77364.7	78356.5	79609.7	80419.5	80052.7	80949.5	80723.9	80933.4	80843.4	80102.3	79629	79374.7	78276.9	77496.3	76860.9	75998.7	75006.9	74427	73375.6	72851.7	71419	70966.8	69716.8	69075.3	67904.7
	447	66966.8	69377.3	71269.5	73805.6	75820.2	77200.3	78493.8	79500.1	80771.6	81593.2	81221	82130.9	81902	82114.5	82023.3	81271.3	80791.1	80533.2	79419.3	78627.3	77982.7	77107.9	76101.6	75513.2	74446.4	73914.9	72461.4	72002.6	70734.3	70083.4	68895.7
	448	67460.3	69888.6	71794.7	74349.5	76379	77769.3	79072.3	80086	81366.9	82194.6	81819.6	82736.2	82505.6	82719.7	82627.8	81870.3	81386.6	81126.7	80004.6	79206.8	78557.4	77676.2	76662.5	76069.7	74995.1	74459.6	72995.4	72533.2	71255.6	70599.9	69403.5
	449	68364.2	70825	72756.6	75345.6	77402.3	78811.2	80131.7	81159	82457	83295.8	82915.8	83844.7	83611.1	83828	83734.8	82967.2	82477	82213.6	81076.5	80268	79609.9	78716.9	77689.6	77088.9	75999.9	75457.2	73973.4	73505	72210.3	71545.8	70333.4
	450	67809.6	70250.4	72166.4	74734.4	76774.4	78171.9	79481.6	80500.6	81788.1	82620.1	82243.2	83164.5	82932.7	83147.9	83055.5	82294.1	81807.9	81546.6	80418.8	79616.8	78964.1	78078.3	77059.3	76463.5	75383.3	74845.1	73373.3	72908.7	71624.5	70965.4	69762.8
	451	67654	70089.3	72000.9	74563	76598.3	77992.6	79299.3	80315.9	81600.5	82430.6	82054.5	82973.7	82742.5	82957.2	82865	82105.3	81620.2	81359.6	80234.3	79434.2	78782.9	77899.2	76882.6	76288.1	75210.4	74673.4	73205	72741.5	71460.2	70802.6	69602.8
	452	68038.1	70487.2	72409.6	74986.3	77033.2	78435.4	79749.5	80771.9	82063.7	82898.5	82520.4	83444.8	83212.3	83428.2	83335.5	82571.5	82083.6	81821.5	80689.8	79885.1	79230.2	78341.5	77319	76721.2	75637.4	75097.4	73620.6	73154.4	71865.9	71204.6	69997.9
	453	67783.8	70223.7	72139	74706	76745.3	78142.2	79451.4	80470	81757	82588.7	82212	83132.9	82901.3	83116.4	83024	82262.9	81776.8	81515.7	80388.2	79586.6	78934.1	78048.7	77030.1	76434.5	75354.7	74816.7	73345.4	72881	71597.3	70938.5	69736.3
	454	67753.4	70192.2	72106.6	74672.5	76710.8	78107.2	79415.8	80433.9	81720.3	82551.6	82175.1	83095.6	82864.1	83079.1	82986.7	82226	81740.1	81479.1	80352.2	79550.9	78898.7	78013.6	76995.5	76400.2	75320.9	74783.1	73312.5	72848.3	71565.2	70906.6	69705
	455	67502.5	69932.2	71839.6	74395.9	76426.7	77817.8	79121.6	80136	81417.7	82245.9	81870.7	82787.8	82557.2	82771.4	82679.4	81921.4	81437.4	81177.3	80054.6	79256.2	78606.4	77724.7	76710.3	76117.2	75041.9	74506.1	73041	72578.5	71300.1	70644	69446.8
	456	66255.5	68640.4	70512.5	73021.6	75014.9	76380.3	77660.1	78655.7	79913.6	80726.6	80358.3	81258.5	81032.1	81242.3	81152.1	80408.1	79933	79677.8	78575.7	77792.1	77154.4	76288.9	75293.3	74711.1	73655.7	73129.8	71691.7	71237.8	69983	69339	68164
	457	66100.2	68479.5	70347.2	72850.5	74839.1	76201.3	77478	78471.3	79726.3	80537.4	80170	81068.1	80842.2	81051.9	80961.8	80219.6	79745.6	79491	78391.5	77609.8	76973.5	76110.1	75116.8	74536	73483.1	72958.4	71523.7	71070.8	69819	69176.5	68004.2
	458	65877.5	68248.8	70110.2	72605	74586.9	75944.6	77217	78206.9	79457.7	80266	79899.9	80794.9	80569.8	80778.9	80689.1	79949.4	79477	79223.2	78127.5	77348.3	76714.2	75853.7	74863.7	74284.9	73235.5	72712.6	71282.7	70831.4	69583.8	68943.4	67775.1
	459	64928.7	67265.8	69100.4	71559.3	73512.6	74850.8	76104.8	77080.5	78313.3	79110	78749.1	79631.3	79409.4	79615.4	79526.9	78797.8	78332.3	78082.2	77002.2	76234.3	75609.3	74761.1	73785.5	73215	72180.7	71665.3	70256	69811.2	68581.5	67950.4	66798.9
	460	64557.6	66881.3	68705.5	71150.3	73092.5	74422.9	75669.8	76639.9	77865.7	78657.8	78299	79176.1	78955.5	79160.3	79072.4	78347.5	77884.5	77635.9	76562.1	75798.5	75177.1	74333.8	73363.7	72796.5	71768.1	71255.7	69854.5	69412.2	68189.5	67562.1	66417.1
	[nm]	B10	X22
[nm]		470	471	472	473	474	475	476	477	478	479	480	481	482	483	484	485	486	487	488	489	490	491	492	493	494	495	496	497	498	499	500
	430	34762.4	35913.3	36654	37810.2	38654.3	39263	39711.6	40090.8	40629.5	40960	40681.3	41093.9	40861.3	40906.3	40789.8	40360.3	40096	39976.6	39371.3	39002.6	38612	38224.3	37676.5	37414.4	36815	36545.6	35857.1	35619.5	34996	34711.3	34069.7
	431	35024.4	36184.1	36930.3	38095.2	38945.7	39559	40011	40393	40935.7	41268.7	40988	41403.7	41169.3	41214.7	41097.3	40664.6	40398.2	40278	39668.1	39296.6	38903.1	38512.5	37960.5	37696.5	37092.5	36821.1	36127.4	35888	35259.8	34973	34326.6
	432	35501.9	36677.3	37433.8	38614.5	39476.6	40098.2	40556.4	40943.6	41493.8	41831.3	41546.7	41968.1	41730.5	41776.5	41657.5	41218.9	40948.9	40827	40208.9	39832.3	39433.4	39037.5	38478	38210.3	37598.2	37323	36619.9	36377.2	35740.5	35449.7	34794.5
	433	35976.6	37167.8	37934.3	39130.9	40004.5	40634.5	41098.7	41491.2	42048.7	42390.7	42102.3	42529.3	42288.5	42335.1	42214.6	41770.1	41496.5	41373	40746.6	40365	39960.7	39559.5	38992.5	38721.3	38101	37822.1	37109.6	36863.7	36218.4	35923.8	35259.8
	434	36609.6	37821.7	38601.8	39819.4	40708.3	41349.4	41821.8	42221.2	42788.5	43136.5	42843.1	43277.6	43032.6	43080	42957.3	42505.1	42226.6	42100.9	41463.5	41075.2	40663.8	40255.5	39678.6	39402.6	38771.3	38487.6	37762.5	37512.3	36855.7	36555.9	35880.2
	435	37375.4	38612.9	39409.3	40652.3	41559.9	42214.4	42696.7	43104.4	43683.5	44038.9	43739.3	44182.9	43932.8	43981.2	43855.9	43394.2	43110	42981.6	42330.8	41934.4	41514.4	41097.6	40508.6	40226.8	39582.4	39292.7	38552.5	38297	37626.6	37320.5	36630.7
	436	37682.8	38930.5	39733.4	40986.7	41901.7	42561.6	43047.9	43458.9	44042.8	44401.1	44099	44546.3	44294.1	44342.9	44216.6	43751.1	43464.5	43335.1	42679	42279.3	41855.8	41435.6	40841.8	40557.7	39907.9	39615.9	38869.5	38611.9	37936.1	37627.5	36932
	437	38340.4	39609.8	40426.7	41701.9	42632.8	43304.2	43799	44217.2	44811.3	45175.8	44868.5	45323.5	45067	45116.6	44988.2	44514.5	44222.9	44091.3	43423.7	43017	42586.2	42158.7	41554.4	41265.4	40604.3	40307.1	39547.8	39285.7	38598.1	38284.1	37576.4
	438	39153.3	40449.7	41283.9	42586.1	43536.8	44222.4	44727.7	45154.8	45761.5	46133.7	45819.9	46284.6	46022.5	46073.3	45942.1	45458.4	45160.6	45026.2	44344.4	43929.1	43489.2	43052.6	42435.5	42140.3	41465.2	41161.8	40386.3	40118.7	39416.5	39095.8	38373.2
	439	40237.6	41569.9	42427.2	43765.5	44742.5	45447.1	45966.4	46405.3	47028.8	47411.4	47088.8	47566.4	47297.1	47349.2	47214.4	46717.3	46411.3	46273.2	45572.5	45145.7	44693.6	44244.9	43610.7	43307.4	42613.6	42301.7	41504.8	41229.8	40508.1	40178.6	39435.9
	440	40597.6	41941.8	42806.8	44157	45142.8	45853.7	46377.6	46820.5	47449.6	47835.5	47510.1	47991.9	47720.3	47772.8	47636.8	47135.3	46826.5	46687.1	45980.2	45549.6	45093.4	44640.7	44000.9	43694.8	42994.8	42680.2	41876.1	41598.6	40870.5	40538	39788.7
	441	41334.8	42703.4	43584.1	44958.8	45962.5	46686.3	47219.8	47670.6	48311.1	48704.1	48372.8	48863.4	48586.8	48640.3	48501.8	47991.2	47676.8	47534.9	46815.1	46376.7	45912.2	45451.3	44799.9	44488.3	43775.5	43455.2	42636.5	42354	41612.6	41274.1	40511.2
	442	42077.5	43470.7	44367.3	45766.7	46788.4	47525.3	48068.3	48527.2	49179.3	49579.3	49242	49741.4	49459.8	49514.3	49373.4	48853.5	48533.5	48389	47656.4	47210.1	46737.2	46268	45604.9	45287.7	44562.1	44236	43402.7	43115	42360.4	42015.8	41239.2
	443	42450.1	43855.7	44760.1	46172	47202.7	47946.1	48493.9	48957	49614.7	50018.3	49678.1	50181.9	49897.8	49952.8	49810.6	49286.1	48963.3	48817.5	48078.4	47628.1	47151.1	46677.7	46008.7	45688.7	44956.7	44627.7	43787	43496.8	42735.5	42387.8	41604.3
	444	42924.4	44345.6	45260.2	46687.8	47730.1	48481.8	49035.7	49503.9	50169.1	50577.2	50233.1	50742.5	50455.3	50510.9	50367.1	49836.8	49510.3	49362.9	48615.5	48160.2	47677.9	47199.2	46522.7	46199.1	45459	45126.3	44276.2	43982.8	43212.9	42861.4	42069.1
	445	43695.4	45142.1	46073.1	47526.4	48587.4	49352.6	49916.5	50393.1	51070.2	51485.6	51135.3	51653.9	51361.5	51418.1	51271.7	50731.9	50399.6	50249.6	49488.7	49025.3	48534.3	48047	47358.4	47029	46275.5	45936.9	45071.5	44772.8	43989.1	43631.2	42824.8
	446	44354	45822.5	46767.6	48242.7	49319.7	50096.4	50668.8	51152.6	51839.9	52261.6	51906.1	52432.5	52135.7	52193.1	52044.5	51496.5	51159.2	51006.9	50234.6	49764.2	49265.8	48771.2	48072.1	47737.8	46973	46629.2	45750.8	45447.6	44652.1	44288.9	43470.2
	447	45115	46608.7	47570	49070.5	50165.9	50956	51538.2	52030.3	52729.4	53158.3	52796.7	53332.1	53030.2	53088.6	52937.5	52380.1	52037	51882.1	51096.5	50618	50111.1	49608	48897	48556.8	47778.9	47429.3	46535.8	46227.4	45418.2	45048.7	44216.1
	448	45539.7	47047.5	48017.8	49532.4	50638.2	51435.6	52023.3	52520	53225.7	53658.7	53293.6	53834.1	53529.4	53588.3	53435.8	52873.2	52526.8	52370.5	51577.5	51094.5	50582.7	50074.9	49357.2	49013.9	48228.7	47875.7	46973.8	46662.5	45845.7	45472.8	44632.3
	449	46224.1	47754.6	48739.5	50276.9	51399.3	52208.7	52805.2	53309.4	54025.7	54465.2	54094.6	54643.2	54333.9	54393.8	54238.9	53667.8	53316.3	53157.6	52352.7	51862.5	51343	50827.6	50099.1	49750.6	48953.5	48595.3	47679.8	47363.8	46534.8	46156.3	45303.1
	450	45995.7	47518.7	48498.7	50028.5	51145.3	51950.7	52544.3	53046	53758.8	54196.1	53827.4	54373.3	54065.5	54125	53970.9	53402.7	53052.9	52895	52094.1	51606.2	51089.3	50576.4	49851.5	49504.8	48711.7	48355.2	47444.2	47129.8	46304.9	45928.2	45079.3
	451	45928.2	47448.9	48427.5	49955	51070.2	51874.5	52467.2	52968.1	53679.8	54116.5	53748.3	54293.4	53986.1	54045.6	53891.7	53324.3	52975	52817.3	52017.6	51530.4	51014.3	50502.2	49778.3	49432.1	48640.2	48284.2	47374.6	47060.6	46236.9	45860.8	45013.1
	452	46260	47791.6	48777.3	50315.8	51439.1	52249.2	52846.2	53350.8	54067.6	54507.4	54136.6	54685.6	54376.1	54436	54281	53709.5	53357.7	53198.8	52393.3	51902.7	51382.8	50867	50137.9	49789.2	48991.5	48633	47716.8	47400.6	46570.9	46192	45338.2
	453	46205.7	47735.5	48720	50256.8	51378.7	52187.8	52784.1	53288.1	54004.1	54443.4	54073	54621.4	54312.2	54372.1	54217.3	53646.4	53295	53136.4	52331.8	51841.7	51322.5	50807.3	50079.1	49730.7	48934	48575.9	47660.8	47344.9	46516.2	46137.8	45285
	454	46245.1	47776.3	48761.6	50299.7	51422.6	52232.4	52829.2	53333.6	54050.2	54489.9	54119.2	54668	54358.6	54418.5	54263.5	53692.2	53340.5	53181.7	52376.5	51886	51366.3	50850.6	50121.8	49773.2	48975.8	48617.4	47701.5	47385.3	46555.9	46177.2	45323.7
	455	46113.7	47640.6	48623.1	50156.8	51276.5	52084	52679.1	53182.1	53896.7	54335.1	53965.5	54512.8	54204.2	54263.9	54109.4	53539.7	53189	53030.7	52227.7	51738.6	51220.4	50706.2	49979.4	49631.8	48836.6	48479.3	47566	47250.7	46423.7	46046	45194.9
	456	45281.3	46780.5	47745.3	49251.3	50350.8	51143.8	51728.1	52222	52923.7	53354.2	52991.2	53528.7	53225.6	53284.3	53132.6	52573.2	52228.8	52073.3	51284.9	50804.6	50295.7	49790.8	49077.2	48735.8	47955	47604.1	46707.3	46397.7	45585.6	45214.8	44379
	457	45157.3	46652.4	47614.6	49116.5	50213	51003.7	51586.5	52079	52778.8	53208.1	52846.1	53382.1	53079.9	53138.4	52987.1	52429.2	52085.8	51930.7	51144.4	50665.5	50158	49654.5	48942.8	48602.4	47823.7	47473.7	46579.4	46270.7	45460.8	45091	44257.5
	458	44910.1	46397.1	47354	48847.6	49938.1	50724.6	51304.1	51794	52489.9	52916.9	52556.9	53089.9	52789.4	52847.5	52697.1	52142.2	51800.7	51646.5	50864.5	50388.2	49883.5	49382.7	48674.9	48336.3	47561.9	47213.9	46324.4	46017.4	45212	44844.2	44015.3
	459	44261.2	45726.7	46669.8	48141.9	49216.6	49991.7	50562.8	51045.6	51731.5	52152.3	51797.5	52322.8	52026.6	52084	51935.7	51388.9	51052.2	50900.3	50129.6	49660.1	49162.7	48669.2	47971.6	47638	46874.7	46531.7	45655.1	45352.6	44558.7	44196.2	43379.3
	460	43934.3	45388.9	46325	47786.2	48853	49622.4	50189.3	50668.6	51349.4	51767.1	51414.9	51936.3	51642.3	51699.2	51552	51009.2	50675.1	50524.3	49759.3	49293.3	48799.6	48309.7	47617.3	47286	46528.5	46188	45317.8	45017.5	44229.6	43869.8	43058.9
	[nm]	B11	X23
[nm]		470	471	472	473	474	475	476	477	478	479	480	481	482	483	484	485	486	487	488	489	490	491	492	493	494	495	496	497	498	499	500
	430	33214.8	34363	35125.1	36215.4	37106.6	37710.4	38219	38645.1	39154.9	39544.1	39258.1	39682.8	39496.6	39546.8	39433.4	39070	38804	38649.7	38100.9	37733.5	37393.5	37004.2	36445.3	36167	35708.8	35369	34660.3	34450.2	33823	33546.7	32889.4
	431	33298.4	34449.4	35213.5	36306.5	37199.9	37805.3	38315.2	38742.3	39253.4	39643.6	39356.8	39782.6	39595.9	39646.2	39532.6	39168.2	38901.6	38746.9	38196.8	37828.4	37487.5	37097.3	36536.9	36258	35798.7	35457.9	34747.5	34536.9	33908.1	33631.1	32972.1
	432	33689.2	34853.8	35626.8	36732.6	37636.5	38249	38764.9	39197	39714.1	40108.9	39818.7	40249.5	40060.6	40111.6	39996.6	39627.9	39358.1	39201.7	38645.1	38272.4	37927.5	37532.7	36965.7	36683.5	36218.8	35874.1	35155.3	34942.2	34306	34025.8	33359.1
	433	34174.4	35355.7	36139.8	37261.6	38178.6	38799.8	39323.1	39761.5	40286	40686.5	40392.1	40829.1	40637.6	40689.2	40572.6	40198.6	39925	39766.2	39201.6	38823.6	38473.7	38073.2	37498.1	37211.8	36740.4	36390.7	35661.6	35445.4	34800.1	34515.8	33839.5
	434	34736.1	35936.8	36733.8	37874.1	38806.1	39437.5	39969.4	40415.1	40948.2	41355.2	41056	41500.2	41305.5	41358	41239.4	40859.3	40581.2	40419.8	39845.9	39461.7	39106	38699	38114.4	37823.4	37344.3	36988.8	36247.8	36028	35372.1	35083.1	34395.7
	435	35413	36637.2	37449.8	38612.2	39562.4	40206.1	40748.4	41202.7	41746.2	42161.2	41856.2	42309	42110.5	42164	42043.2	41655.7	41372.1	41207.6	40622.5	40230.8	39868.2	39453.2	38857.3	38560.6	38072.1	37709.7	36954.2	36730.2	36061.4	35766.9	35066.1
	436	35719.1	36953.9	37773.4	38945.9	39904.3	40553.6	41100.6	41558.8	42107	42525.6	42218	42674.7	42474.5	42528.5	42406.5	42015.7	41729.7	41563.8	40973.6	40578.5	40212.8	39794.2	39193.1	38893.9	38401.2	38035.6	37273.6	37047.7	36373.1	36076	35369.1
	437	36295	37549.6	38382.4	39573.8	40547.6	41207.4	41763.2	42228.8	42785.9	43211.2	42898.6	43362.7	43159.2	43214.1	43090.2	42693.1	42402.4	42233.8	41634.2	41232.7	40861.1	40435.8	39825	39520.9	39020.3	38648.8	37874.5	37644.9	36959.5	36657.6	35939.4
	438	37102.8	38385.3	39236.7	40454.6	41450.1	42124.6	42692.7	43168.7	43738.1	44172.9	43853.4	44327.8	44119.8	44175.9	44049.3	43643.3	43346.1	43173.8	42560.8	42150.4	41770.5	41335.7	40711.3	40400.5	39888.7	39509	38717.5	38482.8	37782.1	37473.5	36739.2
	439	38125.6	39443.5	40318.3	41569.8	42592.8	43285.8	43869.7	44358.8	44943.9	45390.7	45062.3	45549.8	45336.1	45393.7	45263.6	44846.4	44541.1	44364	43734.1	43312.4	42922	42475.3	41833.6	41514.2	40988.3	40598.2	39784.8	39543.7	38823.7	38506.6	37752
	440	38422.2	39750.4	40632	41893.2	42924.1	43622.6	44210.9	44703.8	45293.5	45743.8	45412.8	45904.2	45688.8	45746.8	45615.7	45195.2	44887.6	44709.1	44074.3	43649.3	43255.9	42805.7	42159.1	41837.2	41307.2	40914	40094.3	39851.3	39125.7	38806.1	38045.7
	441	39151.1	40504.5	41402.8	42688	43738.5	44450.2	45049.7	45551.9	46152.8	46611.6	46274.4	46775	46555.6	46614.7	46481.1	46052.7	45739.2	45557.3	44910.5	44477.4	44076.6	43617.8	42958.9	42630.9	42090.9	41690.2	40855	40607.3	39868	39542.3	38767.5
	442	39778	41153	42065.7	43371.4	44438.7	45161.8	45771	46281.3	46891.7	47357.9	47015.3	47523.9	47300.9	47361.1	47225.3	46790	46471.5	46286.7	45629.5	45189.5	44782.2	44316.1	43646.7	43313.5	42764.8	42357.7	41509.1	41257.5	40506.3	40175.4	39388.2
	443	40179.3	41568.2	42490.1	43809	44887.1	45617.5	46232.7	46748.2	47364.8	47835.7	47489.6	48003.4	47778.2	47838.9	47701.7	47262.1	46940.3	46753.7	46089.9	45645.5	45234	44763.2	44087	43750.4	43196.2	42785.1	41927.9	41673.7	40914.9	40580.7	39785.6
	444	40506.5	41906.7	42836.2	44165.8	45252.6	45989	46609.3	47128.9	47750.6	48225.3	47876.4	48394.4	48167.3	48228.5	48090.2	47647	47322.6	47134.5	46465.2	46017.2	45602.4	45127.8	44446.1	44106.8	43548	43133.5	42269.3	42013.1	41248.2	40911.2	40109.6
	445	41328.2	42756.9	43705.2	45061.8	46170.7	46922	47554.8	48085	48719.3	49203.6	48847.6	49376.1	49144.4	49206.9	49065.8	48613.6	48282.6	48090.7	47407.9	46950.7	46527.6	46043.3	45347.8	45001.5	44431.5	44008.5	43126.8	42865.4	42085	41741.2	40923.3
	446	41925.8	43375.1	44337.1	45713.3	46838.2	47600.4	48242.4	48780.2	49423.7	49915	49553.9	50090	49855	49918.4	49775.2	49316.5	48980.7	48786	48093.3	47629.6	47200.3	46709	46003.4	45652.2	45073.9	44644.8	43750.4	43485.2	42693.4	42344.7	41515
	447	42525.4	43995.4	44971.1	46367	47508	48281.1	48932.3	49477.8	50130.5	50628.8	50262.6	50806.3	50567.9	50632.2	50487.1	50021.7	49681.2	49483.7	48781.1	48310.7	47875.3	47377	46661.3	46305	45718.5	45283.3	44376	44107.1	43304	42950.3	42108.7
	448	42877.6	44359.7	45343.6	46751	47901.5	48681	49337.6	49887.6	50545.7	51048.1	50678.8	51227.1	50986.7	51051.6	50905.2	50436	50092.7	49893.5	49185.1	48710.8	48271.8	47769.3	47047.8	46688.6	46097.1	45658.3	44743.6	44472.4	43662.6	43306	42457.4
	449	43558.6	45064.3	46063.8	47493.6	48662.4	49454.2	50121.2	50680	51348.5	51859	51483.8	52040.8	51796.6	51862.4	51713.8	51237.1	50888.3	50686	49966.3	49484.5	49038.5	48528.1	47795.1	47430.1	46829.3	46383.6	45454.3	45178.7	44356.2	43993.8	43131.8
	450	43266.1	44761.7	45754.4	47174.7	48335.5	49122.1	49784.6	50339.6	51003.7	51510.7	51138	51691.3	51448.7	51514.1	51366.4	50893	50546.5	50345.6	49630.8	49152.2	48709.2	48202.2	47474.1	47111.6	46514.8	46072	45149	44875.3	44058.3	43698.4	42842.1
	451	43192.1	44685.2	45676.2	47094	48252.9	49038.1	49699.5	50253.6	50916.5	51422.6	51050.6	51602.9	51360.8	51426.1	51278.6	50806	50460.1	50259.5	49545.9	49068.2	48625.9	48119.8	47392.9	47031.1	46435.3	45993.3	45071.8	44798.6	43982.9	43623.7	42768.9
	452	43481.8	44984.9	45982.6	47409.9	48576.6	49367	50032.9	50590.7	51258	51767.5	51393	51949.1	51705.3	51771	51622.6	51146.8	50798.6	50596.6	49878.2	49397.3	48952.1	48442.5	47710.8	47346.5	46746.7	46301.8	45374.1	45099.1	44278	43916.3	43055.8
	453	43378.9	44878.4	45873.8	47297.7	48461.6	49250.2	49914.5	50470.9	51136.7	51645	51271.4	51826.1	51582.9	51648.5	51500.4	51025.8	50678.4	50476.9	49760.2	49280.4	48836.2	48327.9	47597.9	47234.5	46636.1	46192.2	45266.8	44992.4	44173.2	43812.4	42953.9
	454	43265.1	44760.7	45753.4	47173.6	48334.4	49121	49783.5	50338.5	51002.5	51509.5	51136.9	51690.1	51447.6	51513	51365.3	50891.9	50545.4	50344.5	49629.6	49151.1	48708.1	48201.1	47473	47110.5	46513.7	46071	45148	44874.3	44057.3	43697.4	42841.2
	455	43165	44657.1	45647.6	47064.5	48222.6	49007.3	49668.3	50222	50884.5	51390.3	51018.6	51570.5	51328.5	51393.8	51246.4	50774.1	50428.5	50228	49514.8	49037.4	48595.4	48089.6	47363.2	47001.5	46406.1	45964.4	45043.5	44770.5	43955.3	43596.3	42742.1
	456	42244.5	43704.9	44674.2	46060.9	47194.3	47962.3	48609.2	49151.1	49799.5	50294.5	49930.7	50470.9	50234	50297.9	50153.7	49691.4	49353.1	49156.9	48459	47991.7	47559.1	47064.1	46353.2	45999.3	45416.6	44984.3	44083	43815.8	43018	42666.7	41830.6
	457	42114.8	43570.6	44537	45919.4	47049.4	47815	48459.9	49000.2	49646.5	50140.1	49777.3	50315.9	50079.8	50143.4	49999.7	49538.8	49201.6	49006	48310.2	47844.3	47413.1	46919.6	46210.8	45858	45277.1	44846.1	43947.6	43681.3	42885.9	42535.6	41702.2
	458	41819.9	43265.6	44225.1	45597.9	46720	47480.2	48120.6	48657.1	49298.9	49789	49428.8	49963.5	49729.1	49792.3	49649.5	49191.9	48857.1	48662.8	47971.9	47509.3	47081.1	46591	45887.3	45536.9	44960.1	44532.1	43639.9	43375.4	42585.6	42237.8	41410.2
	459	41132	42553.8	43497.6	44847.8	45951.4	46699.1	47329	47856.6	48487.9	48969.9	48615.7	49141.6	48911	48973.2	48832.8	48382.7	48053.3	47862.3	47182.7	46727.8	46306.6	45824.6	45132.4	44787.8	44220.4	43799.5	42922	42661.8	41885.1	41543	40729
	460	40733	42141.1	43075.7	44412.8	45505.7	46246.2	46869.9	47392.5	48017.6	48494.9	48144.1	48665	48436.6	48498.2	48359.2	47913.5	47587.3	47398.1	46725.1	46274.5	45857.5	45380.1	44694.7	44353.4	43791.6	43374.7	42505.7	42248.1	41478.8	41140	40333.9
	[nm]	B12	X24
[nm]		470	471	472	473	474	475	476	477	478	479	480	481	482	483	484	485	486	487	488	489	490	491	492	493	494	495	496	497	498	499	500
	430	52339.3	54229.5	55600.4	57444.8	58962.6	59945.8	60886.9	61543.1	62464.8	63062.6	62746.6	63323.4	63104.5	63215.6	63112.4	62447.9	62112.2	61812.1	60913.2	60343.8	59768.3	59130.3	58261.1	57877.8	56977.9	56544.7	55474.9	55059.4	54076.2	53584.7	52637.4
	431	52572	54470.7	55847.6	57700.3	59224.8	60212.4	61157.7	61816.8	62742.6	63343.1	63025.6	63605.1	63385.1	63496.7	63393.1	62725.7	62388.5	62087	61184.1	60612.2	60034.1	59393.3	58520.2	58135.2	57231.3	56796.2	55721.6	55304.3	54316.7	53823	52871.5
	432	53306.4	55231.6	56627.8	58506.3	60052.1	61053.5	62012	62680.3	63619	64227.9	63906	64493.5	64270.6	64383.7	64278.6	63601.9	63260	62954.2	62038.8	61458.8	60872.7	60222.9	59337.6	58947.2	58030.8	57589.5	56500	56076.8	55075.4	54574.9	53610.1
	433	53983	55932.6	57346.5	59248.9	60814.3	61828.4	62799.1	63475.9	64426.5	65043.1	64717.1	65312.1	65086.3	65200.9	65094.5	64409.1	64062.9	63753.3	62826.2	62238.9	61645.3	60987.3	60090.8	59695.4	58767.3	58320.5	57217.1	56788.5	55774.5	55267.6	54290.5
	434	54936.7	56920.7	58359.6	60295.6	61888.7	62920.7	63908.5	64597.3	65564.7	66192.2	65860.4	66465.9	66236.1	66352.7	66244.5	65547	65194.6	64879.6	63936.1	63338.4	62734.4	62064.7	61152.4	60750	59805.5	59350.8	58227.9	57791.8	56759.8	56243.9	55249.6
	435	55989.4	58011.5	59478	61451	63074.6	64126.4	65133.2	65835.2	66821.1	67460.6	67122.5	67739.6	67505.4	67624.3	67513.9	66803.1	66444	66122.9	65161.3	64552.2	63936.5	63254.1	62324.2	61914.2	60951.6	60488.1	59343.7	58899.2	57847.5	57321.7	56308.4
	436	56486.4	58526.4	60005.9	61996.5	63634.5	64695.6	65711.3	66419.5	67414.2	68059.4	67718.3	68340.9	68104.6	68224.5	68113.2	67396	67033.7	66709.7	65739.7	65125.1	64504	63815.5	62877.4	62463.7	61492.6	61025	59870.4	59422	58360.9	57830.5	56808.2
	437	57400.7	59473.8	60977.2	63000	64664.5	65742.8	66775	67494.7	68505.5	69161.1	68814.5	69447.1	69207	69328.9	69215.7	68487	68118.8	67789.6	66803.8	66179.3	65548.2	64848.5	63895.2	63474.8	62488	62012.9	60839.6	60383.9	59305.6	58766.6	57727.8
	438	58656	60774.3	62310.6	64377.7	66078.6	67180.5	68235.2	68970.6	70003.5	70673.5	70319.3	70965.8	70720.4	70844.9	70729.3	69984.6	69608.4	69272	68264.7	67626.5	66981.6	66266.6	65292.5	64862.9	63854.5	63368.9	62170	61704.4	60602.5	60051.7	58990.1
	439	60235.1	62410.5	63988.2	66110.9	67857.6	68989.1	70072.2	70827.5	71888.2	72576.2	72212.4	72876.3	72624.4	72752.2	72633.5	71868.8	71482.4	71136.9	70102.5	69447.2	68784.9	68050.7	67050.3	66609.1	65573.6	65075	63843.8	63365.6	62234.1	61668.5	60578.3
	440	60664.4	62855.3	64444.2	66582.1	68341.2	69480.8	70571.6	71332.2	72400.5	73093.4	72727.1	73395.7	73142	73270.7	73151.2	72381	71991.9	71644	70602.1	69942.1	69275.1	68535.7	67528.2	67083.9	66040.9	65538.8	64298.8	63817.2	62677.6	62108	61010
	441	61830.7	64063.7	65683.2	67862.1	69655.1	70816.6	71928.4	72703.6	73792.4	74498.6	74125.3	74806.8	74548.1	74679.3	74557.5	73772.5	73375.9	73021.3	71959.4	71286.8	70606.9	69853.2	68826.4	68373.5	67310.5	66798.7	65534.9	65044.1	63882.6	63302	62182.9
	442	62747.3	65013.4	66656.9	68868.1	70687.7	71866.4	72994.7	73781.4	74886.3	75603.1	75224.1	75915.7	75653.3	75786.4	75662.8	74866.1	74463.7	74103.8	73026.2	72343.6	71653.6	70888.8	69846.7	69387.1	68308.4	67789	66506.4	66008.3	64829.6	64240.4	63104.8
	443	63406.7	65696.6	67357.3	69591.8	71430.5	72621.6	73761.7	74556.7	75673.3	76397.5	76014.6	76713.5	76448.3	76582.8	76457.9	75652.9	75246.2	74882.5	73793.6	73103.8	72406.6	71633.7	70580.7	70116.3	69026.2	68501.3	67205.3	66702	65510.9	64915.5	63767.9
	444	63916	66224.3	67898.4	70150.8	72004.3	73204.9	74354.2	75155.6	76281.1	77011.2	76625.2	77329.7	77062.3	77198	77072	76260.6	75850.6	75484	74386.4	73691	72988.2	72209.1	71147.6	70679.5	69580.7	69051.6	67745.2	67237.8	66037.1	65436.9	64280.1
	445	65074.2	67424.4	69128.8	71422	73309.1	74531.5	75701.6	76517.5	77663.4	78406.7	78013.8	78731	78458.8	78596.9	78468.7	77642.5	77225.1	76851.9	75734.3	75026.4	74310.8	73517.6	72436.9	71960.3	70841.5	70302.9	68972.8	68456.2	67233.8	66622.7	65444.9
	446	66006	68389.8	70118.6	72444.7	74358.7	75598.7	76785.6	77613.1	78775.5	79529.4	79130.8	79858.3	79582.2	79722.3	79592.2	78754.2	78330.8	77952.3	76818.7	76100.6	75374.8	74570.3	73474.1	72990.7	71855.9	71309.5	69960.4	69436.4	68196.4	67576.6	66382
	447	67045.9	69467.2	71223.3	73586	75530.2	76789.7	77995.2	78835.9	80016.5	80782.3	80377.4	81116.4	80836	80978.2	80846.1	79994.9	79564.9	79180.4	78028.9	77299.5	76562.3	75745.1	74631.6	74140.6	72987.9	72432.9	71062.5	70530.3	69270.8	68641.3	67427.8
	448	67524.3	69963	71731.6	74111.2	76069.2	77337.7	78551.9	79398.5	80587.6	81358.8	80951.1	81695.3	81412.9	81556.2	81423.1	80565.8	80132.7	79745.5	78585.8	77851.2	77108.7	76285.7	75164.3	74669.7	73508.8	72949.9	71569.7	71033.6	69765.2	69131.1	67909
	449	68672.6	71152.7	72951.4	75371.4	77362.8	78652.8	79887.6	80748.7	81957.9	82742.3	82327.6	83084.5	82797.3	82943	82807.7	81935.8	81495.4	81101.5	79922.2	79175	78419.9	77582.9	76442.4	75939.4	74758.8	74190.4	72786.7	72241.5	70951.5	70306.7	69063.8
	450	68193.5	70656.3	72442.4	74845.6	76823.1	78104.1	79330.3	80185.3	81386.2	82165.1	81753.3	82504.9	82219.6	82364.4	82230	81364.2	80926.8	80535.7	79364.6	78622.7	77872.8	77041.6	75909.1	75409.6	74237.3	73672.8	72278.9	71737.6	70456.5	69816.2	68582
	451	68035.4	70492.5	72274.4	74672	76644.9	77923	79146.4	79999.4	81197.4	81974.6	81563.7	82313.6	82029	82173.4	82039.3	81175.5	80739.2	80349	79180.6	78440.4	77692.3	76863	75733.1	75234.8	74065.1	73502	72111.3	71571.2	70293.2	69654.3	68423
	452	68463.3	70935.8	72729	75141.7	77127	78413.1	79644.1	80502.5	81708.1	82490.1	82076.7	82831.3	82544.9	82690.2	82555.3	81686.1	81246.9	80854.3	79678.5	78933.7	78180.9	77346.4	76209.4	75708	74530.9	73964.2	72564.8	72021.3	70735.3	70092.4	68853.3
	453	68407.2	70877.7	72669.4	75080.1	77063.8	78348.8	79578.9	80436.6	81641.2	82422.5	82009.4	82763.4	82477.3	82622.4	82487.6	81619.1	81180.4	80788	79613.3	78869	78116.8	77283	76146.9	75645.9	74469.9	73903.6	72505.4	71962.3	70677.3	70035	68796.9
	454	68455.6	70927.9	72720.9	75133.3	77118.4	78404.3	79635.2	80493.5	81699	82480.9	82067.5	82822	82535.7	82681	82546.1	81677	81237.9	80845.3	79669.6	78924.9	78172.2	77337.8	76200.9	75699.5	74522.6	73956	72556.8	72013.3	70727.4	70084.6	68845.6
	455	68311.2	70778.3	72567.5	74974.8	76955.7	78239	79467.3	80323.8	81526.7	82307	81894.5	82647.4	82361.6	82506.6	82372	81504.7	81066.6	80674.8	79501.6	78758.4	78007.3	77174.7	76040.2	75539.9	74365.5	73800	72403.7	71861.4	70578.2	69936.8	68700.4
	456	67046.5	69467.9	71224	73586.8	75531	76790.5	77996.1	78836.7	80017.3	80783.2	80378.3	81117.2	80836.8	80979.1	80847	79995.7	79565.7	79181.2	78029.8	77300.3	76563.1	75745.9	74632.4	74141.3	72988.7	72433.7	71063.3	70531	69271.5	68642	67428.5
	457	66979.3	69398.3	71152.6	73513	75455.2	76713.5	77917.9	78757.6	79937.1	80702.2	80297.7	81035.9	80755.7	80897.9	80765.9	79915.5	79485.9	79101.8	77951.5	77222.8	76486.3	75669.9	74557.6	74067	72915.5	72361.1	70992	70460.3	69202.1	68573.2	67360.9
	458	66759.2	69170.2	70918.7	73271.3	75207.2	76461.3	77661.7	78498.8	79674.4	80436.9	80033.8	80769.6	80490.3	80632	80500.4	79652.9	79224.7	78841.8	77695.3	76969	76234.9	75421.2	74312.5	73823.6	72675.8	72123.2	70758.7	70228.7	68974.6	68347.8	67139.5
	459	65863.3	68241.9	69967	72288	74198	75435.2	76619.5	77445.3	78605.1	79357.4	78959.7	79685.6	79410.1	79549.9	79420.1	78583.9	78161.5	77783.7	76652.6	75936.1	75211.9	74409.1	73315.2	72832.8	71700.5	71155.3	69809.1	69286.2	68049	67430.5	66238.5
	460	65499.3	67864.8	69580.4	71888.6	73787.9	75018.4	76196.1	77017.3	78170.7	78918.9	78523.4	79245.3	78971.3	79110.3	78981.2	78149.7	77729.6	77353.9	76229	75516.4	74796.2	73997.9	72910.1	72430.4	71304.3	70762.1	69423.3	68903.3	67672.9	67057.9	65872.4
	[nm]	C01	X25
[nm]		470	471	472	473	474	475	476	477	478	479	480	481	482	483	484	485	486	487	488	489	490	491	492	493	494	495	496	497	498	499	500
	430	743.44	757.22	765.046	777.162	791.599	800.046	800.89	804.3	814.423	821.135	812.045	818.043	816.698	814.984	812.492	810.812	803.855	796.417	791.053	782.761	780.058	773.045	767.061	759.848	753.91	745.731	738.298	732.175	720.806	716.321	710.871
	431	738.192	751.875	759.646	771.677	786.012	794.399	795.237	798.623	808.674	815.339	806.314	812.269	810.933	809.232	806.757	805.089	798.181	790.796	785.469	777.236	774.552	767.589	761.646	754.485	748.589	740.467	733.086	727.007	715.718	711.265	705.853
	432	745.45	759.268	767.115	779.264	793.74	802.21	803.055	806.475	816.625	823.355	814.241	820.255	818.906	817.188	814.689	813.005	806.029	798.571	793.192	784.878	782.168	775.136	769.135	761.903	755.949	747.747	740.294	734.155	722.755	718.258	712.793
	433	750.763	764.679	772.582	784.818	799.397	807.927	808.779	812.223	822.445	829.224	820.045	826.101	824.743	823.013	820.496	818.8	811.773	804.263	798.845	790.472	787.742	780.66	774.617	767.333	761.337	753.077	745.57	739.387	727.906	723.377	717.874
	434	760.994	775.1	783.11	795.513	810.291	818.937	819.801	823.292	833.653	840.524	831.22	837.359	835.982	834.228	831.677	829.958	822.836	815.223	809.732	801.244	798.477	791.299	785.173	777.79	771.712	763.339	755.731	749.463	737.826	733.235	727.656
	435	770.083	784.357	792.463	805.014	819.968	828.718	829.592	833.124	843.61	850.562	841.147	847.36	845.966	844.191	841.61	839.87	832.663	824.959	819.402	810.813	808.014	800.749	794.55	787.079	780.929	772.456	764.756	758.414	746.638	741.992	736.347
	436	775.334	789.705	797.866	810.503	825.559	834.368	835.248	838.805	849.362	856.362	846.882	853.137	851.734	849.947	847.348	845.597	838.34	830.584	824.989	816.341	813.523	806.209	799.968	792.446	786.253	777.723	769.971	763.585	751.729	747.051	741.368
	437	774.976	789.34	797.498	810.129	825.178	833.983	834.863	838.418	848.97	855.967	846.491	852.744	851.341	849.555	846.957	845.206	837.953	830.201	824.609	815.965	813.148	805.837	799.599	792.08	785.89	777.364	769.615	763.233	751.382	746.706	741.025
	438	787.138	801.728	810.014	822.843	838.128	847.072	847.965	851.576	862.294	869.4	859.776	866.127	864.702	862.888	860.249	858.471	851.104	843.23	837.55	828.77	825.909	818.484	812.148	804.511	798.224	789.564	781.694	775.211	763.174	758.425	752.655
	439	804.086	818.99	827.454	840.559	856.174	865.309	866.222	869.911	880.859	888.119	878.288	884.775	883.319	881.466	878.771	876.954	869.429	861.385	855.583	846.614	843.691	836.106	829.633	821.832	815.41	806.563	798.524	791.902	779.605	774.754	768.86
	440	805.559	820.49	828.97	842.099	857.742	866.895	867.809	871.504	882.473	889.746	879.897	886.395	884.938	883.081	880.381	878.561	871.022	862.963	857.15	848.165	845.237	837.638	831.153	823.338	816.904	808.041	799.987	793.352	781.033	776.174	770.269
	441	809.769	824.779	833.303	846.5	862.225	871.426	872.345	876.059	887.085	894.396	884.496	891.028	889.563	887.697	884.982	883.153	875.574	867.473	861.63	852.598	849.655	842.016	835.497	827.641	821.174	812.264	804.168	797.499	785.116	780.231	774.295
	442	809.218	824.218	832.736	845.925	861.639	870.833	871.751	875.464	886.482	893.788	883.894	890.422	888.958	887.093	884.38	882.552	874.979	866.883	861.044	852.018	849.077	841.443	834.929	827.079	820.615	811.712	803.621	796.957	784.582	779.7	773.768
	443	809.647	824.654	833.177	846.373	862.095	871.294	872.213	875.927	886.951	894.261	884.362	890.894	889.429	887.563	884.849	883.02	875.442	867.343	861.5	852.47	849.527	841.889	835.371	827.517	821.05	812.142	804.047	797.379	784.997	780.113	774.178
	444	814.053	829.142	837.711	850.979	866.787	876.036	876.96	880.694	891.778	899.128	889.175	895.742	894.269	892.393	889.664	887.825	880.206	872.063	866.189	857.109	854.15	846.47	839.918	832.02	825.518	816.562	808.422	801.718	789.269	784.358	778.391
	445	814.835	829.939	838.516	851.797	867.62	876.878	877.802	881.541	892.635	899.992	890.029	896.603	895.128	893.251	890.519	888.678	881.052	872.901	867.021	857.933	854.971	847.284	840.725	832.82	826.311	817.346	809.199	802.489	790.028	785.112	779.139
	446	814.399	829.495	838.068	851.341	867.156	876.409	877.333	881.069	892.158	899.51	889.553	896.123	894.65	892.773	890.043	888.203	880.581	872.434	866.557	857.474	854.513	846.831	840.275	832.374	825.869	816.909	808.766	802.059	789.605	784.692	778.722
	447	820.035	835.235	843.867	857.232	873.156	882.473	883.404	887.166	898.331	905.735	895.709	902.324	900.84	898.95	896.201	894.349	886.674	878.471	872.554	863.407	860.426	852.69	846.089	838.134	831.584	822.562	814.363	807.609	795.069	790.122	784.111
	448	821.177	836.399	845.043	858.426	874.373	883.703	884.635	888.402	899.583	906.997	896.957	903.582	902.095	900.203	897.45	895.595	887.91	879.695	873.769	864.61	861.625	853.878	847.268	839.302	832.743	823.708	815.498	808.735	796.177	791.223	785.203
	449	816.294	831.424	840.017	853.321	869.172	878.447	879.373	883.118	894.233	901.602	891.622	898.208	896.73	894.849	892.112	890.269	882.629	874.463	868.573	859.468	856.501	848.8	842.229	834.31	827.79	818.809	810.647	803.925	791.441	786.517	780.533
	450	804.429	819.34	827.808	840.918	856.539	865.679	866.592	870.282	881.235	888.498	878.663	885.153	883.697	881.843	879.146	877.329	869.8	861.753	855.948	846.976	844.052	836.463	829.988	822.184	815.759	806.908	798.865	792.24	779.938	775.085	769.189
	451	787.005	801.593	809.877	822.704	837.986	846.928	847.821	851.432	862.148	869.253	859.631	865.98	864.556	862.742	860.104	858.326	850.96	843.087	837.408	828.63	825.769	818.345	812.01	804.375	798.089	789.43	781.561	775.08	763.045	758.297	752.528
	452	781.474	795.959	804.185	816.922	832.097	840.976	841.863	845.448	856.088	863.144	853.589	859.894	858.48	856.679	854.059	852.293	844.98	837.162	831.523	822.807	819.966	812.594	806.303	798.722	792.48	783.882	776.069	769.633	757.682	752.968	747.239
	453	768.576	782.823	790.913	803.439	818.364	827.097	827.969	831.495	841.96	848.899	839.502	845.702	844.311	842.54	839.963	838.227	831.034	823.345	817.8	809.227	806.433	799.183	792.996	785.54	779.401	770.945	763.26	756.931	745.177	740.541	734.907
	454	755.252	769.252	777.202	789.511	804.177	812.758	813.615	817.08	827.363	834.182	824.948	831.041	829.674	827.934	825.402	823.696	816.627	809.072	803.622	795.198	792.453	785.328	779.249	771.922	765.889	757.58	750.029	743.809	732.259	727.703	722.166
	455	743.788	757.575	765.404	777.526	791.97	800.421	801.265	804.677	814.804	821.519	812.426	818.426	817.08	815.366	812.872	811.192	804.231	796.79	791.424	783.127	780.424	773.407	767.42	760.204	754.263	746.08	738.643	732.518	721.143	716.656	711.204
	456	712.846	726.059	733.563	745.181	759.024	767.123	767.932	771.202	780.908	787.344	778.629	784.379	783.089	781.447	779.057	777.446	770.775	763.644	758.5	750.549	747.958	741.233	735.495	728.579	722.886	715.043	707.916	702.045	691.144	686.843	681.618
	457	702.586	715.609	723.005	734.456	748.099	756.082	756.879	760.102	769.669	776.012	767.422	773.09	771.818	770.199	767.844	766.257	759.681	752.653	747.583	739.747	737.193	730.565	724.909	718.093	712.481	704.751	697.727	691.94	681.196	676.958	671.807
	458	685.975	698.691	705.911	717.092	730.412	738.206	738.985	742.132	751.472	757.665	749.278	754.812	753.571	751.99	749.69	748.141	741.721	734.858	729.908	722.257	719.764	713.292	707.771	701.116	695.637	688.089	681.231	675.581	665.091	660.953	655.924
	459	665.405	677.739	684.743	695.588	708.509	716.069	716.824	719.877	728.937	734.945	726.809	732.177	730.973	729.44	727.209	725.706	719.478	712.822	708.02	700.598	698.18	691.903	686.546	680.091	674.776	667.455	660.802	655.322	645.146	641.132	636.255
	460	654.325	666.454	673.341	684.006	696.712	704.146	704.889	707.89	716.8	722.707	714.707	719.986	718.802	717.294	715.1	713.622	707.498	700.953	696.231	688.933	686.554	680.382	675.115	668.767	663.541	656.342	649.799	644.411	634.404	630.457	625.66
	[nm]	C02	X26
[nm]		470	471	472	473	474	475	476	477	478	479	480	481	482	483	484	485	486	487	488	489	490	491	492	493	494	495	496	497	498	499	500
	430	49909	51777	53170.7	55054	56548.7	57574.2	58573.9	59283.2	60204.2	60804.3	60555.9	61239.4	61017.5	61202.2	61066.8	60542.5	60158.8	59975.4	59188.1	58603	57980.2	57432.6	56582.5	56163.8	55367.5	55001	53812.7	53497.4	52519.2	52002	51113.4
	431	50067.9	51941.9	53340.1	55229.4	56728.8	57757.6	58760.5	59472	60395.9	60997.9	60748.8	61434.5	61211.8	61397.2	61261.3	60735.3	60350.4	60166.4	59376.6	58789.6	58164.8	57615.5	56762.7	56342.6	55543.8	55176.2	53984.1	53667.8	52686.5	52167.6	51276.2
	432	50818.7	52720.8	54139.9	56057.5	57579.4	58623.7	59641.6	60363.8	61301.6	61912.6	61659.7	62355.7	62129.7	62317.8	62180	61646	61255.4	61068.6	60266.9	59671.2	59037	58479.4	57613.8	57187.5	56376.7	56003.6	54793.6	54472.6	53476.5	52949.9	52045.1
	433	51448.2	53373.9	54810.6	56752	58292.7	59349.9	60380.4	61111.6	62061	62679.6	62423.6	63128.1	62899.3	63089.8	62950.2	62409.7	62014.2	61825.1	61013.5	60410.4	59768.4	59203.9	58327.5	57895.9	57075.1	56697.3	55472.3	55147.4	54139	53605.8	52689.8
	434	52215.7	54170.1	55628.2	57598.5	59162.2	60235.2	61281.1	62023.1	62986.7	63614.5	63354.7	64069.8	63837.5	64030.9	63889.2	63340.6	62939.2	62747.3	61923.6	61311.5	60659.9	60087	59197.6	58759.5	57926.5	57543	56299.8	55970	54946.5	54405.4	53475.7
	435	53213.1	55204.8	56690.8	58698.8	60292.4	61385.8	62451.7	63207.9	64189.9	64829.7	64564.9	65293.7	65057	65254	65109.7	64550.6	64141.5	63946	63106.5	62482.7	61818.6	61234.8	60328.4	59882	59033	58642.2	57375.2	57039.1	55996.1	55444.7	54497.3
	436	53685.2	55694.6	57193.7	59219.5	60827.3	61930.4	63005.8	63768.7	64759.4	65404.9	65137.7	65872.9	65634.2	65832.9	65687.3	65123.3	64710.6	64513.3	63666.3	63037	62367.1	61778	60863.6	60413.2	59556.7	59162.5	57884.3	57545.2	56492.9	55936.6	54980.7
	437	54446.1	56483.9	58004.3	60058.8	61689.4	62808.1	63898.7	64672.5	65677.2	66331.8	66060.9	66806.5	66564.4	66766	66618.3	66046.2	65627.7	65427.6	64568.7	63930.4	63251	62653.6	61726.2	61269.4	60400.8	60001	58704.6	58360.7	57293.6	56729.4	55760
	438	55531	57609.5	59160.2	61255.6	62918.7	64059.7	65172	65961.2	66986	67653.7	67377.3	68137.8	67890.8	68096.4	67945.8	67362.4	66935.5	66731.4	65855.3	65204.4	64511.4	63902.1	62956.2	62490.4	61604.4	61196.6	59874.5	59523.7	58435.3	57859.8	56871.1
	439	57016.4	59150.5	60742.6	62894.1	64601.6	65773.2	66915.3	67725.6	68777.7	69463.3	69179.5	69960.4	69706.8	69917.9	69763.2	69164.2	68725.9	68516.4	67616.9	66948.5	66237	65611.4	64640.2	64161.9	63252.2	62833.6	61476	61115.9	59998.3	59407.5	58392.3
	440	57358.1	59504.9	61106.6	63271	64988.7	66167.4	67316.3	68131.4	69189.9	69879.5	69594.1	70379.6	70124.5	70336.9	70181.3	69578.6	69137.7	68926.9	68022	67349.7	66633.9	66004.6	65027.6	64546.4	63631.3	63210.1	61844.4	61482.1	60357.8	59763.5	58742.2
	441	58327.1	60510.2	62139	64339.9	66086.7	67285.2	68453.5	69282.4	70358.8	71060.1	70769.8	71568.6	71309.2	71525.1	71366.9	70754.1	70305.7	70091.4	69171.2	68487.5	67759.6	67119.7	66126.2	65636.8	64706.3	64278	62889.2	62520.8	61377.6	60773.1	59734.6
	442	59242	61459.3	63113.6	65349.1	67123.3	68340.6	69527.3	70369.2	71462.4	72174.7	71879.9	72691.2	72427.7	72647.1	72486.3	71863.9	71408.5	71190.8	70256.2	69561.7	68822.5	68172.5	67163.4	66666.4	65721.2	65286.2	63875.6	63501.4	62340.3	61726.4	60671.6
	443	59726.7	61962.2	63630.1	65883.9	67672.5	68899.8	70096.2	70945	72047.1	72765.3	72468.1	73286	73020.4	73241.5	73079.5	72452	71992.8	71773.3	70831.1	70130.9	69385.6	68730.3	67713	67211.9	66259	65820.4	64398.3	64021.1	62850.4	62231.5	61168.1
	444	60187.1	62439.8	64120.5	66391.7	68194.1	69430.9	70636.4	71491.8	72602.4	73326.1	73026.6	73850.9	73583.2	73806	73642.7	73010.4	72547.7	72326.6	71377	70671.5	69920.4	69260	68234.9	67729.9	66769.7	66327.7	64894.7	64514.5	63334.8	62711.1	61639.5
	445	61211.4	63502.5	65211.8	67521.6	69354.7	70612.5	71838.6	72708.5	73838.1	74574.1	74269.5	75107.7	74835.5	75062.1	74896.1	74253	73782.4	73557.5	72591.8	71874.3	71110.4	70438.8	69396.2	68882.6	67906.1	67456.6	65999.1	65612.5	64412.7	63778.4	62688.6
	446	62051.9	64374.4	66107.2	68448.7	70307	71582.1	72825	73706.8	74851.9	75598	75289.2	76139	75863	76092.8	75924.4	75272.5	74795.5	74567.5	73588.5	72861.1	72086.8	71405.9	70349	69828.4	68838.4	68382.8	66905.3	66513.4	65297.1	64654.1	63549.3
	447	62945.7	65301.7	67059.4	69434.7	71319.7	72613.2	73874	74768.5	75930.1	76687	76373.7	77235.7	76955.8	77188.8	77018.1	76356.8	75872.9	75641.6	74648.5	73910.6	73125.1	72434.5	71362.3	70834.3	69830	69367.8	67869.1	67471.5	66237.7	65585.4	64464.7
	448	63378.5	65750.8	67520.6	69912.1	71810.2	73112.5	74382	75282.7	76452.3	77214.3	76898.9	77766.9	77485	77719.6	77547.7	76881.8	76394.6	76161.7	75161.9	74418.9	73628	72932.6	71853.1	71321.4	70310.2	69844.8	68335.8	67935.4	66693.2	66036.5	64908
	449	64276.1	66681.9	68476.7	70902.2	72827.1	74147.9	75435.3	76348.8	77534.9	78307.8	77987.9	78868.1	78582.3	78820.3	78645.9	77970.6	77476.5	77240.3	76226.3	75472.8	74670.7	73965.4	72870.6	72331.4	71305.9	70833.9	69303.5	68897.5	67637.7	66971.6	65827.2
	450	63768.4	66155.2	67935.9	70342.2	72251.9	73562.3	74839.6	75745.8	76922.6	77689.3	77372	78245.3	77961.6	78197.8	78024.8	77354.8	76864.6	76630.2	75624.2	74876.7	74080.9	73381.3	72295.1	71760.1	70742.7	70274.5	68756.1	68353.4	67103.5	66442.7	65307.3
	451	63600.6	65981.1	67757.1	70157.1	72061.7	73368.6	74642.6	75546.4	76720.1	77484.8	77168.3	78039.3	77756.4	77991.9	77819.4	77151.2	76662.3	76428.5	75425.2	74679.6	73885.9	73188.1	72104.8	71571.2	70556.5	70089.5	68575.2	68173.4	66926.8	66267.8	65135.4
	452	63931.7	66324.6	68109.8	70522.3	72436.9	73750.6	75031.2	75939.7	77119.5	77888.2	77570	78445.6	78161.2	78397.9	78224.5	77552.8	77061.4	76826.4	75817.8	75068.4	74270.6	73569.1	72480.2	71943.8	70923.8	70454.4	68932.2	68528.3	67275.3	66612.8	65474.5
	453	63810.4	66198.8	67980.7	70388.6	72299.5	73610.7	74888.9	75795.7	76973.3	77740.5	77423	78296.8	78013	78249.3	78076.2	77405.8	76915.2	76680.7	75674.1	74926	74129.7	73429.6	72342.7	71807.4	70789.4	70320.8	68801.5	68398.4	67147.7	66486.5	65350.3
	454	63675.5	66058.8	67836.9	70239.7	72146.6	73455.1	74730.5	75635.4	76810.5	77576.1	77259.2	78131.2	77848	78083.8	77911.1	77242.1	76752.6	76518.6	75514	74767.6	73973	73274.3	72189.7	71655.5	70639.7	70172.1	68655.9	68253.7	67005.7	66345.9	65212.1
	455	63572.1	65951.6	67726.8	70125.7	72029.5	73335.8	74609.2	75512.6	76685.7	77450.1	77133.8	78004.4	77721.6	77957	77784.5	77116.6	76627.9	76394.3	75391.4	74646.2	73852.9	73155.4	72072.5	71539.2	70524.9	70058.1	68544.5	68142.9	66896.9	66238.1	65106.2
	456	62306	64638	66377.9	68729	70594.9	71875.2	73123.2	74008.6	75158.4	75907.6	75597.5	76450.8	76173.7	76404.4	76235.3	75580.7	75101.8	74872.8	73889.9	73159.5	72382	71698.3	70637.1	70114.4	69120.3	68662.8	67179.3	66785.7	65564.5	64918.9	63809.5
	457	62215.9	64544.6	66281.9	68629.6	70492.8	71771.3	73017.5	73901.7	75049.8	75797.8	75488.2	76340.3	76063.6	76293.9	76125.1	75471.5	74993.2	74764.6	73783	73053.7	72277.3	71594.7	70535	70013	69020.4	68563.5	67082.2	66689.2	65469.8	64825	63717.3
	458	61931	64249	65978.4	68315.4	70170	71442.6	72683.1	73563.2	74706.1	75450.7	75142.5	75990.7	75715.2	75944.5	75776.5	75125.9	74649.8	74422.2	73445.2	72719.2	71946.3	71266.8	70212	69692.4	68704.3	68249.6	66775	66383.8	65169.9	64528.2	63425.5
	459	61145.4	63434	65141.4	67448.8	69279.9	70536.4	71761.1	72630.1	73758.4	74493.6	74189.3	75026.7	74754.8	74981.2	74815.3	74172.9	73702.8	73478.1	72513.5	71796.7	71033.7	70362.8	69321.3	68808.3	67832.8	67383.8	65927.9	65541.7	64343.2	63709.6	62620.9
	460	60774.3	63049.1	64746.1	67039.5	68859.5	70108.3	71325.7	72189.3	73310.8	74041.6	73739.1	74571.4	74301.1	74526.2	74361.3	73722.8	73255.6	73032.2	72073.5	71361	70602.6	69935.8	68900.6	68390.8	67421.2	66974.9	65527.9	65144	63952.8	63323	62240.9
	[nm]	C03	X27
[nm]		470	471	472	473	474	475	476	477	478	479	480	481	482	483	484	485	486	487	488	489	490	491	492	493	494	495	496	497	498	499	500
	430	52791.5	54712	56210.8	58048.5	59702.9	60762	61760.7	62500.6	63508	64177.2	63948.4	64617.3	64479.9	64601.2	64524.6	64015.5	63557.6	63358.4	62475.7	61986	61355.8	60732.8	59905.6	59454.1	58691.1	58239	57032.3	56705.4	55705.6	55182.5	54190.5
	431	53272.8	55210.9	56723.3	58577.8	60247.2	61316.1	62323.8	63070.5	64087.1	64762.4	64531.4	65206.5	65067.8	65190.2	65112.9	64599.2	64137.1	63936.1	63045.3	62551.2	61915.2	61286.6	60451.8	59996.2	59226.3	58770	57552.3	57222.4	56213.5	55685.6	54684.6
	432	53917.8	55879.3	57410.1	59287	60976.6	62058.4	63078.4	63834	64863	65546.4	65312.7	65995.9	65855.6	65979.5	65901.2	65381.2	64913.6	64710.1	63808.6	63308.5	62664.8	62028.5	61183.7	60722.6	59943.3	59481.5	58249.1	57915.2	56894.1	56359.8	55346.6
	433	54551.5	56536.1	58084.8	59983.7	61693.3	62787.7	63819.7	64584.3	65625.3	66316.8	66080.3	66771.6	66629.6	66754.9	66675.7	66149.7	65676.5	65470.6	64558.5	64052.5	63401.3	62757.6	61902.7	61436.2	60647.8	60180.6	58933.7	58595.8	57562.7	57022.2	55997.1
	434	55469.3	57487.3	59062.1	60993	62731.3	63844.2	64893.5	65670.9	66729.5	67432.6	67192.1	67895	67750.7	67878.1	67797.6	67262.7	66781.5	66572.2	65644.7	65130.2	64468.1	63813.5	62944.3	62469.9	61668.2	61193.1	59925.3	59581.7	58531.3	57981.6	56939.3
	435	56417.5	58470	60071.7	62035.6	63803.6	64935.5	66002.8	66793.5	67870.1	68585.2	68340.7	69055.6	68908.8	69038.4	68956.5	68412.4	67923	67710.2	66766.8	66243.5	65570	64904.3	64020.2	63537.7	62722.4	62239.1	60949.6	60600.2	59531.8	58972.7	57912.6
	436	56896.3	58966.2	60581.5	62562.1	64345.1	65486.6	66562.9	67360.4	68446.2	69167.3	68920.7	69641.7	69493.6	69624.3	69541.7	68993	68499.5	68284.8	67333.5	66805.8	66126.6	65455.1	64563.6	64077	63254.7	62767.4	61466.9	61114.5	60037	59473.2	58404.1
	437	57662.2	59759.9	61397	63404.2	65211.2	66368.1	67458.9	68267.1	69367.4	70098.3	69848.4	70579.1	70429	70561.5	70477.8	69921.7	69421.5	69204	68239.8	67705	67016.6	66336.2	65432.6	64939.5	64106.1	63612.2	62294.2	61937.1	60845.1	60273.7	59190.2
	438	58845.6	60986.4	62657	64705.5	66549.6	67730.2	68843.4	69668.1	70791.1	71537	71281.9	72027.6	71874.5	72009.7	71924.2	71356.7	70846.3	70624.3	69640.4	69094.5	68392.1	67697.6	66775.5	66272.3	65421.8	64917.8	63572.7	63208.3	62093.9	61510.8	60405
	439	60351.8	62547.4	64260.8	66361.6	68252.9	69463.8	70605.4	71451.3	72603	73368	73106.4	73871.2	73714.1	73852.8	73765.2	73183.1	72659.6	72431.9	71422.8	70863	70142.6	69430.4	68484.7	67968.5	67096.3	66579.4	65199.9	64826.2	63683.2	63085.1	61951.1
	440	60717.6	62926.5	64650.3	66763.9	68666.6	69884.8	71033.4	71884.4	73043.1	73812.7	73549.5	74318.9	74160.9	74300.4	74212.3	73626.7	73100	72870.9	71855.7	71292.5	70567.7	69851.2	68899.8	68380.5	67503	66982.9	65595.1	65219.1	64069.2	63467.5	62326.6
	441	61812.2	64060.9	65815.7	67967.4	69904.5	71144.6	72313.9	73180.3	74359.9	75143.4	74875.4	75658.7	75497.8	75639.8	75550.1	74954	74417.8	74184.6	73151.1	72577.7	71839.9	71110.4	70141.8	69613.2	68719.9	68190.4	66777.6	66394.8	65224.2	64611.7	63450.2
	442	62718.3	65000	66780.6	68963.8	70929.3	72187.6	73374.1	74253.1	75450	76244.9	75973.1	76767.8	76604.6	76748.7	76657.7	76052.8	75508.8	75272.1	74223.5	73641.7	72893	72152.9	71170.1	70633.7	69727.3	69190.1	67756.5	67368.1	66180.4	65558.9	64380.4
	443	63204.1	65503.4	67297.8	69498	71478.6	72746.7	73942.3	74828.2	76034.3	76835.5	76561.5	77362.4	77197.9	77343.1	77251.4	76641.9	76093.6	75855.1	74798.3	74212.1	73457.6	72711.7	71721.3	71180.8	70267.3	69726	68281.3	67889.9	66693	66066.6	64879
	444	63662.8	65978.8	67786.3	70002.4	71997.4	73274.7	74479	75371.3	76586.2	77393.2	77117.2	77923.9	77758.2	77904.5	77812.1	77198.1	76645.9	76405.7	75341.2	74750.7	73990.7	73239.5	72241.9	71697.4	70777.3	70232.1	68776.9	68382.7	67177	66546.1	65349.9
	445	64814.5	67172.5	69012.6	71268.8	73299.9	74600.3	75826.4	76734.8	77971.7	78793.3	78512.3	79333.6	79164.9	79313.9	79219.8	78594.7	78032.5	77787.9	76704.2	76103	75329.3	74564.4	73548.8	72994.5	72057.8	71502.6	70021.1	69619.8	68392.3	67750	66532.1
	446	65627.3	68014.8	69878	72162.5	74219.1	75535.8	76777.3	77697.1	78949.5	79781.3	79496.9	80328.4	80157.7	80308.4	80213.2	79580.3	79011	78763.4	77666.1	77057.3	76273.9	75499.5	74471.1	73909.9	72961.4	72399.3	70899.2	70492.8	69249.9	68599.6	67366.4
	447	66526.1	68946.3	70834.9	73150.7	75235.5	76570.3	77828.7	78761.1	80030.7	80873.9	80585.6	81428.5	81255.4	81408.3	81311.7	80670.1	80093.1	79842.1	78729.7	78112.6	77318.5	76533.4	75491	74922	73960.6	73390.8	71870.2	71458.2	70198.3	69539.1	68289
	448	66992.8	69430	71331.9	73664	75763.4	77107.5	78374.8	79313.7	80592.2	81441.3	81151	81999.8	81825.5	81979.4	81882.2	81236.1	80655	80402.2	79282.1	78660.7	77861	77070.4	76020.6	75447.7	74479.5	73905.7	72374.4	71959.5	70690.8	70027	68768.1
	449	67972.2	70445	72374.7	74740.9	76870.9	78234.7	79520.5	80473.2	81770.3	82631.9	82337.3	83198.6	83021.7	83177.9	83079.2	82423.7	81834.1	81577.6	80441.1	79810.6	78999.2	78197.1	77132	76550.7	75568.3	74986.1	73432.4	73011.5	71724.2	71050.7	69773.4
	450	67435.2	69888.4	71802.9	74150.4	76263.6	77616.6	78892.3	79837.4	81124.3	81979.1	81686.8	82541.3	82365.8	82520.7	82422.8	81772.5	81187.6	80933.1	79805.6	79180.1	78375.1	77579.3	76522.6	75945.9	74971.3	74393.7	72852.3	72434.7	71157.6	70489.3	69222.2
	451	67216	69661.3	71569.6	73909.4	76015.8	77364.4	78635.9	79578	80860.7	81712.7	81421.3	82273.1	82098.1	82252.6	82155	81506.8	80923.8	80670.1	79546.2	78922.8	78120.4	77327.2	76273.9	75699.1	74727.6	74151.9	72615.5	72199.3	70926.4	70260.3	68997.2
	452	67641.4	70102.1	72022.5	74377.1	76496.9	77854	79133.5	80081.6	81372.4	82229.8	81936.6	82793.7	82617.7	82773.1	82674.9	82022.6	81435.9	81180.6	80049.6	79422.2	78614.7	77816.5	76756.6	76178.1	75200.5	74621.2	73075.1	72656.2	71375.2	70704.9	69433.9
	453	67365	69815.7	71728.2	74073.2	76184.2	77535.8	78810.1	79754.3	81039.9	81893.7	81601.8	82455.4	82280	82434.8	82337	81687.4	81103.1	80848.9	79722.5	79097.6	78293.5	77498.5	76442.9	75866.8	74893.2	74316.2	72776.4	72359.3	71083.5	70415.9	69150.1
	454	67314.9	69763.8	71674.9	74018.2	76127.7	77478.2	78751.6	79695.1	80979.7	81832.9	81541.2	82394.1	82219	82373.6	82275.9	81626.7	81042.8	80788.8	79663.3	79038.9	78235.3	77441	76386.2	75810.5	74837.6	74261.1	72722.4	72305.5	71030.7	70363.7	69098.8
	455	67066.9	69506.8	71410.8	73745.5	75847.2	77192.8	78461.5	79401.5	80681.3	81531.4	81240.7	82090.5	81916	82070.1	81972.7	81326	80744.2	80491.2	79369.8	78747.7	77947.1	77155.6	76104.7	75531.2	74561.9	73987.4	72454.5	72039.1	70769	70104.4	68844.2
	456	65704.8	68095.1	69960.5	72247.7	74306.7	75625	76867.9	77788.8	79042.7	79875.5	79590.7	80423.3	80252.3	80403.2	80307.9	79674.2	79104.3	78856.4	77757.8	77148.3	76364	75588.6	74559	73997.1	73047.5	72484.7	70982.9	70576	69331.7	68680.6	67445.9
	457	65520.4	67904	69764.2	72045	74098.2	75412.8	76652.2	77570.5	78820.9	79651.4	79367.4	80197.6	80027.1	80177.6	80082.5	79450.7	78882.3	78635.1	77539.6	76931.8	76149.7	75376.5	74349.8	73789.5	72842.5	72281.3	70783.7	70378	69137.2	68487.9	67256.7
	458	65284.4	67659.4	69512.8	71785.4	73831.3	75141.1	76376.1	77291.1	78536.9	79364.4	79081.4	79908.7	79738.8	79888.8	79794	79164.4	78598.2	78351.8	77260.2	76654.7	75875.3	75104.9	74082	73523.6	72580.1	72020.9	70528.7	70124.4	68888.1	68241.1	67014.4
	459	64262.2	66600	68424.4	70661.4	72675.3	73964.6	75180.2	76080.9	77307.2	78121.8	77843.2	78657.5	78490.3	78637.9	78544.7	77924.9	77367.5	77125	76050.5	75454.5	74687.3	73929	72922	72372.5	71443.7	70893.3	69424.4	69026.5	67809.5	67172.7	65965.1
	460	63908.2	66233.2	68047.6	70272.2	72275	73557.2	74766.1	75661.9	76881.4	77691.5	77414.5	78224.3	78058	78204.8	78112.1	77495.7	76941.4	76700.2	75631.7	75038.9	74276	73521.8	72520.4	71973.8	71050.2	70502.8	69042	68646.3	67436	66802.7	65601.8
	[nm]	C04	X28
[nm]		470	471	472	473	474	475	476	477	478	479	480	481	482	483	484	485	486	487	488	489	490	491	492	493	494	495	496	497	498	499	500
	430	46770.4	48528.6	49691.6	51410.1	52774.9	53655.1	54521.3	55133.2	55940.7	56525	56237.2	56814.2	56549.8	56705.8	56624.4	56097.5	55786.1	55498.2	54677.1	54207	53690.8	53179.6	52432.3	52017.7	51235.6	50851.9	49881.4	49539.2	48634.9	48226.4	47370.3
	431	47097	48867.4	50038.6	51769.1	53143.5	54029.8	54902	55518.2	56331.3	56919.7	56629.9	57210.9	56944.7	57101.8	57019.8	56489.2	56175.7	55885.7	55058.9	54585.6	54065.7	53550.9	52798.4	52381	51593.4	51207	50229.7	49885.2	48974.5	48563.1	47701.1
	432	47764.8	49560.4	50748.1	52503.1	53897	54795.9	55680.5	56305.4	57130.1	57726.8	57432.9	58022.2	57752.1	57911.4	57828.4	57290.2	56972.2	56678.2	55839.6	55359.6	54832.3	54310.3	53547.1	53123.7	52325	51933.1	50942	50592.5	49669	49251.7	48377.5
	433	48397.1	50216.4	51419.9	53198.1	54610.4	55521.2	56417.5	57050.7	57886.3	58490.9	58193.1	58790.2	58516.5	58678	58593.8	58048.5	57726.4	57428.4	56578.8	56092.3	55558.1	55029.1	54255.8	53826.9	53017.6	52620.5	51616.3	51262.2	50326.4	49903.7	49017.8
	434	49254.6	51106.2	52331	54140.7	55578.1	56505	57417.2	58061.6	58912	59527.4	59224.3	59831.9	59553.4	59717.7	59632.1	59077.1	58749.2	58446	57581.3	57086.3	56542.6	56004.2	55217.2	54780.7	53957	53552.9	52530.9	52170.5	51218.2	50787.9	49886.4
	435	50148.6	52033.7	53280.8	55123.3	56586.8	57530.5	58459.2	59115.3	59981.2	60607.7	60299.1	60917.8	60634.3	60801.5	60714.3	60149.3	59815.5	59506.7	58626.4	58122.3	57568.8	57020.6	56219.4	55774.9	54936.3	54524.8	53484.3	53117.4	52147.7	51709.7	50791.8
	436	50573.8	52474.9	53732.5	55590.7	57066.6	58018.4	58954.9	59616.6	60489.8	61121.6	60810.4	61434.3	61148.4	61317.1	61229.1	60659.4	60322.7	60011.3	59123.5	58615.2	58056.9	57504.1	56696.1	56247.8	55402.1	54987.1	53937.8	53567.8	52589.9	52148.1	51222.5
	437	51376.3	53307.6	54585.2	56472.9	57972.2	58939	59890.4	60562.6	61449.7	62091.5	61775.4	62409.2	62118.7	62290.1	62200.7	61621.9	61279.9	60963.6	60061.7	59545.3	58978.2	58416.6	57595.7	57140.4	56281.3	55859.7	54793.7	54417.8	53424.4	52975.7	52035.3
	438	52469.6	54442	55746.8	57674.6	59205.8	60193.2	61164.9	61851.4	62757.3	63412.9	63090	63737.3	63440.6	63615.6	63524.4	62933.2	62583.9	62260.9	61339.8	60812.4	60233.2	59659.7	58821.4	58356.3	57478.9	57048.4	55959.7	55575.8	54561.3	54103	53142.6
	439	53900.7	55926.8	57267.2	59247.6	60820.6	61834.9	62833.1	63538.3	64469	65142.4	64810.7	65475.6	65170.9	65350.7	65256.9	64649.7	64290.8	63959	63012.8	62471	61876	61286.9	60425.7	59947.9	59046.6	58604.3	57485.9	57091.6	56049.4	55578.6	54592
	440	54321.8	56363.9	57714.7	59710.6	61295.9	62318.1	63324.1	64034.8	64972.7	65651.4	65317.1	65987.3	65680.1	65861.4	65766.9	65154.9	64793.2	64458.8	63505.1	62959.2	62359.5	61765.8	60897.9	60416.4	59508	59062.3	57935.1	57537.7	56487.4	56012.9	55018.6
	441	55293.3	57371.8	58746.8	60778.4	62392	63432.6	64456.6	65180	66134.7	66825.5	66485.2	67167.3	66854.7	67039.2	66943	66320.1	65952	65611.5	64640.8	64085.1	63474.7	62870.4	61986.9	61496.8	60572.2	60118.5	58971.2	58566.7	57497.6	57014.6	56002.5
	442	56147	58257.6	59653.9	61716.8	63355.3	64412	65451.7	66186.3	67155.7	67857.2	67511.7	68204.4	67886.9	68074.2	67976.6	67344	66970.2	66624.5	65638.8	65074.5	64454.7	63841.1	62944	62446.3	61507.4	61046.7	59881.7	59470.9	58385.3	57894.9	56867.2
	443	56635.7	58764.7	60173.1	62254	63906.8	64972.6	66021.4	66762.4	67740.3	68447.9	68099.3	68798	68477.8	68666.8	68568.2	67930.2	67553.1	67204.5	66210.2	65641	65015.8	64396.8	63491.8	62989.9	62042.8	61578.1	60402.9	59988.6	58893.5	58398.8	57362.2
	444	57102.4	59249	60668.9	62767	64433.4	65508	66565.5	67312.6	68298.5	69011.9	68660.5	69365	69042.1	69232.6	69133.3	68489.9	68109.8	67758.2	66755.8	66181.9	65551.5	64927.4	64015	63508.9	62554	62085.5	60900.7	60482.9	59378.8	58880	57834.9
	445	58091.5	60275.2	61719.8	63854.2	65549.5	66642.7	67718.5	68478.5	69481.5	70207.3	69849.8	70566.5	70238	70431.8	70330.8	69676.3	69289.6	68931.9	67912.1	67328.2	66687	66052	65123.9	64609	63637.6	63160.9	61955.6	61530.5	60407.3	59899.9	58836.6
	446	58884.9	61098.5	62562.8	64726.3	66444.7	67552.9	68643.4	69413.8	70430.5	71166.2	70803.8	71530.2	71197.3	71393.7	71291.3	70627.9	70235.9	69873.4	68839.6	68247.8	67597.8	66954.2	66013.3	65491.4	64506.7	64023.6	62801.7	62370.9	61232.4	60718	59640.2
	447	59806.6	62054.8	63542.1	65739.5	67484.8	68610.3	69717.8	70500.3	71532.9	72280.1	71912.1	72649.9	72311.8	72511.3	72407.2	71733.4	71335.3	70967.1	69917.2	69316.1	68655.9	68002.2	67046.6	66516.5	65516.4	65025.7	63784.7	63347.2	62190.8	61668.4	60573.8
	448	60239	62503.5	64001.5	66214.8	67972.7	69106.3	70221.9	71010	72050.1	72802.7	72432	73175.2	72834.6	73035.5	72930.7	72252.1	71851	71480.2	70422.7	69817.2	69152.3	68493.9	67531.4	66997.4	65990.1	65495.8	64245.9	63805.2	62640.5	62114.3	61011.7
	449	61170.6	63470	64991.2	67238.7	69023.8	70175	71307.8	72108.1	73164.3	73928.5	73552.1	74306.7	73960.9	74164.9	74058.5	73369.4	72962.1	72585.5	71511.7	70896.8	70221.6	69553	68575.6	68033.5	67010.6	66508.7	65239.4	64791.9	63609.1	63074.8	61955.2
	450	60707.2	62989.3	64498.9	66729.4	68501	69643.4	70767.7	71561.9	72610.1	73368.5	72994.9	73743.9	73400.6	73603.1	73497.6	72813.6	72409.5	72035.7	70970	70359.8	69689.7	69026.2	68056.2	67518.1	66503	66004.9	64745.2	64301.1	63127.3	62597	61485.9
	451	60558.3	62834.7	64340.7	66565.7	68332.9	69472.6	70594.1	71386.4	72431.9	73188.5	72815.9	73563	73220.6	73422.6	73317.2	72635	72231.8	71859	70795.9	70187.2	69518.7	68856.8	67889.2	67352.5	66339.9	65843	64586.4	64143.3	62972.4	62443.5	61335.1
	452	60963.3	63255	64771	67010.9	68790	69937.3	71066.2	71863.8	72916.4	73678.1	73302.9	74055	73710.3	73913.7	73807.6	73120.8	72715	72339.6	71269.4	70656.7	69983.7	69317.4	68343.3	67803	66783.6	66283.3	65018.4	64572.4	63393.6	62861.1	61745.3
	453	60803.3	63089	64601	66835	68609.4	69753.7	70879.7	71675.2	72725	73484.7	73110.5	73860.6	73516.8	73719.7	73613.9	72928.9	72524.1	72149.8	71082.3	70471.2	69800	69135.5	68163.9	67625	66608.3	66109.4	64847.7	64402.9	63227.2	62696.1	61583.2
	454	60822.2	63108.6	64621	66855.8	68630.7	69775.3	70901.7	71697.4	72747.6	73507.5	73133.2	73883.5	73539.7	73742.5	73636.7	72951.5	72546.6	72172.1	71104.4	70493.1	69821.7	69156.9	68185.1	67646	66628.9	66129.9	64867.8	64422.9	63246.8	62715.6	61602.3
	455	60645.5	62925.3	64433.4	66661.6	68431.4	69572.7	70695.8	71489.2	72536.3	73294	72920.8	73668.9	73326.1	73528.4	73422.9	72739.6	72335.9	71962.5	70897.9	70288.3	69618.9	68956.1	67987.1	67449.6	66435.4	65937.8	64679.5	64235.8	63063.2	62533.4	61423.4
	456	59420	61653.7	63131.3	65314.5	67048.5	68166.7	69267.1	70044.5	71070.5	71812.8	71447.2	72180.2	71844.3	72042.5	71939.1	71269.7	70874.1	70508.3	69465.2	68867.9	68212	67562.6	66613.2	66086.5	65092.9	64605.3	63372.4	62937.7	61788.8	61269.7	60182.2
	457	59347.6	61578.5	63054.3	65234.9	66966.8	68083.7	69182.7	69959.2	70983.9	71725.3	71360.1	72092.3	71756.7	71954.7	71851.5	71182.8	70787.8	70422.4	69380.5	68784	68128.9	67480.2	66532	66006	65013.6	64526.6	63295.2	62861	61713.5	61195.1	60108.8
	458	59140.6	61363.8	62834.4	65007.4	66733.3	67846.2	68941.4	69715.2	70736.3	71475.2	71111.2	71840.8	71506.5	71703.7	71600.9	70934.6	70540.9	70176.8	69138.5	68544.1	67891.3	67244.9	66299.9	65775.8	64786.8	64301.6	63074.4	62641.7	61498.2	60981.6	59899.2
	459	58317.5	60509.7	61959.9	64102.6	65804.4	66901.9	67981.9	68744.9	69751.8	70480.4	70121.5	70840.9	70511.2	70705.7	70604.3	69947.3	69559.1	69200	68176.2	67590.1	66946.4	66309	65377.2	64860.3	63885.1	63406.6	62196.5	61769.9	60642.3	60132.9	59065.5
	460	58037.2	60218.9	61662.1	63794.5	65488.2	66580.4	67655.2	68414.5	69416.5	70141.6	69784.5	70500.5	70172.3	70365.9	70265	69611.1	69224.8	68867.4	67848.6	67265.3	66624.6	65990.3	65063	64548.6	63578.1	63101.8	61897.6	61473	60350.8	59843.9	58781.6
	[nm]	C05	X29
[nm]		470	471	472	473	474	475	476	477	478	479	480	481	482	483	484	485	486	487	488	489	490	491	492	493	494	495	496	497	498	499	500
	430	37937.3	39310.5	40206.5	41534.5	42543.6	43212.1	43887.9	44337.9	45018.6	45418.6	45161	45589.4	45427.6	45552.4	45486.1	45025.6	44724.3	44583.2	43946.5	43553.7	43142.3	42704	42102.8	41795.1	41251.4	40949.2	40118.3	39837.2	39153.4	38853.7	38130.3
	431	38132.2	39512.4	40413.1	41747.9	42762.2	43434.1	44113.4	44565.8	45249.9	45652	45393.1	45823.7	45661	45786.5	45719.8	45257	44954.1	44812.3	44172.3	43777.5	43364	42923.5	42319.1	42009.8	41463.3	41159.7	40324.4	40041.9	39354.6	39053.3	38326.2
	432	38588	39984.7	40896.2	42246.9	43273.3	43953.2	44640.7	45098.4	45790.8	46197.6	45935.6	46371.4	46206.7	46333.7	46266.3	45797.9	45491.4	45347.9	44700.3	44300.7	43882.3	43436.5	42824.9	42511.9	41958.9	41651.6	40806.4	40520.5	39824.9	39520.1	38784.3
	433	39087.1	40501.9	41425.2	42793.4	43833	44521.8	45218.1	45681.8	46383.1	46795.2	46529.8	46971.2	46804.5	46933.1	46864.8	46390.3	46079.9	45934.5	45278.5	44873.8	44449.9	43998.4	43378.9	43061.8	42501.7	42190.4	41334.2	41044.7	40340.1	40031.3	39286
	434	39831.2	41273	42213.8	43608	44667.5	45369.4	46078.9	46551.4	47266.1	47686	47415.6	47865.4	47695.5	47826.5	47756.9	47273.5	46957.1	46808.9	46140.5	45728	45296.1	44836	44204.7	43881.6	43310.8	42993.6	42121.1	41826	41108	40793.4	40033.9
	435	40598.5	42068.1	43027	44448.1	45527.9	46243.4	46966.6	47448.2	48176.6	48604.7	48329	48787.5	48614.3	48747.8	48676.9	48184.1	47861.7	47710.7	47029.3	46608.9	46168.7	45699.7	45056.3	44726.9	44145.1	43821.8	42932.5	42631.7	41900	41579.2	40805.1
	436	40923.2	42404.4	43371	44803.5	45892	46613.1	47342.2	47827.6	48561.9	48993.3	48715.5	49177.6	49003	49137.6	49066.1	48569.4	48244.4	48092.2	47405.4	46981.6	46537.9	46065.1	45416.6	45084.6	44498.1	44172.2	43275.8	42972.6	42235	41911.7	41131.4
	437	41613.5	43119.7	44102.6	45559.3	46666.1	47399.4	48140.8	48634.4	49381	49819.8	49537.2	50007.1	49829.6	49966.5	49893.8	49388.7	49058.2	48903.4	48205	47774.2	47322.9	46842.2	46182.7	45845.1	45248.7	44917.3	44005.8	43697.5	42947.4	42618.7	41825.2
	438	42459.5	43996.4	44999.3	46485.5	47614.9	48363.1	49119.5	49623.2	50385	50832.6	50544.4	51023.8	50842.7	50982.4	50908.2	50392.8	50055.6	49897.7	49185.1	48745.4	48285	47794.5	47121.6	46777.2	46168.6	45830.5	44900.5	44585.9	43820.6	43485.1	42675.5
	439	43617.7	45196.5	46226.7	47753.5	48913.7	49682.3	50459.3	50976.7	51759.3	52219.2	51923	52415.6	52229.5	52373	52296.8	51767.4	51420.9	51258.7	50526.7	50075.1	49602	49098.2	48406.9	48053.1	47428	47080.6	46125.2	45802.1	45015.9	44671.3	43839.6
	440	43927.6	45517.6	46555.2	48092.8	49261.2	50035.3	50817.9	51339	52127.1	52590.3	52292	52788.1	52600.6	52745.2	52668.4	52135.2	51786.3	51622.9	50885.7	50430.9	49954.5	49447.1	48750.9	48394.6	47765	47415.2	46453	46127.6	45335.8	44988.7	44151.1
	441	44804.6	46426.3	47484.6	49052.9	50244.6	51034.2	51832.4	52363.8	53167.7	53640.1	53335.9	53841.9	53650.7	53798.1	53719.8	53176	52820.1	52653.5	51901.6	51437.6	50951.8	50434.2	49724.1	49360.6	48718.5	48361.7	47380.3	47048.4	46240.8	45886.8	45032.5
	442	45499.3	47146.2	48220.9	49813.6	51023.7	51825.5	52636.1	53175.8	53992.2	54471.9	54163	54676.7	54482.6	54632.3	54552.8	54000.6	53639.2	53470	52706.4	52235.2	51741.8	51216.2	50495.1	50126.1	49474	49111.7	48115	47777.9	46957.8	46598.4	45730.8
	443	45934	47596.6	48681.6	50289.5	51511.2	52320.7	53139	53683.9	54508	54992.3	54680.4	55199.1	55003.2	55154.3	55074	54516.5	54151.7	53980.8	53209.9	52734.3	52236.2	51705.5	50977.6	50605	49946.6	49580.9	48574.7	48234.4	47406.5	47043.6	46167.7
	444	46400.7	48080.2	49176.2	50800.4	52034.6	52852.3	53678.9	54229.3	55061.8	55551	55236	55760	55562	55714.7	55633.6	55070.4	54701.8	54529.3	53750.5	53270.1	52766.9	52230.9	51495.5	51119.1	50454.1	50084.6	49068.2	48724.5	47888.1	47521.5	46636.8
	445	47217.8	48926.9	50042.2	51695	52950.9	53783	54624.1	55184.2	56031.4	56529.3	56208.7	56741.9	56540.4	56695.8	56613.3	56040.2	55665.1	55489.5	54697	54208.1	53696.1	53150.6	52402.3	52019.3	51342.6	50966.6	49932.3	49582.5	48731.4	48358.3	47458
	446	47863.9	49596.4	50726.9	52402.4	53675.5	54518.9	55371.6	55939.4	56798.1	57302.8	56977.8	57518.3	57314.1	57471.6	57388	56807	56426.8	56248.8	55445.5	54949.9	54430.9	53877.9	53119.4	52731.1	52045.1	51664	50615.6	50261	49398.2	49020.1	48107.4
	447	48699.1	50461.8	51612.1	53316.7	54612	55470.2	56337.8	56915.5	57789.2	58302.7	57972	58521.9	58314.2	58474.4	58389.3	57798.2	57411.4	57230.3	56413	55908.7	55380.6	54818.1	54046.3	53651.2	52953.3	52565.5	51498.8	51138	50260.2	49875.4	48946.8
	448	49076.5	50852.9	52012	53729.9	55035.3	55900.1	56774.4	57356.5	58237	58754.5	58421.3	58975.5	58766.1	58927.5	58841.8	58246.1	57856.3	57673.8	56850.1	56342	55809.8	55242.9	54465.1	54067	53363.6	52972.8	51897.8	51534.3	50649.7	50261.9	49326.1
	449	49885.5	51691.1	52869.4	54615.6	55942.5	56821.6	57710.3	58302	59197.1	59723	59384.3	59947.6	59734.8	59898.9	59811.8	59206.3	58810.1	58624.5	57787.3	57270.8	56729.8	56153.5	55362.9	54958.2	54243.3	53846.1	52753.3	52383.8	51484.6	51090.5	50139.3
	450	49557	51350.7	52521.3	54256	55574.1	56447.4	57330.2	57918.1	58807.2	59329.7	58993.2	59552.9	59341.4	59504.5	59417.9	58816.4	58422.8	58238.4	57406.8	56893.6	56356.2	55783.7	54998.3	54596.3	53886.1	53491.5	52406	52038.8	51145.6	50754	49809.1
	451	49455.7	51245.8	52413.9	54145	55460.5	56332	57213	57799.7	58687	59208.4	58872.6	59431.1	59220.1	59382.8	59296.4	58696.2	58303.3	58119.4	57289.4	56777.3	56241	55669.7	54885.9	54484.7	53775.9	53382.1	52298.8	51932.4	51041	50650.3	49707.3
	452	49785.1	51587.2	52763.1	54505.8	55830	56707.3	57594.2	58184.7	59078	59602.9	59264.9	59827.1	59614.7	59778.5	59691.5	59087.2	58691.8	58506.6	57671.1	57155.6	56615.7	56040.6	55251.6	54847.7	54134.2	53737.8	52647.2	52278.4	51381	50987.7	50038.4
	453	49732	51532.1	52706.8	54447.6	55770.4	56646.8	57532.7	58122.7	59015	59539.3	59201.7	59763.2	59551.1	59714.7	59627.8	59024.2	58629.2	58444.2	57609.6	57094.6	56555.3	55980.8	55192.6	54789.2	54076.5	53680.4	52591.1	52222.7	51326.2	50933.3	49985.1
	454	49724	51523.8	52698.3	54438.8	55761.4	56637.6	57523.4	58113.3	59005.4	59529.7	59192.1	59753.6	59541.5	59705.1	59618.2	59014.6	58619.7	58434.7	57600.2	57085.4	56546.2	55971.7	55183.7	54780.4	54067.7	53671.8	52582.6	52214.2	51317.9	50925.1	49977
	455	49576.5	51371	52542	54277.4	55596	56469.6	57352.8	57940.9	58830.4	59353.1	59016.5	59576.4	59364.9	59528	59441.3	58839.6	58445.8	58261.4	57429.4	56916.1	56378.4	55805.7	55020	54617.9	53907.4	53512.6	52426.6	52059.4	51165.7	50774.1	49828.7
	456	48602	50361.2	51509.2	53210.4	54503.2	55359.6	56225.5	56802	57674	58186.4	57856.4	58405.3	58197.9	58357.8	58272.9	57683	57297	57116.2	56300.5	55797.3	55270.2	54708.8	53938.5	53544.3	52847.7	52460.7	51396.1	51036	50160	49776	48849.3
	457	48489.1	50244.3	51389.6	53086.9	54376.6	55231.1	56094.9	56670.1	57540.1	58051.3	57722.1	58269.6	58062.8	58222.3	58137.6	57549.1	57163.9	56983.6	56169.8	55667.7	55141.9	54581.7	53813.3	53419.9	52725	52338.9	51276.7	50917.5	50043.5	49660.4	48735.8
	458	48280.2	50027.7	51168.1	52858.1	54142.3	54993.1	55853.2	56425.9	57292.1	57801.2	57473.3	58018.5	57812.6	57971.4	57887	57301	56917.6	56738	55927.7	55427.8	54904.2	54346.5	53581.4	53189.7	52497.8	52113.3	51055.8	50698.1	49827.8	49446.4	48525.8
	459	47514.6	49234.5	50356.8	52020	53283.8	54121	54967.5	55531.1	56383.6	56884.6	56562	57098.6	56895.8	57052.2	56969.2	56392.4	56015	55838.3	55040.9	54548.9	54033.6	53484.7	52731.7	52346.3	51665.3	51287	50246.2	49894.2	49037.7	48662.3	47756.3
	460	47245.1	48955.1	50071.1	51724.8	52981.5	53814	54655.7	55216.1	56063.8	56561.9	56241.1	56774.6	56573.1	56728.5	56646	56072.5	55697.3	55521.5	54728.6	54239.4	53727.1	53181.3	52432.6	52049.3	51372.2	50996	49961.1	49611.1	48759.5	48386.3	47485.4
	[nm]	C06	X30
[nm]		470	471	472	473	474	475	476	477	478	479	480	481	482	483	484	485	486	487	488	489	490	491	492	493	494	495	496	497	498	499	500
	430	560.35	570.953	577.312	587.614	596.849	597.009	602.292	603.329	609.572	610.681	602.961	611.757	607.448	606.963	608.623	604.356	597.978	600.152	592.023	585.596	582.723	578.497	572.611	571.3	564.078	562.809	554.989	555.548	538.451	539.449	531.192
	431	559.712	570.303	576.655	586.945	596.169	596.329	601.607	602.642	608.878	609.986	602.274	611.06	606.756	606.272	607.93	603.668	597.297	599.469	591.35	584.929	582.059	577.839	571.959	570.65	563.436	562.169	554.357	554.916	537.838	538.835	530.588
	432	558.521	569.089	575.428	585.696	594.901	595.06	600.327	601.36	607.582	608.688	600.993	609.76	605.465	604.982	606.636	602.384	596.026	598.194	590.091	583.685	580.821	576.609	570.742	569.436	562.237	560.973	553.178	553.735	536.694	537.688	529.459
	433	562.308	572.948	579.329	589.667	598.934	599.095	604.397	605.437	611.702	612.815	605.068	613.894	609.57	609.084	610.749	606.468	600.067	602.249	594.092	587.642	584.759	580.519	574.612	573.297	566.049	564.776	556.928	557.489	540.332	541.334	533.048
	434	564.055	574.727	581.129	591.499	600.795	600.955	606.274	607.318	613.601	614.719	606.947	615.801	611.464	610.975	612.646	608.352	601.931	604.12	595.937	589.467	586.575	582.321	576.397	575.077	567.807	566.53	558.658	559.221	542.011	543.015	534.704
	435	572.296	583.125	589.619	600.141	609.573	609.736	615.132	616.191	622.567	623.7	615.815	624.798	620.397	619.902	621.597	617.24	610.725	612.946	604.644	598.08	595.145	590.83	584.818	583.479	576.103	574.807	566.82	567.391	549.93	550.949	542.516
	436	573.084	583.928	590.431	600.968	610.412	610.576	615.98	617.04	623.424	624.559	616.663	625.659	621.252	620.756	622.453	618.09	611.567	613.791	605.477	598.904	595.965	591.644	585.624	584.283	576.897	575.599	567.601	568.173	550.687	551.708	543.264
	437	577.058	587.977	594.526	605.135	614.646	614.81	620.251	621.319	627.748	628.891	620.94	629.998	625.56	625.061	626.77	622.377	615.808	618.047	609.676	603.057	600.098	595.747	589.685	588.335	580.898	579.591	571.537	572.113	554.506	555.534	547.031
	438	588.906	600.049	606.732	617.559	627.265	627.433	632.986	634.075	640.636	641.802	633.688	642.932	638.404	637.894	639.638	635.155	628.451	630.737	622.193	615.438	612.419	607.978	601.792	600.414	592.824	591.491	583.272	583.859	565.891	566.94	558.262
	439	589.877	601.038	607.733	618.577	628.299	628.467	634.029	635.121	641.692	642.86	634.733	643.992	639.456	638.946	640.693	636.202	629.487	631.776	623.219	616.453	613.428	608.98	602.784	601.404	593.801	592.466	584.233	584.822	566.824	567.874	559.183
	440	593.069	604.291	611.021	621.925	631.699	631.868	637.46	638.557	645.164	646.339	638.168	647.477	642.916	642.403	644.16	639.644	632.893	635.195	626.591	619.789	616.748	612.275	606.046	604.658	597.014	595.672	587.394	587.986	569.891	570.947	562.208
	441	597.345	608.648	615.427	626.409	636.253	636.424	642.056	643.161	649.816	650.999	642.769	652.146	647.552	647.035	648.804	644.257	637.457	639.775	631.109	624.258	621.195	616.69	610.416	609.018	601.319	599.967	591.63	592.226	574	575.064	566.262
	442	596.674	607.964	614.735	625.705	635.539	635.709	641.335	642.439	649.086	650.268	642.047	651.413	646.825	646.308	648.075	643.533	636.741	639.056	630.4	623.556	620.497	615.997	609.73	608.334	600.644	599.293	590.965	591.56	573.355	574.418	565.626
	443	593.468	604.697	611.432	622.343	632.124	632.293	637.889	638.987	645.598	646.774	638.597	647.913	643.349	642.835	644.593	640.075	633.319	635.622	627.013	620.206	617.163	612.687	606.454	605.065	597.416	596.072	587.79	588.382	570.274	571.331	562.587
	444	592.428	603.638	610.361	621.253	631.016	631.185	636.772	637.868	644.468	645.641	637.478	646.778	642.222	641.709	643.464	638.954	632.21	634.509	625.915	619.119	616.081	611.614	605.391	604.005	596.37	595.028	586.76	587.351	569.275	570.33	561.601
	445	593.396	604.624	611.358	622.267	632.047	632.216	637.811	638.909	645.52	646.695	638.519	647.834	643.271	642.757	644.515	639.997	633.242	635.545	626.937	620.13	617.087	612.613	606.38	604.991	597.343	596	587.718	588.31	570.205	571.262	562.518
	446	589.714	600.872	607.564	618.406	628.125	628.293	633.854	634.945	641.515	642.683	634.557	643.814	639.279	638.769	640.516	636.026	629.313	631.602	623.047	616.283	613.259	608.812	602.617	601.238	593.637	592.302	584.072	584.66	566.667	567.717	559.028
	447	591.786	602.984	609.7	620.58	630.333	630.501	636.081	637.176	643.769	644.941	636.787	646.077	641.526	641.014	642.767	638.261	631.525	633.821	625.236	618.448	615.414	610.951	604.735	603.351	595.723	594.383	586.124	586.715	568.659	569.712	560.993
	448	586.872	597.977	604.637	615.426	625.098	625.266	630.8	631.885	638.423	639.586	631.5	640.712	636.199	635.691	637.429	632.961	626.281	628.558	620.044	613.313	610.303	605.878	599.714	598.34	590.777	589.448	581.257	581.843	563.936	564.981	556.334
	449	586.337	597.432	604.086	614.866	624.529	624.696	630.225	631.31	637.842	639.003	630.924	640.128	635.619	635.112	636.849	632.384	625.71	627.986	619.48	612.754	609.748	605.326	599.167	597.795	590.238	588.911	580.728	581.313	563.423	564.467	555.827
	450	568.282	579.035	585.484	595.932	605.297	605.459	610.818	611.869	618.2	619.326	611.496	620.416	616.046	615.554	617.238	612.911	606.442	608.647	600.404	593.885	590.971	586.686	580.717	579.387	572.063	570.776	562.845	563.412	546.073	547.085	538.711
	451	558.905	569.48	575.823	586.098	595.309	595.468	600.739	601.773	607.999	609.106	601.405	610.179	605.881	605.397	607.052	602.797	596.435	598.604	590.496	584.085	581.219	577.005	571.134	569.826	562.623	561.357	553.557	554.115	537.062	538.057	529.822
	452	550.483	560.899	567.146	577.267	586.339	586.496	591.687	592.705	598.838	599.928	592.344	600.985	596.752	596.275	597.906	593.715	587.448	589.585	581.599	575.285	572.462	568.311	562.529	561.241	554.146	552.899	545.216	545.766	528.97	529.95	521.839
	453	535.415	545.546	551.622	561.465	570.289	570.442	575.491	576.481	582.446	583.506	576.129	584.534	580.417	579.953	581.539	577.463	571.368	573.446	565.679	559.537	556.792	552.754	547.13	545.878	538.977	537.765	530.292	530.826	514.49	515.443	507.554
	454	529.389	539.406	545.413	555.146	563.871	564.022	569.014	569.993	575.891	576.939	569.645	577.955	573.884	573.426	574.994	570.963	564.937	566.992	559.312	553.24	550.525	546.533	540.972	539.734	532.911	531.712	524.324	524.852	508.7	509.642	501.842
	455	518.644	528.457	534.343	543.878	552.426	552.574	557.464	558.424	564.202	565.229	558.083	566.224	562.236	561.787	563.323	559.375	553.471	555.484	547.96	542.011	539.351	535.44	529.992	528.779	522.094	520.92	513.682	514.199	498.375	499.298	491.656
	456	498.56	507.993	513.651	522.817	531.034	531.176	535.877	536.799	542.353	543.341	536.472	544.297	540.464	540.032	541.509	537.713	532.038	533.973	526.74	521.022	518.465	514.705	509.469	508.302	501.876	500.748	493.79	494.287	479.075	479.963	472.617
	457	483.453	492.601	498.087	506.975	514.943	515.081	519.64	520.534	525.92	526.877	520.216	527.805	524.087	523.669	525.101	521.42	515.917	517.793	510.78	505.234	502.755	499.11	494.032	492.9	486.669	485.575	478.828	479.31	464.559	465.42	458.297
	458	472.888	481.836	487.203	495.897	503.69	503.825	508.284	509.159	514.427	515.364	508.848	516.271	512.635	512.226	513.626	510.026	504.643	506.478	499.618	494.194	491.769	488.203	483.236	482.129	476.035	474.964	468.364	468.836	454.407	455.249	448.282
	459	455.736	464.359	469.531	477.91	485.421	485.551	489.848	490.691	495.768	496.671	490.392	497.545	494.041	493.646	494.996	491.526	486.339	488.107	481.496	476.269	473.932	470.495	465.708	464.642	458.768	457.736	451.376	451.83	437.925	438.737	432.022
	460	449.92	458.433	463.539	471.81	479.225	479.354	483.596	484.428	489.441	490.332	484.133	491.195	487.736	487.346	488.679	485.253	480.132	481.878	475.351	470.19	467.883	464.49	459.764	458.712	452.913	451.894	445.615	446.064	432.336	433.137	426.508
	[nm]	C07	X31
[nm]		470	471	472	473	474	475	476	477	478	479	480	481	482	483	484	485	486	487	488	489	490	491	492	493	494	495	496	497	498	499	500
	430	51142.1	53047.8	54375.2	56261.5	57784.3	58794.6	59710	60400.8	61332.6	61888.8	61629.5	62300	62096.2	62188.9	62101.9	61530	61162.1	60911.9	60133.7	59515.3	58949.8	58369.8	57558.9	57155.3	56301.7	55898.7	54830.1	54433.8	53455.9	53029.3	52008.1
	431	51323.7	53236.2	54568.3	56461.4	57989.6	59003.5	59922.1	60615.4	61550.5	62108.6	61848.4	62521.3	62316.7	62409.8	62322.5	61748.6	61379.4	61128.3	60347.3	59726.7	59159.2	58577.2	57763.4	57358.4	56501.7	56097.3	55024.9	54627.2	53645.8	53217.6	52192.8
	432	52000.8	53938.6	55288.2	57206.3	58754.6	59781.9	60712.6	61415	62362.5	62928	62664.4	63346.1	63138.9	63233.1	63144.7	62563.2	62189.1	61934.7	61143.4	60514.6	59939.7	59350	58525.4	58115.1	57247.1	56837.4	55750.8	55347.9	54353.5	53919.7	52881.4
	433	52607.8	54568.2	55933.6	57874	59440.4	60479.7	61421.3	62131.9	63090.4	63662.6	63395.8	64085.5	63875.9	63971.2	63881.8	63293.5	62915.1	62657.7	61857.1	61221	60639.3	60042.8	59208.6	58793.4	57915.3	57500.8	56401.6	55994	54988	54549.1	53498.7
	434	53558.9	55554.7	56944.8	58920.3	60515	61573.1	62531.7	63255.1	64231	64813.5	64541.9	65244.1	65030.6	65127.7	65036.6	64437.7	64052.4	63790.4	62975.4	62327.8	61735.5	61128.2	60278.9	59856.3	58962.3	58540.3	57421.2	57006.2	55982	55535.2	54465.8
	435	54547.2	56579.8	57995.5	60007.5	61631.7	62709.2	63685.5	64422.3	65416.2	66009.4	65732.9	66448	66230.6	66329.5	66236.7	65626.8	65234.4	64967.5	64137.4	63477.9	62874.7	62256.2	61391.2	60960.8	60050.3	59620.5	58480.8	58058.1	57015	56560	55470.9
	436	54928.2	56975	58400.7	60426.6	62062.2	63147.3	64130.4	64872.4	65873.1	66470.5	66192	66912.1	66693.2	66792.8	66699.4	66085.2	65690	65421.3	64585.5	63921.3	63313.9	62691	61820.1	61386.6	60469.8	60037	58889.3	58463.7	57413.3	56955.1	55858.3
	437	55768.9	57847.1	59294.6	61351.6	63012.1	64113.8	65112	65865.3	66881.4	67487.9	67205.2	67936.3	67714.1	67815.1	67720.3	67096.7	66695.5	66422.7	65574	64899.7	64283	63650.6	62766.3	62326.2	61395.3	60956	59790.7	59358.5	58292.1	57826.9	56713.3
	438	56920.8	59041.9	60519.3	62618.8	64313.6	65438.1	66456.9	67225.7	68262.8	68881.9	68593.3	69339.5	69112.7	69215.8	69119.1	68482.6	68073.1	67794.6	66928.4	66240.2	65610.8	64965.3	64062.7	63613.6	62663.4	62215	61025.6	60584.6	59496.1	59021.3	57884.7
	439	58447.3	60625.3	62142.3	64298.1	66038.4	67193	68239.1	69028.6	70093.5	70729.2	70432.8	71199.1	70966.1	71072.1	70972.7	70319.1	69898.7	69612.7	68723.3	68016.6	67370.3	66707.5	65780.8	65319.5	64343.9	63883.5	62662.2	62209.3	61091.7	60604.1	59437.1
	440	58774.2	60964.3	62489.8	64657.7	66407.7	67568.8	68620.7	69414.6	70485.5	71124.7	70826.7	71597.2	71363	71469.6	71369.6	70712.4	70289.6	70002	69107.7	68397	67747.1	67080.6	66148.7	65684.8	64703.8	64240.7	63012.7	62557.2	61433.3	60943	59769.5
	441	59852.1	62082.4	63635.8	65843.5	67625.6	68808	69879.2	70687.7	71778.2	72429.1	72125.6	72910.3	72671.8	72780.3	72678.5	72009.2	71578.7	71285.8	70375.1	69651.3	68989.6	68310.8	67361.8	66889.5	65890.4	65418.9	64168.3	63704.5	62560	62060.7	60865.6
	442	60713.3	62975.7	64551.5	66790.9	68598.7	69798.1	70884.7	71704.8	72811	73471.3	73163.5	73959.4	73717.5	73827.5	73724.3	73045.4	72608.6	72311.6	71387.7	70653.6	69982.3	69293.8	68331.1	67852	66838.6	66360.2	65091.6	64621.2	63460.2	62953.7	61741.4
	443	61226.9	63508.5	65097.6	67355.9	69179	70388.5	71484.4	72311.4	73427	74092.8	73782.4	74585.1	74341.1	74452.1	74348	73663.3	73222.9	72923.3	71991.6	71251.3	70574.3	69880	68909.1	68426	67404	66921.6	65642.3	65167.8	63997	63486.3	62263.7
	444	61701.2	64000.4	65601.8	67877.6	69714.8	70933.7	72038.1	72871.5	73995.7	74666.7	74353.9	75162.8	74916.9	75028.8	74923.9	74233.9	73790	73488.2	72549.2	71803.2	71120.9	70421.2	69442.9	68956	67926.1	67439.9	66150.7	65672.6	64492.7	63978	62746
	445	62808.5	65149	66779.2	69095.8	70966	72206.8	73330.9	74179.3	75323.7	76006.8	75688.3	76511.7	76261.4	76375.3	76268.5	75566.2	75114.3	74807	73851.3	73091.8	72397.3	71685.1	70689.2	70193.5	69145.1	68650.3	67337.9	66851.2	65650.2	65126.2	63872.1
	446	63630	66001.1	67652.6	69999.6	71894.2	73151.2	74290.1	75149.6	76308.9	77000.9	76678.3	77512.5	77258.9	77374.2	77266.1	76554.5	76096.8	75785.5	74817.2	74047.8	73344.2	72622.7	71613.7	71111.6	70049.5	69548.2	68218.7	67725.6	66508.8	65978	64707.5
	447	64602.9	67010.3	68687	71069.9	72993.5	74269.7	75426	76298.6	77475.7	78178.3	77850.7	78697.7	78440.2	78557.3	78447.5	77725.1	77260.3	76944.3	75961.2	75180	74465.7	73733.1	72708.7	72198.9	71120.6	70611.6	69261.8	68761.1	67525.8	66986.9	65696.9
	448	65100	67525.8	69215.5	71616.7	73555.1	74841.1	76006.3	76885.7	78071.8	78779.8	78449.7	79303.2	79043.7	79161.7	79051	78323.1	77854.7	77536.3	76545.6	75758.4	75038.6	74300.4	73268.1	72754.4	71667.8	71154.9	69794.6	69290.2	68045.3	67502.2	66202.4
	449	65978.1	68436.6	70149.1	72582.6	74547.2	75850.6	77031.5	77922.7	79124.8	79842.4	79507.8	80372.8	80109.9	80229.5	80117.3	79379.5	78904.9	78582.1	77578.1	76780.3	76050.7	75302.6	74256.4	73735.7	72634.4	72114.6	70736	70224.8	68963.1	68412.7	67095.3
	450	65494.3	67934.8	69634.7	72050.4	74000.5	75294.4	76466.6	77351.3	78544.6	79256.9	78924.8	79783.5	79522.4	79641.2	79529.8	78797.4	78326.3	78005.8	77009.2	76217.3	75493.1	74750.4	73711.9	73195	72101.8	71585.8	70217.3	69709.8	68457.4	67911.1	66603.3
	451	65352.4	67787.7	69483.9	71894.4	73840.3	75131.4	76301.1	77183.8	78374.5	79085.3	78753.9	79610.7	79350.3	79468.7	79357.6	78626.8	78156.7	77837	76842.5	76052.2	75329.6	74588.5	73552.3	73036.6	71945.7	71430.8	70065.3	69558.9	68309.2	67764	66459.1
	452	65667.2	68114.2	69818.5	72240.6	74195.9	75493.2	76668.5	77555.5	78752	79466.1	79133.2	79994.1	79732.4	79851.4	79739.8	79005.5	78533.1	78211.8	77212.5	76418.5	75692.4	74947.8	73906.5	73388.3	72292.2	71774.8	70402.7	69893.9	68638.2	68090.4	66779.2
	453	65553	67995.7	69697.2	72115	74066.9	75361.9	76535.2	77420.7	78615.1	79328	78995.6	79855	79593.8	79712.6	79601.1	78868.1	78396.5	78075.8	77078.3	76285.6	75560.8	74817.4	73778	73260.7	72166.5	71650	70280.3	69772.3	68518.8	67972	66663.1
	454	65581.7	68025.5	69727.7	72146.6	74099.4	75394.9	76568.7	77454.6	78649.5	79362.7	79030.2	79890	79628.6	79747.5	79636	78902.7	78430.9	78110	77112	76319	75593.9	74850.2	73810.3	73292.8	72198.1	71681.4	70311.1	69802.9	68548.8	68001.7	66692.3
	455	65297.3	67730.5	69425.3	71833.7	73778	75068	76236.7	77118.7	78308.4	79018.5	78687.5	79543.5	79283.3	79401.6	79290.6	78560.5	78090.7	77771.3	76777.6	75988.1	75266.1	74525.6	73490.2	72974.9	71885	71370.5	70006.2	69500.2	68251.5	67706.8	66403
	456	64051.6	66438.3	68100.8	70463.3	72370.5	73635.8	74782.2	75647.4	76814.4	77511	77186.3	78026	77770.7	77886.8	77777.9	77061.7	76600.9	76287.5	75312.9	74538.4	73830.1	73103.8	72088.2	71582.7	70513.6	70008.9	68670.6	68174.3	66949.4	66415.1	65136.2
	457	63913.4	66295.1	67953.9	70311.3	72214.4	73477	74620.9	75484.3	76648.8	77343.8	77019.8	77857.7	77603	77718.8	77610.2	76895.5	76435.7	76123	75150.4	74377.6	73670.9	72946.1	71932.7	71428.3	70361.5	69857.9	68522.5	68027.2	66805	66271.9	64995.7
	458	63723	66097.5	67751.4	70101.8	71999.2	73258.1	74398.6	75259.4	76420.4	77113.4	76790.3	77625.7	77371.8	77487.3	77378.9	76666.4	76208	75896.2	74926.5	74156	73451.4	72728.8	71718.4	71215.5	70151.9	69649.8	68318.3	67824.5	66606	66074.4	64802.1
	459	62856.6	65198.9	66830.3	69148.7	71020.3	72262.1	73387.1	74236.1	75381.4	76065	75746.3	76570.3	76319.8	76433.8	76326.9	75624	75171.8	74864.3	73907.8	73147.8	72452.8	71740	70743.3	70247.3	69198.1	68702.9	67389.5	66902.4	65700.4	65176.1	63921
	460	62545.2	64875.9	66499.2	68806.2	70668.5	71904.1	73023.5	73868.4	75007.9	75688.2	75371	76191	75941.8	76055.1	75948.8	75249.4	74799.4	74493.5	73541.7	72785.4	72093.8	71384.6	70392.8	69899.3	68855.3	68362.5	67055.6	66571	65375	64853.2	63604.4
	[nm]	C08	X32
[nm]		470	471	472	473	474	475	476	477	478	479	480	481	482	483	484	485	486	487	488	489	490	491	492	493	494	495	496	497	498	499	500
	430	45920.9	47623.9	48888.7	50584.7	51958	52868.5	53717.4	54423.1	55237.5	55821.5	55527.2	56207.1	55991.8	56175.2	56086.8	55565	55214.7	55085.3	54292.2	53779.5	53317.7	52748.5	52056.6	51670.2	50942.9	50541	49558	49241.3	48399.7	47947.3	47149.8
	431	46087.9	47797.2	49066.5	50768.7	52147	53060.8	53912.8	54621	55438.4	56024.5	55729.2	56411.5	56195.4	56379.6	56290.9	55767.2	55415.6	55285.7	54489.7	53975.2	53511.7	52940.4	52246	51858.2	51128.2	50724.9	49738.2	49420.5	48575.7	48121.7	47321.3
	432	46683.5	48414.8	49700.6	51424.8	52820.8	53746.5	54609.5	55326.9	56154.8	56748.5	56449.4	57140.5	56921.6	57108.2	57018.3	56487.8	56131.7	56000.1	55193.8	54672.7	54203.2	53624.6	52921.1	52528.3	51788.9	51380.4	50381	50059.1	49203.5	48743.6	47932.8
	433	47217.4	48968.6	50269	52012.9	53425	54361.2	55234.1	55959.7	56797.1	57397.6	57095	57794.1	57572.7	57761.3	57670.4	57133.9	56773.7	56640.6	55825.1	55298	54823.1	54237.9	53526.4	53129.1	52381.2	51968	50957.2	50631.6	49766.2	49301.1	48481
	434	48045.4	49827.3	51150.6	52925	54361.8	55314.5	56202.7	56941	57793.1	58404.1	58096.3	58807.5	58582.3	58774.2	58681.7	58135.8	57769.3	57633.8	56804.1	56267.7	55784.5	55189	54465.1	54060.8	53299.8	52879.3	51850.8	51519.5	50638.9	50165.6	49331.2
	435	48782.3	50591.5	51935.1	53736.8	55195.6	56162.9	57064.7	57814.3	58679.5	59299.9	58987.3	59709.5	59480.8	59675.7	59581.8	59027.5	58655.4	58517.8	57675.3	57130.7	56640.1	56035.5	55300.4	54889.9	54117.3	53690.4	52646.1	52309.7	51415.6	50935.1	50087.9
	436	49216.2	51041.5	52397	54214.7	55686.5	56662.4	57572.2	58328.5	59201.4	59827.3	59512	60240.6	60009.8	60206.4	60111.7	59552.5	59177	59038.3	58188.3	57638.8	57143.9	56533.9	55792.3	55378.1	54598.6	54167.9	53114.3	52775	51872.9	51388.1	50533.3
	437	49919	51770.4	53145.3	54988.9	56481.8	57471.6	58394.4	59161.5	60046.8	60681.7	60361.8	61100.8	60866.8	61066.2	60970.1	60402.9	60022.1	59881.4	59019.2	58462	57959.9	57341.2	56589	56169	55378.3	54941.5	53872.8	53528.6	52613.7	52121.9	51255
	438	50969.4	52859.6	54263.5	56145.9	57670.2	58680.8	59623	60406.3	61310.2	61958.4	61631.9	62386.4	62147.4	62351.1	62253	61673.8	61285	61141.3	60261	59692	59179.4	58547.7	57779.7	57350.8	56543.5	56097.4	55006.3	54654.9	53720.7	53218.6	52333.4
	439	52235.9	54173.2	55611.9	57541.1	59103.2	60139	61104.6	61907.3	62833.7	63498.1	63163.4	63936.7	63691.8	63900.5	63799.9	63206.4	62807.9	62660.6	61758.5	61175.3	60650	60002.5	59215.5	58775.9	57948.5	57491.4	56373.2	56013	55055.6	54541	53633.9
	440	52627.6	54579.4	56028.8	57972.5	59546.4	60589.9	61562.7	62371.5	63304.8	63974.2	63637	64416.1	64169.3	64379.6	64278.3	63680.3	63278.8	63130.4	62221.5	61634	61104.8	60452.4	59659.4	59216.6	58383	57922.5	56795.8	56433	55468.4	54950	54036
	441	53511.4	55496	56969.8	58946.1	60546.4	61607.5	62596.7	63419	64368	65048.6	64705.7	65497.9	65247	65460.8	65357.8	64749.7	64341.5	64190.6	63266.5	62669.1	62131	61467.7	60661.4	60211.1	59363.5	58895.3	57749.7	57380.7	56400	55872.8	54943.5
	442	54326.9	56341.7	57838	59844.4	61469.1	62546.3	63550.6	64385.5	65348.9	66039.9	65691.8	66496	66241.3	66458.4	66353.8	65736.5	65322.1	65168.9	64230.6	63624.1	63077.8	62404.4	61585.8	61128.7	60268.2	59792.8	58629.8	58255.2	57259.5	56724.3	55780.8
	443	54722.9	56752.4	58259.6	60280.7	61917.2	63002.3	64013.9	64854.8	65825.3	66521.3	66170.7	66980.8	66724.2	66942.8	66837.5	66215.7	65798.3	65644	64698.9	64088	63537.6	62859.3	62034.8	61574.3	60707.5	60228.7	59057.2	58679.9	57676.9	57137.8	56187.4
	444	55174.2	57220.4	58740.1	60777.8	62427.8	63521.8	64541.8	65389.6	66368.2	67069.9	66716.3	67533.2	67274.4	67494.9	67388.7	66761.7	66340.9	66185.3	65232.4	64616.5	64061.6	63377.7	62546.3	62082.1	61208.2	60725.3	59544.2	59163.8	58152.5	57609	56650.8
	445	56109.2	58190.1	59735.5	61807.8	63485.7	64598.3	65635.5	66497.8	67492.8	68206.4	67846.9	68677.6	68414.5	68638.7	68530.7	67893.1	67465.1	67306.9	66337.8	65711.5	65147.2	64451.7	63606.3	63134.1	62245.4	61754.4	60553.2	60166.4	59138	58585.2	57610.8
	446	56840.3	58948.3	60513.8	62613.1	64312.9	65440	66490.7	67364.2	68372.3	69095.2	68731	69572.5	69305.9	69533	69423.6	68777.8	68344.2	68183.9	67202.2	66567.7	65996.1	65291.5	64435.1	63956.8	63056.5	62559.1	61342.3	60950.4	59908.5	59348.6	58361.5
	447	57615.4	59752.2	61339	63466.9	65189.9	66332.4	67397.4	68282.8	69304.6	70037.4	69668.2	70521.2	70251	70481.2	70370.3	69715.6	69276.1	69113.7	68118.6	67475.4	66896	66181.9	65313.7	64828.9	63916.3	63412.1	62178.7	61781.5	60725.5	60157.9	59157.3
	448	58053.3	60206.3	61805.2	63949.3	65685.3	66836.5	67909.6	68801.7	69831.3	70569.6	70197.7	71057.1	70784.9	71016.8	70905.1	70245.4	69802.6	69638.9	68636.3	67988.2	67404.4	66684.8	65810.1	65321.6	64402.1	63894.1	62651.3	62251	61187	60615.1	59606.9
	449	58859.9	61042.8	62664	64837.8	66598.1	67765.2	68853.2	69757.7	70801.6	71550.2	71173.1	72044.4	71768.5	72003.6	71890.3	71221.5	70772.5	70606.5	69590	68932.9	68341	67611.4	66724.5	66229.2	65296.9	64781.9	63521.8	63116	62037.2	61457.3	60435.1
	450	58372.8	60537.7	62145.4	64301.3	66047	67204.4	68283.5	69180.5	70215.7	70958.1	70584.1	71448.3	71174.6	71407.8	71295.4	70632.1	70186.9	70022.3	69014.1	68362.5	67775.5	67051.9	66172.4	65681.2	64756.6	64245.8	62996.2	62593.7	61523.8	60948.8	59935
	451	58271.3	60432.4	62037.3	64189.4	65932.1	67087.5	68164.7	69060.2	70093.6	70834.7	70461.3	71324	71050.8	71283.6	71171.4	70509.3	70064.8	69900.5	68894.1	68243.6	67657.6	66935.3	66057.3	65566.9	64644	64134	62886.6	62484.8	61416.8	60842.7	59830.7
	452	58536.8	60707.7	62319.9	64481.9	66232.4	67393.1	68475.2	69374.8	70412.9	71157.4	70782.3	71648.9	71374.5	71608.3	71495.7	70830.5	70384	70218.9	69208	68554.5	67965.8	67240.2	66358.2	65865.6	64938.5	64426.2	63173.1	62769.5	61696.6	61119.9	60103.3
	453	58422.2	60588.8	62197.9	64355.6	66102.7	67261.2	68341.1	69238.9	70275.1	71018.1	70643.7	71508.6	71234.7	71468.1	71355.7	70691.8	70246.2	70081.4	69072.4	68420.2	67832.7	67108.6	66228.3	65736.7	64811.3	64300.1	63049.4	62646.6	61575.8	61000.3	59985.6
	454	58331.2	60494.5	62101	64255.4	65999.8	67156.4	68234.7	69131.1	70165.6	70907.5	70533.7	71397.3	71123.8	71356.8	71244.5	70581.7	70136.8	69972.3	68964.9	68313.7	67727.1	67004.1	66125.1	65634.3	64710.4	64199.9	62951.2	62549	61479.9	60905.3	59892.2
	455	58137	60293.1	61894.3	64041.5	65780.1	66932.8	68007.5	68900.9	69932	70671.4	70298.9	71159.5	70886.9	71119.2	71007.3	70346.7	69903.2	69739.3	68735.2	68086.2	67501.6	66781	65905	65415.7	64494.9	63986.2	62741.6	62340.8	61275.2	60702.5	59692.8
	456	57029.5	59144.5	60715.2	62821.5	64527	65657.8	66712	67588.4	68599.8	69325.1	68959.7	69804	69536.6	69764.4	69654.7	69006.6	68571.6	68410.8	67425.9	66789.2	66215.7	65508.8	64649.5	64169.6	63266.3	62767.3	61546.4	61153.2	60107.9	59546.1	58555.7
	457	56862.8	58971.7	60537.8	62637.9	64338.4	65465.9	66517.1	67390.9	68399.4	69122.5	68758.2	69600	69333.4	69560.6	69451.1	68805	68371.2	68210.9	67228.8	66594.1	66022.2	65317.4	64460.6	63982.1	63081.4	62583.9	61366.6	60974.5	59932.3	59372.1	58384.6
	458	56631.2	58731.5	60291.3	62382.8	64076.4	65199.3	66246.2	67116.4	68120.8	68841	68478.2	69316.6	69051	69277.3	69168.3	68524.8	68092.8	67933.1	66955	66322.8	65753.3	65051.4	64198.1	63721.5	62824.5	62329	61116.6	60726.2	59688.2	59130.3	58146.8
	459	55858.9	57930.5	59469	61532.1	63202.5	64310.1	65342.7	66201.1	67191.8	67902.2	67544.3	68371.2	68109.3	68332.5	68225	67590.3	67164.2	67006.7	66041.9	65418.4	64856.6	64164.2	63322.6	62852.5	61967.8	61479	60283.1	59898	58874.2	58323.9	57353.8
	460	55564.1	57624.8	59155.1	61207.3	62869	63970.7	64997.9	65851.7	66837.2	67543.8	67187.8	68010.4	67749.8	67971.8	67864.9	67233.5	66809.7	66653	65693.4	65073.1	64514.3	63825.6	62988.3	62520.8	61640.7	61154.5	59965	59581.9	58563.4	58016.1	57051.1
	[nm]	C09	X33
[nm]		470	471	472	473	474	475	476	477	478	479	480	481	482	483	484	485	486	487	488	489	490	491	492	493	494	495	496	497	498	499	500
	430	1399	1434.37	1452.65	1487.94	1510.39	1528.36	1538.58	1544.99	1564.41	1570.53	1560.31	1572.35	1568.67	1568.12	1564.98	1556.43	1541.39	1536.39	1513.31	1509.64	1494.97	1480.13	1456.49	1460.23	1431.88	1428.24	1401.3	1395.75	1375.1	1359.44	1339.96
	431	1401.38	1436.82	1455.12	1490.48	1512.97	1530.96	1541.21	1547.62	1567.08	1573.21	1562.97	1575.03	1571.34	1570.8	1567.64	1559.08	1544.02	1539.01	1515.89	1512.21	1497.51	1482.65	1458.97	1462.71	1434.32	1430.68	1403.69	1398.13	1377.44	1361.76	1342.24
	432	1421.2	1457.13	1475.69	1511.55	1534.36	1552.61	1563	1569.5	1589.23	1595.45	1585.07	1597.3	1593.56	1593	1589.81	1581.13	1565.85	1560.77	1537.32	1533.59	1518.69	1503.61	1479.6	1483.4	1454.6	1450.9	1423.53	1417.9	1396.92	1381.01	1361.22
	433	1431.63	1467.83	1486.53	1522.65	1545.62	1564.01	1574.47	1581.02	1600.9	1607.17	1596.7	1609.02	1605.26	1604.7	1601.48	1592.73	1577.34	1572.23	1548.6	1544.85	1529.84	1514.65	1490.46	1494.29	1465.27	1461.55	1433.98	1428.31	1407.17	1391.15	1371.21
	434	1455.89	1492.7	1511.71	1548.44	1571.81	1590.51	1601.15	1607.81	1628.02	1634.4	1623.76	1636.29	1632.45	1631.89	1628.61	1619.72	1604.07	1598.87	1574.84	1571.03	1555.76	1540.31	1515.71	1519.6	1490.1	1486.32	1458.28	1452.51	1431.01	1414.72	1394.44
	435	1474.45	1511.73	1530.99	1568.18	1591.85	1610.78	1621.56	1628.31	1648.78	1655.23	1644.46	1657.15	1653.26	1652.69	1649.38	1640.37	1624.52	1619.25	1594.92	1591.05	1575.59	1559.95	1535.04	1538.98	1509.1	1505.27	1476.87	1471.03	1449.26	1432.76	1412.22
	436	1487.98	1525.61	1545.04	1582.58	1606.46	1625.57	1636.45	1643.26	1663.91	1670.43	1659.55	1672.36	1668.44	1667.86	1664.52	1655.43	1639.43	1634.12	1609.56	1605.66	1590.05	1574.27	1549.13	1553.1	1522.95	1519.09	1490.43	1484.53	1462.56	1445.91	1425.19
	437	1500.81	1538.76	1558.36	1596.22	1620.31	1639.58	1650.55	1657.42	1678.26	1684.83	1673.86	1686.78	1682.83	1682.24	1678.87	1669.7	1653.56	1648.2	1623.44	1619.5	1603.76	1587.84	1562.48	1566.49	1536.08	1532.18	1503.28	1497.33	1475.17	1458.38	1437.47
	438	1532.74	1571.5	1591.51	1630.18	1654.78	1674.46	1685.67	1692.68	1713.96	1720.67	1709.47	1722.66	1718.62	1718.03	1714.58	1705.22	1688.74	1683.27	1657.97	1653.96	1637.88	1621.62	1595.72	1599.82	1568.76	1564.78	1535.26	1529.18	1506.55	1489.4	1468.05
	439	1561.93	1601.42	1621.82	1661.23	1686.29	1706.35	1717.77	1724.92	1746.6	1753.44	1742.02	1755.47	1751.35	1750.75	1747.23	1737.69	1720.9	1715.32	1689.55	1685.45	1669.07	1652.5	1626.11	1630.28	1598.63	1594.58	1564.5	1558.3	1535.24	1517.76	1496.01
	440	1573.92	1613.72	1634.28	1673.98	1699.24	1719.46	1730.96	1738.16	1760.01	1766.9	1755.4	1768.95	1764.8	1764.19	1760.65	1751.04	1734.12	1728.5	1702.52	1698.4	1681.89	1665.19	1638.6	1642.8	1610.91	1606.82	1576.51	1570.27	1547.03	1529.42	1507.5
	441	1588.71	1628.88	1649.63	1689.71	1715.21	1735.61	1747.22	1754.49	1776.55	1783.51	1771.9	1785.57	1781.39	1780.77	1777.2	1767.49	1750.41	1744.74	1718.52	1714.35	1697.69	1680.84	1653.99	1658.24	1626.05	1621.92	1591.32	1585.02	1561.57	1543.79	1521.66
	442	1606.89	1647.52	1668.51	1709.05	1734.84	1755.47	1767.22	1774.57	1796.88	1803.92	1792.17	1806	1801.77	1801.15	1797.53	1787.72	1770.44	1764.7	1738.18	1733.97	1717.12	1700.07	1672.92	1677.22	1644.65	1640.48	1609.53	1603.16	1579.44	1561.46	1539.08
	443	1612.38	1653.15	1674.21	1714.89	1740.76	1761.47	1773.25	1780.63	1803.02	1810.08	1798.29	1812.17	1807.93	1807.3	1803.67	1793.82	1776.49	1770.73	1744.12	1739.9	1722.99	1705.88	1678.64	1682.95	1650.27	1646.08	1615.03	1608.64	1584.83	1566.79	1544.33
	444	1619.81	1660.77	1681.92	1722.79	1748.78	1769.59	1781.43	1788.84	1811.33	1818.42	1806.58	1820.52	1816.26	1815.63	1811.98	1802.09	1784.67	1778.89	1752.16	1747.91	1730.92	1713.74	1686.37	1690.7	1657.88	1653.67	1622.47	1616.05	1592.14	1574.01	1551.45
	445	1639.54	1681	1702.41	1743.77	1770.08	1791.14	1803.12	1810.63	1833.39	1840.57	1828.59	1842.7	1838.38	1837.74	1834.05	1824.04	1806.41	1800.56	1773.5	1769.2	1752.01	1734.62	1706.91	1711.29	1678.07	1673.81	1642.23	1635.74	1611.53	1593.18	1570.35
	446	1647.09	1688.74	1710.25	1751.8	1778.24	1799.39	1811.43	1818.97	1841.83	1849.04	1837.01	1851.18	1846.85	1846.21	1842.5	1832.44	1814.73	1808.85	1781.67	1777.35	1760.08	1742.61	1714.77	1719.18	1685.8	1681.52	1649.8	1643.27	1618.95	1600.52	1577.58
	447	1659.17	1701.12	1722.79	1764.65	1791.28	1812.58	1824.71	1832.31	1855.34	1862.6	1850.48	1864.76	1860.39	1859.74	1856.01	1845.88	1828.04	1822.11	1794.73	1790.38	1772.98	1755.38	1727.35	1731.78	1698.16	1693.85	1661.9	1655.32	1630.82	1612.26	1589.15
	448	1661.43	1703.44	1725.14	1767.06	1793.72	1815.06	1827.2	1834.8	1857.87	1865.14	1853	1867.3	1862.93	1862.28	1858.54	1848.4	1830.53	1824.6	1797.18	1792.83	1775.4	1757.78	1729.7	1734.14	1700.48	1696.16	1664.16	1657.58	1633.05	1614.45	1591.31
	449	1677.79	1720.21	1742.12	1784.45	1811.38	1832.92	1845.19	1852.86	1876.16	1883.5	1871.24	1885.68	1881.26	1880.61	1876.84	1866.59	1848.55	1842.56	1814.87	1810.47	1792.88	1775.08	1746.73	1751.21	1717.21	1712.86	1680.54	1673.89	1649.12	1630.35	1606.98
	450	1656.18	1698.06	1719.69	1761.48	1788.05	1809.32	1821.43	1829.01	1852	1859.25	1847.15	1861.4	1857.04	1856.4	1852.67	1842.56	1824.75	1818.84	1791.51	1787.16	1769.79	1752.23	1724.24	1728.67	1695.1	1690.8	1658.91	1652.34	1627.89	1609.36	1586.29
	451	1639.54	1681	1702.41	1743.77	1770.08	1791.14	1803.12	1810.63	1833.39	1840.57	1828.59	1842.7	1838.38	1837.74	1834.05	1824.04	1806.41	1800.56	1773.5	1769.2	1752.01	1734.62	1706.91	1711.29	1678.07	1673.81	1642.23	1635.74	1611.53	1593.18	1570.35
	452	1637.63	1679.04	1700.43	1741.74	1768.02	1789.06	1801.02	1808.52	1831.26	1838.42	1826.46	1840.55	1836.24	1835.6	1831.92	1821.92	1804.31	1798.46	1771.44	1767.14	1749.97	1732.6	1704.92	1709.3	1676.12	1671.86	1640.32	1633.83	1609.65	1591.33	1568.52
	453	1619.36	1660.3	1681.45	1722.3	1748.29	1769.09	1780.93	1788.34	1810.82	1817.91	1806.07	1820.01	1815.75	1815.12	1811.47	1801.58	1784.17	1778.39	1751.67	1747.42	1730.44	1713.26	1685.9	1690.23	1657.41	1653.2	1622.02	1615.6	1591.69	1573.57	1551.01
	454	1603.34	1643.88	1664.82	1705.27	1731	1751.59	1763.31	1770.65	1792.91	1799.93	1788.21	1802.01	1797.79	1797.16	1793.56	1783.76	1766.53	1760.8	1734.34	1730.14	1713.32	1696.32	1669.22	1673.51	1641.02	1636.85	1605.97	1599.62	1575.95	1558	1535.67
	455	1576.24	1616.09	1636.68	1676.44	1701.74	1721.98	1733.5	1740.72	1762.6	1769.5	1757.98	1771.55	1767.4	1766.79	1763.24	1753.61	1736.66	1731.04	1705.02	1700.89	1684.36	1667.64	1641.01	1645.22	1613.28	1609.18	1578.83	1572.58	1549.31	1531.67	1509.71
	456	1535.89	1574.73	1594.79	1633.53	1658.18	1677.91	1689.13	1696.16	1717.49	1724.21	1712.99	1726.2	1722.16	1721.56	1718.11	1708.73	1692.21	1686.73	1661.38	1657.36	1641.25	1624.96	1599	1603.11	1571.98	1567.99	1538.42	1532.33	1509.65	1492.46	1471.07
	457	1518.98	1557.39	1577.23	1615.55	1639.93	1659.44	1670.54	1677.49	1698.58	1705.23	1694.13	1707.2	1703.2	1702.61	1699.2	1689.92	1673.58	1668.16	1643.09	1639.11	1623.18	1607.07	1581.4	1585.46	1554.68	1550.73	1521.48	1515.46	1493.03	1476.03	1454.88
	458	1492.13	1529.86	1549.35	1586.99	1610.94	1630.1	1641.01	1647.84	1668.55	1675.08	1664.18	1677.02	1673.09	1672.51	1669.16	1660.04	1644	1638.67	1614.05	1610.14	1594.49	1578.66	1553.45	1557.43	1527.2	1523.32	1494.58	1488.67	1466.64	1449.94	1429.16
	459	1450.33	1487.01	1505.95	1542.54	1565.81	1584.44	1595.04	1601.68	1621.81	1628.16	1617.56	1630.04	1626.23	1625.66	1622.4	1613.54	1597.95	1592.77	1568.83	1565.03	1549.82	1534.44	1509.93	1513.81	1484.42	1480.65	1452.72	1446.97	1425.55	1409.32	1389.13
	460	1428.46	1464.58	1483.23	1519.27	1542.19	1560.54	1570.98	1577.52	1597.35	1603.6	1593.16	1605.46	1601.7	1601.14	1597.93	1589.2	1573.85	1568.74	1545.17	1541.43	1526.45	1511.29	1487.16	1490.97	1462.03	1458.31	1430.81	1425.14	1404.05	1388.07	1368.17
	[nm]	C10	X34
[nm]		470	471	472	473	474	475	476	477	478	479	480	481	482	483	484	485	486	487	488	489	490	491	492	493	494	495	496	497	498	499	500
	430	1443.16	1475.07	1487.52	1513.23	1537.58	1544.21	1560.52	1566.24	1576.46	1581.51	1569.51	1583.95	1570.29	1583.13	1577.19	1556.44	1556.52	1549.36	1530.62	1519.65	1506.63	1499.67	1478.39	1474.26	1451.49	1452.96	1424.16	1417.59	1399.42	1393.05	1367.12
	431	1442.09	1473.97	1486.42	1512.11	1536.44	1543.06	1559.36	1565.08	1575.29	1580.34	1568.34	1582.78	1569.12	1581.96	1576.02	1555.28	1555.36	1548.21	1529.48	1518.52	1505.51	1498.56	1477.29	1473.17	1450.42	1451.88	1423.11	1416.54	1398.38	1392.01	1366.1
	432	1464.1	1496.46	1509.1	1535.18	1559.88	1566.6	1583.15	1588.96	1599.33	1604.45	1592.27	1606.93	1593.07	1606.1	1600.07	1579.01	1579.09	1571.83	1552.82	1541.69	1528.48	1521.42	1499.83	1495.65	1472.55	1474.04	1444.82	1438.15	1419.71	1413.25	1386.95
	433	1465.92	1498.33	1510.98	1537.09	1561.83	1568.56	1585.13	1590.94	1601.32	1606.45	1594.26	1608.93	1595.06	1608.1	1602.07	1580.98	1581.06	1573.79	1554.76	1543.62	1530.39	1523.32	1501.7	1497.51	1474.39	1475.88	1446.63	1439.95	1421.49	1415.02	1388.68
	434	1482.53	1515.3	1528.1	1554.51	1579.52	1586.33	1603.08	1608.96	1619.46	1624.65	1612.32	1627.16	1613.12	1626.32	1620.22	1598.89	1598.97	1591.62	1572.37	1561.1	1547.72	1540.58	1518.71	1514.48	1491.09	1492.59	1463.01	1456.26	1437.59	1431.05	1404.41
	435	1507.3	1540.62	1553.63	1580.48	1605.92	1612.83	1629.87	1635.85	1646.52	1651.8	1639.26	1654.35	1640.08	1653.49	1647.29	1625.61	1625.69	1618.21	1598.64	1587.19	1573.58	1566.32	1544.09	1539.78	1516	1517.54	1487.46	1480.59	1461.61	1454.96	1427.88
	436	1504.63	1537.9	1550.88	1577.68	1603.07	1609.98	1626.98	1632.95	1643.61	1648.87	1636.36	1651.42	1637.18	1650.56	1644.37	1622.73	1622.81	1615.35	1595.81	1584.38	1570.8	1563.55	1541.36	1537.06	1513.32	1514.85	1484.82	1477.97	1459.02	1452.38	1425.35
	437	1513.54	1547	1560.06	1587.02	1612.56	1619.51	1636.61	1642.62	1653.34	1658.63	1646.04	1661.2	1646.87	1660.33	1654.11	1632.34	1632.42	1624.91	1605.26	1593.75	1580.1	1572.8	1550.48	1546.16	1522.28	1523.82	1493.61	1486.72	1467.66	1460.98	1433.79
	438	1528.97	1562.78	1575.97	1603.21	1629.01	1636.03	1653.3	1659.37	1670.2	1675.55	1662.83	1678.14	1663.66	1677.27	1670.98	1648.98	1649.07	1641.48	1621.63	1610.01	1596.21	1588.84	1566.3	1561.92	1537.8	1539.36	1508.85	1501.88	1482.63	1475.88	1448.41
	439	1552.24	1586.56	1599.95	1627.61	1653.8	1660.92	1678.46	1684.62	1695.62	1701.05	1688.14	1703.68	1688.98	1702.79	1696.4	1674.08	1674.16	1666.46	1646.31	1634.51	1620.5	1613.02	1590.13	1585.69	1561.2	1562.78	1531.81	1524.74	1505.19	1498.34	1470.45
	440	1549.79	1584.06	1597.43	1625.04	1651.19	1658.3	1675.81	1681.96	1692.94	1698.36	1685.47	1700.99	1686.31	1700.1	1693.73	1671.43	1671.52	1663.83	1643.71	1631.93	1617.95	1610.47	1587.62	1583.19	1558.74	1560.32	1529.39	1522.33	1502.81	1495.97	1468.13
	441	1560.7	1595.2	1608.67	1636.47	1662.81	1669.97	1687.61	1693.8	1704.85	1710.31	1697.33	1712.96	1698.18	1712.07	1705.65	1683.2	1683.28	1675.54	1655.27	1643.41	1629.33	1621.81	1598.79	1594.33	1569.71	1571.3	1540.15	1533.04	1513.39	1506.5	1478.46
	442	1565.68	1600.3	1613.8	1641.7	1668.12	1675.3	1693	1699.21	1710.29	1715.77	1702.75	1718.43	1703.6	1717.53	1711.09	1688.57	1688.66	1680.89	1660.56	1648.66	1634.53	1626.99	1603.9	1599.42	1574.72	1576.31	1545.07	1537.94	1518.22	1511.31	1483.18
	443	1557.27	1591.7	1605.13	1632.87	1659.15	1666.3	1683.9	1690.08	1701.11	1706.55	1693.6	1709.19	1694.45	1708.31	1701.9	1679.5	1679.58	1671.86	1651.64	1639.8	1625.75	1618.24	1595.28	1590.83	1566.26	1567.84	1536.77	1529.67	1510.06	1503.19	1475.21
	444	1546.95	1581.15	1594.5	1622.05	1648.16	1655.26	1672.74	1678.88	1689.83	1695.25	1682.38	1697.87	1683.22	1696.99	1690.62	1668.37	1668.45	1660.78	1640.69	1628.94	1614.98	1607.52	1584.71	1580.29	1555.88	1557.45	1526.58	1519.54	1500.06	1493.23	1465.44
	445	1549.34	1583.6	1596.96	1624.56	1650.71	1657.82	1675.33	1681.47	1692.45	1697.87	1684.98	1700.49	1685.82	1699.61	1693.23	1670.95	1671.03	1663.35	1643.23	1631.46	1617.48	1610.01	1587.16	1582.73	1558.29	1559.86	1528.95	1521.89	1502.38	1495.54	1467.7
	446	1553.77	1588.12	1601.52	1629.2	1655.42	1662.55	1680.11	1686.27	1697.28	1702.72	1689.79	1705.35	1690.64	1704.46	1698.07	1675.72	1675.81	1668.1	1647.92	1636.11	1622.09	1614.6	1591.69	1587.25	1562.74	1564.32	1533.31	1526.23	1506.67	1499.81	1471.89
	447	1553.99	1588.35	1601.76	1629.44	1655.66	1662.79	1680.36	1686.52	1697.53	1702.96	1690.04	1705.6	1690.88	1704.71	1698.32	1675.96	1676.05	1668.34	1648.16	1636.35	1622.33	1614.84	1591.92	1587.48	1562.96	1564.54	1533.53	1526.45	1506.89	1500.03	1472.11
	448	1544.05	1578.18	1591.51	1619.01	1645.07	1652.15	1669.6	1675.73	1686.66	1692.07	1679.22	1694.68	1680.06	1693.8	1687.45	1665.24	1665.33	1657.66	1637.62	1625.88	1611.95	1604.51	1581.74	1577.32	1552.96	1554.53	1523.72	1516.69	1497.24	1490.43	1462.69
	449	1537.6	1571.59	1584.86	1612.25	1638.2	1645.25	1662.63	1668.73	1679.62	1685	1672.21	1687.6	1673.05	1686.73	1680.4	1658.28	1658.37	1650.74	1630.77	1619.09	1605.22	1597.8	1575.13	1570.73	1546.48	1548.04	1517.36	1510.35	1490.99	1484.2	1456.58
	450	1495.9	1528.98	1541.88	1568.53	1593.77	1600.64	1617.54	1623.48	1634.07	1639.31	1626.86	1641.84	1627.68	1640.99	1634.83	1613.32	1613.4	1605.98	1586.55	1575.18	1561.69	1554.48	1532.42	1528.14	1504.54	1506.06	1476.21	1469.39	1450.56	1443.96	1417.08
	451	1470.2	1502.71	1515.39	1541.58	1566.39	1573.14	1589.75	1595.58	1606	1611.14	1598.91	1613.63	1599.71	1612.79	1606.74	1585.6	1585.68	1578.38	1559.29	1548.12	1534.85	1527.77	1506.09	1501.89	1478.69	1480.18	1450.85	1444.15	1425.64	1419.15	1392.73
	452	1448.03	1480.04	1492.53	1518.33	1542.76	1549.41	1565.77	1571.52	1581.77	1586.84	1574.8	1589.29	1575.58	1588.47	1582.51	1561.68	1561.76	1554.58	1535.78	1524.77	1511.71	1504.73	1483.37	1479.23	1456.39	1457.86	1428.96	1422.37	1404.13	1397.74	1371.73
	453	1419.85	1451.24	1463.49	1488.79	1512.74	1519.26	1535.31	1540.94	1550.99	1555.96	1544.15	1558.37	1544.92	1557.56	1551.72	1531.29	1531.37	1524.33	1505.89	1495.1	1482.29	1475.45	1454.51	1450.45	1428.05	1429.49	1401.16	1394.69	1376.81	1370.55	1345.03
	454	1390.14	1420.88	1432.87	1457.63	1481.09	1487.47	1503.18	1508.7	1518.54	1523.41	1511.84	1525.76	1512.6	1524.97	1519.25	1499.25	1499.33	1492.43	1474.38	1463.82	1451.27	1444.57	1424.07	1420.1	1398.17	1399.58	1371.84	1365.51	1348	1341.87	1316.89
	455	1350.34	1380.19	1391.84	1415.9	1438.68	1444.88	1460.14	1465.5	1475.06	1479.79	1468.56	1482.07	1469.29	1481.31	1475.75	1456.33	1456.4	1449.7	1432.17	1421.91	1409.72	1403.21	1383.3	1379.44	1358.13	1359.51	1332.56	1326.41	1309.41	1303.45	1279.18
	456	1299.47	1328.2	1339.41	1362.56	1384.48	1390.45	1405.13	1410.29	1419.49	1424.04	1413.23	1426.24	1413.94	1425.5	1420.15	1401.46	1401.53	1395.09	1378.21	1368.34	1356.61	1350.35	1331.18	1327.47	1306.97	1308.29	1282.36	1276.44	1260.08	1254.34	1230.99
	457	1270.88	1298.97	1309.94	1332.58	1354.02	1359.86	1374.22	1379.26	1388.26	1392.71	1382.14	1394.86	1382.83	1394.14	1388.91	1370.63	1370.7	1364.39	1347.89	1338.23	1326.76	1320.64	1301.9	1298.26	1278.21	1279.51	1254.15	1248.36	1232.35	1226.74	1203.91
	458	1240.1	1267.52	1278.22	1300.31	1321.24	1326.93	1340.94	1345.86	1354.65	1358.99	1348.67	1361.09	1349.34	1360.38	1355.28	1337.44	1337.51	1331.36	1315.25	1305.83	1294.64	1288.66	1270.37	1266.83	1247.26	1248.52	1223.78	1218.13	1202.51	1197.04	1174.76
	459	1196.41	1222.86	1233.18	1254.5	1274.68	1280.18	1293.7	1298.44	1306.92	1311.1	1301.15	1313.13	1301.8	1312.45	1307.52	1290.32	1290.38	1284.45	1268.91	1259.82	1249.02	1243.26	1225.61	1222.19	1203.32	1204.53	1180.66	1175.21	1160.14	1154.86	1133.37
	460	1165.19	1190.95	1201	1221.76	1241.42	1246.77	1259.94	1264.56	1272.81	1276.89	1267.19	1278.86	1267.83	1278.2	1273.4	1256.64	1256.71	1250.93	1235.8	1226.94	1216.43	1210.81	1193.63	1190.3	1171.91	1173.1	1149.85	1144.54	1129.87	1124.73	1103.79
	[nm]	C11	X35
[nm]		470	471	472	473	474	475	476	477	478	479	480	481	482	483	484	485	486	487	488	489	490	491	492	493	494	495	496	497	498	499	500
	430	45326.3	46998.3	48217	49906.8	51241	52173.7	53018.4	53678.5	54537.2	55077.7	54780.3	55436	55210.2	55380.3	55276.2	54769.9	54480.1	54223.6	53486.3	53012.5	52499.2	51970.1	51218	50866.8	50075.8	49740.6	48731.5	48425	47569.9	47179.3	46368.8
	431	45420.7	47096.2	48317.5	50010.8	51347.8	52282.4	53129	53790.4	54650.8	55192.5	54894.5	55551.5	55325.3	55495.7	55391.4	54884	54593.7	54336.6	53597.8	53123	52608.6	52078.5	51324.8	50972.8	50180.2	49844.3	48833.1	48526	47669	47277.6	46465.5
	432	46044.4	47742.9	48981	50697.5	52052.9	53000.3	53858.5	54529	55401.3	55950.3	55648.3	56314.3	56085	56257.7	56152	55637.7	55343.3	55082.7	54333.8	53852.4	53331	52793.6	52029.6	51672.7	50869.2	50528.7	49503.7	49192.3	48323.6	47926.8	47103.5
	433	46555.9	48273.3	49525.1	51260.7	52631.1	53589.1	54456.8	55134.7	56016.7	56571.9	56266.5	56939.9	56708	56882.7	56775.8	56255.7	55958.1	55694.6	54937.4	54450.6	53923.5	53380	52607.5	52246.7	51434.3	51090	50053.6	49738.8	48860.4	48459.2	47626.8
	434	47415.9	49165	50439.9	52207.6	53603.3	54579	55462.7	56153.2	57051.5	57616.9	57305.8	57991.7	57755.6	57933.4	57824.5	57294.9	56991.8	56723.4	55952.2	55456.5	54919.6	54366.1	53579.3	53211.8	52384.4	52033.8	50978.2	50657.6	49762.9	49354.4	48506.6
	435	48161.9	49938.5	51233.4	53029	54446.6	55437.6	56335.3	57036.6	57949	58523.3	58207.4	58904	58664.2	58844.9	58734.2	58196.2	57888.4	57615.8	56832.4	56328.9	55783.6	55221.4	54422.2	54049	53208.6	52852.4	51780.2	51454.5	50545.8	50130.8	49269.7
	436	48505.7	50295	51599.3	53407.6	54835.4	55833.5	56737.5	57443.9	58362.8	58941.2	58623	59324.6	59083	59265	59153.6	58611.8	58301.7	58027.2	57238.2	56731.1	56181.9	55615.7	54810.8	54434.9	53588.5	53229.8	52149.9	51821.9	50906.7	50488.8	49621.5
	437	49254.4	51071.3	52395.7	54231.9	55681.7	56695.2	57613.2	58330.5	59263.6	59850.9	59527.8	60240.3	59995	60179.7	60066.6	59516.4	59201.6	58922.8	58121.7	57606.7	57049	56474.1	55656.8	55275.1	54415.6	54051.3	52954.8	52621.8	51692.4	51268	50387.4
	438	50293.8	52149	53501.3	55376.3	56856.7	57891.6	58829	59561.4	60514.1	61113.9	60783.9	61511.4	61260.9	61449.6	61334.1	60772.3	60450.8	60166.2	59348.1	58822.3	58252.8	57665.8	56831.2	56441.5	55563.8	55191.9	54072.2	53732.2	52783.2	52349.9	51450.6
	439	51577.4	53480	54866.8	56789.7	58307.9	59369.2	60330.5	61081.5	62058.6	62673.7	62335.3	63081.4	62824.5	63018	62899.5	62323.4	61993.7	61701.8	60862.9	60323.7	59739.6	59137.6	58281.7	57882	56982	56600.6	55452.3	55103.6	54130.4	53686	52763.8
	440	51869.6	53783	55177.7	57111.4	58638.2	59705.5	60672.3	61427.6	62410.3	63028.8	62688.5	63438.8	63180.5	63375.1	63255.9	62676.5	62344.9	62051.4	61207.7	60665.4	60078.1	59472.6	58611.9	58210	57304.8	56921.3	55766.5	55415.8	54437.1	53990.1	53062.7
	441	52762.8	54709.2	56127.9	58094.9	59648	60733.7	61717.1	62485.4	63485	64114.2	63768	64531.3	64268.5	64466.4	64345.2	63755.8	63418.6	63120	62261.7	61710.1	61112.7	60496.8	59621.3	59212.4	58291.7	57901.5	56726.8	56370.1	55374.5	54919.9	53976.5
	442	53629.8	55608.1	57050.1	59049.5	60628.1	61731.6	62731.1	63512.1	64528.1	65167.6	64815.8	65591.6	65324.4	65525.6	65402.5	64803.4	64460.6	64157.1	63284.7	62724.1	62116.8	61490.8	60600.9	60185.3	59249.4	58852.8	57658.9	57296.3	56284.4	55822.3	54863.4
	443	53906.7	55895.2	57344.7	59354.4	60941.1	62050.4	63055.1	63840.1	64861.3	65504.1	65150.5	65930.3	65661.8	65864	65740.2	65138	64793.4	64488.4	63611.5	63048	62437.6	61808.3	60913.8	60496.1	59555.4	59156.7	57956.6	57592.1	56575	56110.5	55146.7
	444	54382.6	56388.6	57850.9	59878.3	61479.1	62598.1	63611.7	64403.6	65433.9	66082.3	65725.6	66512.2	66241.4	66445.4	66320.5	65713	65365.4	65057.6	64173	63604.5	62988.7	62353.9	61451.5	61030.1	60081.1	59678.9	58468.2	58100.5	57074.4	56605.8	55633.5
	445	55299.5	57339.4	58826.3	60887.9	62515.6	63653.5	64684.2	65489.5	66537.1	67196.5	66833.7	67633.6	67358.2	67565.7	67438.7	66821	66467.5	66154.5	65255	64676.9	64050.7	63405.2	62487.6	62059.1	61094.1	60685.1	59454	59080.1	58036.7	57560.2	56571.5
	446	55961	58025.3	59529.9	61616.2	63263.4	64414.9	65457.9	66272.9	67333	68000.3	67633.2	68442.7	68163.9	68373.9	68245.4	67620.3	67262.5	66945.8	66035.6	65450.6	64816.9	64163.7	63235.1	62801.4	61824.9	61411	60165.2	59786.8	58731	58248.7	57248.2
	447	56751.1	58844.6	60370.5	62486.2	64156.7	65324.5	66382.2	67208.6	68283.7	68960.5	68588.1	69409.1	69126.4	69339.3	69209	68575.1	68212.3	67891.1	66968	66374.7	65732.1	65069.6	64128	63688.1	62697.8	62278.2	61014.7	60631	59560.2	59071.2	58056.5
	448	57185.1	59294.5	60832.1	62964	64647.3	65824	66889.8	67722.5	68805.9	69487.8	69112.6	69939.8	69655	69869.5	69738.2	69099.4	68733.8	68410.2	67480.1	66882.2	66234.7	65567.2	64618.3	64175.1	63177.3	62754.4	61481.3	61094.6	60015.6	59522.9	58500.4
	449	57919.7	60056.3	61613.6	63772.9	65477.8	66669.6	67749.1	68592.5	69689.8	70380.4	70000.5	70838.3	70549.8	70767.1	70634.1	69987.1	69616.8	69289.1	68347	67741.5	67085.6	66409.5	65448.4	64999.6	63988.9	63560.5	62271.1	61879.5	60786.7	60287.6	59252
	450	57496.3	59617.3	61163.2	63306.7	64999.2	66182.2	67253.9	68091.1	69180.4	69866	69488.8	70320.5	70034.1	70249.8	70117.8	69475.5	69108	68782.6	67847.4	67246.3	66595.2	65924.1	64970	64524.4	63521.1	63095.9	61815.9	61427.1	60342.3	59846.9	58818.8
	451	57333	59447.9	60989.4	63126.9	64814.5	65994.2	67062.8	67897.7	68983.8	69667.5	69291.4	70120.7	69835.2	70050.3	69918.6	69278.1	68911.6	68587.2	67654.6	67055.2	66406	65736.8	64785.5	64341.1	63340.7	62916.7	61640.3	61252.6	60170.9	59676.9	58651.7
	452	57620.3	59745.8	61295.1	63443.2	65139.3	66325	67398.9	68238	69329.6	70016.6	69638.6	70472.1	70185.1	70401.3	70269	69625.3	69257	68930.9	67993.7	67391.3	66738.8	66066.2	65110.1	64663.6	63658.1	63232	61949.2	61559.6	60472.4	59975.9	58945.7
	453	57457.5	59577	61121.9	63263.9	64955.2	66137.5	67208.4	68045.1	69133.6	69818.8	69441.8	70273	69986.8	70202.4	70070.4	69428.6	69061.3	68736.1	67801.5	67200.8	66550.2	65879.5	64926.1	64480.8	63478.2	63053.3	61774.1	61385.6	60301.5	59806.4	58779.1
	454	57398	59515.3	61058.6	63198.5	64888	66069.1	67138.9	67974.7	69062.1	69746.5	69370	70200.3	69914.4	70129.7	69997.9	69356.7	68989.8	68665	67731.4	67131.3	66481.4	65811.4	64859	64414.1	63412.5	62988.1	61710.2	61322.1	60239.2	59744.6	58718.3
	455	57226.7	59337.7	60876.4	63009.9	64694.4	65871.9	66938.5	67771.9	68856	69538.4	69162.9	69990.8	69705.7	69920.4	69789	69149.7	68783.9	68460.1	67529.2	66931	66283	65615	64665.4	64221.9	63223.3	62800.1	61526.1	61139.1	60059.4	59566.2	58543
	456	56059.9	58127.9	59635.2	61725.2	63375.3	64528.8	65573.7	66390.1	67452.1	68120.6	67752.8	68563.7	68284.5	68494.8	68366.1	67739.8	67381.5	67064.2	66152.4	65566.3	64931.5	64277.1	63346.9	62912.5	61934.2	61519.6	60271.6	59892.5	58834.8	58351.7	57349.4
	457	55948.6	58012.4	59516.7	61602.6	63249.4	64400.7	65443.4	66258.2	67318.1	67985.2	67618.2	68427.5	68148.9	68358.8	68230.3	67605.3	67247.6	66931	66021	65436.1	64802.5	64149.4	63221.1	62787.5	61811.2	61397.4	60151.9	59773.6	58717.9	58235.8	57235.5
	458	55688	57742.2	59239.5	61315.6	62954.8	64100.7	65138.6	65949.6	67004.5	67668.6	67303.2	68108.8	67831.4	68040.4	67912.5	67290.4	66934.4	66619.2	65713.4	65131.3	64500.7	63850.6	62926.6	62495	61523.3	61111.5	59871.7	59495.1	58444.4	57964.6	56968.9
	459	54973.3	57001.1	58479.2	60528.7	62146.9	63278	64302.6	65103.2	66144.6	66800.1	66439.5	67234.7	66960.9	67167.1	67040.9	66426.8	66075.4	65764.3	64870.1	64295.4	63672.9	63031.2	62119	61693	60733.7	60327.1	59103.3	58731.6	57694.4	57220.7	56237.7
	460	54628.4	56643.6	58112.4	60149	61757	62881.1	63899.2	64694.8	65729.7	66381.1	66022.7	66812.9	66540.8	66745.8	66620.3	66010.1	65660.9	65351.7	64463.1	63892	63273.5	62635.8	61729.3	61306	60352.7	59948.7	58732.5	58363.2	57332.4	56861.7	55885
	[nm]	C12	X36
[nm]		470	471	472	473	474	475	476	477	478	479	480	481	482	483	484	485	486	487	488	489	490	491	492	493	494	495	496	497	498	499	500
	430	42461.1	43900.2	44913.3	46368.6	47490.6	48235.6	48926.6	49468.9	50157.5	50568.2	50298.7	50785.5	50554.4	50598.6	50567.5	50016.6	49700.6	49529.5	48758.1	48329.9	47854.1	47371.6	46731.5	46364	45650.7	45340.7	44441.9	44140.6	43367.6	42978.4	42230.7
	431	43269.4	44735.9	45768.3	47251.3	48394.7	49153.9	49858	50410.7	51112.4	51530.8	51256.2	51752.3	51516.8	51561.8	51530.2	50968.8	50646.8	50472.4	49686.4	49250	48765.1	48273.5	47621.1	47246.7	46519.8	46203.9	45287.9	44980.9	44193.2	43796.6	43034.6
	432	43789.8	45273.9	46318.7	47819.6	48976.7	49745	50457.6	51017	51727.1	52150.6	51872.7	52374.7	52136.4	52181.9	52149.9	51581.8	51255.9	51079.4	50283.9	49842.3	49351.6	48854	48193.8	47814.9	47079.2	46759.5	45832.6	45521.9	44724.7	44323.3	43552.2
	433	44347.5	45850.6	46908.7	48428.6	49600.5	50378.6	51100.3	51666.7	52385.9	52814.8	52533.3	53041.7	52800.4	52846.5	52814.1	52238.7	51908.7	51729.9	50924.3	50477.1	49980.1	49476.3	48807.6	48423.9	47678.8	47355.1	46416.3	46101.7	45294.3	44887.8	44106.9
	434	45193.1	46724.7	47803	49352	50546.2	51339.1	52074.5	52651.8	53384.7	53821.7	53534.9	54053	53807.1	53854.1	53821.1	53234.7	52898.4	52716.2	51895.3	51439.5	50933	50419.6	49738.2	49347.1	48587.9	48257.9	47301.3	46980.6	46157.9	45743.6	44947.8
	435	46001.8	47560.9	48658.5	50235.1	51450.7	52257.8	53006.4	53594	54340	54784.9	54492.9	55020.3	54770	54817.8	54784.2	54187.4	53845	53659.6	52823.9	52360	51844.5	51321.8	50628.3	50230.2	49457.4	49121.5	48147.8	47821.4	46983.9	46562.2	45752.2
	436	46479.1	48054.3	49163.3	50756.3	51984.5	52800	53556.4	54150.1	54903.8	55353.3	55058.3	55591.1	55338.2	55386.6	55352.6	54749.6	54403.6	54216.3	53372	52903.2	52382.4	51854.3	51153.5	50751.3	49970.5	49631.2	48647.3	48317.5	47471.4	47045.3	46226.8
	437	47140.8	48738.4	49863.2	51478.9	52724.6	53551.7	54318.8	54921	55685.4	56141.3	55842.1	56382.6	56126	56175.1	56140.6	55529	55178.1	54988.1	54131.8	53656.4	53128.1	52592.5	51881.8	51473.8	50681.9	50337.7	49339.9	49005.4	48147.2	47715.1	46884.9
	438	48131.9	49763.2	50911.6	52561.3	53833.2	54677.7	55460.9	56075.7	56856.3	57321.7	57016.3	57568.1	57306.1	57356.2	57321	56696.5	56338.3	56144.3	55270	54784.5	54245.2	53698.3	52972.6	52556.1	51747.5	51396.1	50377.3	50035.8	49159.5	48718.3	47870.7
	439	49483.9	51161	52341.7	54037.7	55345.3	56213.5	57018.8	57650.9	58453.3	58931.9	58617.8	59185.1	58915.8	58967.3	58931.1	58289.1	57920.8	57721.4	56822.5	56323.4	55768.9	55206.7	54460.6	54032.4	53201.1	52839.8	51792.3	51441.2	50540.4	50086.8	49215.4
	440	49768.9	51455.7	52643.2	54348.9	55664.1	56537.3	57347.2	57982.9	58790	59271.3	58955.4	59526	59255.1	59306.9	59270.6	58624.8	58254.4	58053.8	57149.7	56647.8	56090.1	55524.6	54774.3	54343.6	53507.5	53144.1	52090.6	51737.5	50831.5	50375.3	49498.8
	441	50786	52507.3	53719	55459.6	56801.6	57692.7	58519.1	59167.8	59991.4	60482.6	60160.2	60742.5	60466.1	60518.9	60481.8	59822.9	59444.9	59240.2	58317.7	57805.5	57236.4	56659.3	55893.7	55454.2	54601	54230.2	53155.2	52794.8	51870.3	51404.7	50510.4
	442	51507.3	53253	54482	56247.3	57608.4	58512.1	59350.3	60008.2	60843.5	61341.6	61014.7	61605.2	61324.9	61378.5	61340.8	60672.6	60289.2	60081.6	59146	58626.5	58049.3	57464.1	56687.5	56241.8	55376.5	55000.4	53910.1	53544.7	52607	52134.8	51227.8
	443	51992.7	53754.9	54995.4	56777.4	58151.3	59063.5	59909.6	60573.7	61416.9	61919.7	61589.7	62185.7	61902.8	61956.9	61918.9	61244.3	60857.4	60647.8	59703.3	59178.9	58596.3	58005.6	57221.7	56771.8	55898.3	55518.7	54418.2	54049.3	53102.7	52626.1	51710.6
	444	52426.6	54203.5	55454.4	57251.2	58636.6	59556.4	60409.6	61079.2	61929.4	62436.4	62103.7	62704.7	62419.4	62474	62435.7	61755.5	61365.3	61153.9	60201.6	59672.8	59085.4	58489.7	57699.3	57245.6	56364.8	55982.1	54872.3	54500.3	53545.9	53065.3	52142.1
	445	53332.9	55140.4	56412.9	58240.9	59650.2	60585.9	61453.8	62135	62999.9	63515.7	63177.2	63788.6	63498.4	63553.9	63514.9	62822.9	62426	62211	61242.2	60704.3	60106.7	59500.7	58696.7	58235.1	57339.2	56949.8	55820.8	55442.4	54471.5	53982.6	53043.5
	446	54020.1	55851	57139.9	58991.4	60418.8	61366.6	62245.7	62935.7	63811.7	64334.2	63991.3	64610.6	64316.6	64372.8	64333.4	63632.5	63230.4	63012.7	62031.4	61486.6	60881.3	60267.5	59453	58985.6	58078	57683.6	56540.2	56156.9	55173.4	54678.2	53727
	447	54924.5	56786	58096.4	59978.9	61430.3	62393.9	63287.7	63989.3	64880	65411.2	65062.6	65692.3	65393.3	65450.5	65410.4	64697.8	64289	64067.6	63069.9	62515.9	61900.5	61276.4	60448.3	59973	59050.3	58649.3	57486.7	57097	56097.1	55593.6	54626.4
	448	55268.1	57141.2	58459.9	60354.1	61814.6	62784.3	63683.7	64389.6	65285.9	65820.4	65469.6	66103.2	65802.4	65859.9	65819.6	65102.5	64691.1	64468.4	63464.4	62907	62287.7	61659.7	60826.5	60348.2	59419.7	59016.2	57846.3	57454.2	56448	55941.4	54968.1
	449	56082	57982.7	59320.8	61242.9	62724.9	63708.9	64621.5	65337.9	66247.3	66789.7	66433.8	67076.7	66771.5	66829.8	66788.9	66061.2	65643.8	65417.8	64399	63833.4	63205	62567.8	61722.2	61236.9	60294.8	59885.3	58698.2	58300.3	57279.3	56765.2	55777.6
	450	55653.1	57539.3	58867.2	60774.6	62245.3	63221.7	64127.4	64838.2	65740.8	66279	65925.8	66563.8	66260.9	66318.8	66278.2	65556.1	65141.9	64917.6	63906.6	63345.3	62721.7	62089.3	61250.3	60768.7	59833.7	59427.4	58249.4	57854.5	56841.3	56331.2	55351.1
	451	55556.2	57439.2	58764.7	60668.8	62136.9	63111.6	64015.7	64725.4	65626.3	66163.6	65811	66447.9	66145.5	66203.3	66162.8	65441.9	65028.4	64804.5	63795.3	63235	62612.5	61981.2	61143.6	60662.9	59729.5	59323.9	58147.9	57753.7	56742.3	56233.1	55254.8
	452	55792.5	57683.4	59014.6	60926.9	62401.2	63380.1	64288	65000.6	65905.4	66445	66090.9	66730.5	66426.8	66484.9	66444.1	65720.3	65305	65080.1	64066.6	63503.9	62878.8	62244.8	61403.7	60920.9	59983.6	59576.2	58395.2	57999.4	56983.7	56472.2	55489.8
	453	55664	57550.6	58878.7	60786.5	62257.4	63234.1	64139.9	64850.9	65753.6	66291.9	65938.6	66576.8	66273.8	66331.8	66291.1	65568.9	65154.6	64930.2	63919.1	63357.7	62733.9	62101.5	61262.2	60780.6	59845.4	59439	58260.7	57865.8	56852.4	56342.2	55361.9
	454	55598.5	57482.9	58809.4	60715	62184.2	63159.7	64064.4	64774.6	65676.2	66213.9	65861	66498.4	66195.8	66253.7	66213.1	65491.7	65077.9	64853.8	63843.9	63283.1	62660.1	62028.4	61190.1	60709	59775	59369.1	58192.2	57797.7	56785.5	56275.9	55296.8
	455	55466.7	57346.5	58669.9	60571	62036.7	63009.9	63912.5	64621	65520.5	66056.9	65704.9	66340.7	66038.9	66096.6	66056.1	65336.4	64923.6	64700	63692.4	63133	62511.5	61881.3	61045	60565.1	59633.2	59228.3	58054.2	57660.6	56650.8	56142.4	55165.7
	456	54282.5	56122.3	57417.4	59277.9	60712.3	61664.7	62548	63241.4	64121.7	64646.7	64302.2	64924.5	64629	64685.5	64645.9	63941.6	63537.6	63318.8	62332.7	61785.2	61177	60560.2	59741.8	59272.1	58360.1	57963.8	56814.8	56429.6	55441.4	54943.8	53987.9
	457	54104.4	55938.1	57229	59083.4	60513.1	61462.4	62342.8	63033.9	63911.3	64434.5	64091.2	64711.4	64417	64473.3	64433.8	63731.8	63329.1	63111	62128.2	61582.5	60976.2	60361.5	59545.8	59077.6	58168.7	57773.7	56628.4	56244.5	55259.5	54763.6	53810.8
	458	53816.3	55640.3	56924.3	58768.8	60190.9	61135.1	62010.9	62698.3	63571	64091.4	63749.9	64366.9	64074	64130	64090.7	63392.4	62991.9	62775	61797.4	61254.6	60651.6	60040.1	59228.7	58763	57858.9	57466	56326.8	55945	54965.3	54472	53524.3
	459	52953.4	54748.1	56011.5	57826.5	59225.7	60154.8	61016.5	61692.9	62551.7	63063.8	62727.7	63334.8	63046.6	63101.7	63063	62375.9	61981.8	61768.4	60806.5	60272.4	59679	59077.4	58279	57820.8	56931.2	56544.6	55423.7	55047.9	54083.9	53598.5	52666
	460	52601.6	54384.4	55639.4	57442.3	58832.3	59755.2	60611.2	61283.1	62136.1	62644.8	62311	62914	62627.7	62682.5	62644	61961.5	61570	61358	60402.5	59872	59282.6	58684.9	57891.8	57436.6	56552.9	56168.9	55055.5	54682.2	53724.6	53242.4	52316.1
	[nm]	D01	X37
[nm]		470	471	472	473	474	475	476	477	478	479	480	481	482	483	484	485	486	487	488	489	490	491	492	493	494	495	496	497	498	499	500
	430	35107.5	36324.9	37166.4	38362.4	39287.6	39890.4	40451.4	40912.3	41467.1	41826.3	41601.7	42022.4	41877.6	41937.6	41870.1	41504.2	41271.4	41039	40512.2	40182.5	39767.1	39330.7	38790	38505.8	38002.8	37693.7	36902.7	36700.3	35995.6	35710.6	35076.6
	431	35257.6	36480.1	37325.2	38526.4	39455.5	40060.9	40624.3	41087.1	41644.3	42005.1	41779.5	42202	42056.6	42116.8	42049.1	41681.5	41447.7	41214.4	40685.4	40354.3	39937.1	39498.8	38955.8	38670.3	38165.2	37854.8	37060.4	36857.2	36149.4	35863.2	35226.5
	432	35731.2	36970.1	37826.5	39043.9	39985.4	40599	41170	41639	42203.7	42569.3	42340.7	42768.9	42621.5	42682.6	42613.9	42241.4	42004.5	41768	41231.9	40896.3	40473.5	40029.3	39479.1	39189.8	38677.9	38363.3	37558.2	37352.2	36635	36344.9	35699.7
	433	36211	37466.6	38334.5	39568.2	40522.4	41144.2	41722.9	42198.2	42770.5	43141	42909.3	43343.3	43193.9	43255.8	43186.2	42808.7	42568.6	42328.9	41785.6	41445.5	41017.1	40566.9	40009.3	39716.1	39197.3	38878.5	38062.6	37853.9	37127	36833	36179.1
	434	36924	38204.3	39089.3	40347.3	41320.3	41954.3	42544.3	43029	43612.6	43990.4	43754.1	44196.6	44044.3	44107.4	44036.4	43651.6	43406.7	43162.3	42608.3	42261.5	41824.6	41365.6	40797	40498	39969.1	39643.9	38812	38599.2	37857.9	37558.2	36891.4
	435	37637.9	38943	39845.1	41127.4	42119.2	42765.5	43367	43861	44455.9	44841	44600.1	45051.2	44895.9	44960.3	44887.9	44495.6	44246	43996.9	43432.2	43078.7	42633.3	42165.4	41585.8	41281.1	40741.9	40410.5	39562.4	39345.5	38590	38284.4	37604.7
	436	38016.8	39335	40246.2	41541.4	42543.2	43196	43803.5	44302.5	44903.4	45292.3	45049.1	45504.7	45347.9	45412.8	45339.8	44943.5	44691.4	44439.8	43869.3	43512.3	43062.5	42589.9	42004.4	41696.6	41152	40817.2	39960.7	39741.6	38978.4	38669.8	37983.3
	437	38582.8	39920.6	40845.4	42159.9	43176.6	43839.1	44455.7	44962.1	45571.9	45966.7	45719.8	46182.2	46023	46089	46014.8	45612.6	45356.8	45101.4	44522.5	44160.2	43703.6	43224	42629.8	42317.4	41764.7	41425	40555.6	40333.3	39558.7	39245.5	38548.8
	438	39381.5	40747	41691	43032.7	44070.4	44746.6	45376	45892.9	46515.3	46918.3	46666.3	47138.2	46975.8	47043.1	46967.4	46556.9	46295.8	46035.1	45444.2	45074.4	44608.4	44118.8	43512.3	43193.5	42629.3	42282.5	41395.2	41168.2	40377.7	40058	39346.8
	439	40510.4	41915.1	42886.1	44266.2	45333.7	46029.3	46676.7	47208.5	47848.7	48263.2	48004	48489.5	48322.4	48391.6	48313.8	47891.5	47622.8	47354.7	46746.9	46366.4	45887.1	45383.5	44759.6	44431.6	43851.3	43494.6	42581.8	42348.3	41535.1	41206.2	40474.7
	440	40816.4	42231.7	43210.1	44600.6	45676.2	46377.1	47029.3	47565.1	48210.2	48627.8	48366.6	48855.8	48687.4	48757.2	48678.7	48253.3	47982.6	47712.5	47100	46716.7	46233.7	45726.3	45097.8	44767.3	44182.6	43823.1	42903.5	42668.2	41848.9	41517.5	40780.5
	441	41611.2	43054.1	44051.4	45469.1	46565.6	47280.1	47945.1	48491.3	49149	49574.7	49308.4	49807.1	49635.5	49706.6	49626.6	49192.9	48916.9	48641.5	48017.2	47626.4	47134	46616.7	45975.9	45639	45042.9	44676.5	43738.9	43499.1	42663.8	42326	41574.5
	442	42288.4	43754.7	44768.3	46209	47323.4	48049.5	48725.3	49280.4	49948.8	50381.4	50110.8	50617.6	50443.2	50515.5	50434.2	49993.4	49713	49433.1	48798.6	48401.4	47901	47375.3	46724.1	46381.7	45775.9	45403.5	44450.7	44207	43358.1	43014.7	42251.1
	443	42721	44202.3	45226.3	46681.7	47807.5	48541	49223.7	49784.5	50459.7	50896.8	50623.4	51135.4	50959.2	51032.2	50950.1	50504.8	50221.5	49938.8	49297.7	48896.5	48391	47859.9	47202	46856.1	46244.1	45868	44905.4	44659.2	43801.6	43454.8	42683.3
	444	43094.5	44588.7	45621.7	47089.8	48225.4	48965.4	49654.1	50219.7	50900.9	51341.8	51066	51582.5	51404.7	51478.4	51395.5	50946.3	50660.6	50375.4	49728.7	49324	48814.1	48278.4	47614.7	47265.8	46648.4	46269	45298	45049.6	44184.5	43834.7	43056.5
	445	43941.6	45465.2	46518.5	48015.5	49173.4	49927.9	50630.1	51206.9	51901.4	52351	52069.9	52596.5	52415.2	52490.3	52405.9	51947.8	51656.4	51365.6	50706.3	50293.6	49773.7	49227.4	48550.7	48194.9	47565.4	47178.5	46188.4	45935.2	45053.1	44696.4	43902.8
	446	44528.4	46072.4	47139.7	48656.7	49830.1	50594.7	51306.3	51890.8	52594.5	53050.1	52765.2	53298.9	53115.2	53191.3	53105.7	52641.5	52346.3	52051.6	51383.4	50965.2	50438.3	49884.8	49199.1	48838.5	48200.6	47808.5	46805.3	46548.6	45654.7	45293.2	44489.1
	447	45231.5	46799.9	47884	49425	50617	51393.6	52116.4	52710.1	53425	53887.8	53598.4	54140.5	53953.9	54031.2	53944.3	53472.8	53172.8	52873.5	52194.8	51770	51234.8	50672.5	49975.9	49609.7	48961.8	48563.5	47544.3	47283.6	46375.6	46008.4	45191.6
	448	45610.7	47192.3	48285.5	49839.4	51041.3	51824.5	52553.4	53152.1	53873	54339.6	54047.8	54594.4	54406.2	54484.2	54396.5	53921.1	53618.6	53316.8	52632.4	52204.1	51664.3	51097.3	50394.9	50025.7	49372.3	48970.6	47943	47680.1	46764.5	46394.2	45570.5
	449	46311.1	47916.9	49027	50604.7	51825.1	52620.3	53360.4	53968.3	54700.2	55174	54877.7	55432.7	55241.7	55320.8	55231.8	54749.1	54442	54135.5	53440.6	53005.7	52457.7	51882	51168.8	50793.8	50130.4	49722.6	48679.1	48412.2	47482.6	47106.6	46270.3
	450	45990.1	47584.8	48687.1	50253.9	51465.8	52255.5	52990.5	53594.1	54321	54791.6	54497.3	55048.5	54858.7	54937.3	54849	54369.6	54064.6	53760.2	53070.1	52638.2	52094	51522.3	50814.1	50441.7	49782.9	49377.9	48341.7	48076.6	47153.4	46780	45949.5
	451	45896.7	47488.2	48588.3	50151.9	51361.4	52149.5	52882.9	53485.4	54210.8	54680.3	54386.7	54936.7	54747.4	54825.8	54737.6	54259.2	53954.9	53651.1	52962.4	52531.4	51988.3	51417.8	50711	50339.3	49681.8	49277.7	48243.6	47979	47057.7	46685.1	45856.3
	452	46127.6	47727	48832.7	50404.2	51619.7	52411.8	53148.9	53754.4	54483.4	54955.4	54660.2	55213	55022.8	55101.6	55012.9	54532.1	54226.2	53920.9	53228.8	52795.6	52249.8	51676.4	50966	50592.5	49931.7	49525.5	48486.2	48220.4	47294.4	46919.9	46086.9
	453	46075.6	47673.3	48777.6	50347.4	51561.6	52352.7	53089	53693.8	54422.1	54893.5	54598.6	55150.8	54960.8	55039.5	54951	54470.7	54165.1	53860.2	53168.8	52736.1	52190.9	51618.1	50908.6	50535.5	49875.5	49469.7	48431.6	48166	47241.1	46867	46035
	454	45976.9	47571.1	48673.1	50239.5	51451	52240.5	52975.2	53578.7	54305.4	54775.8	54481.6	55032.6	54843	54921.5	54833.2	54353.9	54049	53744.8	53054.9	52623.1	52079.1	51507.5	50799.5	50427.2	49768.6	49363.7	48327.8	48062.8	47139.8	46766.6	45936.3
	455	45790.2	47377.9	48475.5	50035.5	51242.1	52028.4	52760.1	53361.2	54084.9	54553.4	54260.4	54809.2	54620.3	54698.5	54610.5	54133.2	53829.6	53526.5	52839.5	52409.4	51867.6	51298.4	50593.2	50222.5	49566.5	49163.3	48131.6	47867.6	46948.4	46576.7	45749.8
	456	44853.7	46408.9	47484	49012.2	50194.1	50964.3	51681.1	52269.8	52978.8	53437.7	53150.7	53688.2	53503.2	53579.8	53493.6	53026.1	52728.7	52431.8	51758.8	51337.5	50806.8	50249.2	49558.5	49195.3	48552.7	48157.8	47147.2	46888.6	45988.2	45624.1	44814.1
	457	44667.4	46216.2	47286.8	48808.6	49985.7	50752.6	51466.4	52052.8	52758.7	53215.7	52929.9	53465.3	53281	53357.3	53271.5	52805.9	52509.7	52214.1	51543.8	51124.4	50595.8	50040.5	49352.7	48991	48351.1	47957.8	46951.4	46693.9	45797.3	45434.6	44628
	458	44378.2	45917	46980.7	48492.7	49662.1	50424.1	51133.3	51715.8	52417.2	52871.2	52587.3	53119.1	52936.1	53011.9	52926.6	52464	52169.8	51876	51210.2	50793.4	50268.3	49716.6	49033.2	48673.9	48038.1	47647.3	46647.4	46391.6	45500.8	45140.5	44339.1
	459	43639.7	45152.9	46198.9	47685.7	48835.7	49585	50282.4	50855.2	51544.9	51991.4	51712.2	52235.2	52055.2	52129.7	52045.9	51591	51301.6	51012.8	50358	49948.1	49431.8	48889.2	48217.2	47863.9	47238.7	46854.4	45871.2	45619.6	44743.6	44389.3	43601.3
	460	43306.3	44807.9	45845.9	47321.3	48462.5	49206.1	49898.1	50466.6	51151	51594.1	51317	51836	51657.4	51731.4	51648.2	51196.7	50909.6	50623	49973.2	49566.5	49054	48515.7	47848.8	47498.1	46877.7	46496.4	45520.6	45271	44401.7	44050.1	43268.1
	[nm]	D02	X38
[nm]		470	471	472	473	474	475	476	477	478	479	480	481	482	483	484	485	486	487	488	489	490	491	492	493	494	495	496	497	498	499	500
	430	55785	57847.8	59264.4	61342.3	62893.2	64002.2	65003.6	65785.7	66721.2	67328.2	67069.7	67719.6	67518.3	67607.9	67474.7	66883.7	66448.4	66216.2	65258	64659.5	64022.2	63387.3	62438.1	61976	61140.9	60650.4	59470.5	58995.4	57991.2	57444	56427.7
	431	55860.8	57926.5	59345	61425.6	62978.7	64089.2	65092	65875.2	66811.9	67419.8	67160.9	67811.7	67610.1	67699.8	67566.4	66974.7	66538.7	66306.2	65346.7	64747.4	64109.2	63473.5	62523	62060.3	61224	60732.9	59551.3	59075.6	58070.1	57522.1	56504.4
	432	56668.1	58763.6	60202.6	62313.3	63888.8	65015.4	66032.6	66827.2	67777.4	68394.1	68131.5	68791.6	68587.1	68678.1	68542.8	67942.5	67500.3	67264.4	66291	65683.1	65035.7	64390.7	63426.5	62957.1	62108.8	61610.5	60411.9	59929.3	58909.3	58353.4	57321
	433	57380.8	59502.6	60959.7	63097	64692.3	65833	66863.1	67667.6	68629.8	69254.2	68988.3	69656.8	69449.7	69541.8	69404.8	68797	68349.2	68110.3	67124.7	66509.1	65853.6	65200.5	64224.2	63748.9	62889.9	62385.4	61171.7	60683	59650.1	59087.2	58041.8
	434	58393.9	60553.3	62036.1	64211.1	65834.6	66995.4	68043.7	68862.4	69841.6	70477	70206.4	70886.7	70675.9	70769.7	70630.3	70011.7	69556	69312.9	68310	67683.4	67016.4	66351.8	65358.2	64874.5	64000.3	63486.9	62251.8	61754.4	60703.3	60130.5	59066.7
	435	59347.9	61542.6	63049.6	65260.2	66910.2	68090	69155.4	69987.4	70982.7	71628.4	71353.5	72044.8	71830.6	71925.9	71784.2	71155.6	70692.4	70445.4	69426	68789.2	68111.3	67435.8	66426	65934.4	65046	64524.1	63268.9	62763.4	61695.1	61112.9	60031.7
	436	59805.8	62017.3	63536	65763.6	67426.3	68615.2	69688.8	70527.3	71530.2	72181	71903.9	72600.6	72384.7	72480.8	72338	71704.4	71237.7	70988.8	69961.5	69319.9	68636.7	67956	66938.4	66443	65547.7	65021.9	63756.9	63247.5	62171	61584.3	60494.8
	437	60773.7	63021	64564.3	66827.9	68517.6	69725.7	70816.7	71668.8	72687.9	73349.2	73067.6	73775.6	73556.3	73653.9	73508.8	72865	72390.7	72137.7	71093.8	70441.8	69747.5	69055.9	68021.8	67518.4	66608.6	66074.2	64788.8	64271.2	63177.2	62581.1	61473.9
	438	61926.5	64216.4	65788.9	68095.5	69817.2	71048.3	72160	73028.2	74066.7	74740.5	74453.6	75175	74951.5	75050.9	74903.1	74247.1	73763.8	73506	72442.4	71778	71070.5	70365.7	69312	68799.1	67872	67327.5	66017.7	65490.3	64375.6	63768.1	62639.9
	439	63578.8	65929.8	67544.3	69912.5	71680.1	72944	74085.3	74976.7	76042.9	76734.7	76440.1	77180.8	76951.3	77053.4	76901.6	76228.1	75731.9	75467.3	74375.3	73693.1	72966.8	72243.2	71161.4	70634.8	69683	69124	67779.2	67237.7	66093.3	65469.6	64311.3
	440	63998.2	66364.8	67989.9	70373.7	72152.9	73425.2	74574.1	75471.3	76544.5	77240.9	76944.4	77689.9	77459	77561.7	77408.9	76731	76231.5	75965.2	74865.9	74179.3	73448.1	72719.8	71630.8	71100.7	70142.7	69580	68226.3	67681.2	66529.3	65901.5	64735.5
	441	65196.7	67607.6	69263.2	71691.6	73504.2	74800.3	75970.7	76884.8	77978	78687.5	78385.4	79144.9	78909.6	79014.3	78858.6	78168	77659.2	77387.8	76268	75568.5	74823.7	74081.6	72972.3	72432.3	71456.3	70883	69504	68948.7	67775.2	67135.6	65947.9
	442	66079.6	68523.2	70201.2	72662.4	74499.6	75813.2	76999.5	77925.9	79034	79753.1	79446.9	80216.7	79978.2	80084.3	79926.5	79226.5	78710.8	78435.8	77300.8	76591.8	75836.9	75084.9	73960.5	73413.2	72424	71842.9	70445.3	69882.4	68693	68044.8	66840.9
	443	66663.1	69128.2	70821	73304.1	75157.4	76482.7	77679.4	78614	79731.9	80457.3	80148.4	80925	80684.4	80791.5	80632.3	79926.1	79405.9	79128.4	77983.4	77268.1	76506.6	75747.9	74613.6	74061.4	73063.5	72477.3	71067.3	70499.5	69299.6	68645.6	67431.1
	444	67161.4	69645	71350.4	73852	75719.2	77054.4	78260	79201.7	80327.9	81058.7	80747.5	81529.9	81287.5	81395.4	81235	80523.6	79999.4	79719.9	78566.3	77845.7	77078.5	76314.1	75171.3	74615	73609.6	73019.1	71598.5	71026.5	69817.6	69158.8	67935.2
	445	68332.2	70859.1	72594.3	75139.5	77039.2	78397.7	79624.3	80582.4	81728.2	82471.8	82155.2	82951.2	82704.6	82814.3	82651.2	81927.3	81394	81109.6	79935.9	79202.8	78422.2	77644.5	76481.8	75915.8	74892.8	74292	72846.7	72264.7	71034.7	70364.4	69119.5
	446	69247.1	71807.8	73566.2	76145.5	78070.7	79447.3	80690.4	81661.2	82822.5	83576	83255.1	84061.8	83811.9	83923.1	83757.8	83024.2	82483.8	82195.6	81006.1	80263.2	79472.1	78684	77505.7	76932.2	75895.5	75286.7	73822	73232.2	71985.8	71306.5	70044.9
	447	70262.2	72860.4	74644.6	77261.7	79215.1	80611.9	81873.2	82858.3	84036.5	84801.1	84475.5	85294.1	85040.5	85153.3	84985.6	84241.3	83692.9	83400.5	82193.6	81439.8	80637.1	79837.4	78641.9	78059.9	77008.1	76390.3	74904.2	74305.7	73041	72351.8	71071.7
	448	70755.6	73372.1	75168.8	77804.2	79771.4	81178	82448.2	83440.2	84626.7	85396.6	85068.8	85893	85637.7	85751.3	85582.4	84832.8	84280.6	83986.1	82770.8	82011.7	81203.4	80398.1	79194.2	78608.1	77548.9	76926.7	75430.2	74827.5	73553.9	72859.8	71570.8
	449	71790.7	74445.4	76268.5	78942.5	80938.4	82365.6	83654.3	84660.9	85864.7	86645.9	86313.3	87149.6	86890.5	87005.8	86834.4	86073.9	85513.6	85214.8	83981.7	83211.5	82391.3	81574.3	80352.7	79758.1	78683.4	78052.1	76533.7	75922.2	74630	73925.7	72617.8
	450	71213.6	73847	75655.4	78307.9	80287.8	81703.5	82981.9	83980.3	85174.5	85949.4	85619.5	86449.1	86192	86306.4	86136.4	85382	84826.2	84529.8	83306.6	82542.6	81729	80918.5	79706.8	79117	78050.9	77424.7	75918.5	75311.9	74030.1	73331.5	72034.1
	451	71114	73743.7	75549.5	78198.3	80175.4	81589.2	82865.7	83862.8	85055.3	85829.1	85499.6	86328.1	86071.4	86185.6	86015.8	85262.5	84707.5	84411.5	83190	82427.1	81614.6	80805.3	79595.3	79006.2	77941.7	77316.4	75812.2	75206.5	73926.5	73228.9	71933.3
	452	71458.5	74100.9	75915.5	78577.1	80563.8	81984.4	83267.2	84269.1	85467.4	86244.9	85913.8	86746.3	86488.4	86603.1	86432.5	85675.6	85117.9	84820.4	83593	82826.4	82010	81196.7	79980.9	79389	78319.2	77690.9	76179.5	75570.9	74284.6	73583.6	72281.8
	453	71352.3	73990.8	75802.6	78460.3	80444.1	81862.5	83143.4	84143.8	85340.3	86116.7	85786.1	86617.3	86359.8	86474.4	86304	85548.2	84991.3	84694.3	83468.8	82703.2	81888.1	81076	79862	79271	78202.8	77575.4	76066.2	75458.5	74174.2	73474.2	72174.3
	454	71239.8	73874.2	75683.2	78336.7	80317.3	81733.5	83012.4	84011.2	85205.8	85981	85650.9	86480.8	86223.7	86338.1	86168	85413.4	84857.4	84560.9	83337.2	82572.9	81759.1	80948.3	79736.1	79146	78079.6	77453.2	75946.4	75339.6	74057.3	73358.4	72060.6
	455	71123.3	73753.4	75559.4	78208.6	80185.9	81599.9	82876.6	83873.8	85066.5	85840.4	85510.9	86339.4	86082.7	86196.9	86027.1	85273.7	84718.6	84422.6	83201	82437.9	81625.4	80815.9	79605.7	79016.6	77951.9	77326.5	75822.2	75216.4	73936.2	73238.5	71942.7
	456	69630.4	72205.3	73973.4	76567	78502.9	79887.1	81137.1	82113.3	83280.9	84038.6	83716	84527.2	84275.9	84387.7	84221.4	83483.8	82940.4	82650.6	81454.6	80707.5	79912.1	79119.6	77934.8	77358.1	76315.7	75703.4	74230.7	73637.6	72384.3	71701.2	70432.7
	457	69538.9	72110.4	73876.2	76466.4	78399.7	79782.1	81030.4	82005.4	83171.5	83928.2	83606	84416.1	84165.1	84276.8	84110.8	83374.1	82831.4	82542	81347.5	80601.5	79807	79015.6	77832.4	77256.4	76215.4	75604	74133.1	73540.8	72289.1	71607	70340.1
	458	69367.5	71932.6	73694.1	76277.9	78206.4	79585.4	80830.7	81803.2	82966.5	83721.3	83399.9	84208	83957.6	84069	83903.4	83168.6	82627.2	82338.5	81147	80402.7	79610.3	78820.8	77640.5	77065.9	76027.5	75417.6	73950.4	73359.5	72110.9	71430.5	70166.7
	459	68343.8	70871.1	72606.6	75152.2	77052.3	78411	79637.8	80596.1	81742.1	82485.8	82169.1	82965.3	82718.6	82828.4	82665.2	81941.2	81407.9	81123.4	79949.5	79216.2	78435.5	77657.6	76494.8	75928.7	74905.6	74304.6	72859.1	72277	71046.8	70376.4	69131.2
	460	67997.4	70511.9	72238.6	74771.3	76661.8	78013.5	79234.2	80187.5	81327.8	82067.7	81752.6	82544.8	82299.4	82408.6	82246.2	81525.9	80995.2	80712.2	79544.3	78814.7	78037.9	77264	76107	75543.8	74525.9	73928	72489.8	71910.6	70686.7	70019.6	68780.8
	[nm]	D03	X39
[nm]		470	471	472	473	474	475	476	477	478	479	480	481	482	483	484	485	486	487	488	489	490	491	492	493	494	495	496	497	498	499	500
	430	46533.2	48265.2	49512.1	51223.5	52639.7	53540	54428.6	55052.3	55912.7	56484.2	56183.7	56851.9	56619.2	56776	56691.1	56171.3	55821.4	55601.7	54840.9	54350.3	53823.4	53247	52534.1	52124.4	51436.5	50989.2	50051.2	49657.2	48815.3	48389.9	47531.5
	431	46814.8	48557.2	49811.7	51533.4	52958.2	53864	54757.9	55385.4	56251	56826	56523.6	57195.9	56961.8	57119.5	57034.1	56511.1	56159.1	55938.1	55172.7	54679.1	54149.1	53569.2	52852	52439.8	51747.7	51297.8	50354	49957.7	49110.6	48682.7	47819.1
	432	47391.9	49155.9	50425.8	52168.8	53611.1	54528	55433	56068.3	56944.5	57526.6	57220.5	57901.1	57664	57823.7	57737.3	57207.9	56851.5	56627.8	55852.9	55353.2	54816.7	54229.7	53503.6	53086.3	52385.7	51930.2	50974.8	50573.6	49716.1	49282.9	48408.6
	433	47933.6	49717.7	51002.1	52765	54223.9	55151.3	56066.6	56709.1	57595.3	58184	57874.5	58562.8	58323.1	58484.6	58397.2	57861.7	57501.3	57275	56491.2	55985.9	55443.2	54849.5	54115.1	53693	52984.4	52523.7	51557.4	51151.6	50284.3	49846.2	48961.9
	434	48794.8	50611	51918.5	53713.1	55198.2	56142.2	57074	57728	58630.2	59229.5	58914.4	59615.1	59371	59535.4	59446.5	58901.3	58534.5	58304.1	57506.3	56991.8	56439.4	55835	55087.4	54657.8	53936.5	53467.5	52483.8	52070.7	51187.8	50741.8	49841.7
	435	49638.4	51485.9	52816.1	54641.6	56152.4	57112.7	58060.6	58726	59643.7	60253.4	59932.8	60645.6	60397.4	60564.6	60474.1	59919.6	59546.3	59312	58500.4	57977	57415	56800.2	56039.7	55602.7	54868.8	54391.7	53391.1	52970.8	52072.7	51619	50703.3
	436	50045.5	51908.2	53249.3	55089.8	56613	57581.2	58536.9	59207.7	60133	60747.6	60424.4	61143.1	60892.8	61061.4	60970.2	60411.1	60034.8	59798.5	58980.2	58452.6	57886	57266.1	56499.4	56058.8	55318.9	54837.9	53829.1	53405.3	52499.9	52042.4	51119.2
	437	50805	52695.9	54057.3	55925.8	57472.1	58455	59425.2	60106.1	61045.5	61669.4	61341.4	62070.9	61816.8	61988	61895.4	61327.8	60945.8	60705.9	59875.2	59339.6	58764.4	58135.1	57356.8	56909.4	56158.4	55670.1	54645.9	54215.7	53296.5	52832.1	51894.9
	438	51879.7	53810.6	55200.8	57108.8	58687.8	59691.5	60682.2	61377.6	62336.8	62974	62638.9	63383.9	63124.4	63299.3	63204.7	62625.1	62235	61990.1	61141.8	60594.8	60007.5	59364.9	58570	58113.2	57346.3	56847.7	55801.8	55362.6	54423.9	53949.7	52992.6
	439	53251.3	55233.3	56660.3	58618.7	60239.4	61269.7	62286.6	63000.3	63984.9	64638.9	64295	65059.7	64793.4	64972.8	64875.7	64280.8	63880.4	63629	62758.3	62196.9	61594	60934.4	60118.6	59649.7	58862.5	58350.6	57277.2	56826.3	55862.8	55376.1	54393.7
	440	53519.1	55511.1	56945.3	58913.6	60542.4	61577.9	62599.9	63317.2	64306.7	64964.1	64618.4	65387	65119.3	65299.6	65202.1	64604.2	64201.7	63949.1	63074	62509.8	61903.8	61240.9	60421	59949.7	59158.6	58644.2	57565.3	57112.1	56143.8	55654.6	54667.3
	441	54520.4	56549.7	58010.6	60015.8	61675.1	62729.9	63771	64501.8	65509.8	66179.4	65827.3	66610.3	66337.6	66521.3	66421.9	65812.8	65402.9	65145.4	64254	63679.2	63061.9	62386.6	61551.3	61071.3	60265.3	59741.3	58642.2	58180.6	57194.2	56695.8	55690
	442	55354.7	57415	58898.4	60934.2	62618.9	63689.9	64746.9	65488.9	66512.3	67192.2	66834.7	67629.6	67352.7	67539.3	67438.3	66819.9	66403.7	66142.4	65237.3	64653.7	64027	63341.4	62493.3	62005.9	61187.6	60655.5	59539.6	59071	58069.4	57563.5	56542.3
	443	55793.9	57870.6	59365.7	61417.7	63115.8	64195.2	65260.6	66008.5	67040	67725.3	67365	68166.2	67887.1	68075.1	67973.4	67350.1	66930.6	66667.2	65754.9	65166.7	64535	63843.9	62989.1	62497.9	61673.1	61136.8	60012.1	59539.7	58530.2	58020.2	56990.9
	444	56247.1	58340.6	59847.9	61916.5	63628.4	64716.6	65790.7	66544.6	67584.6	68275.4	67912.1	68719.9	68438.5	68628.1	68525.5	67897.1	67474.2	67208.6	66289	65696	65059.2	64362.5	63500.7	63005.5	62174	61633.3	60499.5	60023.2	59005.6	58491.4	57453.8
	445	57157.6	59285	60816.7	62918.8	64658.4	65764.2	66855.7	67621.8	68678.6	69380.6	69011.5	69832.3	69546.4	69739	69634.8	68996.2	68566.5	68296.6	67362.1	66759.5	66112.3	65404.4	64528.7	64025.4	63180.4	62631.1	61478.8	60994.9	59960.7	59438.3	58383.8
	446	57883.5	60037.9	61589	63717.8	65479.5	66599.4	67704.7	68480.6	69550.8	70261.7	69887.9	70719.1	70429.6	70624.6	70519.1	69872.4	69437.2	69163.9	68217.5	67607.2	66951.9	66234.9	65348.1	64838.5	63982.8	63426.4	62259.6	61769.5	60722.2	60193.1	59125.3
	447	58747.5	60934	62508.3	64668.9	66456.9	67593.4	68715.3	69502.7	70588.9	71310.4	70931	71774.7	71480.8	71678.8	71571.7	70915.4	70473.6	70196.3	69235.7	68616.4	67951.2	67223.6	66323.5	65806.2	64937.8	64373.1	63188.9	62691.5	61628.5	61091.6	60007.8
	448	59160.9	61362.9	62948.2	65124	66924.6	68069.2	69198.9	69991.9	71085.7	71812.3	71430.3	72279.8	71983.9	72183.3	72075.4	71414.5	70969.6	70690.3	69723	69099.3	68429.5	67696.7	66790.3	66269.4	65394.8	64826.2	63633.6	63132.7	62062.3	61521.5	60430.1
	449	60000.4	62233.6	63841.4	66048.1	67874.2	69035	70180.8	70985	72094.3	72831.3	72443.8	73305.4	73005.3	73207.5	73098.1	72427.8	71976.6	71693.3	70712.3	70079.7	69400.4	68657.3	67738	67209.7	66322.7	65746	64536.5	64028.5	62942.9	62394.5	61287.6
	450	59575	61792.4	63388.8	65579.8	67393	68545.6	69683.3	70481.8	71583.2	72315	71930.2	72785.7	72487.8	72688.5	72579.9	71914.3	71466.4	71185.1	70211	69582.9	68908.4	68170.5	67257.8	66733.2	65852.5	65279.9	64079	63574.6	62496.7	61952.1	60853.1
	451	59433.1	61645.3	63237.9	65423.7	67232.5	68382.4	69517.3	70313.9	71412.8	72142.7	71758.9	72612.4	72315.1	72515.4	72407	71743.1	71296.2	71015.6	70043.8	69417.2	68744.4	68008.2	67097.6	66574.3	65695.7	65124.5	63926.4	63423.2	62347.8	61804.6	60708.2
	452	59750.4	61974.3	63575.4	65772.9	67591.4	68747.4	69888.4	70689.2	71794	72527.8	72142	73000	72701.1	72902.5	72793.5	72126	71676.7	71394.6	70417.7	69787.8	69111.3	68371.2	67455.8	66929.7	66046.4	65472.1	64267.6	63761.7	62680.6	62134.5	61032.2
	453	59649.1	61869.3	63467.7	65661.4	67476.8	68630.9	69769.9	70569.4	71672.3	72404.9	72019.7	72876.3	72577.9	72778.9	72670.2	72003.8	71555.3	71273.7	70298.4	69669.5	68994.2	68255.3	67341.5	66816.3	65934.5	65361.1	64158.7	63653.7	62574.4	62029.2	60928.8
	454	59520.1	61735.4	63330.4	65519.4	67330.9	68482.4	69619	70416.8	71517.3	72248.3	71863.9	72718.6	72420.9	72621.5	72513	71848	71400.5	71119.5	70146.3	69518.8	68844.9	68107.7	67195.8	66671.7	65791.8	65219.7	64019.9	63516	62439.1	61895	60797
	455	59429.4	61641.4	63233.9	65419.5	67228.3	68378.1	69512.9	70309.5	71408.3	72138.2	71754.4	72607.8	72310.6	72510.8	72402.5	71738.5	71291.7	71011.1	70039.4	69412.8	68740	68003.9	67093.4	66570.1	65691.6	65120.4	63922.3	63419.2	62343.9	61800.7	60704.3
	456	58217.6	60384.5	61944.5	64085.6	65857.5	66983.8	68095.5	68875.8	69952.2	70667.3	70291.3	71127.3	70836.1	71032.3	70926.1	70275.8	69838	69563.1	68611.3	67997.5	67338.4	66617.3	65725.3	65212.7	64352.1	63792.5	62618.9	62126	61072.7	60540.6	59466.5
	457	58142.8	60306.9	61864.9	64003.2	65772.8	66897.7	68008	68787.3	69862.3	70576.4	70201	71035.9	70745.1	70941	70835	70185.4	69748.3	69473.8	68523.1	67910.1	67251.8	66531.7	65640.9	65128.9	64269.4	63710.5	62538.5	62046.2	60994.2	60462.8	59390.1
	458	57915.7	60071.3	61623.3	63753.3	65515.9	66636.4	67742.4	68518.7	69589.4	70300.8	69926.8	70758.4	70468.8	70663.9	70558.3	69911.3	69475.8	69202.4	68255.5	67644.9	66989.1	66271.8	65384.5	64874.5	64018.4	63461.7	62294.2	61803.8	60756	60226.6	59158.2
	459	57074.2	59198.5	60727.9	62826.9	64564	65668.2	66758.1	67523.1	68578.3	69279.3	68910.7	69730.3	69444.9	69637.2	69533.1	68895.5	68466.4	68196.9	67263.7	66662	66015.8	65308.9	64434.5	63931.9	63088.2	62539.6	61389.1	60905.8	59873.2	59351.5	58298.6
	460	56757.5	58870.1	60391	62478.4	64205.8	65303.9	66387.7	67148.5	68197.9	68895	68528.4	69343.5	69059.6	69250.8	69147.4	68513.3	68086.5	67818.6	66890.6	66292.2	65649.6	64946.6	64077	63577.2	62738.2	62192.7	61048.5	60568	59541	59022.2	57975.2
	[nm]	D04	X40
[nm]		470	471	472	473	474	475	476	477	478	479	480	481	482	483	484	485	486	487	488	489	490	491	492	493	494	495	496	497	498	499	500
	430	362.943	370.448	371.088	378.877	385.195	386.314	389.55	390.671	393.981	395.983	395.503	398.787	393.278	396.599	394.902	389.808	388.549	389.422	381.28	382.227	381.058	379.006	372.614	373.383	369.226	369.146	362.627	362.529	355.847	354.286	350.325
	431	363.992	371.519	372.16	379.972	386.308	387.431	390.677	391.8	395.119	397.128	396.647	399.94	394.415	397.746	396.044	390.935	389.673	390.548	382.382	383.332	382.159	380.102	373.691	374.462	370.293	370.213	363.675	363.577	356.875	355.31	351.337
	432	362.923	370.428	371.068	378.857	385.174	386.294	389.53	390.65	393.959	395.962	395.482	398.766	393.257	396.578	394.881	389.787	388.529	389.401	381.26	382.207	381.037	378.986	372.594	373.363	369.206	369.126	362.608	362.51	355.828	354.267	350.306
	433	364.517	372.055	372.697	380.521	386.865	387.99	391.24	392.366	395.69	397.701	397.219	400.517	394.984	398.32	396.615	391.499	390.235	391.111	382.934	383.885	382.711	380.65	374.231	375.002	370.827	370.747	364.2	364.102	357.39	355.823	351.844
	434	371.846	379.535	380.19	388.171	394.643	395.79	399.106	400.254	403.645	405.697	405.205	408.569	402.925	406.328	404.589	399.37	398.08	398.975	390.633	391.603	390.405	388.303	381.754	382.542	378.283	378.201	371.522	371.422	364.575	362.977	358.918
	435	373.351	381.071	381.729	389.742	396.24	397.392	400.721	401.874	405.278	407.339	406.845	410.223	404.556	407.972	406.226	400.987	399.692	400.589	392.214	393.188	391.985	389.875	383.299	384.09	379.814	379.732	373.026	372.925	366.051	364.446	360.371
	436	373.662	381.389	382.048	390.067	396.571	397.724	401.056	402.209	405.617	407.679	407.184	410.565	404.894	408.313	406.565	401.321	400.025	400.924	392.541	393.516	392.312	390.2	383.619	384.41	380.131	380.049	373.337	373.236	366.357	364.75	360.672
	437	374.807	382.557	383.218	391.262	397.786	398.942	402.284	403.441	406.859	408.927	408.431	411.823	406.134	409.563	407.811	402.55	401.25	402.152	393.743	394.722	393.514	391.395	384.794	385.588	381.295	381.213	374.481	374.379	367.479	365.867	361.776
	438	378.922	386.757	387.425	395.558	402.153	403.322	406.701	407.871	411.326	413.417	412.916	416.344	410.593	414.06	412.288	406.97	405.656	406.567	398.066	399.056	397.834	395.693	389.019	389.822	385.482	385.398	378.592	378.49	371.513	369.884	365.748
	439	387.975	395.997	396.681	405.008	411.761	412.958	416.417	417.615	421.153	423.294	422.781	426.291	420.402	423.952	422.138	416.693	415.347	416.28	407.576	408.589	407.339	405.146	398.313	399.134	394.691	394.605	387.637	387.532	380.389	378.721	374.486
	440	385.372	393.341	394.02	402.291	408.999	410.188	413.624	414.814	418.328	420.454	419.945	423.431	417.582	421.108	419.306	413.898	412.561	413.488	404.842	405.848	404.607	402.428	395.641	396.457	392.043	391.959	385.037	384.933	377.837	376.181	371.974
	441	385.446	393.417	394.096	402.369	409.078	410.267	413.704	414.894	418.408	420.535	420.026	423.513	417.663	421.189	419.387	413.978	412.641	413.568	404.92	405.926	404.684	402.506	395.717	396.534	392.119	392.034	385.111	385.007	377.91	376.253	372.046
	442	385.277	393.244	393.923	402.191	408.898	410.086	413.522	414.711	418.224	420.35	419.841	423.327	417.479	421.004	419.203	413.795	412.459	413.386	404.742	405.748	404.506	402.329	395.543	396.359	391.946	391.862	384.941	384.837	377.744	376.087	371.882
	443	383.807	391.743	392.42	400.657	407.337	408.522	411.944	413.129	416.629	418.747	418.239	421.711	415.886	419.398	417.603	412.217	410.885	411.808	403.198	404.2	402.963	400.794	394.034	394.847	390.451	390.366	383.473	383.369	376.303	374.652	370.463
	444	386.729	394.725	395.407	403.707	410.438	411.632	415.08	416.274	419.8	421.934	421.423	424.922	419.052	422.591	420.782	415.355	414.013	414.943	406.267	407.277	406.031	403.845	397.034	397.853	393.423	393.338	386.392	386.288	379.167	377.505	373.284
	445	387.781	395.799	396.483	404.805	411.555	412.752	416.209	417.406	420.943	423.082	422.569	426.078	420.192	423.74	421.927	416.485	415.14	416.072	407.373	408.385	407.135	404.944	398.114	398.935	394.494	394.408	387.443	387.339	380.199	378.532	374.299
	446	386.713	394.71	395.391	403.691	410.422	411.615	415.063	416.257	419.784	421.917	421.406	424.905	419.035	422.574	420.765	415.338	413.997	414.927	406.251	407.261	406.014	403.829	397.018	397.837	393.407	393.322	386.377	386.272	379.152	377.489	373.269
	447	389.244	397.293	397.979	406.333	413.108	414.309	417.78	418.981	422.531	424.679	424.164	427.686	421.778	425.339	423.519	418.056	416.706	417.642	408.91	409.926	408.672	406.472	399.616	400.44	395.982	395.897	388.905	388.8	381.634	379.96	375.711
	448	384.833	392.791	393.469	401.728	408.427	409.614	413.045	414.233	417.743	419.866	419.357	422.839	416.998	420.519	418.72	413.319	411.984	412.91	404.276	405.281	404.041	401.866	395.088	395.903	391.495	391.41	384.498	384.394	377.309	375.654	371.454
	449	387.612	395.628	396.311	404.63	411.376	412.572	416.029	417.225	420.76	422.899	422.386	425.893	420.01	423.556	421.744	416.304	414.959	415.892	407.196	408.208	406.959	404.768	397.941	398.762	394.322	394.237	387.275	387.17	380.034	378.367	374.137
	450	378.985	386.821	387.489	395.623	402.22	403.389	406.768	407.938	411.394	413.485	412.984	416.413	410.661	414.129	412.356	407.038	405.723	406.634	398.132	399.121	397.9	395.758	389.084	389.886	385.545	385.462	378.655	378.552	371.575	369.945	365.809
	451	371.678	379.364	380.019	387.996	394.465	395.612	398.926	400.074	403.463	405.514	405.022	408.385	402.744	406.145	404.407	399.19	397.901	398.795	390.457	391.427	390.229	388.128	381.582	382.369	378.112	378.031	371.355	371.254	364.411	362.813	358.756
	452	366.011	373.58	374.225	382.08	388.451	389.58	392.844	393.974	397.311	399.331	398.847	402.159	396.603	399.952	398.241	393.104	391.834	392.715	384.503	385.459	384.279	382.211	375.765	376.539	372.347	372.267	365.693	365.594	358.855	357.281	353.287
	453	360.915	368.378	369.014	376.76	383.042	384.156	387.374	388.488	391.779	393.771	393.294	396.559	391.081	394.383	392.696	387.63	386.379	387.247	379.15	380.092	378.929	376.889	370.533	371.297	367.163	367.084	360.601	360.504	353.859	352.307	348.367
	454	354.712	362.047	362.672	370.285	376.459	377.554	380.716	381.811	385.046	387.003	386.534	389.743	384.36	387.605	385.947	380.968	379.738	380.591	372.633	373.559	372.416	370.411	364.164	364.915	360.853	360.775	354.403	354.308	347.777	346.252	342.38
	455	348.875	356.089	356.704	364.192	370.264	371.341	374.451	375.529	378.71	380.635	380.174	383.33	378.035	381.227	379.596	374.699	373.489	374.328	366.502	367.412	366.288	364.316	358.172	358.91	354.915	354.838	348.572	348.477	342.054	340.554	336.746
	456	337.28	344.254	344.848	352.087	357.958	358.999	362.006	363.047	366.123	367.984	367.538	370.589	365.47	368.556	366.979	362.246	361.076	361.887	354.32	355.201	354.114	352.207	346.267	346.981	343.118	343.044	336.986	336.895	330.685	329.235	325.554
	457	327.329	334.098	334.675	341.7	347.397	348.407	351.326	352.336	355.321	357.128	356.695	359.656	354.688	357.683	356.152	351.559	350.423	351.21	343.867	344.721	343.667	341.817	336.052	336.745	332.996	332.924	327.044	326.956	320.929	319.522	315.949
	458	318.879	325.473	326.035	332.879	338.429	339.413	342.257	343.241	346.149	347.908	347.487	350.372	345.532	348.45	346.959	342.483	341.377	342.144	334.99	335.823	334.795	332.993	327.377	328.052	324.399	324.329	318.602	318.516	312.645	311.274	307.793
	459	309.807	316.214	316.76	323.409	328.801	329.757	332.52	333.476	336.301	338.011	337.601	340.404	335.702	338.536	337.088	332.74	331.665	332.41	325.46	326.269	325.27	323.519	318.063	318.719	315.17	315.102	309.538	309.454	303.75	302.418	299.037
	460	303.094	309.361	309.896	316.401	321.676	322.611	325.314	326.25	329.013	330.686	330.285	333.027	328.427	331.2	329.783	325.529	324.478	325.207	318.407	319.198	318.222	316.509	311.171	311.812	308.341	308.274	302.83	302.748	297.168	295.865	292.556
	[nm]	D05	X41
[nm]		470	471	472	473	474	475	476	477	478	479	480	481	482	483	484	485	486	487	488	489	490	491	492	493	494	495	496	497	498	499	500
	430	55866.5	57943	59407	61497.1	63136.9	64229.5	65257.8	66047.3	67096.6	67700.6	67393.7	68143.9	67885.7	68066	67915.8	67348.2	66907.6	66651.7	65730.3	65139.2	64559.4	63806.9	62903	62459.8	61592.2	61113.5	59913.6	59503.2	58454.9	57912.6	56831.1
	431	55715.8	57786.6	59246.7	61331.2	62966.6	64056.2	65081.7	65869.1	66915.6	67518	67211.8	67960	67702.6	67882.3	67732.6	67166.5	66727.1	66471.8	65552.9	64963.4	64385.2	63634.7	62733.3	62291.3	61426	60948.6	59751.9	59342.6	58297.2	57756.4	56677.7
	432	56468.7	58567.5	60047.3	62160	63817.5	64921.8	65961.2	66759.2	67819.8	68430.4	68120.1	68878.4	68617.5	68799.6	68647.9	68074.2	67628.8	67370.1	66438.8	65841.3	65255.2	64494.6	63581	63133	62256.1	61772.2	60559.4	60144.5	59085	58536.8	57443.6
	433	57061.2	59182.1	60677.4	62812.2	64487.1	65603	66653.3	67459.7	68531.4	69148.4	68834.9	69601.1	69337.5	69521.5	69368.2	68788.5	68338.4	68077	67135.9	66532.2	65940	65171.4	64248.2	63795.5	62909.3	62420.4	61194.8	60775.6	59705	59151.1	58046.4
	434	58161.6	60323.4	61847.6	64023.6	65730.7	66868.2	67938.8	68760.7	69853.1	70482	70162.4	70943.4	70674.7	70862.3	70706	70115.1	69656.3	69389.9	68430.7	67815.3	67211.6	66428.2	65487.2	65025.8	64122.6	63624.2	62375	61947.7	60856.4	60291.8	59165.8
	435	59141.9	61340.1	62890	65102.7	66838.6	67995.2	69083.8	69919.6	71030.4	71669.9	71344.9	72139.1	71865.8	72056.6	71897.7	71296.8	70830.3	70559.4	69584	68958.2	68344.4	67547.8	66591	66121.8	65203.3	64696.5	63426.3	62991.8	61882.1	61308	60163
	436	59563.4	61777.3	63338.2	65566.7	67314.9	68479.8	69576.2	70418	71536.7	72180.7	71853.4	72653.2	72378	72570.2	72410.1	71805	71335.1	71062.3	70079.9	69449.7	68831.5	68029.2	67065.6	66593	65668	65157.6	63878.3	63440.7	62323.1	61744.9	60591.8
	437	60487	62735.2	64320.3	66583.3	68358.7	69541.7	70655	71509.8	72645.9	73299.9	72967.6	73779.8	73500.3	73695.4	73532.9	72918.4	72441.3	72164.2	71166.6	70526.6	69898.8	69084.1	68105.5	67625.6	66686.2	66168	64868.8	64424.4	63289.5	62702.3	61531.3
	438	61698.7	63991.9	65608.8	67917.1	69728.1	70934.7	72070.4	72942.3	74101.1	74768.2	74429.2	75257.7	74972.6	75171.7	75005.9	74379	73892.4	73609.8	72592.2	71939.4	71299	70468	69469.8	68980.3	68022.1	67493.4	66168.3	65715	64557.3	63958.4	62763.9
	439	63221.3	65571.2	67227.9	69593.3	71448.9	72685.3	73849	74742.5	75929.9	76613.4	76266.1	77115	76822.9	77026.9	76857	76214.7	75716	75426.4	74383.7	73714.8	73058.6	72207.1	71184.2	70682.7	69700.8	69159.1	67801.2	67336.8	66150.5	65536.8	64312.9
	440	63680.4	66047.3	67716.1	70098.6	71967.8	73213.2	74385.3	75285.2	76481.3	77169.8	76819.9	77675	77380.8	77586.2	77415.1	76768.1	76265.8	75974.1	74923.9	74250.1	73589.2	72731.4	71701.1	71195.9	70207	69661.3	68293.6	67825.8	66630.9	66012.7	64779.9
	441	64768	67175.3	68872.6	71295.8	73196.8	74463.5	75655.6	76570.9	77787.4	78487.7	78131.8	79001.5	78702.3	78911.2	78737.2	78079.1	77568.3	77271.6	76203.4	75518.1	74845.9	73973.5	72925.6	72411.8	71406	70851	69459.9	68984.1	67768.8	67140.1	65886.2
	442	65648.6	68088.7	69809.1	72265.2	74192.1	75476	76684.4	77612.1	78845.1	79554.9	79194.2	80075.7	79772.4	79984.2	79807.8	79140.8	78623	78322.3	77239.6	76545	75863.6	74979.3	73917.2	73396.4	72376.9	71814.4	70404.4	69922.1	68690.3	68053	66782.1
	443	66220.9	68682.2	70417.6	72895.1	74838.8	76133.9	77352.8	78288.7	79532.4	80248.4	79884.6	80773.8	80467.8	80681.4	80503.5	79830.7	79308.4	79005	77912.9	77212.2	76524.9	75632.9	74561.6	74036.2	73007.8	72440.4	71018.1	70531.6	69289.1	68646.3	67364.2
	444	66765.4	69246.9	70996.6	73494.5	75454.1	76759.9	77988.8	78932.3	80186.3	80908.2	80541.3	81437.9	81129.4	81344.8	81165.4	80487	79960.4	79654.6	78553.5	77847	77154.1	76254.8	75174.6	74644.9	73608.1	73036	71602	71111.5	69858.8	69210.6	67918.1
	445	67830.9	70352.1	72129.7	74667.4	76658.4	77985	79233.5	80192.1	81466.1	82199.5	81826.8	82737.6	82424.2	82643.1	82460.8	81771.6	81236.6	80925.9	79807.2	79089.5	78385.5	77471.8	76374.4	75836.3	74782.9	74201.7	72744.8	72246.4	70973.7	70315.3	69002.1
	446	68709.3	71263.1	73063.7	75634.3	77651.1	78994.8	80259.5	81230.6	82521	83263.9	82886.4	83809	83491.6	83713.2	83528.6	82830.5	82288.6	81973.8	80840.6	80113.6	79400.5	78475	77363.4	76818.3	75751.3	75162.5	73686.8	73182	71892.8	71225.8	69895.6
	447	69669.5	72259	74084.8	76691.3	78736.3	80098.8	81381.2	82365.8	83674.3	84427.6	84044.8	84980.3	84658.4	84883.1	84695.9	83988.1	83438.6	83119.4	81970.4	81233.2	80510.2	79571.7	78444.6	77891.9	76809.9	76212.9	74716.6	74204.7	72897.5	72221.2	70872.4
	448	70158.6	72766.3	74604.9	77229.7	79289	80661.1	81952.5	82944	84261.7	85020.2	84634.8	85576.8	85252.7	85479	85290.5	84577.7	84024.3	83702.9	82545.8	81803.5	81075.4	80130.3	78995.3	78438.7	77349.1	76747.9	75241.1	74725.6	73409.2	72728.2	71369.9
	449	71126	73769.6	75633.6	78294.6	80382.3	81773.3	83082.5	84087.6	85423.5	86192.5	85801.8	86756.8	86428.2	86657.7	86466.5	85743.9	85182.9	84857.1	83684	82931.5	82193.3	81235.2	80084.5	79520.2	78415.6	77806.2	76278.5	75756	74421.5	73731	72354
	450	70561.6	73184.3	75033.4	77673.4	79744.5	81124.5	82423.2	83420.4	84745.7	85508.6	85120.9	86068.4	85742.4	85970	85780.4	85063.5	84507	84183.7	83020	82273.4	81541.1	80590.6	79449	78889.2	77793.4	77188.8	75673.3	75154.9	73830.9	73146	71779.9
	451	70443.4	73061.6	74907.7	77543.2	79610.8	80988.5	82285.1	83280.6	84603.7	85365.3	84978.3	85924.2	85598.7	85826	85636.7	84921	84365.4	84042.7	82880.9	82135.5	81404.4	80455.6	79315.9	78757	77663	77059.4	75546.4	75028.9	73707.2	73023.4	71659.6
	452	70791	73422.1	75277.3	77925.8	80003.6	81388.1	82691.1	83691.5	85021.1	85786.5	85397.6	86348.2	86021.1	86249.4	86059.2	85340	84781.6	84457.3	83289.8	82540.8	81806.1	80852.5	79707.2	79145.6	78046.2	77439.7	75919.2	75399.1	74070.9	73383.7	72013.2
	453	70610	73234.4	75084.8	77726.6	79799.1	81180	82479.7	83477.6	84803.8	85567.2	85179.2	86127.4	85801.1	86028.9	85839.2	85121.8	84564.9	84241.4	83076.9	82329.8	81596.9	80645.8	79503.5	78943.3	77846.7	77241.7	75725.1	75206.4	73881.5	73196.1	71829.1
	454	70451.2	73069.7	74915.9	77551.7	79619.6	80997.4	82294.2	83289.8	84613	85374.7	84987.7	85933.7	85608.2	85835.4	85646.1	84930.4	84374.7	84051.9	82890	82144.6	81413.4	80464.5	79324.6	78765.7	77671.6	77068	75554.8	75037.2	73715.3	73031.4	71667.5
	455	70293.5	72906.2	74748.3	77378.3	79441.5	80816.2	82110.1	83103.5	84423.7	85183.7	84797.5	85741.4	85416.6	85643.4	85454.5	84740.4	84185.9	83863.9	82704.6	81960.8	81231.3	80284.4	79147.2	78589.5	77497.9	76895.5	75385.8	74869.4	73550.4	72868.1	71507.2
	456	68798.4	71355.5	73158.4	75732.4	77751.7	79097.2	80363.5	81335.8	82628	83371.8	82993.8	83917.6	83599.8	83821.7	83636.9	82937.9	82395.2	82080.1	80945.4	80217.5	79503.4	78576.7	77463.7	76917.9	75849.4	75259.9	73782.3	73276.8	71986	71318.1	69986.2
	457	68658	71209.9	73009.1	75577.9	77593.1	78935.8	80199.6	81169.9	82459.4	83201.7	82824.5	83746.4	83429.2	83650.7	83466.2	82768.7	82227.1	81912.6	80780.3	80053.8	79341.2	78416.4	77305.6	76760.9	75694.7	75106.4	73631.7	73127.3	71839.1	71172.6	69843.4
	458	68388.8	70930.7	72722.9	75281.5	77288.8	78626.3	79885.1	80851.6	82136	82875.5	82499.7	83418.1	83102.1	83322.7	83138.9	82444.1	81904.7	81591.4	80463.5	79739.9	79030.1	78108.9	77002.5	76459.9	75397.9	74811.9	73343	72840.6	71557.4	70893.5	69569.5
	459	67444.1	69950.9	71718.3	74241.6	76221.2	77540.2	78781.6	79734.8	81001.5	81730.7	81360.1	82265.8	81954.2	82171.7	81990.5	81305.3	80773.3	80464.4	79352	78638.4	77938.5	77030	75938.9	75403.8	74356.4	73778.5	72329.9	71834.4	70569	69914.3	68608.6
	460	67048.2	69540.3	71297.4	73805.8	75773.8	77085.1	78319.2	79266.8	80526	81251	80882.6	81782.9	81473.1	81689.4	81509.3	80828	80299.2	79992.1	78886.3	78176.8	77481	76577.9	75493.1	74961.2	73919.9	73345.4	71905.3	71412.8	70154.7	69503.9	68205.8
	[nm]	D06	X42
[nm]		470	471	472	473	474	475	476	477	478	479	480	481	482	483	484	485	486	487	488	489	490	491	492	493	494	495	496	497	498	499	500
	430	55602.2	57688.2	59223.9	61312.2	63028.9	64187.8	65181.5	66045.5	66987.8	67672.8	67386.4	68117.1	67869.8	68023.9	67940.5	67325.9	66958	66673.1	65744.2	65184.1	64560.7	63882	62915.9	62515.4	61616.7	61167.2	59834.9	59458.2	58417.2	57871	56864.1
	431	56439.8	58557.2	60116	62235.7	63978.3	65154.6	66163.3	67040.3	67996.8	68692.2	68401.5	69143.2	68892.1	69048.5	68963.9	68340.1	67966.6	67677.4	66734.5	66166	65533.2	64844.2	63863.6	63457	62544.8	62088.6	60736.2	60353.8	59297.2	58742.7	57720.7
	432	57087.7	59229.5	60806.2	62950.2	64712.8	65902.6	66922.9	67810	68777.5	69480.8	69186.7	69936.9	69683	69841.2	69755.6	69124.7	68746.9	68454.4	67500.6	66925.6	66285.6	65588.7	64596.8	64185.6	63262.9	62801.4	61433.5	61046.7	59977.9	59417.1	58383.3
	433	57793.8	59962	61558.2	63728.8	65513.2	66717.7	67750.6	68648.6	69628.1	70340.1	70042.4	70801.9	70544.9	70705	70618.4	69979.6	69597.1	69301	68335.5	67753.4	67105.4	66399.9	65395.7	64979.4	64045.3	63578.1	62193.3	61801.7	60719.7	60152	59105.4
	434	58697.4	60899.5	62520.7	64725.2	66537.5	67760.9	68809.9	69722	70716.7	71439.9	71137.6	71908.9	71647.8	71810.5	71722.5	71073.7	70685.3	70384.6	69403.9	68812.7	68154.6	67438	66418.2	65995.4	65046.7	64572.2	63165.7	62768	61669.1	61092.5	60029.5
	435	59731.6	61972.5	63622.2	65865.6	67709.8	68954.7	70022.2	70950.4	71962.7	72698.6	72390.9	73175.9	72910.2	73075.7	72986.2	72326	71930.7	71624.7	70626.7	70025.1	69355.4	68626.2	67588.4	67158.1	66192.7	65709.9	64278.6	63873.9	62755.6	62168.8	61087.2
	436	60185.5	62443.5	64105.8	66366.2	68224.4	69478.8	70554.4	71489.6	72509.6	73251.1	72941.1	73732	73464.3	73631.1	73540.9	72875.7	72477.4	72169	71163.5	70557.3	69882.5	69147.8	68102.1	67668.5	66695.8	66209.3	64767.1	64359.3	63232.6	62641.3	61551.5
	437	61084.9	63376.6	65063.7	67357.8	69243.9	70517	71608.7	72557.9	73593.1	74345.7	74031	74833.8	74562.1	74731.4	74639.8	73964.6	73560.4	73247.4	72226.9	71611.6	70926.7	70181	69119.7	68679.7	67692.4	67198.6	65734.9	65321	64177.4	63577.3	62471.2
	438	62339.7	64678.5	66400.3	68741.6	70666.4	71965.6	73079.7	74048.4	75104.9	75873	75551.9	76371.1	76093.8	76266.6	76173.1	75484.1	75071.5	74752.2	73710.6	73082.7	72383.8	71622.8	70539.6	70090.6	69083	68579.1	67085.3	66662.9	65495.9	64883.4	63754.6
	439	63965.7	66365.5	68132.1	70534.5	72509.5	73842.6	74985.8	75979.8	77063.8	77851.9	77522.4	78363	78078.5	78255.8	78159.8	77452.8	77029.5	76701.8	75633.1	74988.9	74271.7	73490.8	72379.4	71918.7	70884.8	70367.7	68835	68401.6	67204.1	66575.7	65417.4
	440	64287.8	66699.7	68475.2	70889.7	72874.6	74214.5	75363.4	76362.4	77451.9	78243.9	77912.8	78757.6	78471.7	78649.8	78553.4	77842.9	77417.4	77088.1	76014	75366.5	74645.7	73860.9	72743.9	72280.8	71241.8	70722.1	69181.7	68746.1	67542.5	66911	65746.8
	441	65472.3	67928.6	69736.9	72195.8	74217.3	75581.9	76751.9	77769.3	78878.9	79685.5	79348.3	80208.7	79917.5	80098.9	80000.7	79277.1	78843.8	78508.4	77414.5	76755.1	76021	75221.8	74084.2	73612.6	72554.4	72025.1	70456.3	70012.7	68787	68143.8	66958.2
	442	66422	68914	70748.5	73243.1	75293.9	76678.3	77865.4	78897.5	80023.2	80841.5	80499.4	81372.3	81076.8	81260.9	81161.3	80427.2	79987.6	79647.3	78537.6	77868.6	77123.8	76313	75158.9	74680.5	73606.9	73070	71478.4	71028.4	69784.8	69132.3	67929.5
	443	66983.4	69496.4	71346.4	73862.1	75930.2	77326.3	78523.4	79564.3	80699.4	81524.7	81179.7	82059.9	81762	81947.6	81847.2	81106.8	80663.5	80320.4	79201.3	78526.6	77775.6	76957.9	75794.1	75311.6	74229	73687.5	72082.5	71628.6	70374.6	69716.6	68503.6
	444	67518.8	70051.9	71916.8	74452.5	76537.2	77944.4	79151.1	80200.3	81344.6	82176.4	81828.6	82715.9	82415.6	82602.7	82501.5	81755.2	81308.4	80962.5	79834.4	79154.4	78397.4	77573.1	76400	75913.6	74822.3	74276.5	72658.7	72201.2	70937.2	70273.9	69051.2
	445	68608	71182	73076.9	75653.6	77771.9	79201.8	80427.9	81494	82656.7	83502	83148.6	84050.2	83745.1	83935.2	83832.3	83074	82620	82268.5	81122.3	80431.2	79662	78824.5	77632.4	77138.2	76029.3	75474.7	73830.8	73365.9	72081.5	71407.5	70165.1
	446	69500.5	72107.9	74027.5	76637.7	78783.5	80232.1	81474.2	82554.1	83732	84588.2	84230.3	85143.6	84834.4	85027.1	84922.8	84154.7	83694.7	83338.7	82177.5	81477.5	80698.3	79849.8	78642.3	78141.6	77018.3	76456.5	74791.2	74320.3	73019.1	72336.4	71077.8
	447	70449.4	73092.4	75038.2	77684	79859.2	81327.5	82586.5	83681.3	84875.2	85743.1	85380.3	86306.1	85992.7	86187.9	86082.3	85303.6	84837.4	84476.5	83299.5	82589.9	81800.1	80940	79716	79208.5	78069.9	77500.4	75812.3	75335	74016.1	73324	72048.2
	448	70936.1	73597.4	75556.6	78220.7	80410.9	81889.3	83157.1	84259.4	85461.5	86335.5	85970.1	86902.3	86586.8	86783.4	86677	85893	85423.5	85060.1	83875	83160.5	82365.2	81499.2	80266.7	79755.7	78609.2	78035.8	76336.1	75855.4	74527.4	73830.5	72546
	449	71996.1	74697.1	76685.6	79389.5	81612.5	83113	84399.7	85518.4	86738.6	87625.6	87254.7	88200.9	87880.6	88080.2	87972.2	87176.4	86700	86331.1	85128.3	84403.1	83595.9	82717	81466.1	80947.5	79783.9	79201.9	77476.8	76988.9	75641	74933.8	73630
	450	71398.5	74077.2	76049.1	78730.6	80935.1	82423.2	83699.2	84808.6	86018.6	86898.3	86530.5	87468.8	87151.2	87349.1	87242	86452.9	85980.4	85614.6	84421.7	83702.6	82902.1	82030.5	80790	80275.7	79121.7	78544.5	76833.7	76349.9	75013.2	74311.8	73018.9
	451	71234.1	73906.6	75874	78549.4	80748.8	82233.4	83506.5	84613.4	85820.6	86698.2	86331.3	87267.4	86950.6	87148	87041.2	86253.9	85782.4	85417.5	84227.4	83509.9	82711.2	81841.6	80604	80090.8	78939.5	78363.7	76656.8	76174.1	74840.5	74140.8	72850.8
	452	71622.1	74309.1	76287.3	78977.2	81188.5	82681.3	83961.3	85074.2	86288	87170.4	86801.5	87742.7	87424.1	87622.6	87515.2	86723.6	86249.6	85882.7	84686.1	83964.7	83161.7	82287.4	81042.9	80527	79369.4	78790.5	77074.3	76589	75248.1	74544.5	73247.6
	453	71393.9	74072.4	76044.2	78725.5	80929.9	82417.9	83693.8	84803.2	86013.1	86892.7	86525	87463.2	87145.6	87343.5	87236.4	86447.3	85974.8	85609.1	84416.3	83697.2	82896.8	82025.2	80784.7	80270.5	79116.6	78539.4	76828.8	76345	75008.4	74307	73014.2
	454	71368	74045.5	76016.6	78697	80900.5	82387.9	83663.4	84772.4	85981.9	86861.2	86493.6	87431.4	87114	87311.8	87204.8	86416	85943.6	85578	84385.7	83666.8	82866.7	81995.4	80755.4	80241.4	79087.9	78510.9	76800.9	76317.3	74981.2	74280.1	72987.7
	455	71176.3	73846.6	75812.4	78485.6	80683.2	82166.6	83438.7	84544.7	85750.9	86627.8	86261.2	87196.6	86880	87077.3	86970.5	86183.8	85712.8	85348.1	84159	83442.1	82644.1	81775.2	80538.5	80025.8	78875.4	78300.1	76594.6	76112.3	74779.8	74080.6	72791.7
	456	69725	72340.8	74266.6	76885.2	79038	80491.2	81737.3	82820.8	84002.4	84861.4	84502.3	85418.6	85108.4	85301.7	85197.1	84426.5	83965.1	83607.8	82442.9	81740.7	80958.9	80107.7	78896.3	78394	77267.1	76703.5	75032.8	74560.3	73255	72570	71307.4
	457	69615.5	72227.3	74150	76764.6	78914	80364.9	81609	82690.8	83870.6	84728.3	84369.7	85284.5	84974.9	85167.8	85063.4	84294	83833.3	83476.6	82313.6	81612.4	80831.9	79982	78772.5	78271	77145.8	76583.1	74915	74443.3	73140	72456.1	71195.5
	458	69350.3	71952.1	73867.5	76472	78613.3	80058.7	81298	82375.7	83551	84405.4	84048.2	84959.5	84651.1	84843.3	84739.3	83972.8	83513.8	83158.5	81999.9	81301.4	80523.8	79677.2	78472.3	77972.7	76851.9	76291.3	74629.5	74159.6	72861.3	72180	70924.2
	459	68464	71032.5	72923.4	75494.7	77608.6	79035.5	80259.1	81322.9	82483.2	83326.7	82974.1	83873.8	83569.2	83759	83656.3	82899.6	82446.5	82095.8	80951.9	80262.4	79494.8	78659	77469.4	76976.3	75869.7	75316.3	73675.8	73211.9	71930.1	71257.5	70017.8
	460	68042.4	70595.2	72474.5	75029.9	77130.8	78548.9	79764.9	80822.3	81975.4	82813.7	82463.2	83357.4	83054.7	83243.3	83141.3	82389.2	81938.9	81590.3	80453.5	79768.2	79005.3	78174.7	76992.5	76502.3	75402.6	74852.6	73222.2	72761.1	71487.3	70818.8	69586.7
	[nm]	D07	X43
[nm]		470	471	472	473	474	475	476	477	478	479	480	481	482	483	484	485	486	487	488	489	490	491	492	493	494	495	496	497	498	499	500
	430	1548.69	1572.14	1583.15	1612.29	1636.54	1643.97	1656.38	1657.41	1671.87	1681.1	1665.29	1675.98	1665.2	1670.09	1664.95	1646.18	1644.13	1634.78	1622	1604.46	1592.26	1576.83	1564.85	1557.15	1537.08	1530.32	1509.35	1499.52	1482.3	1470.65	1447.59
	431	1546.05	1569.46	1580.45	1609.55	1633.75	1641.17	1653.56	1654.58	1669.03	1678.24	1662.45	1673.13	1662.37	1667.25	1662.11	1643.38	1641.33	1632	1619.24	1601.72	1589.55	1574.14	1562.19	1554.5	1534.46	1527.71	1506.78	1496.97	1479.78	1468.14	1445.13
	432	1552.89	1576.41	1587.45	1616.67	1640.98	1648.43	1660.88	1661.91	1676.42	1685.67	1669.81	1680.54	1669.73	1674.63	1669.47	1650.66	1648.6	1639.23	1626.41	1608.82	1596.59	1581.11	1569.1	1561.38	1541.26	1534.47	1513.45	1503.59	1486.33	1474.65	1451.53
	433	1565.74	1589.45	1600.58	1630.04	1654.56	1662.07	1674.61	1675.65	1690.28	1699.61	1683.62	1694.43	1683.54	1688.48	1683.28	1664.31	1662.24	1652.78	1639.86	1622.12	1609.79	1594.19	1582.08	1574.3	1554	1547.17	1525.97	1516.03	1498.62	1486.84	1463.53
	434	1578.75	1602.66	1613.88	1643.59	1668.31	1675.88	1688.53	1689.58	1704.33	1713.74	1697.62	1708.52	1697.53	1702.51	1697.27	1678.14	1676.05	1666.52	1653.49	1635.6	1623.17	1607.44	1595.23	1587.38	1566.92	1560.02	1538.65	1528.63	1511.07	1499.2	1475.69
	435	1603.34	1627.62	1639.02	1669.19	1694.29	1701.98	1714.83	1715.9	1730.88	1740.43	1724.06	1735.13	1723.97	1729.03	1723.71	1704.28	1702.16	1692.48	1679.24	1661.08	1648.45	1632.47	1620.08	1612.11	1591.33	1584.32	1562.62	1552.44	1534.61	1522.55	1498.68
	436	1601.22	1625.46	1636.85	1666.98	1692.05	1699.73	1712.56	1713.62	1728.58	1738.13	1721.78	1732.83	1721.69	1726.74	1721.42	1702.02	1699.9	1690.24	1677.02	1658.88	1646.27	1630.31	1617.93	1609.97	1589.22	1582.22	1560.55	1550.38	1532.58	1520.53	1496.69
	437	1609.49	1633.86	1645.3	1675.59	1700.79	1708.51	1721.41	1722.48	1737.51	1747.1	1730.67	1741.78	1730.58	1735.66	1730.31	1710.81	1708.68	1698.97	1685.68	1667.45	1654.77	1638.73	1626.29	1618.29	1597.43	1590.4	1568.61	1558.39	1540.5	1528.39	1504.43
	438	1626.95	1651.59	1663.15	1693.77	1719.24	1727.05	1740.09	1741.17	1756.36	1766.06	1749.45	1760.68	1749.36	1754.49	1749.09	1729.38	1727.22	1717.4	1703.97	1685.54	1672.73	1656.51	1643.93	1635.85	1614.76	1607.65	1585.63	1575.3	1557.21	1544.97	1520.75
	439	1654.22	1679.27	1691.03	1722.16	1748.06	1755.99	1769.25	1770.35	1785.8	1795.66	1778.77	1790.19	1778.68	1783.9	1778.41	1758.36	1756.17	1746.19	1732.53	1713.79	1700.76	1684.28	1671.49	1663.27	1641.83	1634.6	1612.21	1601.7	1583.31	1570.87	1546.24
	440	1640.15	1664.99	1676.65	1707.51	1733.19	1741.06	1754.2	1755.29	1770.62	1780.39	1763.64	1774.97	1763.55	1768.73	1763.28	1743.41	1741.24	1731.34	1717.8	1699.22	1686.3	1669.95	1657.27	1649.12	1627.86	1620.7	1598.5	1588.08	1569.85	1557.51	1533.09
	441	1654.66	1679.71	1691.48	1722.62	1748.52	1756.46	1769.72	1770.82	1786.28	1796.14	1779.24	1790.66	1779.15	1784.37	1778.88	1758.83	1756.64	1746.65	1732.99	1714.24	1701.21	1684.72	1671.93	1663.71	1642.26	1635.03	1612.63	1602.13	1583.73	1571.28	1546.65
	442	1658.24	1683.35	1695.14	1726.34	1752.31	1760.26	1773.55	1774.65	1790.14	1800.02	1783.09	1794.54	1783	1788.23	1782.73	1762.64	1760.44	1750.43	1736.74	1717.95	1704.89	1688.37	1675.55	1667.31	1645.81	1638.57	1616.12	1605.6	1587.16	1574.68	1549.99
	443	1649.33	1674.3	1686.03	1717.07	1742.89	1750.8	1764.02	1765.11	1780.52	1790.35	1773.51	1784.9	1773.42	1778.62	1773.15	1753.16	1750.98	1741.02	1727.41	1708.72	1695.73	1679.3	1666.55	1658.35	1636.97	1629.77	1607.44	1596.97	1578.63	1566.22	1541.67
	444	1643.88	1668.77	1680.46	1711.39	1737.13	1745.02	1758.19	1759.28	1774.64	1784.44	1767.65	1779	1767.56	1772.75	1767.29	1747.37	1745.19	1735.27	1721.7	1703.08	1690.13	1673.75	1661.04	1652.87	1631.56	1624.38	1602.13	1591.69	1573.41	1561.05	1536.57
	445	1640.77	1665.61	1677.28	1708.15	1733.84	1741.71	1754.86	1755.95	1771.28	1781.06	1764.3	1775.63	1764.21	1769.39	1763.94	1744.06	1741.89	1731.98	1718.44	1699.85	1686.93	1670.58	1657.89	1649.74	1628.47	1621.3	1599.09	1588.68	1570.43	1558.09	1533.66
	446	1635.16	1659.92	1671.54	1702.32	1727.92	1735.76	1748.86	1749.95	1765.23	1774.97	1758.27	1769.56	1758.18	1763.34	1757.91	1738.1	1735.94	1726.07	1712.57	1694.04	1681.17	1664.87	1652.23	1644.1	1622.91	1615.76	1593.63	1583.25	1565.07	1552.77	1528.42
	447	1628.86	1653.53	1665.11	1695.76	1721.26	1729.07	1742.13	1743.21	1758.43	1768.13	1751.5	1762.75	1751.41	1756.55	1751.14	1731.41	1729.25	1719.42	1705.97	1687.52	1674.69	1658.46	1645.86	1637.77	1616.66	1609.54	1587.49	1577.15	1559.04	1546.78	1522.53
	448	1621.6	1646.16	1657.69	1688.2	1713.59	1721.37	1734.37	1735.44	1750.59	1760.26	1743.7	1754.89	1743.61	1748.72	1743.34	1723.69	1721.54	1711.76	1698.37	1680	1667.23	1651.07	1638.53	1630.47	1609.45	1602.37	1580.42	1570.12	1552.09	1539.89	1515.75
	449	1619.21	1643.72	1655.23	1685.71	1711.06	1718.82	1731.8	1732.87	1748	1757.65	1741.12	1752.3	1741.03	1746.14	1740.76	1721.14	1719	1709.22	1695.86	1677.51	1664.76	1648.63	1636.11	1628.06	1607.07	1600	1578.08	1567.8	1549.8	1537.61	1513.51
	450	1566.37	1590.09	1601.23	1630.71	1655.23	1662.74	1675.3	1676.34	1690.97	1700.3	1684.31	1695.12	1684.22	1689.17	1683.96	1664.99	1662.91	1653.46	1640.52	1622.78	1610.44	1594.84	1582.72	1574.94	1554.64	1547.79	1526.59	1516.65	1499.23	1487.45	1464.13
	451	1526.45	1549.57	1560.42	1589.14	1613.04	1620.36	1632.6	1633.61	1647.87	1656.97	1641.38	1651.92	1641.29	1646.11	1641.04	1622.55	1620.53	1611.31	1598.71	1581.42	1569.4	1554.19	1542.38	1534.8	1515.01	1508.34	1487.68	1477.99	1461.02	1449.53	1426.81
	452	1514.97	1537.91	1548.68	1577.19	1600.91	1608.17	1620.31	1621.32	1635.47	1644.5	1629.03	1639.49	1628.95	1633.73	1628.7	1610.34	1608.34	1599.19	1586.68	1569.52	1557.59	1542.49	1530.78	1523.25	1503.61	1497	1476.49	1466.87	1450.03	1438.63	1416.07
	453	1472.52	1494.82	1505.28	1533	1556.05	1563.11	1574.91	1575.89	1589.65	1598.42	1583.39	1593.55	1583.3	1587.95	1583.06	1565.22	1563.27	1554.38	1542.23	1525.54	1513.95	1499.27	1487.89	1480.57	1461.48	1455.05	1435.12	1425.77	1409.4	1398.32	1376.4
	454	1438.7	1460.49	1470.72	1497.79	1520.32	1527.22	1538.75	1539.7	1553.14	1561.72	1547.03	1556.96	1546.95	1551.49	1546.71	1529.28	1527.37	1518.69	1506.81	1490.51	1479.18	1464.85	1453.72	1446.57	1427.92	1421.64	1402.16	1393.03	1377.03	1366.21	1344.79
	455	1395.61	1416.74	1426.66	1452.93	1474.78	1481.47	1492.65	1493.58	1506.62	1514.94	1500.69	1510.32	1500.61	1505.01	1500.38	1483.47	1481.62	1473.2	1461.67	1445.86	1434.87	1420.97	1410.18	1403.24	1385.15	1379.05	1360.16	1351.3	1335.78	1325.28	1304.51
	456	1341.59	1361.9	1371.44	1396.68	1417.69	1424.12	1434.88	1435.77	1448.3	1456.29	1442.59	1451.86	1442.52	1446.75	1442.3	1426.05	1424.27	1416.17	1405.09	1389.9	1379.33	1365.96	1355.59	1348.92	1331.53	1325.67	1307.51	1298.99	1284.08	1273.98	1254.01
	457	1306.41	1326.19	1335.48	1360.06	1380.51	1386.78	1397.25	1398.12	1410.32	1418.11	1404.77	1413.79	1404.69	1408.82	1404.48	1388.65	1386.92	1379.04	1368.25	1353.45	1343.16	1330.14	1320.04	1313.55	1296.62	1290.91	1273.23	1264.93	1250.41	1240.58	1221.13
	458	1265.59	1284.75	1293.75	1317.57	1337.38	1343.45	1353.59	1354.43	1366.26	1373.8	1360.88	1369.61	1360.81	1364.8	1360.6	1345.26	1343.59	1335.95	1325.5	1311.16	1301.2	1288.58	1278.8	1272.51	1256.1	1250.58	1233.44	1225.41	1211.34	1201.82	1182.97
	459	1221.63	1240.13	1248.81	1271.8	1290.93	1296.79	1306.58	1307.39	1318.8	1326.08	1313.61	1322.04	1313.54	1317.4	1313.34	1298.54	1296.92	1289.55	1279.46	1265.62	1256	1243.83	1234.38	1228.31	1212.48	1207.14	1190.6	1182.85	1169.26	1160.07	1141.89
	460	1187.8	1205.79	1214.23	1236.59	1255.18	1260.88	1270.4	1271.19	1282.28	1289.36	1277.23	1285.43	1277.17	1280.92	1276.97	1262.58	1261.01	1253.84	1244.03	1230.58	1221.22	1209.39	1200.2	1194.3	1178.9	1173.71	1157.63	1150.09	1136.89	1127.95	1110.27
	[nm]	D08	X44
[nm]		470	471	472	473	474	475	476	477	478	479	480	481	482	483	484	485	486	487	488	489	490	491	492	493	494	495	496	497	498	499	500
	430	52086.3	54130.6	55517	57517.9	59031.8	60148.1	61112.1	61898.5	62835.1	63476.7	63266	63973.4	63769.5	63890.2	63897.2	63250.9	62920.4	62665.8	61745.5	61213.2	60662.2	60047.7	59177.7	58785.1	57950.7	57464.1	56339.4	55890.2	54971.5	54509.7	53558.3
	431	52349.2	54403.9	55797.3	57808.3	59329.8	60451.8	61420.6	62211	63152.3	63797.2	63585.4	64296.4	64091.4	64212.7	64219.8	63570.2	63238	62982.2	62057.2	61522.2	60968.5	60350.8	59476.4	59081.9	58243.2	57754.2	56623.9	56172.4	55249	54784.9	53828.7
	432	52963.2	55042	56451.8	58486.3	60025.7	61160.8	62141	62940.7	63893.1	64545.5	64331.2	65050.5	64843.2	64965.9	64973	64315.8	63979.8	63720.9	62785.1	62243.9	61683.6	61058.7	60174	59774.8	58926.4	58431.6	57288	56831.2	55897	55427.5	54460
	433	53699.1	55806.7	57236.1	59298.9	60859.7	62010.6	63004.4	63815.1	64780.8	65442.3	65225	65954.3	65744.1	65868.5	65875.8	65209.4	64868.7	64606.3	63657.4	63108.7	62540.6	61907	61010.1	60605.3	59745.1	59243.5	58084	57620.8	56673.6	56197.6	55216.7
	434	54601.5	56744.5	58197.9	60295.4	61882.4	63052.7	64063.2	64887.5	65869.4	66542	66321.1	67062.7	66848.9	66975.4	66982.8	66305.2	65958.8	65691.9	64727.1	64169.2	63591.6	62947.3	62035.3	61623.8	60749.1	60239	59060	58589.1	57626	57142	56144.6
	435	55486.5	57664.3	59141.2	61272.7	62885.4	64074.7	65101.6	65939.3	66937.1	67620.5	67396.1	68149.7	67932.4	68061	68068.5	67380	67027.9	66756.7	65776.3	65209.3	64622.3	63967.6	63040.8	62622.6	61733.7	61215.4	60017.3	59538.8	58560	58068.2	57054.6
	436	55953.8	58150	59639.3	61788.8	63415.1	64614.3	65649.9	66494.6	67500.8	68190.1	67963.7	68723.7	68504.6	68634.2	68641.8	67947.5	67592.4	67319	66330.3	65758.5	65166.6	64506.4	63571.8	63150.1	62253.7	61731	60522.8	60040.2	59053.2	58557.3	57535.2
	437	56812.8	59042.6	60554.9	62737.3	64388.6	65606.2	66657.7	67515.4	68537	69236.8	69007	69778.6	69556.2	69687.8	69695.5	68990.5	68630	68352.4	67348.5	66767.9	66166.9	65496.6	64547.7	64119.5	63209.3	62678.6	61451.9	60961.9	59959.8	59456.2	58418.4
	438	57962.6	60237.6	61780.4	64007	65691.7	66934	68006.7	68881.8	69924.1	70638.1	70403.6	71190.9	70963.9	71098.2	71106.1	70386.8	70019	69735.7	68711.5	68119.3	67506.1	66822.2	65854	65417.2	64488.6	63947.2	62695.6	62195.7	61173.3	60659.5	59600.7
	439	59448.1	61781.4	63363.8	65647.5	67375.3	68649.5	69749.7	70647.2	71716.3	72448.5	72208	73015.4	72782.7	72920.4	72928.5	72190.8	71813.6	71523	70472.6	69865.1	69236.2	68534.8	67541.8	67093.8	66141.4	65586.1	64302.5	63789.8	62741.1	62214.2	61128.2
	440	59800.2	62147.3	63739	66036.3	67774.3	69056	70162.7	71065.6	72140.9	72877.5	72635.6	73447.8	73213.7	73352.2	73360.3	72618.3	72238.8	71946.6	70889.9	70278.8	69646.2	68940.6	67941.8	67491.1	66533.1	65974.5	64683.2	64167.5	63112.7	62582.6	61490.2
	441	60879.9	63269.4	64889.8	67228.5	68998	70302.8	71429.5	72348.7	73443.4	74193.3	73947.1	74773.9	74535.5	74676.6	74684.8	73929.4	73543.1	73245.6	72169.8	71547.7	70903.7	70185.4	69168.5	68709.6	67734.3	67165.6	65851.1	65326	64252.2	63712.5	62600.4
	442	61656.2	64076.2	65717.3	68085.8	69877.8	71199.3	72340.4	73271.2	74380	75139.4	74890	75727.4	75486	75628.8	75637.2	74872.1	74480.9	74179.6	73090.1	72460.1	71807.8	71080.3	70050.5	69585.8	68598.1	68022.1	66690.8	66159.1	65071.5	64524.9	63398.7
	443	62211.4	64653.2	66309.1	68699	70507.1	71840.5	72991.8	73931.1	75049.8	75816.1	75564.4	76409.4	76165.8	76309.9	76318.4	75546.4	75151.6	74847.6	73748.3	73112.6	72454.5	71720.5	70681.3	70212.5	69215.8	68634.7	67291.4	66754.9	65657.5	65106	63969.6
	444	62756.8	65220	66890.4	69301.2	71125.2	72470.2	73631.7	74579.2	75707.7	76480.7	76226.8	77079.2	76833.5	76978.9	76987.4	76208.6	75810.4	75503.7	74394.8	73753.5	73089.6	72349.2	71300.9	70828	69822.6	69236.4	67881.3	67340	66233	65676.8	64530.4
	445	63811.9	66316.5	68015	70466.4	72321	73688.7	74869.7	75833.1	76980.6	77766.6	77508.5	78375.1	78125.3	78273.1	78281.8	77490	77085	76773.2	75645.6	74993.6	74318.5	73565.6	72499.7	72018.8	70996.5	70400.4	69022.6	68472.2	67346.6	66781	65615.3
	446	64696	67235.3	68957.3	71442.6	73323	74709.6	75906.9	76883.7	78047.1	78844	78582.3	79460.9	79207.6	79357.5	79366.3	78563.5	78153	77836.8	76693.6	76032.5	75348.1	74584.8	73504.1	73016.5	71980.1	71375.8	69978.8	69420.9	68279.7	67706.2	66524.4
	447	65477.1	68047.1	69789.9	72305.2	74208.3	75611.6	76823.4	77812	78989.4	79796	79531.1	80420.4	80164	80315.7	80324.6	79512.1	79096.6	78776.6	77619.6	76950.6	76257.9	75485.3	74391.7	73898.2	72849.2	72237.6	70823.8	70259.1	69104.1	68523.7	67327.6
	448	65955	68543.7	70299.3	72832.9	74749.9	76163.5	77384.1	78379.9	79566	80378.4	80111.5	81007.3	80749.1	80901.9	80910.8	80092.4	79673.9	79351.6	78186.1	77512.2	76814.5	76036.3	74934.6	74437.5	73380.9	72764.8	71340.7	70771.9	69608.4	69023.8	67819
	449	66875	69499.8	71279.9	73848.9	75792.6	77225.9	78463.6	79473.2	80675.8	81499.6	81229	82137.3	81875.5	82030.4	82039.4	81209.6	80785.3	80458.4	79276.8	78593.4	77885.9	77096.9	75979.9	75475.8	74404.5	73779.8	72335.8	71759	70579.4	69986.6	68765
	450	66375	68980.1	70746.9	73296.7	75225.9	76648.4	77876.9	78879	80072.6	80890.2	80621.6	81523.1	81263.2	81417	81426	80602.4	80181.2	79856.8	78684	78005.7	77303.6	76520.4	75411.7	74911.5	73848.1	73228.1	71794.9	71222.5	70051.7	69463.3	68250.8
	451	66232.1	68831.6	70594.6	73138.9	75063.9	76483.4	77709.2	78709.1	79900.2	80716	80448.1	81347.6	81088.3	81241.7	81250.7	80428.9	80008.6	79684.9	78514.6	77837.8	77137.1	76355.7	75249.4	74750.2	73689.2	73070.5	71640.4	71069.1	69900.8	69313.7	68103.9
	452	66457.6	69066	70835	73387.9	75319.5	76743.8	77973.8	78977.1	80172.2	80990.8	80722	81624.6	81364.4	81518.3	81527.3	80702.7	80281	79956.2	78781.9	78102.8	77399.8	76615.6	75505.6	75004.7	73940.1	73319.2	71884.3	71311.1	70138.8	69549.7	68335.8
	453	66314.8	68917.6	70682.8	73230.3	75157.7	76579	77806.3	78807.5	80000	80816.9	80548.6	81449.3	81189.6	81343.2	81352.2	80529.4	80108.6	79784.5	78612.7	77935	77233.5	76451.1	75343.4	74843.6	73781.2	73161.8	71729.9	71157.9	69988.2	69400.3	68189
	454	66279.5	68881	70645.2	73191.3	75117.7	76538.2	77764.9	78765.5	79957.4	80773.8	80505.7	81405.9	81146.4	81299.9	81308.9	80486.5	80065.9	79742	78570.8	77893.6	77192.4	76410.4	75303.3	74803.8	73742	73122.8	71691.7	71120.1	69950.9	69363.4	68152.7
	455	66065.1	68658.1	70416.6	72954.5	74874.7	76290.6	77513.3	78510.7	79698.7	80512.5	80245.2	81142.5	80883.8	81036.9	81045.9	80226.1	79806.9	79484	78316.6	77641.5	76942.7	76163.1	75059.7	74561.7	73503.4	72886.2	71459.7	70890	69724.6	69139	67932.2
	456	64682	67220.8	68942.5	71427.2	73307.2	74693.5	75890.6	76867.1	78030.3	78827	78565.3	79443.8	79190.6	79340.4	79349.2	78546.6	78136.1	77820	76677.1	76016.1	75331.9	74568.7	73488.3	73000.8	71964.6	71360.4	69963.7	69405.9	68264.9	67691.6	66510
	457	64606.2	67142	68861.7	71343.5	73221.2	74605.9	75801.6	76777	77938.8	78734.6	78473.2	79350.7	79097.7	79247.4	79256.2	78454.5	78044.6	77728.8	76587.2	75927	75243.6	74481.3	73402.2	72915.2	71880.2	71276.7	69881.7	69324.5	68184.9	67612.2	66432.1
	458	64309.6	66833.7	68545.5	71016	72885.1	74263.4	75453.6	76424.5	77581	78373.2	78113	78986.4	78734.6	78883.6	78892.3	78094.3	77686.3	77372	76235.6	75578.5	74898.2	74139.4	73065.2	72580.5	71550.3	70949.5	69560.9	69006.3	67871.9	67301.8	66127.1
	459	63410.5	65899.3	67587.2	70023.1	71866.1	73225.1	74398.7	75356	76496.3	77277.4	77020.9	77882.1	77633.8	77780.7	77789.3	77002.5	76600.1	76290.2	75169.8	74521.8	73851	73102.8	72043.7	71565.7	70549.9	69957.6	68588.4	68041.5	66923	66360.9	65202.6
	460	63068.1	65543.5	67222.3	69645	71478.1	72829.8	73997	74949.2	76083.3	76860.2	76605	77461.6	77214.7	77360.8	77369.3	76586.7	76186.6	75878.3	74763.9	74119.4	73452.3	72708.1	71654.7	71179.4	70169	69579.9	68218.1	67674.1	66561.7	66002.6	64850.5
	[nm]	D09	X45
[nm]		470	471	472	473	474	475	476	477	478	479	480	481	482	483	484	485	486	487	488	489	490	491	492	493	494	495	496	497	498	499	500
	430	58129.9	60352.8	61965.3	64160.5	65945.3	67141.6	68298.3	69127.6	70230.3	70933.2	70598.2	71387.5	71196.2	71338.1	71245.2	70602.5	70187.1	69915.2	68955.8	68298.3	67707.8	66971.1	65995.3	65545.9	64670	64083.7	62838.3	62391.2	61332.8	60827.7	59694.3
	431	58297.2	60526.4	62143.5	64345	66135.1	67334.8	68494.8	69326.5	70432.3	71137.3	70801.3	71592.9	71401	71543.3	71450.2	70805.6	70389	70116.3	69154.1	68494.8	67902.6	67163.8	66185.2	65734.5	64856.1	64268	63019	62570.7	61509.3	61002.7	59866
	432	58887.6	61139.4	62772.9	64996.7	66804.9	68016.8	69188.5	70028.6	71145.7	71857.7	71518.3	72318	72124.2	72267.9	72173.8	71522.7	71101.9	70826.5	69854.5	69188.5	68590.3	67844	66855.5	66400.2	65512.9	64919	63657.3	63204.4	62132.2	61620.5	60472.3
	433	59493.6	61768.6	63418.9	65665.6	67492.3	68716.7	69900.5	70749.2	71877.8	72597.2	72254.3	73062.1	72866.4	73011.6	72916.6	72258.8	71833.6	71555.3	70573.4	69900.5	69296.1	68542.2	67543.5	67083.5	66187.1	65587	64312.4	63854.8	62771.6	62254.6	61094.6
	434	60625.9	62944.1	64625.9	66915.3	68776.8	70024.5	71230.9	72095.7	73245.8	73978.9	73629.4	74452.7	74253.1	74401.1	74304.3	73634	73200.7	72917.2	71916.5	71230.8	70614.9	69846.7	68829	68360.2	67446.7	66835.2	65536.3	65070.1	63966.3	63439.4	62257.4
	435	61630.8	63987.5	65697.1	68024.5	69916.8	71185.2	72411.6	73290.7	74459.8	75205.1	74849.9	75686.7	75483.9	75634.4	75535.9	74854.5	74414.1	74125.8	73108.6	72411.5	71785.4	71004.4	69969.8	69493.3	68564.7	67943.1	66622.6	66148.6	65026.5	64490.9	63289.3
	436	62037.1	64409.3	66130.2	68472.9	70377.8	71654.5	72888.9	73773.9	74950.7	75700.9	75343.3	76185.7	75981.6	76133	76033.9	75348	74904.7	74614.5	73590.5	72888.9	72258.7	71472.5	70431.1	69951.5	69016.7	68391	67061.9	66584.7	65455.2	64916.1	63706.6
	437	62968	65375.9	67122.6	69500.5	71433.9	72729.8	73982.7	74881	76075.5	76836.9	76474	77329	77121.8	77275.5	77174.9	76478.7	76028.7	75734.2	74694.9	73982.7	73343	72545.1	71488	71001.2	70052.4	69417.3	68068.2	67583.9	66437.5	65890.3	64662.6
	438	64272.4	66730.1	68513	70940.2	72913.7	74236.4	75515.3	76432.2	77651.4	78428.6	78058.1	78930.9	78719.4	78876.2	78773.6	78062.9	77603.7	77303	76242.2	75515.3	74862.3	74047.8	72968.9	72472	71503.6	70855.3	69478.2	68983.9	67813.7	67255.2	66002.1
	439	65837.4	68355	70181.3	72667.5	74689.1	76044	77354	78293.2	79542.1	80338.3	79958.8	80852.8	80636.1	80796.8	80691.7	79963.7	79493.3	79185.3	78098.6	77354	76685.2	75850.9	74745.7	74236.6	73244.6	72580.6	71170	70663.6	69465	68892.8	67609.2
	440	66195.1	68726.4	70562.6	73062.4	75094.9	76457.2	77774.3	78718.6	79974.3	80774.8	80393.2	81292.1	81074.3	81235.8	81130.1	80398.2	79925.2	79615.5	78523	77774.3	77101.8	76263	75151.8	74640	73642.6	72974.9	71556.7	71047.6	69842.4	69267.1	67976.5
	441	67409	69986.6	71856.5	74402.1	76471.9	77859.2	79200.5	80162.1	81440.8	82256	81867.4	82782.8	82560.9	82725.5	82617.8	81872.5	81390.8	81075.5	79962.9	79200.5	78515.7	77661.5	76529.9	76008.7	74993	74313.1	72868.9	72350.4	71123.1	70537.3	69223
	442	68293.2	70904.6	72799.1	75378	77475	78880.5	80239.4	81213.6	82509.1	83334.9	82941.3	83868.6	83643.9	83810.6	83701.5	82946.4	82458.4	82138.9	81011.7	80239.3	79545.6	78680.1	77533.7	77005.7	75976.7	75287.8	73824.7	73299.4	72056	71462.5	70131
	443	68834.1	71466.3	73375.7	75975.1	78088.7	79505.3	80874.9	81856.9	83162.6	83995	83598.2	84532.9	84306.4	84474.4	84364.5	83603.4	83111.5	82789.5	81653.4	80874.9	80175.6	79303.4	78147.8	77615.6	76578.5	75884.2	74409.4	73880	72626.8	72028.6	70686.5
	444	69325.9	71976.9	73900	76517.9	78646.6	80073.3	81452.8	82441.8	83756.8	84595.1	84195.6	85136.9	84908.8	85078	84967.3	84200.7	83705.3	83381.1	82236.8	81452.7	80748.5	79870	78706.2	78170.2	77125.6	76426.4	74941.1	74407.9	73145.7	72543.2	71191.6
	445	70489.9	73185.4	75140.7	77802.7	79967.1	81417.8	82820.4	83826	85163.1	86015.5	85609.2	86566.4	86334.4	86506.5	86393.9	85614.5	85110.8	84781	83617.6	82820.4	82104.3	81211	80027.7	79482.7	78420.6	77709.6	76199.3	75657.2	74373.8	73761.2	72386.9
	446	71284.3	74010.1	75987.5	78679.4	80868.2	82335.3	83753.7	84770.6	86122.8	86984.8	86573.9	87541.9	87307.3	87481.3	87367.5	86579.3	86069.9	85736.4	84559.9	83753.7	83029.5	82126.2	80929.5	80378.4	79304.3	78585.3	77058	76509.8	75211.9	74592.5	73202.6
	447	72407.9	75176.7	77185.3	79919.6	82142.9	83633.1	85073.9	86106.8	87480.3	88355.9	87938.6	88921.8	88683.5	88860.2	88744.6	87944	87426.6	87087.9	85892.8	85073.8	84338.2	83420.7	82205.2	81645.3	80554.3	79824	78272.7	77715.8	76397.5	75768.2	74356.5
	448	72769.3	75551.9	77570.5	80318.5	82552.9	84050.5	85498.5	86536.6	87917	88796.9	88377.5	89365.6	89126.1	89303.8	89187.5	88383	87862.9	87522.6	86321.5	85498.5	84759.2	83837.1	82615.5	82052.9	80956.4	80222.4	78663.4	78103.7	76778.8	76146.4	74727.6
	449	73821.8	76644.7	78692.4	81480.2	83746.9	85266.1	86735.1	87788.2	89188.5	90081.2	89655.7	90658.1	90415.2	90595.4	90477.5	89661.2	89133.7	88788.4	87570	86735	85985.1	85049.6	83810.4	83239.6	82127.3	81382.7	79801.1	79233.3	77889.3	77247.7	75808.4
	450	73125.2	75921.4	77949.9	80711.4	82956.7	84461.6	85916.7	86959.8	88346.9	89231.2	88809.7	89802.7	89562	89740.5	89623.7	88815.2	88292.7	87950.6	86743.7	85916.6	85173.7	84247.1	83019.5	82454.2	81352.3	80614.8	79048.1	78485.7	77154.3	76518.8	75093.1
	451	72922.3	75710.8	77733.6	80487.4	82726.5	84227.2	85678.3	86718.5	88101.8	88983.6	88563.3	89553.5	89313.5	89491.5	89375	88568.8	88047.7	87706.6	86503	85678.2	84937.4	84013.3	82789.2	82225.4	81126.6	80391.1	78828.7	78267.9	76940.2	76306.5	74884.7
	452	73335.9	76140.2	78174.5	80943.9	83195.7	84704.9	86164.2	87210.3	88601.5	89488.3	89065.6	90061.4	89820.1	89999.1	89881.9	89071.1	88547	88204	86993.6	86164.1	85419.1	84489.8	83258.7	82691.7	81586.7	80847	79275.8	78711.8	77376.6	76739.3	75309.4
	453	73159.6	75957.1	77986.5	80749.3	82995.7	84501.3	85957	87000.7	88388.5	89273.1	88851.5	89844.9	89604.1	89782.7	89665.8	88856.9	88334.1	87991.9	86784.4	85957	85213.8	84286.7	83058.5	82492.9	81390.6	80652.7	79085.2	78522.5	77190.5	76554.8	75128.4
	454	73024.4	75816.8	77842.4	80600.1	82842.3	84345.1	85798.2	86839.9	88225.2	89108.2	88687.3	89678.9	89438.6	89616.8	89500.2	88692.8	88170.9	87829.4	86624.1	85798.2	85056.3	84130.9	82905.1	82340.5	81240.2	80503.6	78939.1	78377.5	77047.9	76413.3	74989.6
	455	72845.3	75630.8	77651.5	80402.4	82639.1	84138.3	85587.8	86627	88008.8	88889.7	88469.8	89459	89219.2	89397	89280.7	88475.3	87954.7	87614	86411.6	85587.8	84847.7	83924.6	82701.8	82138.6	81041	80306.2	78745.5	78185.2	76859	76225.9	74805.7
	456	71419	74150	76131.1	78828.2	81021.1	82490.9	83912	84930.8	86285.6	87149.2	86737.6	87707.4	87472.4	87646.7	87532.6	86742.9	86232.6	85898.5	84719.7	83912	83186.4	82281.4	81082.5	80530.3	79454.2	78733.8	77203.7	76654.4	75354.1	74733.5	73341
	457	71395	74125.1	76105.5	78801.6	80993.8	82463.1	83883.8	84902.3	86256.6	87119.9	86708.4	87677.9	87442.9	87617.2	87503.1	86713.8	86203.6	85869.6	84691.2	83883.7	83158.4	82253.7	81055.2	80503.2	79427.5	78707.3	77177.7	76628.6	75328.7	74708.3	73316.3
	458	71078.4	73796.4	75768.1	78452.2	80634.7	82097.5	83511.8	84525.8	85874.1	86733.6	86323.9	87289.1	87055.2	87228.7	87115.1	86329.2	85821.3	85488.8	84315.7	83511.8	82789.7	81889	80695.8	80146.3	79075.3	78358.3	76835.5	76288.8	74994.7	74377	72991.2
	459	70249.8	72936.1	74884.8	77537.6	79694.7	81140.4	82538.3	83540.4	84873	85722.5	85317.6	86271.5	86040.3	86211.8	86099.6	85322.8	84820.8	84492.2	83332.7	82538.2	81824.6	80934.3	79755.1	79211.9	78153.4	77444.9	75939.8	75399.5	74120.4	73510	72140.3
	460	69832.9	72503.3	74440.4	77077.5	79221.8	80658.9	82048.5	83044.7	84369.4	85213.8	84811.3	85759.6	85529.8	85700.2	85588.7	84816.5	84317.5	83990.9	82838.3	82048.5	81339	80454.1	79281.8	78741.9	77689.7	76985.3	75489.2	74952.1	73680.6	73073.8	71712.2
	[nm]	D10	X46
[nm]		470	471	472	473	474	475	476	477	478	479	480	481	482	483	484	485	486	487	488	489	490	491	492	493	494	495	496	497	498	499	500
	430	5130.78	5279.5	5367.39	5514.52	5626.87	5691.24	5758.12	5802.29	5861.59	5918.87	5876	5926.98	5898.06	5905.63	5892.19	5836.15	5801.87	5784.81	5698.88	5652.76	5595.46	5544.68	5472.79	5434.27	5359.1	5326.15	5217.18	5189.82	5093.06	5057.2	4974.19
	431	5208.7	5359.67	5448.9	5598.27	5712.33	5777.67	5845.57	5890.41	5950.6	6008.76	5965.24	6016.99	5987.64	5995.32	5981.67	5924.78	5889.99	5872.66	5785.43	5738.6	5680.43	5628.88	5555.9	5516.8	5440.49	5407.04	5296.41	5268.63	5170.4	5134.01	5049.73
	432	5276.31	5429.25	5519.64	5670.94	5786.48	5852.67	5921.45	5966.87	6027.85	6086.76	6042.67	6095.1	6065.36	6073.15	6059.32	6001.69	5966.45	5948.89	5860.53	5813.1	5754.17	5701.95	5628.02	5588.41	5511.11	5477.23	5365.17	5337.03	5237.52	5200.65	5115.29
	433	5347.22	5502.22	5593.82	5747.15	5864.25	5931.32	6001.03	6047.06	6108.86	6168.56	6123.88	6177.01	6146.88	6154.76	6140.75	6082.35	6046.63	6028.84	5939.29	5891.22	5831.5	5778.58	5703.66	5663.51	5585.18	5550.84	5437.27	5408.75	5307.91	5270.55	5184.03
	434	5450.47	5608.45	5701.82	5858.12	5977.47	6045.85	6116.9	6163.82	6226.81	6287.67	6242.12	6296.28	6265.56	6273.6	6259.32	6199.79	6163.38	6145.25	6053.97	6004.97	5944.1	5890.15	5813.78	5772.87	5693.02	5658.01	5542.25	5513.18	5410.4	5372.31	5284.13
	435	5551.74	5712.66	5807.76	5966.96	6088.53	6158.18	6230.55	6278.34	6342.5	6404.49	6358.1	6413.26	6381.97	6390.16	6375.61	6314.98	6277.89	6259.42	6166.45	6116.54	6054.54	5999.59	5921.8	5880.12	5798.79	5763.14	5645.23	5615.62	5510.92	5472.12	5382.3
	436	5600.69	5763.03	5858.98	6019.58	6142.22	6212.48	6285.49	6333.71	6398.43	6460.97	6414.17	6469.82	6438.25	6446.51	6431.84	6370.67	6333.25	6314.62	6220.83	6170.48	6107.93	6052.5	5974.02	5931.98	5849.93	5813.96	5695.01	5665.14	5559.52	5520.38	5429.77
	437	5678.71	5843.31	5940.59	6103.44	6227.79	6299.02	6373.05	6421.94	6487.57	6550.97	6503.52	6559.94	6527.94	6536.32	6521.44	6459.41	6421.48	6402.59	6307.49	6256.44	6193.01	6136.81	6057.24	6014.61	5931.42	5894.95	5774.34	5744.05	5636.96	5597.28	5505.41
	438	5810.55	5978.97	6078.51	6245.13	6372.37	6445.26	6521	6571.02	6638.18	6703.05	6654.5	6712.23	6679.49	6688.06	6672.83	6609.37	6570.55	6551.22	6453.91	6401.68	6336.79	6279.28	6197.86	6154.24	6069.12	6031.8	5908.39	5877.4	5767.83	5727.22	5633.21
	439	5966.73	6139.68	6241.9	6413	6543.66	6618.51	6696.29	6747.66	6816.61	6883.23	6833.38	6892.66	6859.03	6867.83	6852.2	6787.03	6747.17	6727.32	6627.4	6573.76	6507.12	6448.07	6364.46	6319.67	6232.26	6193.94	6067.21	6035.39	5922.87	5881.17	5784.64
	440	6014.97	6189.32	6292.36	6464.85	6596.56	6672.01	6750.42	6802.21	6871.72	6938.88	6888.62	6948.38	6914.49	6923.36	6907.59	6841.9	6801.72	6781.71	6680.98	6626.9	6559.73	6500.2	6415.92	6370.76	6282.64	6244.01	6116.26	6084.18	5970.75	5928.72	5831.4
	441	6129.08	6306.73	6411.73	6587.49	6721.7	6798.59	6878.48	6931.25	7002.08	7070.51	7019.3	7080.2	7045.66	7054.7	7038.63	6971.69	6930.75	6910.36	6807.72	6752.62	6684.17	6623.51	6537.63	6491.62	6401.83	6362.46	6232.29	6199.6	6084.02	6041.19	5942.03
	442	6221.22	6401.55	6508.12	6686.52	6822.75	6900.79	6981.89	7035.45	7107.34	7176.81	7124.82	7186.64	7151.58	7160.75	7144.45	7076.5	7034.94	7014.25	6910.06	6854.13	6784.65	6723.08	6635.91	6589.21	6498.07	6458.11	6325.98	6292.8	6175.48	6132.01	6031.36
	443	6277.77	6459.74	6567.28	6747.3	6884.77	6963.52	7045.35	7099.4	7171.95	7242.05	7189.59	7251.96	7216.59	7225.84	7209.39	7140.82	7098.89	7078.01	6972.87	6916.44	6846.33	6784.2	6696.23	6649.1	6557.13	6516.82	6383.49	6350.01	6231.62	6187.75	6086.18
	444	6342.49	6526.33	6634.98	6816.86	6955.74	7035.31	7117.99	7172.59	7245.89	7316.71	7263.71	7326.73	7290.98	7300.34	7283.72	7214.44	7172.08	7150.98	7044.76	6987.74	6916.91	6854.14	6765.27	6717.65	6624.73	6584	6449.3	6415.47	6295.86	6251.54	6148.93
	445	6444.26	6631.05	6741.45	6926.24	7067.35	7148.2	7232.2	7287.68	7362.15	7434.11	7380.26	7444.29	7407.97	7417.48	7400.59	7330.2	7287.16	7265.72	7157.8	7099.86	7027.89	6964.11	6873.82	6825.44	6731.03	6689.65	6552.78	6518.41	6396.88	6351.85	6247.59
	446	6538.14	6727.66	6839.66	7027.15	7170.32	7252.34	7337.56	7393.85	7469.41	7542.41	7487.78	7552.74	7515.9	7525.54	7508.41	7436.99	7393.32	7371.57	7262.08	7203.3	7130.28	7065.57	6973.96	6924.88	6829.1	6787.11	6648.25	6613.38	6490.08	6444.39	6338.61
	447	6625.22	6817.26	6930.75	7120.74	7265.81	7348.92	7435.29	7492.33	7568.89	7642.87	7587.5	7653.33	7616	7625.77	7608.41	7536.04	7491.79	7469.75	7358.8	7299.24	7225.24	7159.67	7066.85	7017.11	6920.05	6877.5	6736.79	6701.45	6576.51	6530.22	6423.03
	448	6687.36	6881.2	6995.76	7187.52	7333.96	7417.85	7505.02	7562.6	7639.88	7714.55	7658.67	7725.11	7687.43	7697.29	7679.77	7606.72	7562.05	7539.81	7427.81	7367.7	7293.01	7226.83	7133.13	7082.92	6984.95	6942	6799.97	6764.31	6638.2	6591.47	6483.27
	449	6773.75	6970.09	7086.13	7280.38	7428.7	7513.68	7601.98	7660.29	7738.58	7814.21	7757.61	7824.91	7786.74	7796.73	7778.98	7704.99	7659.74	7637.21	7523.77	7462.88	7387.23	7320.19	7225.28	7174.42	7075.19	7031.68	6887.82	6851.69	6723.95	6676.62	6567.02
	450	6720.87	6915.68	7030.82	7223.54	7370.71	7455.03	7542.64	7600.5	7678.17	7753.21	7697.05	7763.83	7725.95	7735.86	7718.25	7644.84	7599.95	7577.59	7465.04	7404.62	7329.56	7263.04	7168.87	7118.42	7019.96	6976.79	6834.05	6798.21	6671.46	6624.5	6515.76
	451	6707.98	6902.41	7017.32	7209.68	7356.57	7440.72	7528.16	7585.91	7663.43	7738.33	7682.28	7748.93	7711.13	7721.02	7703.44	7630.17	7585.37	7563.05	7450.71	7390.41	7315.49	7249.11	7155.12	7104.76	7006.48	6963.4	6820.94	6785.16	6658.66	6611.79	6503.26
	452	6719.56	6914.34	7029.45	7222.14	7369.28	7453.57	7541.17	7599.02	7676.67	7751.7	7695.55	7762.32	7724.45	7734.36	7716.75	7643.36	7598.47	7576.12	7463.59	7403.18	7328.13	7261.63	7167.48	7117.03	7018.59	6975.43	6832.72	6796.88	6670.16	6623.21	6514.49
	453	6700.08	6894.28	7009.06	7201.19	7347.91	7431.96	7519.3	7576.98	7654.41	7729.22	7673.23	7739.81	7702.05	7711.93	7694.37	7621.19	7576.44	7554.15	7441.94	7381.71	7306.88	7240.57	7146.69	7096.39	6998.24	6955.21	6812.91	6777.17	6650.82	6604	6495.6
	454	6669.98	6863.31	6977.57	7168.84	7314.9	7398.57	7485.52	7542.94	7620.02	7694.5	7638.76	7705.03	7667.44	7677.28	7659.8	7586.95	7542.4	7520.21	7408.51	7348.55	7274.05	7208.04	7114.58	7064.51	6966.79	6923.96	6782.3	6746.72	6620.94	6574.33	6466.42
	455	6638.22	6830.63	6944.35	7134.71	7280.07	7363.34	7449.88	7507.03	7583.74	7657.86	7602.39	7668.35	7630.94	7640.73	7623.33	7550.83	7506.49	7484.4	7373.23	7313.56	7239.42	7173.72	7080.71	7030.88	6933.62	6890.99	6750.01	6714.6	6589.42	6543.03	6435.63
	456	6460.48	6647.75	6758.42	6943.68	7085.15	7166.19	7250.41	7306.03	7380.69	7452.82	7398.84	7463.03	7426.62	7436.15	7419.22	7348.66	7305.5	7284.01	7175.82	7117.74	7045.59	6981.65	6891.13	6842.63	6747.98	6706.49	6569.28	6534.82	6412.99	6367.84	6263.32
	457	6419.66	6605.74	6715.71	6899.8	7040.38	7120.91	7204.59	7259.86	7334.05	7405.73	7352.09	7415.87	7379.69	7389.16	7372.34	7302.22	7259.34	7237.98	7130.47	7072.76	7001.07	6937.53	6847.58	6799.39	6705.34	6664.11	6527.77	6493.53	6372.46	6327.6	6223.74
	458	6363.47	6547.92	6656.93	6839.41	6978.75	7058.58	7141.53	7196.32	7269.86	7340.91	7287.73	7350.96	7315.1	7324.48	7307.81	7238.31	7195.8	7174.63	7068.06	7010.85	6939.79	6876.81	6787.65	6739.87	6646.65	6605.78	6470.63	6436.69	6316.69	6272.22	6169.26
	459	6228.05	6408.57	6515.27	6693.86	6830.24	6908.37	6989.55	7043.17	7115.15	7184.69	7132.65	7194.53	7159.43	7168.61	7152.29	7084.27	7042.67	7021.95	6917.65	6861.66	6792.1	6730.46	6643.2	6596.44	6505.2	6465.2	6332.93	6299.71	6182.26	6138.74	6037.98
	460	6146.84	6325.01	6430.31	6606.58	6741.18	6818.29	6898.42	6951.33	7022.37	7091	7039.64	7100.72	7066.08	7075.14	7059.03	6991.9	6950.84	6930.39	6827.45	6772.19	6703.54	6642.7	6556.58	6510.43	6420.38	6380.9	6250.35	6217.57	6101.65	6058.7	5959.25
	[nm]	D11	X47
[nm]		470	471	472	473	474	475	476	477	478	479	480	481	482	483	484	485	486	487	488	489	490	491	492	493	494	495	496	497	498	499	500
	430	5256.02	5397.51	5469.5	5619.01	5719.19	5775.2	5824.53	5876.58	5940.18	5976.01	5916.75	5970.46	5933.33	5949.92	5942.15	5882.86	5841.09	5818.91	5742.24	5689.74	5640.72	5584.04	5512.62	5478.38	5409.85	5368.76	5269.67	5247.6	5159.05	5118.27	5037.4
	431	5282.1	5424.29	5496.64	5646.89	5747.57	5803.85	5853.42	5905.74	5969.65	6005.66	5946.11	6000.08	5962.77	5979.45	5971.63	5912.05	5870.08	5847.78	5770.73	5717.97	5668.71	5611.74	5539.97	5505.56	5436.69	5395.4	5295.81	5273.63	5184.65	5143.67	5062.4
	432	5336.6	5480.25	5553.34	5705.15	5806.87	5863.73	5913.81	5966.67	6031.24	6067.62	6007.46	6061.98	6024.28	6041.14	6033.24	5973.04	5930.64	5908.11	5830.26	5776.96	5727.19	5669.64	5597.12	5562.36	5492.78	5451.06	5350.45	5328.04	5238.14	5196.73	5114.63
	433	5393.35	5538.53	5612.4	5765.82	5868.62	5926.09	5976.71	6030.12	6095.38	6132.14	6071.34	6126.45	6088.35	6105.38	6097.4	6036.56	5993.71	5970.94	5892.26	5838.4	5788.1	5729.93	5656.65	5621.51	5551.2	5509.03	5407.35	5384.7	5293.85	5252	5169.02
	434	5492.89	5640.74	5715.98	5872.23	5976.93	6035.46	6087.01	6141.41	6207.87	6245.31	6183.39	6239.52	6200.71	6218.06	6209.93	6147.97	6104.32	6081.14	6001.01	5946.15	5894.92	5835.68	5761.04	5725.26	5653.65	5610.7	5507.14	5484.08	5391.54	5348.93	5264.41
	435	5581.48	5731.72	5808.17	5966.94	6073.33	6132.8	6185.18	6240.46	6308	6346.04	6283.12	6340.15	6300.72	6318.35	6310.09	6247.13	6202.78	6179.22	6097.8	6042.05	5990	5929.8	5853.96	5817.6	5744.83	5701.2	5595.96	5572.53	5478.5	5435.2	5349.32
	436	5615.3	5766.46	5843.37	6003.11	6110.14	6169.97	6222.67	6278.28	6346.23	6384.5	6321.2	6378.57	6338.91	6356.64	6348.33	6284.99	6240.37	6216.67	6134.75	6078.67	6026.3	5965.74	5889.44	5852.86	5779.65	5735.75	5629.88	5606.3	5511.7	5468.14	5381.74
	437	5700.18	5853.62	5931.69	6093.84	6202.49	6263.22	6316.72	6373.18	6442.15	6481	6416.74	6474.98	6434.71	6452.71	6444.28	6379.98	6334.69	6310.63	6227.47	6170.54	6117.39	6055.91	5978.45	5941.32	5867	5822.44	5714.97	5691.04	5595.01	5550.78	5463.08
	438	5782.34	5937.99	6017.19	6181.68	6291.89	6353.5	6407.77	6465.04	6535.01	6574.42	6509.24	6568.32	6527.47	6545.73	6537.17	6471.95	6426	6401.59	6317.24	6259.49	6205.57	6143.2	6064.63	6026.96	5951.57	5906.37	5797.35	5773.07	5675.66	5630.8	5541.83
	439	5919.91	6079.27	6160.35	6328.75	6441.59	6504.66	6560.22	6618.86	6690.48	6730.84	6664.1	6724.59	6682.77	6701.46	6692.7	6625.93	6578.88	6553.9	6467.54	6408.41	6353.2	6289.36	6208.91	6170.35	6093.17	6046.89	5935.28	5910.42	5810.69	5764.76	5673.68
	440	5961.33	6121.8	6203.45	6373.03	6486.66	6550.17	6606.12	6665.17	6737.29	6777.93	6710.73	6771.64	6729.52	6748.35	6739.53	6672.28	6624.91	6599.75	6512.79	6453.25	6397.66	6333.36	6252.36	6213.52	6135.8	6089.2	5976.8	5951.77	5851.35	5805.09	5713.37
	441	6054.93	6217.92	6300.85	6473.09	6588.5	6653.02	6709.84	6769.82	6843.08	6884.35	6816.09	6877.96	6835.18	6854.3	6845.35	6777.04	6728.93	6703.37	6615.04	6554.57	6498.1	6432.8	6350.52	6311.08	6232.14	6184.8	6070.64	6045.22	5943.22	5896.24	5803.08
	442	6114.4	6278.99	6362.74	6536.67	6653.21	6718.36	6775.75	6836.31	6910.29	6951.96	6883.04	6945.51	6902.32	6921.62	6912.58	6843.61	6795.02	6769.21	6680.02	6618.94	6561.93	6495.98	6412.9	6373.07	6293.35	6245.55	6130.27	6104.6	6001.59	5954.15	5860.08
	443	6154.02	6319.68	6403.97	6579.03	6696.32	6761.9	6819.65	6880.61	6955.07	6997.01	6927.64	6990.52	6947.04	6966.48	6957.37	6887.95	6839.05	6813.08	6723.3	6661.84	6604.45	6538.07	6454.45	6414.37	6334.13	6286.02	6169.99	6144.16	6040.48	5992.73	5898.05
	444	6187.43	6353.98	6438.73	6614.74	6732.67	6798.6	6856.67	6917.95	6992.82	7034.99	6965.24	7028.46	6984.75	7004.29	6995.14	6925.34	6876.17	6850.06	6759.8	6698	6640.3	6573.56	6489.49	6449.18	6368.51	6320.14	6203.48	6177.51	6073.27	6025.26	5930.06
	445	6276.23	6445.17	6531.14	6709.67	6829.3	6896.17	6955.08	7017.24	7093.18	7135.96	7065.21	7129.34	7085	7104.82	7095.53	7024.74	6974.86	6948.37	6856.81	6794.13	6735.6	6667.91	6582.63	6541.74	6459.91	6410.85	6292.52	6266.17	6160.44	6111.74	6015.17
	446	6334.65	6505.16	6591.93	6772.13	6892.87	6960.36	7019.81	7082.56	7159.2	7202.38	7130.97	7195.69	7150.94	7170.95	7161.58	7090.12	7039.78	7013.04	6920.64	6857.37	6798.29	6729.97	6643.89	6602.63	6520.04	6470.52	6351.09	6324.49	6217.77	6168.62	6071.16
	447	6391.34	6563.39	6650.93	6832.74	6954.56	7022.66	7082.64	7145.95	7223.28	7266.84	7194.79	7260.1	7214.95	7235.13	7225.67	7153.58	7102.79	7075.81	6982.58	6918.74	6859.14	6790.21	6703.36	6661.73	6578.4	6528.43	6407.93	6381.1	6273.43	6223.83	6125.5
	448	6421.2	6594.05	6682	6864.66	6987.05	7055.47	7115.73	7179.33	7257.03	7300.79	7228.41	7294.02	7248.65	7268.93	7259.43	7187	7135.98	7108.87	7015.2	6951.06	6891.19	6821.93	6734.68	6692.85	6609.13	6558.93	6437.87	6410.91	6302.73	6252.91	6154.12
	449	6493.3	6668.09	6757.02	6941.74	7065.5	7134.69	7195.63	7259.94	7338.5	7382.76	7309.57	7375.91	7330.04	7350.54	7340.94	7267.69	7216.1	7188.69	7093.96	7029.11	6968.56	6898.52	6810.29	6768	6683.34	6632.57	6510.15	6482.89	6373.5	6323.12	6223.21
	450	6415.4	6588.09	6675.96	6858.46	6980.73	7049.09	7109.3	7172.84	7250.46	7294.19	7221.87	7287.42	7242.1	7262.36	7252.87	7180.5	7129.52	7102.44	7008.86	6944.78	6884.96	6815.76	6728.59	6686.8	6603.16	6553	6432.05	6405.11	6297.04	6247.26	6148.55
	451	6355.41	6526.49	6613.54	6794.33	6915.46	6983.18	7042.82	7105.77	7182.67	7225.99	7154.34	7219.28	7174.38	7194.45	7185.05	7113.36	7062.86	7036.03	6943.32	6879.84	6820.58	6752.03	6665.67	6624.28	6541.41	6491.73	6371.91	6345.22	6238.16	6188.84	6091.06
	452	6364.43	6535.75	6622.92	6803.97	6925.28	6993.09	7052.82	7115.86	7192.87	7236.25	7164.5	7229.53	7184.57	7204.67	7195.25	7123.46	7072.89	7046.02	6953.18	6889.61	6830.26	6761.62	6675.14	6633.68	6550.7	6500.94	6380.95	6354.23	6247.01	6197.63	6099.71
	453	6310.1	6479.95	6566.38	6745.88	6866.15	6933.39	6992.61	7055.11	7131.46	7174.47	7103.33	7167.81	7123.23	7143.16	7133.82	7062.64	7012.5	6985.87	6893.82	6830.79	6771.95	6703.89	6618.15	6577.04	6494.77	6445.44	6326.47	6299.98	6193.68	6144.72	6047.63
	454	6272.07	6440.9	6526.81	6705.23	6824.77	6891.6	6950.47	7012.59	7088.48	7131.23	7060.52	7124.61	7080.3	7100.11	7090.83	7020.08	6970.24	6943.76	6852.27	6789.62	6731.13	6663.49	6578.26	6537.41	6455.63	6406.6	6288.35	6262.01	6156.35	6107.69	6011.18
	455	6218.21	6385.6	6470.77	6647.65	6766.17	6832.43	6890.79	6952.38	7027.61	7070	6999.9	7063.43	7019.51	7039.14	7029.94	6959.8	6910.39	6884.14	6793.43	6731.32	6673.34	6606.27	6521.78	6481.27	6400.2	6351.59	6234.35	6208.24	6103.49	6055.24	5959.57
	456	6035.12	6197.58	6280.24	6451.92	6566.95	6631.25	6687.89	6747.67	6820.69	6861.82	6793.79	6855.46	6812.82	6831.88	6822.95	6754.87	6706.92	6681.44	6593.4	6533.12	6476.85	6411.75	6329.75	6290.44	6211.75	6164.57	6050.78	6025.45	5923.78	5876.95	5784.09
	457	5982.98	6144.03	6225.98	6396.17	6510.21	6573.96	6630.11	6689.37	6761.76	6802.54	6735.09	6796.22	6753.96	6772.85	6764	6696.51	6648.97	6623.71	6536.44	6476.68	6420.88	6356.36	6275.06	6236.09	6158.08	6111.31	5998.5	5973.39	5872.59	5826.17	5734.12
	458	5896.83	6055.57	6136.33	6304.08	6416.47	6479.3	6534.65	6593.05	6664.4	6704.59	6638.12	6698.37	6656.71	6675.33	6666.61	6600.09	6553.24	6528.34	6442.32	6383.43	6328.44	6264.84	6184.71	6146.3	6069.42	6023.31	5912.14	5887.38	5788.04	5742.29	5651.56
	459	5763.63	5918.78	5997.72	6161.68	6271.53	6332.95	6387.04	6444.12	6513.86	6553.15	6488.17	6547.06	6506.35	6524.55	6516.02	6451.01	6405.21	6380.88	6296.8	6239.23	6185.49	6123.32	6045.01	6007.46	5932.32	5887.26	5778.59	5754.39	5657.3	5612.58	5523.9
	460	5672.9	5825.6	5903.3	6064.68	6172.8	6233.25	6286.49	6342.68	6411.32	6449.98	6386.03	6444	6403.92	6421.83	6413.44	6349.45	6304.37	6280.43	6197.67	6141.01	6088.11	6026.93	5949.84	5912.89	5838.93	5794.58	5687.62	5663.8	5568.24	5524.22	5436.94
	[nm]	D12	X48
[nm]		470	471	472	473	474	475	476	477	478	479	480	481	482	483	484	485	486	487	488	489	490	491	492	493	494	495	496	497	498	499	500
	430	6682.49	6870.17	7002.66	7193.02	7339.87	7434.74	7518.54	7575.06	7669.54	7718.97	7663.96	7736.79	7704.98	7702.11	7687.05	7618.93	7569.1	7532.48	7431.63	7367.04	7290.4	7223.65	7108.48	7064.35	6955.47	6911.32	6777.97	6730.84	6615.59	6562.65	6441.32
	431	6790.7	6981.41	7116.05	7309.49	7458.72	7555.13	7640.29	7697.72	7793.73	7843.97	7788.07	7862.07	7829.75	7826.83	7811.53	7742.3	7691.66	7654.46	7551.97	7486.33	7408.46	7340.62	7223.59	7178.74	7068.1	7023.24	6887.73	6839.84	6722.72	6668.92	6545.63
	432	6889.91	7083.41	7220.01	7416.28	7567.69	7665.5	7751.91	7810.18	7907.6	7958.56	7901.85	7976.93	7944.14	7941.17	7925.65	7855.42	7804.03	7766.29	7662.3	7595.71	7516.69	7447.87	7329.13	7283.62	7171.36	7125.84	6988.35	6939.76	6820.93	6766.35	6641.26
	433	6989.77	7186.07	7324.66	7523.77	7677.38	7776.6	7864.26	7923.38	8022.21	8073.91	8016.37	8092.55	8059.28	8056.27	8040.52	7969.27	7917.14	7878.85	7773.36	7705.8	7625.64	7555.81	7435.35	7389.18	7275.3	7229.12	7089.64	7040.35	6919.79	6864.42	6737.51
	434	7140.62	7341.16	7482.73	7686.14	7843.06	7944.43	8033.98	8094.37	8195.33	8248.16	8189.37	8267.19	8233.21	8230.13	8214.05	8141.25	8088	8048.88	7941.12	7872.09	7790.2	7718.88	7595.81	7548.65	7432.31	7385.13	7242.64	7192.28	7069.13	7012.56	6882.91
	435	7277.81	7482.21	7626.5	7833.82	7993.75	8097.07	8188.34	8249.9	8352.79	8406.63	8346.72	8426.04	8391.4	8388.26	8371.87	8297.68	8243.4	8203.53	8093.69	8023.35	7939.88	7867.18	7741.76	7693.69	7575.11	7527.03	7381.8	7330.47	7204.95	7147.29	7015.16
	436	7338.32	7544.41	7689.9	7898.94	8060.21	8164.38	8256.41	8318.48	8422.23	8476.52	8416.11	8496.08	8461.15	8458	8441.46	8366.66	8311.93	8271.73	8160.98	8090.05	8005.89	7932.58	7806.11	7757.65	7638.08	7589.6	7443.16	7391.41	7264.85	7206.71	7073.48
	437	7447.9	7657.07	7804.74	8016.9	8180.57	8286.31	8379.71	8442.7	8548	8603.1	8541.79	8622.96	8587.51	8584.3	8567.52	8491.6	8436.05	8395.25	8282.85	8210.86	8125.44	8051.04	7922.69	7873.49	7752.15	7702.94	7554.31	7501.79	7373.34	7314.33	7179.11
	438	7643.85	7858.52	8010.07	8227.82	8395.79	8504.31	8600.17	8664.82	8772.89	8829.44	8766.51	8849.82	8813.44	8810.15	8792.93	8715	8658	8616.12	8500.76	8426.88	8339.21	8262.86	8131.12	8080.64	7956.1	7905.6	7753.06	7699.15	7567.32	7506.76	7367.98
	439	7842.56	8062.81	8218.3	8441.71	8614.06	8725.39	8823.74	8890.07	9000.96	9058.97	8994.41	9079.88	9042.55	9039.18	9021.51	8941.56	8883.08	8840.11	8721.75	8645.94	8556	8477.66	8342.5	8290.7	8162.93	8111.11	7954.61	7899.3	7764.04	7701.91	7559.52
	440	7899.55	8121.4	8278.02	8503.05	8676.65	8788.79	8887.86	8954.67	9066.36	9124.8	9059.77	9145.86	9108.26	9104.86	9087.06	9006.53	8947.62	8904.34	8785.12	8708.77	8618.17	8539.26	8403.12	8350.95	8222.24	8170.05	8012.41	7956.7	7820.46	7757.87	7614.45
	441	8064.92	8291.41	8451.31	8681.05	8858.28	8972.78	9073.91	9142.13	9256.15	9315.82	9249.42	9337.32	9298.93	9295.46	9277.29	9195.08	9134.93	9090.75	8969.03	8891.08	8798.59	8718.02	8579.03	8525.76	8394.36	8341.08	8180.14	8123.27	7984.17	7920.28	7773.85
	442	8183.88	8413.72	8575.98	8809.11	8988.96	9105.14	9207.77	9276.99	9392.7	9453.24	9385.87	9475.06	9436.1	9432.58	9414.14	9330.72	9269.68	9224.85	9101.34	9022.23	8928.38	8846.63	8705.59	8651.53	8518.19	8464.13	8300.81	8243.1	8101.95	8037.11	7888.53
	443	8264.48	8496.58	8660.44	8895.86	9077.48	9194.8	9298.44	9368.34	9485.19	9546.33	9478.3	9568.37	9529.03	9525.47	9506.85	9422.6	9360.97	9315.69	9190.97	9111.08	9016.3	8933.75	8791.32	8736.73	8602.08	8547.48	8382.56	8324.28	8181.74	8116.26	7966.22
	444	8346.78	8581.19	8746.68	8984.45	9167.87	9286.37	9391.04	9461.63	9579.65	9641.39	9572.68	9663.65	9623.92	9620.33	9601.52	9516.43	9454.19	9408.46	9282.49	9201.81	9106.09	9022.71	8878.86	8823.73	8687.74	8632.6	8466.03	8407.17	8263.21	8197.08	8045.54
	445	8503.27	8742.08	8910.67	9152.9	9339.76	9460.47	9567.11	9639.03	9759.26	9822.16	9752.16	9844.83	9804.36	9800.7	9781.54	9694.86	9631.44	9584.86	9456.53	9374.33	9276.82	9191.88	9045.33	8989.17	8850.62	8794.45	8624.76	8564.79	8418.14	8350.77	8196.39
	446	8634.61	8877.11	9048.3	9294.27	9484.02	9606.6	9714.88	9787.91	9910	9973.87	9902.79	9996.89	9955.8	9952.08	9932.63	9844.6	9780.21	9732.9	9602.59	9519.13	9420.11	9333.86	9185.04	9128.01	8987.33	8930.29	8757.98	8697.09	8548.16	8479.76	8322.99
	447	8759.91	9005.92	9179.6	9429.14	9621.65	9746	9855.86	9929.95	10053.8	10118.6	10046.5	10142	10100.3	10096.5	10076.8	9987.46	9922.13	9874.14	9741.94	9657.26	9556.8	9469.3	9318.33	9260.47	9117.75	9059.88	8885.07	8823.29	8672.21	8602.81	8443.77
	448	8830.08	9078.06	9253.13	9504.67	9698.72	9824.07	9934.81	10009.5	10134.3	10199.7	10127	10223.2	10181.2	10177.4	10157.5	10067.5	10001.6	9953.23	9819.97	9734.62	9633.36	9545.15	9392.97	9334.65	9190.78	9132.45	8956.24	8893.97	8741.67	8671.72	8511.4
	449	8973.87	9225.89	9403.81	9659.44	9856.65	9984.05	10096.6	10172.5	10299.4	10365.7	10291.9	10389.7	10347	10343.1	10322.9	10231.4	10164.5	10115.3	9979.88	9893.14	9790.22	9700.58	9545.93	9486.65	9340.45	9281.16	9102.08	9038.8	8884.02	8812.93	8650
	450	8899.39	9149.33	9325.77	9579.28	9774.85	9901.19	10012.8	10088.1	10213.9	10279.7	10206.5	10303.5	10261.1	10257.3	10237.2	10146.5	10080.1	10031.4	9897.06	9811.04	9708.98	9620.08	9466.71	9407.93	9262.93	9204.14	9026.54	8963.78	8810.3	8739.79	8578.22
	451	8881.33	9130.75	9306.84	9559.84	9755.01	9881.09	9992.47	10067.6	10193.2	10258.9	10185.7	10282.5	10240.3	10236.4	10216.4	10125.9	10059.7	10011	9876.97	9791.12	9689.27	9600.55	9447.49	9388.83	9244.13	9185.45	9008.22	8945.59	8792.41	8722.05	8560.8
	452	8921.4	9171.95	9348.84	9602.97	9799.03	9925.68	10037.6	10113	10239.2	10305.1	10231.7	10328.9	10286.5	10282.6	10262.5	10171.6	10105.1	10056.2	9921.54	9835.3	9732.99	9643.87	9490.12	9431.2	9285.84	9226.9	9048.87	8985.95	8832.09	8761.41	8599.43
	453	8896.91	9146.78	9323.17	9576.61	9772.13	9898.43	10010	10085.3	10211	10276.9	10203.6	10300.6	10258.2	10254.4	10234.4	10143.7	10077.3	10028.6	9894.3	9808.3	9706.27	9617.4	9464.07	9405.31	9260.35	9201.57	9024.03	8961.29	8807.84	8737.36	8575.83
	454	8876.67	9125.96	9301.96	9554.82	9749.89	9875.91	9987.23	10062.3	10187.8	10253.5	10180.4	10277.1	10234.9	10231.1	10211.1	10120.6	10054.4	10005.8	9871.79	9785.99	9684.19	9595.52	9442.54	9383.91	9239.28	9180.64	9003.5	8940.9	8787.8	8717.47	8556.31
	455	8834.57	9082.68	9257.84	9509.51	9703.65	9829.07	9939.86	10014.6	10139.5	10204.8	10132.1	10228.4	10186.4	10182.5	10162.6	10072.6	10006.7	9958.3	9824.97	9739.57	9638.26	9550.01	9397.75	9339.4	9195.46	9137.09	8960.8	8898.49	8746.12	8676.13	8515.73
	456	8616.51	8858.5	9029.33	9274.79	9464.14	9586.46	9694.52	9767.39	9889.22	9952.96	9882.03	9975.94	9934.92	9931.21	9911.8	9823.96	9759.71	9712.5	9582.46	9499.17	9400.36	9314.29	9165.79	9108.88	8968.49	8911.56	8739.62	8678.85	8530.24	8461.98	8305.54
	457	8555.97	8796.25	8965.89	9209.62	9397.64	9519.1	9626.4	9698.77	9819.74	9883.03	9812.6	9905.84	9865.12	9861.44	9842.16	9754.94	9691.13	9644.26	9515.13	9432.43	9334.31	9248.84	9101.39	9044.88	8905.48	8848.95	8678.21	8617.87	8470.31	8402.52	8247.18
	458	8473.6	8711.58	8879.58	9120.96	9307.17	9427.47	9533.73	9605.4	9725.21	9787.89	9718.14	9810.48	9770.15	9766.5	9747.42	9661.03	9597.84	9551.42	9423.53	9341.63	9244.45	9159.81	9013.77	8957.81	8819.75	8763.77	8594.67	8534.91	8388.77	8321.64	8167.79
	459	8314.27	8547.77	8712.62	8949.46	9132.17	9250.21	9354.47	9424.79	9542.35	9603.85	9535.41	9626.02	9586.45	9582.87	9564.14	9479.38	9417.37	9371.82	9246.35	9165.98	9070.63	8987.58	8844.29	8789.37	8653.91	8598.98	8433.07	8374.43	8231.04	8165.17	8014.22
	460	8207.48	8437.98	8600.71	8834.51	9014.88	9131.39	9234.32	9303.74	9419.78	9480.5	9412.93	9502.38	9463.31	9459.78	9441.29	9357.62	9296.42	9251.45	9127.58	9048.25	8954.12	8872.14	8730.69	8676.48	8542.76	8488.53	8324.75	8266.87	8125.31	8060.29	7911.28
	[nm]	E01	X49
[nm]		470	471	472	473	474	475	476	477	478	479	480	481	482	483	484	485	486	487	488	489	490	491	492	493	494	495	496	497	498	499	500
	430	14188.1	14618	14899.9	15338.7	15655.4	15891	16081.8	16272.5	16479.7	16640.4	16533.6	16742.9	16695.3	16735.7	16720.8	16603.4	16521.5	16486.1	16278.8	16147	16035.3	15891.6	15695.7	15623.3	15426.5	15329.2	15055.1	14979.2	14717.5	14627.7	14403.9
	431	14085.3	14512.1	14791.9	15227.6	15542	15775.8	15965.3	16154.6	16360.3	16519.8	16413.8	16621.6	16574.4	16614.4	16599.7	16483.1	16401.9	16366.7	16160.9	16030	15919.2	15776.5	15582	15510.2	15314.7	15218.2	14946	14870.7	14610.9	14521.7	14299.6
	432	13774.6	14191.9	14465.6	14891.7	15199.2	15427.8	15613.1	15798.2	15999.4	16155.4	16051.7	16254.9	16208.7	16247.9	16233.5	16119.4	16040	16005.6	15804.4	15676.4	15568	15428.4	15238.2	15168	14976.8	14882.4	14616.3	14542.6	14288.5	14201.4	13984.1
	433	13914.4	14336	14612.4	15042.8	15353.4	15584.4	15771.6	15958.5	16161.8	16319.3	16214.6	16419.9	16373.2	16412.8	16398.2	16283	16202.8	16168.1	15964.8	15835.5	15726	15585	15392.9	15321.9	15128.8	15033.5	14764.7	14690.2	14433.6	14345.5	14126
	434	14247.5	14679.1	14962.2	15402.9	15720.9	15957.4	16149.1	16340.6	16548.7	16710	16602.8	16812.9	16765.1	16805.7	16790.8	16672.8	16590.7	16555.1	16346.9	16214.6	16102.4	15958.1	15761.3	15688.7	15491	15393.3	15118.1	15041.9	14779.1	14688.9	14464.2
	435	14548.7	14989.5	15278.6	15728.6	16053.3	16294.8	16490.6	16686.1	16898.6	17063.3	16953.8	17168.4	17119.6	17161	17145.8	17025.4	16941.5	16905.1	16692.6	16557.4	16442.9	16295.5	16094.6	16020.4	15818.5	15718.8	15437.7	15359.9	15091.5	14999.5	14770
	436	14700.1	15145.5	15437.6	15892.3	16220.4	16464.4	16662.2	16859.7	17074.4	17240.9	17130.3	17347.1	17297.8	17339.6	17324.2	17202.5	17117.8	17081.1	16866.3	16729.7	16614	16465.1	16262.1	16187.1	15983.2	15882.4	15598.4	15519.8	15248.6	15155.6	14923.7
	437	14990.4	15444.6	15742.5	16206.1	16540.8	16789.6	16991.3	17192.7	17411.6	17581.4	17468.6	17689.7	17639.4	17682.1	17666.4	17542.3	17455.8	17418.4	17199.4	17060.1	16942.1	16790.3	16583.3	16506.8	16298.8	16196.1	15906.5	15826.3	15549.8	15454.9	15218.5
	438	15341.9	15806.7	16111.5	16586	16928.5	17183.2	17389.6	17595.7	17819.8	17993.5	17878.1	18104.4	18052.9	18096.6	18080.5	17953.5	17865	17826.8	17602.6	17460	17339.3	17183.9	16972	16893.8	16680.9	16575.7	16279.3	16197.3	15914.3	15817.2	15575.2
	439	15773	16250.9	16564.3	17052.2	17404.3	17666.1	17878.3	18090.2	18320.6	18499.2	18380.5	18613.2	18560.3	18605.2	18588.6	18458.1	18367.1	18327.7	18097.3	17950.7	17826.6	17666.8	17449	17368.6	17149.7	17041.6	16736.9	16652.5	16361.5	16261.7	16012.9
	440	15945.3	16428.4	16745.2	17238.4	17594.3	17859	18073.5	18287.8	18520.7	18701.2	18581.2	18816.4	18763	18808.3	18791.6	18659.6	18567.7	18527.9	18294.9	18146.8	18021.3	17859.7	17639.5	17558.2	17337	17227.7	16919.6	16834.3	16540.2	16439.3	16187.8
	441	16235	16726.9	17049.5	17551.6	17914	18183.5	18401.9	18620.1	18857.2	19041	18918.9	19158.4	19103.9	19150.1	19133.1	18998.7	18905.1	18864.6	18627.4	18476.5	18348.7	18184.3	17960.1	17877.3	17652	17540.7	17227.1	17140.2	16840.8	16738	16482
	442	16501.7	17001.7	17329.5	17839.9	18208.3	18482.2	18704.2	18926	19167	19353.8	19229.7	19473.1	19417.7	19464.7	19447.4	19310.8	19215.6	19174.4	18933.3	18780	18650.1	18483	18255.1	18171	17942	17828.9	17510.1	17421.8	17117.4	17013	16752.7
	443	16661.3	17166.1	17497.2	18012.5	18384.5	18661	18885.2	19109	19352.4	19541	19415.7	19661.4	19605.6	19653	19635.5	19497.6	19401.5	19359.9	19116.5	18961.7	18830.6	18661.8	18431.7	18346.8	18115.5	18001.3	17679.4	17590.3	17283	17177.6	16914.8
	444	16822.3	17332	17666.3	18186.6	18562.1	18841.3	19067.6	19293.7	19539.4	19729.9	19603.3	19851.4	19795	19842.9	19825.3	19686	19589	19547	19301.2	19144.9	19012.5	18842.1	18609.8	18524	18290.6	18175.3	17850.3	17760.3	17450	17343.5	17078.2
	445	17123.8	17642.6	17982.9	18512.5	18894.8	19179	19409.4	19639.5	19889.6	20083.5	19954.6	20207.2	20149.8	20198.5	20180.6	20038.8	19940.1	19897.3	19647.1	19488	19353.3	19179.8	18943.3	18856	18618.4	18501	18170.2	18078.6	17762.7	17654.4	17384.3
	446	17348.3	17873.9	18218.6	18755.2	19142.4	19430.4	19663.8	19896.9	20150.3	20346.7	20216.2	20472.1	20413.9	20463.3	20445.1	20301.5	20201.4	20158.2	19904.7	19743.5	19606.9	19431.2	19191.6	19103.2	18862.5	18743.5	18408.4	18315.6	17995.6	17885.8	17612.2
	447	17582.3	18115	18464.4	19008.2	19400.7	19692.6	19929.1	20165.3	20422.2	20621.2	20488.9	20748.3	20689.3	20739.3	20720.9	20575.4	20474	20430.1	20173.2	20009.9	19871.5	19693.4	19450.6	19360.9	19116.9	18996.4	18656.7	18562.7	18238.4	18127.1	17849.8
	448	17659.9	18195	18545.9	19092.1	19486.3	19779.5	20017	20254.3	20512.3	20712.2	20579.4	20839.8	20780.6	20830.9	20812.4	20666.2	20564.4	20520.3	20262.2	20098.2	19959.2	19780.3	19536.4	19446.4	19201.3	19080.2	18739.1	18644.6	18318.8	18207.1	17928.6
	449	17905.1	18447.6	18803.4	19357.2	19756.9	20054.1	20295	20535.6	20797.1	20999.8	20865.1	21129.2	21069.2	21120.1	21101.4	20953.1	20849.9	20805.2	20543.6	20377.2	20236.3	20054.9	19807.7	19716.4	19467.9	19345.2	18999.3	18903.5	18573.2	18459.9	18177.5
	450	17681.1	18216.8	18568.1	19115	19509.7	19803.2	20041.1	20278.6	20536.9	20737.1	20604	20864.9	20805.6	20855.9	20837.3	20691	20589	20544.9	20286.5	20122.3	19983.1	19804	19559.8	19469.7	19224.3	19103.1	18761.5	18667	18340.8	18228.9	17950.1
	451	17581.4	18114.1	18463.4	19007.3	19399.7	19691.6	19928.1	20164.3	20421.1	20620.2	20487.9	20747.2	20688.3	20738.3	20719.9	20574.3	20473	20429.1	20172.2	20008.8	19870.5	19692.4	19449.6	19359.9	19116	18995.4	18655.8	18561.7	18237.4	18126.2	17848.9
	452	17564.1	18096.2	18445.2	18988.5	19380.5	19672.1	19908.4	20144.4	20400.9	20599.8	20467.6	20726.7	20667.8	20717.8	20699.4	20554	20452.7	20408.9	20152.2	19989.1	19850.8	19672.9	19430.3	19340.8	19097.1	18976.7	18637.3	18543.4	18219.4	18108.2	17831.2
	453	17416.8	17944.5	18290.5	18829.2	19218	19507.1	19741.4	19975.5	20229.8	20427	20296	20552.9	20494.5	20544	20525.8	20381.6	20281.2	20237.7	19983.2	19821.4	19684.3	19507.9	19267.4	19178.6	18936.9	18817.5	18481	18387.9	18066.6	17956.4	17681.7
	454	17249.8	17772.5	18115.2	18648.7	19033.8	19320.1	19552.2	19784	20035.9	20231.2	20101.5	20355.9	20298.1	20347.1	20329.1	20186.3	20086.8	20043.7	19791.7	19631.4	19495.7	19320.9	19082.7	18994.8	18755.4	18637.2	18303.9	18211.6	17893.4	17784.3	17512.2
	455	17044.4	17560.8	17899.5	18426.7	18807.2	19090.1	19319.4	19548.4	19797.4	19990.3	19862.1	20113.5	20056.3	20104.8	20087	19945.9	19847.6	19805.1	19556	19397.7	19263.5	19090.9	18855.5	18768.6	18532.1	18415.2	18085.9	17994.8	17680.4	17572.5	17303.7
	456	16528.8	17029.6	17358	17869.2	18238.2	18512.6	18734.9	18957	19198.4	19385.6	19261.2	19505	19449.6	19496.6	19479.3	19342.5	19247.2	19205.9	18964.4	18810.8	18680.7	18513.3	18285	18200.8	17971.4	17858.1	17538.8	17450.4	17145.5	17040.9	16780.2
	457	16315.4	16809.7	17133.9	17638.6	18002.8	18273.6	18493.1	18712.3	18950.6	19135.3	19012.6	19253.2	19198.5	19244.9	19227.8	19092.8	18998.7	18958	18719.6	18568	18439.6	18274.3	18049	17965.8	17739.4	17627.6	17312.4	17225.1	16924.2	16820.9	16563.6
	458	16061.1	16547.8	16866.9	17363.7	17722.2	17988.8	18204.9	18420.7	18655.3	18837.1	18716.3	18953.2	18899.3	18945	18928.2	18795.2	18702.6	18662.5	18427.8	18278.6	18152.2	17989.5	17767.7	17685.8	17463	17352.9	17042.6	16956.7	16660.4	16558.8	16305.4
	459	15620	16093.3	16403.7	16886.8	17235.5	17494.8	17704.9	17914.8	18142.9	18319.8	18202.3	18432.7	18380.3	18424.7	18408.4	18279.1	18189	18150	17921.8	17776.6	17653.7	17495.5	17279.8	17200.1	16983.4	16876.3	16574.5	16491	16202.9	16104	15857.6
	460	15369.6	15835.2	16140.6	16616	16959.1	17214.2	17421	17627.5	17852	18026	17910.4	18137.1	18085.5	18129.3	18113.2	17985.9	17897.3	17858.9	17634.4	17491.6	17370.6	17214.9	17002.7	16924.3	16711	16605.7	16308.7	16226.5	15943	15845.8	15603.3
	[nm]	E02	X50
[nm]		470	471	472	473	474	475	476	477	478	479	480	481	482	483	484	485	486	487	488	489	490	491	492	493	494	495	496	497	498	499	500
	430	10965.3	11270.4	11456.8	11768.5	12002	12142.8	12263.8	12367.5	12523.2	12582.3	12503.8	12597.9	12549.6	12578.6	12549.2	12425.8	12351.6	12324.8	12158.2	12052.6	11939.9	11822.8	11663.1	11605.4	11433.1	11372.7	11166.9	11087	10924.2	10826.5	10648.2
	431	10963.7	11268.8	11455.1	11766.8	12000.2	12141	12262	12365.7	12521.4	12580.4	12502	12596	12547.7	12576.8	12547.3	12423.9	12349.8	12323	12156.4	12050.8	11938.2	11821.1	11661.4	11603.7	11431.4	11371	11165.3	11085.4	10922.6	10824.9	10646.7
	432	11087.4	11395.9	11584.3	11899.5	12135.6	12277.9	12400.3	12505.2	12662.6	12722.3	12643	12738.1	12689.3	12718.6	12688.8	12564.1	12489.1	12462	12293.5	12186.7	12072.8	11954.4	11792.9	11734.5	11560.4	11499.3	11291.2	11210.4	11045.8	10947	10766.8
	433	11219.5	11531.7	11722.3	12041.3	12280.2	12424.2	12548.1	12654.2	12813.5	12873.9	12793.7	12889.9	12840.5	12870.2	12840	12713.8	12637.9	12610.5	12440	12332	12216.7	12096.9	11933.5	11874.4	11698.1	11636.3	11425.7	11344	11177.4	11077.5	10895.1
	434	11391.9	11708.9	11902.5	12226.3	12468.9	12615.1	12740.9	12848.6	13010.4	13071.8	12990.2	13088	13037.8	13067.9	13037.3	12909.1	12832.1	12804.3	12631.1	12521.4	12404.4	12282.7	12116.8	12056.8	11877.9	11815.1	11601.3	11518.3	11349.2	11247.7	11062.5
	435	11597.1	11919.8	12116.9	12446.6	12693.5	12842.4	12970.4	13080.1	13244.8	13307.2	13224.3	13323.7	13272.6	13303.4	13272.2	13141.7	13063.3	13034.9	12858.7	12747	12627.9	12504	12335.1	12274	12091.8	12028	11810.3	11725.8	11553.6	11450.3	11261.8
	436	11643.3	11967.3	12165.2	12496.2	12744.1	12893.6	13022.1	13132.2	13297.5	13360.3	13277	13376.8	13325.5	13356.4	13325.1	13194.1	13115.4	13086.9	12909.9	12797.8	12678.2	12553.9	12384.3	12323	12140	12075.9	11857.4	11772.5	11599.7	11495.9	11306.6
	437	11794.1	12122.2	12322.7	12658	12909.1	13060.5	13190.7	13302.2	13469.7	13533.2	13448.8	13550	13498	13529.3	13497.6	13364.9	13285.1	13256.3	13077.1	12963.5	12842.3	12716.4	12544.6	12482.5	12297.2	12232.2	12010.9	11924.9	11749.8	11644.8	11453
	438	12014	12348.3	12552.4	12894	13149.8	13304	13436.6	13550.2	13720.9	13785.6	13699.6	13802.7	13749.7	13781.6	13749.3	13614.1	13532.9	13503.5	13320.9	13205.2	13081.8	12953.5	12778.5	12715.2	12526.5	12460.3	12234.8	12147.3	11968.9	11861.9	11666.6
	439	12312.7	12655.3	12864.5	13214.5	13476.7	13634.8	13770.7	13887.1	14062	14128.3	14040.2	14145.8	14091.6	14124.2	14091.1	13952.6	13869.3	13839.2	13652.1	13533.5	13407	13275.5	13096.2	13031.4	12837.9	12770.1	12539	12449.3	12266.5	12156.8	11956.6
	440	12349.4	12693	12902.8	13253.9	13516.8	13675.4	13811.7	13928.5	14103.9	14170.4	14082	14188	14133.6	14166.3	14133.1	13994.1	13910.6	13880.4	13692.8	13573.9	13447	13315.1	13135.2	13070.2	12876.2	12808.2	12576.4	12486.4	12303.1	12193	11992.3
	441	12551.4	12900.7	13114	13470.8	13738	13899.2	14037.7	14156.4	14334.7	14402.3	14312.5	14420.1	14364.8	14398.1	14364.4	14223.1	14138.3	14107.6	13916.8	13796	13667	13533	13350.2	13284.1	13086.9	13017.8	12782.2	12690.7	12504.4	12392.5	12188.5
	442	12682.7	13035.5	13251.1	13611.6	13881.6	14044.5	14184.5	14304.4	14484.5	14552.9	14462.1	14570.9	14515	14548.6	14514.5	14371.8	14286.1	14255.1	14062.3	13940.2	13809.9	13674.5	13489.7	13422.9	13223.7	13153.9	12915.8	12823.4	12635.1	12522.1	12315.9
	443	12742	13096.5	13313	13675.3	13946.6	14110.2	14250.8	14371.3	14552.3	14620.9	14529.7	14639	14582.9	14616.6	14582.4	14439	14352.9	14321.7	14128.1	14005.4	13874.5	13738.4	13552.8	13485.7	13285.5	13215.4	12976.2	12883.4	12694.2	12580.7	12373.5
	444	12841.4	13198.7	13416.9	13782	14055.4	14220.3	14362	14483.4	14665.8	14735	14643.1	14753.2	14696.7	14730.7	14696.2	14551.7	14464.8	14433.4	14238.3	14114.6	13982.7	13845.6	13658.6	13590.9	13389.2	13318.5	13077.4	12983.9	12793.2	12678.8	12470
	445	13017.7	13379.9	13601.2	13971.2	14248.4	14415.6	14559.2	14682.3	14867.2	14937.3	14844.2	14955.8	14898.5	14933	14898	14751.5	14663.5	14631.7	14433.8	14308.5	14174.7	14035.7	13846.1	13777.6	13573.1	13501.4	13257	13162.2	12968.9	12852.9	12641.3
	446	13137.3	13502.8	13726.1	14099.6	14379.3	14548	14693	14817.2	15003.8	15074.5	14980.5	15093.2	15035.3	15070.1	15034.8	14887	14798.2	14766.1	14566.4	14439.9	14304.9	14164.6	13973.3	13904.1	13697.7	13625.4	13378.8	13283.1	13088	12971	12757.4
	447	13277.5	13646.9	13872.6	14250	14532.7	14703.2	14849.8	14975.3	15163.9	15235.4	15140.4	15254.3	15195.8	15231	15195.3	15045.9	14956.1	14923.6	14721.8	14594	14457.6	14315.8	14122.4	14052.5	13843.9	13770.8	13521.6	13424.8	13227.7	13109.4	12893.5
	448	13335.9	13707	13933.6	14312.8	14596.7	14767.9	14915.1	15041.3	15230.6	15302.5	15207	15321.4	15262.7	15298	15262.2	15112.1	15021.9	14989.3	14786.7	14658.2	14521.2	14378.8	14184.6	14114.4	13904.8	13831.4	13581.1	13483.9	13285.9	13167.1	12950.3
	449	13485.4	13860.6	14089.8	14473.2	14760.3	14933.4	15082.3	15209.8	15401.3	15474	15377.5	15493.1	15433.7	15469.4	15433.2	15281.5	15190.3	15157.3	14952.4	14822.5	14684	14540	14343.6	14272.5	14060.7	13986.4	13733.3	13635	13434.8	13314.7	13095.4
	450	13313.6	13684.1	13910.3	14288.8	14572.3	14743.2	14890.2	15016.1	15205.1	15276.9	15181.6	15295.8	15237.1	15272.4	15236.6	15086.8	14996.8	14964.3	14761.9	14633.7	14496.9	14354.8	14160.9	14090.7	13881.6	13808.3	13558.4	13461.4	13263.7	13145.1	12928.6
	451	13244.9	13613.4	13838.5	14215	14497	14667.1	14813.3	14938.5	15126.6	15198	15103.2	15216.8	15158.5	15193.5	15158	15008.9	14919.4	14887	14685.7	14558.2	14422.1	14280.6	14087.7	14018	13809.9	13737	13488.4	13391.8	13195.2	13077.2	12861.9
	452	13264.2	13633.3	13858.7	14235.8	14518.2	14688.5	14834.9	14960.4	15148.7	15220.2	15125.3	15239.1	15180.6	15215.8	15180.1	15030.9	14941.2	14908.7	14707.2	14579.4	14443.2	14301.5	14108.3	14038.5	13830.1	13757	13508.1	13411.4	13214.5	13096.3	12880.7
	453	13161.1	13527.3	13750.9	14125.1	14405.3	14574.3	14719.6	14844	15030.9	15101.8	15007.6	15120.5	15062.6	15097.4	15062.1	14914	14825	14792.8	14592.8	14466	14330.8	14190.3	13998.6	13929.3	13722.5	13650	13403	13307.1	13111.7	12994.5	12780.5
	454	13087.3	13451.4	13673.8	14045.9	14324.5	14492.6	14637	14760.8	14946.6	15017.2	14923.5	15035.8	14978.1	15012.8	14977.6	14830.3	14741.9	14709.9	14511	14384.9	14250.5	14110.7	13920.1	13851.2	13645.6	13573.5	13327.9	13232.5	13038.2	12921.6	12708.8
	455	12979	13340.1	13560.7	13929.7	14206	14372.7	14515.9	14638.7	14823	14892.9	14800	14911.4	14854.2	14888.6	14853.7	14707.6	14619.9	14588.2	14390.9	14265.9	14132.6	13994	13805	13736.6	13532.7	13461.2	13217.6	13123	12930.3	12814.7	12603.7
	456	12614.9	12965.9	13180.3	13538.9	13807.5	13969.5	14108.7	14228	14407.2	14475.1	14384.9	14493.1	14437.5	14470.9	14437	14295.1	14209.8	14178.9	13987.2	13865.7	13736.1	13601.4	13417.7	13351.3	13153.1	13083.6	12846.8	12754.9	12567.6	12455.2	12250.1
	457	12511.9	12860	13072.6	13428.3	13694.7	13855.4	13993.5	14111.8	14289.5	14356.9	14267.3	14374.7	14319.6	14352.7	14319.1	14178.3	14093.7	14063.1	13872.9	13752.5	13623.9	13490.3	13308.1	13242.2	13045.6	12976.7	12741.9	12650.7	12465	12353.5	12150.1
	458	12360.4	12704.3	12914.4	13265.8	13528.9	13687.7	13824.1	13941	14116.5	14183.1	14094.7	14200.7	14146.2	14179	14145.8	14006.7	13923.1	13892.9	13705	13586	13459	13327	13147	13081.9	12887.7	12819.6	12587.6	12497.6	12314.1	12203.9	12003
	459	12084.3	12420.6	12625.9	12969.5	13226.8	13381.9	13515.3	13629.6	13801.2	13866.3	13779.8	13883.5	13830.3	13862.3	13829.8	13693.8	13612.1	13582.6	13398.9	13282.5	13158.4	13029.3	12853.4	12789.7	12599.9	12533.3	12306.5	12218.4	12039	11931.4	11734.9
	460	11925.7	12257.5	12460.1	12799.2	13053.1	13206.2	13337.8	13450.6	13620	13684.2	13598.9	13701.2	13648.6	13680.2	13648.2	13514	13433.4	13404.2	13223	13108.1	12985.6	12858.2	12684.6	12621.8	12434.4	12368.7	12144.9	12058	11880.9	11774.7	11580.8
	[nm]	E03	X51
[nm]		470	471	472	473	474	475	476	477	478	479	480	481	482	483	484	485	486	487	488	489	490	491	492	493	494	495	496	497	498	499	500
	430	48617.5	50449.2	51706.1	53581.6	54994.5	56017.4	56852.9	57544.2	58471.1	58961.7	58721.8	59321.8	59129.1	59274.5	59191.1	58629.3	58277.5	58051.5	57216.6	56697.8	56152.8	55576.6	54791.9	54355.1	53587.9	53170	52174.3	51789.5	50811.3	50350.8	49519.4
	431	48823.3	50662.8	51925	53808.5	55227.3	56254.5	57093.5	57787.8	58718.6	59211.3	58970.3	59572.9	59379.4	59525.4	59441.7	58877.5	58524.2	58297.3	57458.8	56937.8	56390.5	55811.9	55023.9	54585.2	53814.8	53395.1	52395.1	52008.7	51026.4	50563.9	49729
	432	49420	51282	52559.6	54466.1	55902.3	56942.1	57791.3	58494.1	59436.3	59935	59691.1	60301.1	60105.2	60253	60168.2	59597.1	59239.5	59009.8	58161.1	57633.7	57079.8	56494	55696.4	55252.3	54472.5	54047.7	53035.5	52644.3	51650	51181.9	50336.8
	433	50044.3	51929.8	53223.6	55154.2	56608.6	57661.5	58521.5	59233.1	60187.2	60692.2	60445.2	61062.9	60864.5	61014.2	60928.3	60350.1	59987.9	59755.3	58895.9	58361.8	57800.9	57207.7	56400	55950.4	55160.7	54730.5	53705.6	53309.4	52302.6	51828.5	50972.7
	434	50947.5	52867	54184.1	56149.5	57630.1	58702.1	59577.6	60302	61273.3	61787.4	61536	62164.8	61962.9	62115.3	62027.9	61439.2	61070.5	60833.6	59958.7	59415	58844	58240.1	57417.8	56960.1	56156.1	55718.2	54674.7	54271.5	53246.4	52763.8	51892.6
	435	51842.8	53796	55136.3	57136.3	58642.9	59733.7	60624.5	61361.8	62350.1	62873.3	62617.4	63257.3	63051.8	63206.9	63117.9	62518.9	62143.7	61902.7	61012.4	60459.2	59878.1	59263.6	58426.9	57961.1	57143	56697.4	55635.6	55225.2	54182.2	53691.1	52804.5
	436	52255.1	54223.8	55574.8	57590.7	59109.3	60208.7	61106.7	61849.7	62846	63373.3	63115.4	63760.3	63553.2	63709.5	63619.9	63016	62637.9	62395	61497.6	60939.9	60354.2	59734.9	58891.5	58422	57597.4	57148.3	56078	55664.4	54613	54118	53224.4
	437	53032.8	55030.8	56401.9	58447.8	59989	61104.8	62016.1	62770.2	63781.3	64316.4	64054.7	64709.3	64499	64657.7	64566.7	63953.9	63570.1	63323.6	62412.9	61846.9	61252.5	60623.9	59768	59291.5	58454.6	57998.8	56912.6	56492.8	55425.8	54923.5	54016.6
	438	54094.2	56132.3	57530.8	59617.6	61189.6	62327.8	63257.4	64026.6	65057.9	65603.7	65336.7	66004.4	65790	65951.8	65859	65233.9	64842.5	64591	63662.1	63084.8	62478.5	61837.3	60964.2	60478.2	59624.6	59159.6	58051.7	57623.5	56535.2	56022.8	55097.7
	439	55501.4	57592.5	59027.4	61168.5	62781.4	63949.1	64902.9	65692.1	66750.3	67310.3	67036.4	67721.4	67501.4	67667.4	67572.2	66930.9	66529.3	66271.3	65318.1	64725.8	64103.7	63445.9	62550.1	62051.5	61175.6	60698.6	59561.8	59122.5	58005.9	57480.1	56531
	440	55834.4	57938	59381.5	61535.4	63158	64332.8	65292.3	66086.2	67150.7	67714.1	67438.5	68127.7	67906.4	68073.4	67977.6	67332.4	66928.4	66668.8	65710	65114.1	64488.3	63826.6	62925.4	62423.7	61542.6	61062.7	59919.2	59477.2	58353.8	57824.9	56870.1
	441	56797.6	58937.5	60405.9	62597	64247.6	65442.6	66418.7	67226.3	68309.2	68882.3	68602	69303	69077.9	69247.8	69150.3	68494	68083	67819	66843.6	66237.5	65600.8	64927.7	64010.9	63500.6	62604.4	62116.2	60952.9	60503.3	59360.6	58822.5	57851.3
	442	57649.6	59821.7	61312.1	63536.1	65211.4	66424.4	67415	68234.8	69333.9	69915.6	69631.1	70342.7	70114.1	70286.6	70187.7	69521.5	69104.4	68836.4	67846.3	67231.1	66584.9	65901.7	64971.2	64453.2	63543.5	63048	61867.2	61410.9	60251	59704.9	58719.1
	443	58092.1	60280.8	61782.7	64023.7	65712	66934.2	67932.5	68758.6	69866.1	70452.3	70165.6	70882.6	70652.3	70826.1	70726.4	70055.1	69634.8	69364.7	68367.1	67747.2	67096	66407.5	65469.9	64947.9	64031.2	63531.9	62342.1	61882.3	60713.5	60163.2	59169.8
	444	58592	60799.5	62314.3	64574.6	66277.4	67510.2	68517	69350.2	70467.2	71058.5	70769.3	71492.5	71260.3	71435.5	71335	70657.9	70234	69961.6	68955.4	68330.1	67673.4	66978.9	66033.2	65506.8	64582.2	64078.6	62878.5	62414.8	61235.9	60680.9	59678.9
	445	59642.7	61889.8	63431.8	65732.7	67465.9	68720.8	69745.7	70593.8	71730.9	72332.8	72038.4	72774.6	72538.2	72716.6	72614.2	71925	71493.5	71216.2	70191.9	69555.5	68886.9	68180.1	67217.4	66681.5	65740.4	65227.7	64006.1	63534.1	62334.1	61769.1	60749.2
	446	60303.3	62575.3	64134.4	66460.7	68213.2	69482	70518.2	71375.7	72525.4	73133.9	72836.3	73580.6	73341.6	73522	73418.5	72721.7	72285.3	72005	70969.4	70325.9	69649.9	68935.2	67961.9	67420.1	66468.5	65950.2	64715.1	64237.8	63024.5	62453.2	61422
	447	61195.6	63501.3	65083.4	67444.1	69222.5	70510.1	71561.7	72431.9	73598.6	74216.1	73914.1	74669.4	74426.8	74609.9	74504.9	73797.7	73354.9	73070.4	72019.5	71366.4	70680.5	69955.2	68967.5	68417.7	67452	66926	65672.6	65188.3	63957	63377.3	62330.9
	448	61561.8	63881.3	65472.8	67847.7	69636.8	70932	71989.9	72865.3	74039	74660.2	74356.4	75116.2	74872.2	75056.3	74950.7	74239.4	73793.9	73507.7	72450.5	71793.5	71103.5	70373.9	69380.2	68827.1	67855.7	67326.5	66065.6	65578.4	64339.8	63756.6	62703.9
	449	62458.2	64811.4	66426.2	68835.7	70650.8	71964.9	73038.2	73926.3	75117.1	75747.3	75439.1	76210	75962.4	76149.2	76042.1	75320.4	74868.4	74578.1	73505.5	72838.9	72138.9	71398.6	70390.5	69829.3	68843.7	68306.9	67027.6	66533.3	65276.6	64685	63616.9
[truncated: 1,496 more rows]

## Sheet: EEM Positions
												Type 1		Type 2		Type 3		Type 4
			Sample	Ex	Em						Time	Ex	Em	Ex	Em	Ex	Em	Ex	Em
			A1	452.008	482.156						0h	453.872	481.625	452.082	481.926	454.816	481.748	446.849	483.966
[truncated: 95 more rows]

## Sheet: Incubated 3 Types
Type 1 0h	[nm]																																	1h	[nm]
[truncated: 131 more rows]
[truncated: 305 more columns]
