# Supplementary material for: Rapid restructurization of conformationally-distinct alpha-synuclein amyloid fibrils at an elevated temperature
Source: PeerJ. 2022 Sep 30;10:e14137. doi: 10.7717/peerj.14137 (PMC9528901; doi:10.7717/peerj.14137)
Supplement: Supplemental Information 4 [file peerj-10-14137-s004.xlsx]

## Sheet: Spectra
XDP	I	II	III	IV	V	VI	VII	VIII		Type 1 24h	Type 1 48h	Type 2 24h	Type 2 48h	Type 3 24h	Type 3 48h	Type 4 24h	Type 4 48h		Type 1 reseed	Type 2 reseed	Type 3 reseed	Type 4 reseeded
1699.85	0	0	0	0	0	0	0	0		0	0	0.000233952	0	0.000215293	0	0	0		0	0	0	0			0	0	0	0	0	0	0	0
1699.14	1.22094e-05	-1.88744e-06	-5.16167e-05	6.02477e-05	2.8423e-05	2.50109e-05	1.85287e-05	1.31945e-06		1.76459e-05	6.72671e-06	0.000230148	2.58551e-05	0.000228088	1.40126e-05	1.94957e-05	2.27875e-05		2.53796e-05	2.09735e-05	2.83805e-05	2.00575e-05			4.54864e-06	2.95989e-05	2.81062e-05	2.06777e-05	6.7919e-06	1.88812e-05	2.10067e-05	2.83961e-05
1698.42	2.44337e-05	1.42745e-05	-3.49097e-05	0.000112742	5.72898e-05	5.14212e-05	5.65755e-05	3.93165e-05		4.89329e-05	2.52096e-05	0.00023615	5.86233e-05	0.000249307	4.46918e-05	4.49537e-05	4.73139e-05		4.81581e-05	3.93357e-05	4.93398e-05	4.04441e-05			2.94676e-05	5.23967e-05	3.90689e-05	3.3575e-05	2.27598e-05	3.92054e-05	2.40882e-05	4.18032e-05
1697.71	3.75817e-05	2.49433e-05	4.56348e-08	0.000182574	0.000118752	8.50362e-05	0.000134926	0.000132236		8.99642e-05	5.86596e-05	0.000263229	9.94694e-05	0.000280222	8.38331e-05	7.80421e-05	7.68035e-05		7.62227e-05	6.19181e-05	7.08994e-05	6.17141e-05			6.33075e-05	9.65461e-05	6.28429e-05	5.83e-05	4.17095e-05	7.78516e-05	6.42773e-05	7.82764e-05
1697	4.84253e-05	2.13353e-05	-1.79838e-06	0.000282869	0.000221649	0.00013058	0.000247866	0.000259961		0.00013592	0.000104251	0.000310495	0.000147791	0.000320482	0.000126067	0.00012071	0.000114987		0.000117096	9.69096e-05	0.000105099	8.97376e-05			9.65172e-05	0.000165494	0.000111912	0.000103534	6.62757e-05	0.000136225	0.000150197	0.000147315
1696.29	6.20906e-05	4.44838e-05	-1.84653e-05	0.000373916	0.000315747	0.000184368	0.00035114	0.000353448		0.000185761	0.000155953	0.000370062	0.000197991	0.000372199	0.000177049	0.000175796	0.00016205		0.000172308	0.00014661	0.00015916	0.000136141			0.000130781	0.000230639	0.000171649	0.000161558	0.00011359	0.000197023	0.000230287	0.00021799
1695.57	9.82846e-05	0.000106979	-1.6056e-05	0.000435115	0.000370974	0.000242564	0.000421551	0.000394622		0.000238377	0.000205011	0.000424375	0.000246902	0.000430768	0.000236545	0.000236899	0.000215225		0.000237734	0.000205727	0.000228191	0.000200492			0.000169703	0.00028107	0.000231668	0.000222951	0.000179224	0.000250466	0.000279043	0.000274318
1694.86	0.000180693	0.000195616	3.50522e-05	0.000484918	0.000405471	0.000301469	0.000472003	0.00043339		0.000293272	0.000247645	0.000464105	0.000293826	0.00048781	0.000299702	0.000293916	0.000267883		0.000301621	0.000261696	0.00029522	0.000266052			0.00021649	0.000324301	0.000283651	0.000277135	0.000240808	0.000296654	0.000307144	0.000317368
1694.15	0.000300999	0.000299393	0.000142388	0.000545895	0.000447383	0.000360262	0.000518698	0.0005058		0.000353036	0.000291327	0.000501178	0.000341992	0.000543471	0.000367212	0.000347589	0.000317629		0.000357738	0.000310456	0.000352509	0.000323068			0.000272606	0.000366454	0.000324171	0.000322043	0.000292999	0.000339981	0.000329514	0.000352089
1693.43	0.000415379	0.000391129	0.000257722	0.000634318	0.000518255	0.000424059	0.000568819	0.000607881		0.00041795	0.000344467	0.000547858	0.000398679	0.000601829	0.000437452	0.000403218	0.000369664		0.000413732	0.000362449	0.000409456	0.000376505			0.000331401	0.000421494	0.000369956	0.000370845	0.000339576	0.000392165	0.000374335	0.000400346
1692.72	0.000491998	0.000466998	0.00035199	0.000734926	0.000606121	0.000492565	0.000615412	0.00070677		0.000484571	0.000405654	0.00060431	0.00046283	0.000663366	0.000506582	0.000461587	0.000425216		0.000475185	0.000423606	0.000473339	0.000433528			0.000386534	0.000485826	0.000425739	0.000427223	0.00038772	0.000452665	0.00043857	0.000462956
1692.01	0.000538318	0.000548311	0.000433354	0.00082323	0.000690417	0.000561108	0.000656028	0.00078466		0.000549178	0.000467765	0.000664368	0.000526303	0.000725624	0.000571943	0.000520183	0.000480829		0.000539766	0.000489386	0.00054095	0.00049413			0.000438267	0.000546255	0.000482417	0.000484783	0.000442025	0.000513208	0.000500874	0.000524766
1691.29	0.000581996	0.000644223	0.000510543	0.000901931	0.000770615	0.00062987	0.000699348	0.000853756		0.000612547	0.00052862	0.000725418	0.000586577	0.000788503	0.000635729	0.000579966	0.000536892		0.000605113	0.00055529	0.000608503	0.000556199			0.000491378	0.000601325	0.00053629	0.000542119	0.000503187	0.000571936	0.000555912	0.000581012
1690.58	0.000637934	0.000744384	0.000580772	0.000985748	0.000852413	0.000702258	0.000747051	0.000923329		0.00067857	0.000591319	0.000789303	0.000648091	0.00085426	0.000703164	0.000644519	0.00059712		0.000672485	0.00062211	0.00067807	0.000622184			0.000549135	0.000656759	0.000591176	0.000603525	0.000571046	0.000631641	0.000609787	0.000636311
1689.87	0.000707491	0.000841136	0.000648396	0.00108	0.000939743	0.000780618	0.000797208	0.000994797		0.000751056	0.00065915	0.000858791	0.000716089	0.000924903	0.0007778	0.000715518	0.000663694		0.000745225	0.000693047	0.000753967	0.000696552			0.000612404	0.000717252	0.000652281	0.000672247	0.000645018	0.000695953	0.000668634	0.000696543
1689.15	0.000793738	0.000939546	0.000720922	0.00118	0.00104	0.000867309	0.00085579	0.00107		0.000833199	0.000734691	0.000936835	0.000794374	0.001	0.000861039	0.000793939	0.000738407		0.000828234	0.000772039	0.000839172	0.000781555			0.000683553	0.000788499	0.000725477	0.000750586	0.000725268	0.000770076	0.000740017	0.000768814
1688.44	0.000900169	0.00105	0.000799833	0.00128	0.00116	0.000964706	0.000929313	0.00116		0.000925841	0.000819383	0.00102	0.000884003	0.00109	0.000952525	0.000881193	0.000823276		0.000924624	0.000862379	0.000934479	0.00087631			0.000765714	0.000874955	0.000813931	0.000840124	0.000813872	0.000856906	0.000828536	0.000857119
1687.73	0.00102	0.00117	0.000884218	0.00139	0.00129	0.00107	0.00102	0.00126		0.00103	0.000913256	0.00112	0.000982687	0.00118	0.00105	0.000977376	0.000917758		0.00103	0.000963751	0.00104	0.000978015			0.00085911	0.000976376	0.000914982	0.000939723	0.000910949	0.000955242	0.000932958	0.00095915
1687.02	0.00116	0.00129	0.000971538	0.00153	0.00144	0.00119	0.00114	0.00137		0.00114	0.00102	0.00122	0.00109	0.00128	0.00115	0.00108	0.00102		0.00115	0.00107	0.00114	0.00108			0.000960412	0.00109	0.00103	0.00105	0.00101	0.00107	0.00106	0.00108
1686.3	0.00128	0.00139	0.00106	0.0017	0.00163	0.00132	0.00129	0.00152		0.00125	0.00113	0.00134	0.0012	0.00139	0.00125	0.00119	0.00113		0.00127	0.00119	0.00126	0.0012			0.00107	0.00123	0.00115	0.00117	0.00111	0.00119	0.00121	0.00121
1685.59	0.00141	0.00151	0.00115	0.00188	0.00183	0.00146	0.00144	0.00167		0.00137	0.00127	0.00148	0.00133	0.0015	0.00136	0.00131	0.00124		0.0014	0.00133	0.00138	0.00133			0.00119	0.00137	0.00129	0.0013	0.00123	0.00133	0.00137	0.00136
1684.88	0.00155	0.00168	0.0013	0.00202	0.00198	0.00162	0.00157	0.00175		0.00152	0.00142	0.00164	0.00146	0.00165	0.0015	0.00146	0.00138		0.00156	0.00149	0.00154	0.00149			0.00133	0.00149	0.00142	0.00144	0.0014	0.00146	0.00149	0.00148
1684.16	0.00171	0.00189	0.00148	0.00214	0.00211	0.00178	0.00169	0.00179		0.00167	0.00157	0.0018	0.00161	0.0018	0.00166	0.00162	0.00152		0.00173	0.00166	0.00171	0.00168			0.00149	0.00159	0.00156	0.00159	0.00159	0.00159	0.00158	0.00159
1683.45	0.0019	0.00211	0.00167	0.00228	0.00226	0.00195	0.00184	0.00188		0.00183	0.00172	0.00194	0.00176	0.00196	0.00182	0.00178	0.00168		0.00191	0.00183	0.00189	0.00186			0.00165	0.00173	0.00171	0.00175	0.00177	0.00174	0.00171	0.00173
1682.74	0.00211	0.00232	0.00187	0.00246	0.00246	0.00213	0.00204	0.00205		0.002	0.00187	0.00208	0.00192	0.00211	0.00198	0.00194	0.00183		0.00208	0.002	0.00206	0.00203			0.0018	0.0019	0.00187	0.00191	0.00191	0.0019	0.00187	0.00189
1682.02	0.00233	0.00252	0.00209	0.00268	0.0027	0.00232	0.00226	0.00227		0.00217	0.00204	0.00223	0.00209	0.00227	0.00215	0.00211	0.002		0.00226	0.00217	0.00223	0.00219			0.00197	0.00208	0.00204	0.00207	0.00206	0.00207	0.00205	0.00207
1681.31	0.00256	0.00275	0.00231	0.00292	0.00294	0.00251	0.00249	0.00252		0.00236	0.00222	0.0024	0.00227	0.00245	0.00233	0.00228	0.00218		0.00245	0.00236	0.00241	0.00238			0.00214	0.00226	0.00221	0.00225	0.00222	0.00225	0.00223	0.00224
1680.6	0.00281	0.003	0.00254	0.00316	0.00318	0.00273	0.00272	0.00279		0.00255	0.00241	0.00259	0.00246	0.00263	0.00252	0.00247	0.00236		0.00265	0.00256	0.00261	0.00257			0.00233	0.00245	0.00239	0.00244	0.0024	0.00243	0.00242	0.00243
1679.89	0.00307	0.00324	0.00277	0.00341	0.00341	0.00295	0.00296	0.00306		0.00276	0.00261	0.00279	0.00267	0.00284	0.00273	0.00268	0.00256		0.00287	0.00277	0.00282	0.00279			0.00252	0.00265	0.00259	0.00264	0.0026	0.00263	0.00262	0.00262
1679.17	0.00331	0.00346	0.00299	0.00367	0.00365	0.00319	0.00319	0.00335		0.00299	0.00283	0.00301	0.00289	0.00306	0.00295	0.0029	0.00278		0.00309	0.003	0.00305	0.00301			0.00272	0.00286	0.0028	0.00284	0.00279	0.00283	0.00283	0.00283
1678.46	0.00355	0.00369	0.00322	0.00394	0.00391	0.00344	0.00342	0.00366		0.00322	0.00306	0.00324	0.00312	0.00329	0.00318	0.00313	0.003		0.00333	0.00325	0.00329	0.00325			0.00293	0.00307	0.00301	0.00306	0.00299	0.00305	0.00305	0.00304
1677.75	0.00382	0.00395	0.00345	0.0042	0.00419	0.00371	0.00365	0.00398		0.00347	0.00331	0.00348	0.00336	0.00354	0.00342	0.00337	0.00324		0.00359	0.0035	0.00354	0.00351			0.00316	0.0033	0.00323	0.00328	0.00319	0.00327	0.00327	0.00327
1677.03	0.00411	0.00424	0.00371	0.00445	0.00448	0.00399	0.00388	0.00433		0.00373	0.00357	0.00374	0.00362	0.00381	0.00368	0.00362	0.00349		0.00385	0.00377	0.0038	0.00377			0.0034	0.00353	0.00346	0.00352	0.00342	0.0035	0.00351	0.0035
1676.32	0.00442	0.00457	0.00402	0.0047	0.00477	0.00429	0.00413	0.00472		0.00402	0.00385	0.00403	0.0039	0.0041	0.00397	0.0039	0.00376		0.00414	0.00405	0.00409	0.00406			0.00366	0.00378	0.00371	0.00378	0.00368	0.00376	0.00376	0.00375
1675.61	0.00474	0.00492	0.00437	0.00499	0.00506	0.00462	0.0044	0.00514		0.00433	0.00417	0.00435	0.0042	0.00443	0.00429	0.00422	0.00406		0.00446	0.00437	0.0044	0.00438			0.00396	0.00406	0.00399	0.00408	0.00398	0.00405	0.00403	0.00404
1674.89	0.00508	0.00525	0.00474	0.00533	0.00538	0.00498	0.00471	0.00559		0.00467	0.00451	0.0047	0.00455	0.00479	0.00463	0.00457	0.0044		0.00481	0.00472	0.00476	0.00474			0.00429	0.00439	0.00432	0.00441	0.00431	0.00438	0.00435	0.00436
1674.18	0.00541	0.00558	0.00511	0.00571	0.00574	0.00537	0.00504	0.00605		0.00503	0.00487	0.00505	0.00491	0.00515	0.005	0.00492	0.00475		0.00519	0.0051	0.00513	0.00511			0.00464	0.00473	0.00467	0.00476	0.00465	0.00472	0.00469	0.00471
1673.47	0.00578	0.00593	0.0055	0.0061	0.00612	0.00575	0.0054	0.00648		0.0054	0.00523	0.00541	0.00527	0.00551	0.00537	0.00529	0.00511		0.00556	0.00547	0.0055	0.00549			0.00499	0.00508	0.00502	0.00511	0.00499	0.00508	0.00502	0.00506
1672.76	0.00619	0.00634	0.0059	0.0065	0.00654	0.00615	0.00579	0.00684		0.0058	0.00563	0.00579	0.00566	0.00589	0.00575	0.00568	0.0055		0.00596	0.00587	0.00588	0.00588			0.00538	0.00545	0.00538	0.00548	0.00536	0.00545	0.00538	0.00543
1672.04	0.00664	0.0068	0.00633	0.0069	0.00699	0.00656	0.00616	0.00712		0.00622	0.00605	0.00621	0.00607	0.00629	0.00615	0.0061	0.00591		0.00638	0.00629	0.00628	0.0063			0.00579	0.00585	0.00578	0.00587	0.00576	0.00586	0.00577	0.00582
1671.33	0.00712	0.00728	0.00678	0.00731	0.00744	0.00698	0.00651	0.00733		0.00666	0.0065	0.00665	0.0065	0.00669	0.00655	0.00653	0.00633		0.00682	0.00672	0.0067	0.00674			0.00622	0.00626	0.00619	0.00629	0.00618	0.00628	0.00618	0.00622
1670.62	0.00759	0.00775	0.00724	0.00772	0.00789	0.00739	0.00683	0.00749		0.00711	0.00695	0.00709	0.00693	0.00709	0.00695	0.00696	0.00676		0.00726	0.00716	0.00712	0.00717			0.00665	0.00668	0.00661	0.00672	0.0066	0.00671	0.0066	0.00664
1669.9	0.00805	0.00821	0.00769	0.00811	0.00831	0.0078	0.00712	0.00765		0.00755	0.0074	0.00752	0.00736	0.0075	0.00736	0.00739	0.0072		0.0077	0.0076	0.00754	0.00761			0.00708	0.0071	0.00703	0.00715	0.00703	0.00713	0.00702	0.00706
1669.19	0.00851	0.00863	0.0081	0.00849	0.00871	0.0082	0.0074	0.00784		0.00799	0.00784	0.00795	0.00779	0.0079	0.00776	0.00781	0.00762		0.00814	0.00804	0.00797	0.00805			0.00752	0.00752	0.00745	0.00758	0.00747	0.00756	0.00744	0.00748
1668.48	0.00892	0.009	0.00846	0.00885	0.00908	0.00858	0.00768	0.00808		0.00838	0.00825	0.00834	0.00819	0.00828	0.00814	0.0082	0.00802		0.00854	0.00845	0.00837	0.00845			0.00793	0.00793	0.00785	0.00799	0.00788	0.00797	0.00784	0.00789
1667.76	0.00927	0.0093	0.00878	0.00918	0.00942	0.00892	0.00792	0.00838		0.00873	0.0086	0.00868	0.00855	0.00862	0.00848	0.00855	0.00837		0.0089	0.00881	0.00872	0.00881			0.00829	0.00829	0.0082	0.00835	0.00822	0.00833	0.0082	0.00826
1667.05	0.00955	0.00955	0.00908	0.00945	0.0097	0.00921	0.00813	0.00869		0.00903	0.00891	0.00898	0.00886	0.00892	0.00878	0.00885	0.00868		0.00922	0.00913	0.00904	0.00913			0.0086	0.00861	0.00851	0.00866	0.00852	0.00865	0.00851	0.00857
1666.34	0.00977	0.00977	0.00934	0.00968	0.00994	0.00947	0.0083	0.009		0.0093	0.00919	0.00924	0.00914	0.00919	0.00906	0.00911	0.00895		0.0095	0.00941	0.00932	0.00941			0.00889	0.00888	0.00877	0.00893	0.00878	0.00893	0.00879	0.00885
1665.63	0.00998	0.00995	0.00956	0.00988	0.01013	0.0097	0.00844	0.00929		0.00953	0.00943	0.00947	0.00938	0.00943	0.0093	0.00934	0.00919		0.00974	0.00965	0.00957	0.00965			0.00913	0.00912	0.009	0.00916	0.00902	0.00918	0.00902	0.00909
1664.91	0.01016	0.01013	0.00976	0.01007	0.0103	0.00989	0.00857	0.00956		0.00973	0.00963	0.00967	0.00957	0.00963	0.00951	0.00954	0.00939		0.00995	0.00986	0.00978	0.00985			0.00933	0.00931	0.00918	0.00936	0.00922	0.00938	0.00921	0.00929
1664.2	0.01033	0.0103	0.00995	0.01024	0.01045	0.01005	0.00869	0.0098		0.00989	0.0098	0.00983	0.00972	0.0098	0.00968	0.0097	0.00955		0.01012	0.01003	0.00995	0.01003			0.00949	0.00946	0.00932	0.00951	0.00939	0.00953	0.00936	0.00944
1663.49	0.01046	0.01044	0.01013	0.01036	0.01057	0.01018	0.00879	0.01		0.01002	0.00994	0.00996	0.00984	0.00994	0.00982	0.00984	0.00968		0.01027	0.01017	0.01009	0.01017			0.00962	0.00958	0.00943	0.00963	0.00953	0.00965	0.00947	0.00955
1662.77	0.01057	0.01055	0.01027	0.01043	0.01067	0.01028	0.00887	0.01016		0.01013	0.01005	0.01007	0.00994	0.01007	0.00993	0.00995	0.00979		0.01039	0.0103	0.01022	0.0103			0.00972	0.00967	0.00952	0.00973	0.00964	0.00974	0.00955	0.00964
1662.06	0.01068	0.01063	0.01038	0.01049	0.01075	0.01037	0.00896	0.01031		0.01022	0.01014	0.01015	0.01003	0.01017	0.01003	0.01005	0.00988		0.0105	0.0104	0.01033	0.01041			0.0098	0.00975	0.00961	0.00981	0.00972	0.00982	0.00963	0.00972
1661.35	0.01079	0.0107	0.0105	0.01058	0.01084	0.01045	0.00908	0.01047		0.0103	0.01022	0.01023	0.01011	0.01026	0.01011	0.01013	0.00997		0.0106	0.01049	0.01043	0.01051			0.00988	0.00983	0.00969	0.0099	0.0098	0.0099	0.00972	0.00981
1660.63	0.01089	0.01077	0.01063	0.01068	0.01093	0.01053	0.00922	0.01064		0.01038	0.0103	0.0103	0.01019	0.01035	0.0102	0.01021	0.01005		0.01068	0.01057	0.01051	0.01059			0.00996	0.00992	0.00978	0.00998	0.00987	0.00998	0.00981	0.0099
1659.92	0.01098	0.01084	0.01076	0.01078	0.011	0.01061	0.00937	0.01081		0.01046	0.01039	0.01038	0.01027	0.01043	0.01028	0.01029	0.01014		0.01075	0.01064	0.01059	0.01066			0.01004	0.01001	0.00986	0.01007	0.00995	0.01007	0.0099	0.00998
1659.21	0.01105	0.01092	0.01088	0.01086	0.01106	0.01067	0.0095	0.01096		0.01053	0.01047	0.01045	0.01035	0.01052	0.01037	0.01038	0.01023		0.01082	0.01072	0.01067	0.01073			0.01012	0.01009	0.00994	0.01015	0.01004	0.01015	0.00999	0.01007
1658.49	0.01113	0.011	0.011	0.01094	0.0111	0.01073	0.00963	0.01109		0.01061	0.01055	0.01052	0.01042	0.0106	0.01046	0.01046	0.01031		0.01089	0.01078	0.01074	0.0108			0.0102	0.01017	0.01002	0.01023	0.01012	0.01022	0.01007	0.01014
1657.78	0.01124	0.0111	0.01113	0.01104	0.01117	0.01079	0.00975	0.01122		0.01069	0.01063	0.01059	0.01048	0.01068	0.01054	0.01053	0.01039		0.01096	0.01085	0.0108	0.01086			0.01027	0.01025	0.01009	0.0103	0.01019	0.01028	0.01014	0.01021
1657.07	0.01138	0.01122	0.01127	0.01116	0.01127	0.01084	0.00986	0.01135		0.01076	0.01071	0.01066	0.01054	0.01076	0.01062	0.01061	0.01046		0.01102	0.01091	0.01087	0.01093			0.01033	0.01032	0.01016	0.01038	0.01027	0.01034	0.01021	0.01028
1656.36	0.01152	0.01136	0.01144	0.01128	0.01139	0.01089	0.00997	0.01147		0.01083	0.01078	0.01072	0.0106	0.01084	0.0107	0.01068	0.01054		0.01108	0.01096	0.01093	0.01099			0.0104	0.01039	0.01023	0.01045	0.01035	0.0104	0.01029	0.01035
1655.64	0.01164	0.01149	0.01161	0.0114	0.01152	0.01093	0.01009	0.01159		0.01089	0.01086	0.01079	0.01065	0.01092	0.01077	0.01075	0.01061		0.01114	0.01101	0.01098	0.01105			0.01046	0.01046	0.0103	0.01052	0.01043	0.01046	0.01037	0.01041
1654.93	0.01174	0.01161	0.01178	0.01152	0.01165	0.01098	0.01021	0.01174		0.01096	0.01094	0.01087	0.0107	0.01099	0.01084	0.01083	0.01068		0.0112	0.01106	0.01104	0.01111			0.01053	0.01054	0.01037	0.01059	0.01051	0.01053	0.01046	0.01048
1654.22	0.01183	0.01173	0.01193	0.01165	0.01176	0.01103	0.01035	0.0119		0.01103	0.01102	0.01096	0.01077	0.01107	0.01092	0.01091	0.01076		0.01126	0.01112	0.0111	0.01117			0.01061	0.01062	0.01045	0.01066	0.01059	0.0106	0.01056	0.01056
1653.5	0.01193	0.01187	0.01206	0.01176	0.01186	0.01109	0.01048	0.01205		0.01111	0.01112	0.01106	0.01085	0.01118	0.01101	0.011	0.01086		0.01135	0.0112	0.01118	0.01126			0.0107	0.01072	0.01055	0.01075	0.0107	0.01068	0.01066	0.01064
1652.79	0.01206	0.01199	0.01214	0.0119	0.01197	0.01118	0.01061	0.01216		0.01121	0.01124	0.01118	0.01096	0.01129	0.01113	0.01112	0.011		0.01146	0.0113	0.01129	0.01136			0.01081	0.01085	0.01069	0.01089	0.01083	0.0108	0.0108	0.01078
1652.08	0.01222	0.01209	0.0122	0.01205	0.01209	0.01129	0.01077	0.01228		0.01133	0.01137	0.01128	0.01111	0.01142	0.01127	0.01126	0.01115		0.01158	0.01143	0.01143	0.01148			0.01094	0.011	0.01085	0.01105	0.01096	0.01093	0.01096	0.01094
1651.36	0.01238	0.01223	0.01236	0.01218	0.0122	0.01141	0.01093	0.01238		0.01146	0.01151	0.0114	0.01127	0.01156	0.01143	0.0114	0.01131		0.01171	0.01157	0.01156	0.01161			0.01109	0.01113	0.01098	0.01118	0.0111	0.01106	0.01105	0.01105
1650.65	0.01252	0.0124	0.01259	0.0123	0.01231	0.01153	0.0111	0.01252		0.01162	0.01167	0.01154	0.01144	0.0117	0.01161	0.01155	0.01147		0.01184	0.0117	0.0117	0.01175			0.01126	0.01125	0.01111	0.01132	0.01126	0.01119	0.01115	0.01117
1649.94	0.01266	0.01257	0.01284	0.01244	0.01243	0.01165	0.01128	0.01267		0.01179	0.01185	0.0117	0.01161	0.01185	0.01179	0.01172	0.01164		0.01197	0.01184	0.01183	0.0119			0.01143	0.01141	0.01126	0.01146	0.01141	0.01134	0.01129	0.01131
1649.23	0.01283	0.01274	0.0131	0.01261	0.01257	0.01178	0.01145	0.01283		0.01195	0.01202	0.01187	0.01179	0.01202	0.01197	0.01189	0.01182		0.01212	0.01198	0.01198	0.01205			0.0116	0.01157	0.01141	0.01162	0.01158	0.0115	0.01144	0.01146
1648.51	0.01301	0.01293	0.01336	0.01277	0.01273	0.01191	0.01162	0.01297		0.01212	0.01219	0.01205	0.01197	0.01219	0.01214	0.01206	0.012		0.01226	0.01213	0.01212	0.0122			0.01177	0.01172	0.01157	0.01176	0.01174	0.01165	0.01159	0.01159
1647.8	0.01321	0.01313	0.01359	0.01294	0.01291	0.01204	0.0118	0.0131		0.01228	0.01236	0.01223	0.01213	0.01235	0.01231	0.01223	0.01217		0.01241	0.01227	0.01226	0.01234			0.01192	0.01186	0.01172	0.01191	0.01191	0.01179	0.01174	0.01173
1647.09	0.0134	0.01333	0.0138	0.01313	0.01312	0.01217	0.01201	0.01324		0.01244	0.01253	0.0124	0.01229	0.01251	0.01246	0.0124	0.01234		0.01255	0.01241	0.0124	0.01249			0.01207	0.01203	0.0119	0.01207	0.01206	0.01195	0.01191	0.01189
1646.37	0.01359	0.01353	0.01398	0.01334	0.01334	0.01232	0.01223	0.01337		0.01261	0.0127	0.01257	0.01246	0.01268	0.01263	0.01258	0.01253		0.01272	0.01258	0.01256	0.01265			0.01222	0.01223	0.0121	0.01227	0.01223	0.01214	0.01212	0.0121
1645.66	0.01377	0.01375	0.01416	0.01359	0.01356	0.0125	0.01242	0.01349		0.01281	0.01289	0.01276	0.01266	0.01288	0.01281	0.01279	0.01273		0.01292	0.01277	0.01276	0.01284			0.01241	0.01247	0.01234	0.01249	0.01243	0.01235	0.01237	0.01234
1644.95	0.01399	0.01399	0.0144	0.01386	0.01379	0.0127	0.01259	0.01366		0.01305	0.0131	0.01297	0.01287	0.01309	0.01303	0.01302	0.01296		0.01314	0.01299	0.01298	0.01306			0.01263	0.01272	0.01259	0.01274	0.01266	0.01259	0.01262	0.01259
1644.23	0.01428	0.01427	0.01472	0.01416	0.01407	0.01293	0.01278	0.01387		0.01332	0.01335	0.01321	0.01312	0.01335	0.01328	0.01327	0.01321		0.01338	0.01323	0.01323	0.01329			0.01289	0.01298	0.01286	0.01301	0.01292	0.01286	0.01288	0.01286
1643.52	0.01464	0.0146	0.01509	0.01449	0.01441	0.0132	0.01299	0.01412		0.01363	0.01365	0.0135	0.01341	0.01364	0.01358	0.01357	0.01351		0.01366	0.01351	0.01352	0.01356			0.01318	0.01329	0.01316	0.01332	0.01323	0.01317	0.01319	0.01316
1642.81	0.01505	0.01498	0.01549	0.01486	0.0148	0.01349	0.01322	0.01433		0.01399	0.014	0.01382	0.01373	0.01397	0.01391	0.0139	0.01385		0.01397	0.01381	0.01383	0.01387			0.01352	0.01364	0.01351	0.01367	0.01358	0.01353	0.01355	0.01352
1642.1	0.01551	0.01542	0.01592	0.01527	0.01523	0.0138	0.01345	0.01448		0.01438	0.0144	0.01417	0.0141	0.01433	0.01427	0.01426	0.01422		0.01432	0.01415	0.01417	0.0142			0.01389	0.01403	0.01389	0.01406	0.01397	0.01392	0.01393	0.01391
1641.38	0.01602	0.01592	0.01641	0.01573	0.01572	0.01412	0.01369	0.01457		0.0148	0.01483	0.01455	0.01448	0.0147	0.01465	0.01466	0.01463		0.01468	0.01451	0.01453	0.01456			0.01428	0.01443	0.01429	0.01448	0.01439	0.01433	0.01433	0.01432
1640.67	0.01661	0.01649	0.01696	0.01624	0.01627	0.01445	0.01395	0.01462		0.01525	0.01529	0.01495	0.01489	0.01508	0.01506	0.01508	0.01506		0.01506	0.01487	0.0149	0.01493			0.0147	0.01485	0.0147	0.01492	0.01483	0.01475	0.01475	0.01474
1639.96	0.01726	0.01712	0.01759	0.0168	0.01687	0.01479	0.01424	0.01465		0.01572	0.01577	0.01536	0.01531	0.01548	0.01547	0.01552	0.01551		0.01545	0.01525	0.01528	0.0153			0.01514	0.01529	0.01514	0.01539	0.01529	0.0152	0.01519	0.01518
1639.24	0.01793	0.01781	0.01825	0.01739	0.01749	0.01514	0.01455	0.01465		0.01622	0.01627	0.0158	0.01575	0.0159	0.01591	0.01598	0.01599		0.01586	0.01564	0.01567	0.01569			0.0156	0.01576	0.0156	0.01588	0.01579	0.01568	0.01565	0.01566
1638.53	0.01859	0.0185	0.01888	0.01796	0.0181	0.01551	0.01487	0.01463		0.01673	0.01678	0.01627	0.01622	0.01634	0.01636	0.01646	0.01649		0.01629	0.01605	0.01609	0.01612			0.01611	0.01626	0.0161	0.01641	0.01632	0.0162	0.01614	0.01616
1637.82	0.0192	0.01914	0.01946	0.01848	0.01867	0.01591	0.0152	0.01463		0.01726	0.01732	0.01677	0.01671	0.01681	0.01684	0.01697	0.01702		0.01674	0.0165	0.01653	0.01656			0.01666	0.01681	0.01664	0.01697	0.0169	0.01676	0.01667	0.01671
1637.1	0.01975	0.01967	0.01996	0.01894	0.01918	0.01634	0.01554	0.01465		0.0178	0.01786	0.01731	0.01724	0.0173	0.01733	0.0175	0.01757		0.01721	0.01697	0.01699	0.01703			0.01726	0.01741	0.01723	0.01757	0.0175	0.01739	0.01727	0.01733
1636.39	0.02018	0.02007	0.02034	0.01931	0.01958	0.0168	0.01587	0.01469		0.01835	0.01842	0.01789	0.01781	0.01781	0.01785	0.01806	0.01815		0.0177	0.01747	0.01749	0.01753			0.01794	0.01809	0.01789	0.01822	0.01817	0.01809	0.01795	0.01802
1635.68	0.02047	0.02037	0.02057	0.01958	0.01987	0.01731	0.01618	0.01471		0.01892	0.019	0.01852	0.01844	0.01837	0.01841	0.01866	0.01877		0.01823	0.01803	0.01802	0.01808			0.01874	0.01886	0.01865	0.01896	0.01894	0.01891	0.01873	0.01882
1634.97	0.02066	0.02059	0.02069	0.01979	0.02007	0.01784	0.01648	0.01475		0.0195	0.01958	0.01916	0.01909	0.01893	0.01897	0.01928	0.01941		0.01878	0.01862	0.01859	0.01865			0.0196	0.01969	0.01948	0.01975	0.01976	0.01979	0.01956	0.0197
1634.25	0.02083	0.02078	0.0208	0.02	0.02026	0.01835	0.01679	0.01486		0.02003	0.02011	0.01975	0.01971	0.01944	0.0195	0.01985	0.02		0.01929	0.01917	0.01912	0.01919			0.02041	0.02047	0.02026	0.02049	0.02051	0.02061	0.02035	0.02052
1633.54	0.02103	0.021	0.02101	0.02023	0.0205	0.01881	0.0171	0.01508		0.02051	0.02059	0.02027	0.02025	0.0199	0.01997	0.02036	0.02052		0.01973	0.01966	0.01959	0.01967			0.02111	0.02114	0.02093	0.02113	0.02115	0.02131	0.02102	0.02123
1632.83	0.02131	0.02127	0.02129	0.02053	0.02082	0.01924	0.01744	0.01538		0.02097	0.02103	0.02075	0.02073	0.02034	0.02041	0.02082	0.02099		0.02013	0.02011	0.02002	0.02009			0.02171	0.02171	0.02151	0.02168	0.02172	0.02192	0.0216	0.02183
1632.11	0.02168	0.02161	0.02165	0.0209	0.02121	0.01965	0.01779	0.01576		0.0214	0.02144	0.0212	0.02118	0.02076	0.02082	0.02127	0.02144		0.0205	0.02052	0.02041	0.02048			0.02222	0.02219	0.022	0.02217	0.02221	0.02242	0.02209	0.02233
1631.4	0.02211	0.02199	0.02205	0.02132	0.02164	0.02004	0.01818	0.0162		0.02183	0.02184	0.02164	0.02162	0.02119	0.02123	0.0217	0.02187		0.02086	0.02092	0.02079	0.02086			0.02262	0.02257	0.02241	0.02259	0.02263	0.02282	0.02248	0.02273
1630.69	0.02253	0.0224	0.02247	0.02175	0.02207	0.02045	0.01859	0.01671		0.02227	0.02225	0.02211	0.02206	0.02164	0.02166	0.02215	0.02232		0.02123	0.02133	0.02119	0.02126			0.02294	0.02287	0.02274	0.02294	0.02298	0.02314	0.02279	0.02305
1629.97	0.02289	0.02277	0.02286	0.02215	0.02245	0.0209	0.01903	0.01729		0.02273	0.02268	0.02259	0.02252	0.02212	0.02211	0.02263	0.02279		0.02163	0.02177	0.02163	0.02169			0.0232	0.0231	0.02303	0.02326	0.02328	0.02341	0.02305	0.02331
1629.26	0.02318	0.02309	0.02317	0.02247	0.02274	0.02136	0.01952	0.01794		0.02319	0.02311	0.02309	0.02299	0.02263	0.02257	0.02312	0.02328		0.02204	0.02223	0.02208	0.02213			0.02343	0.02329	0.02328	0.02352	0.02353	0.02364	0.02325	0.02353
1628.55	0.02339	0.02331	0.02339	0.0227	0.02295	0.02183	0.02009	0.01868		0.02363	0.02352	0.02358	0.02344	0.02312	0.02304	0.02361	0.02376		0.02244	0.02268	0.02255	0.02258			0.02362	0.02343	0.0235	0.02375	0.02373	0.02383	0.02342	0.02371
1627.83	0.0235	0.02344	0.02353	0.02285	0.02308	0.02227	0.02075	0.01951		0.02402	0.02389	0.024	0.02385	0.02357	0.02346	0.02404	0.02419		0.02282	0.02311	0.02299	0.023			0.02377	0.02354	0.02371	0.02393	0.02387	0.02398	0.02357	0.02385
1627.12	0.02348	0.02346	0.02358	0.02292	0.02314	0.02265	0.02147	0.02039		0.02431	0.02416	0.02434	0.02418	0.02395	0.02381	0.02439	0.02455		0.02313	0.02347	0.02338	0.02335			0.02388	0.02361	0.02389	0.02406	0.02396	0.02408	0.02369	0.02395
1626.41	0.02335	0.02336	0.02353	0.02291	0.02309	0.02296	0.02224	0.02123		0.02449	0.02432	0.02456	0.02441	0.02421	0.02406	0.02463	0.0248		0.02336	0.02375	0.02367	0.02363			0.02396	0.02367	0.02405	0.02414	0.024	0.02416	0.02379	0.02402
1625.7	0.02312	0.02314	0.02337	0.02281	0.02291	0.02316	0.023	0.02196		0.02454	0.02436	0.02467	0.02452	0.02435	0.02419	0.02475	0.02492		0.02349	0.02391	0.02386	0.0238			0.02401	0.0237	0.02417	0.02416	0.02399	0.02419	0.02386	0.02406
1624.98	0.02278	0.02277	0.02307	0.02256	0.02258	0.02326	0.0237	0.02253		0.02444	0.02428	0.02464	0.02449	0.02435	0.02417	0.02472	0.0249		0.02351	0.02396	0.02392	0.02386			0.02403	0.0237	0.02425	0.02411	0.02394	0.02419	0.0239	0.02405
1624.27	0.0223	0.02227	0.02264	0.02216	0.0221	0.02326	0.02425	0.0229		0.0242	0.02406	0.02448	0.02433	0.0242	0.02402	0.02455	0.02473		0.02342	0.02388	0.02387	0.0238			0.024	0.02367	0.02428	0.024	0.02385	0.02413	0.02389	0.024
1623.56	0.02169	0.02164	0.02205	0.02161	0.0215	0.02314	0.02461	0.02305		0.02382	0.0237	0.02418	0.02402	0.02391	0.02372	0.02424	0.02441		0.0232	0.02368	0.02369	0.02362			0.02391	0.02359	0.02423	0.02381	0.02369	0.024	0.02383	0.02389
1622.84	0.02098	0.02092	0.02136	0.02098	0.02083	0.02292	0.02477	0.02303		0.02332	0.02322	0.02374	0.02359	0.02349	0.0233	0.02378	0.02395		0.02288	0.02337	0.02339	0.02331			0.02375	0.02345	0.0241	0.02354	0.02346	0.0238	0.0237	0.02372
1622.13	0.02023	0.02015	0.02059	0.0203	0.02013	0.02261	0.02476	0.02288		0.02273	0.02265	0.02319	0.02307	0.02297	0.02278	0.02322	0.02339		0.02246	0.02296	0.02298	0.0229			0.0235	0.02325	0.02388	0.0232	0.02315	0.02353	0.02351	0.02348
1621.42	0.01941	0.01933	0.01978	0.01958	0.01939	0.02223	0.02458	0.02262		0.02206	0.02201	0.02256	0.02247	0.02236	0.02219	0.02258	0.02275		0.02195	0.02246	0.02248	0.0224			0.02315	0.02295	0.02354	0.02276	0.02276	0.02315	0.02322	0.02314
1620.7	0.01851	0.01847	0.01892	0.01881	0.01859	0.02175	0.02425	0.02225		0.02131	0.02129	0.02184	0.02178	0.02168	0.02153	0.02184	0.02201		0.02136	0.02186	0.02188	0.0218			0.02267	0.02251	0.02306	0.0222	0.02227	0.02264	0.02279	0.02266
1619.99	0.01757	0.01759	0.01803	0.01799	0.01772	0.02118	0.02378	0.02178		0.02049	0.0205	0.02104	0.02101	0.02091	0.02079	0.02101	0.02119		0.02068	0.02115	0.02119	0.02111			0.02205	0.02192	0.02242	0.02153	0.02166	0.02198	0.0222	0.02204
1619.28	0.01664	0.01669	0.01714	0.01713	0.01682	0.02052	0.02319	0.02123		0.01959	0.01964	0.02016	0.02016	0.02006	0.01998	0.02011	0.0203		0.01991	0.02036	0.0204	0.02032			0.0213	0.0212	0.02165	0.02074	0.02094	0.02119	0.02148	0.02128
1618.57	0.01576	0.0158	0.01627	0.01625	0.01593	0.01978	0.02248	0.02064		0.01864	0.01873	0.01922	0.01926	0.01916	0.01911	0.01915	0.01934		0.01907	0.01949	0.01953	0.01944			0.02046	0.02037	0.02078	0.01988	0.02012	0.02031	0.02067	0.02044
1617.85	0.0149	0.01489	0.01536	0.01537	0.01506	0.01895	0.02166	0.01998		0.01763	0.01777	0.01822	0.01828	0.01819	0.01818	0.01813	0.01832		0.01815	0.01853	0.01858	0.01849			0.01951	0.01944	0.0198	0.01893	0.0192	0.01932	0.01976	0.0195
1617.14	0.01404	0.01398	0.0144	0.01447	0.01415	0.01802	0.02069	0.01921		0.01653	0.01671	0.01713	0.01721	0.01711	0.01714	0.01701	0.0172		0.01712	0.01747	0.01752	0.01743			0.01841	0.01834	0.01866	0.01785	0.01816	0.01817	0.01867	0.01839
1616.43	0.01316	0.01306	0.01339	0.01356	0.01322	0.017	0.01961	0.01829		0.01535	0.01557	0.01594	0.01605	0.01596	0.01604	0.01582	0.01601		0.01602	0.01634	0.01639	0.0163			0.01718	0.0171	0.01738	0.01665	0.017	0.01689	0.01741	0.01713
1615.71	0.01228	0.01218	0.01242	0.01266	0.01231	0.01598	0.01852	0.01734		0.01421	0.01445	0.01477	0.01491	0.01482	0.01495	0.01465	0.01485		0.01493	0.01521	0.01527	0.01517			0.01596	0.01587	0.01612	0.01547	0.01586	0.01563	0.01616	0.01588
1615	0.01142	0.01135	0.01154	0.0118	0.01145	0.01498	0.01745	0.01641		0.01314	0.0134	0.01368	0.01385	0.01376	0.01393	0.01356	0.01375		0.01388	0.01412	0.01419	0.0141			0.01483	0.01472	0.01494	0.01436	0.01478	0.01447	0.01499	0.01472
1614.29	0.01056	0.01053	0.01071	0.01095	0.0106	0.01397	0.01639	0.01548		0.0121	0.01237	0.01261	0.01281	0.01272	0.01292	0.0125	0.01269		0.01284	0.01306	0.01313	0.01303			0.01371	0.01359	0.0138	0.01327	0.0137	0.01334	0.01385	0.01359
1613.57	0.00967	0.00968	0.00986	0.01008	0.00975	0.01294	0.01529	0.01451		0.01108	0.01135	0.01156	0.01178	0.01168	0.0119	0.01144	0.01163		0.01179	0.01199	0.01205	0.01195			0.01256	0.01244	0.01264	0.01217	0.01259	0.01219	0.01271	0.01245
1612.86	0.00877	0.00884	0.00901	0.00921	0.00891	0.0119	0.01414	0.01348		0.01007	0.01034	0.01052	0.01075	0.01065	0.01089	0.0104	0.01058		0.01075	0.01094	0.01099	0.01088			0.01141	0.0113	0.01148	0.01107	0.01148	0.01105	0.01156	0.0113
1612.15	0.00793	0.00803	0.00819	0.00838	0.00809	0.01088	0.01298	0.01241		0.0091	0.00937	0.00952	0.00976	0.00966	0.0099	0.00941	0.00958		0.00975	0.00991	0.00996	0.00985			0.01029	0.0102	0.01036	0.01	0.01039	0.00994	0.01044	0.01018
1611.44	0.00718	0.00727	0.00744	0.00762	0.00734	0.00988	0.01184	0.01135		0.0082	0.00846	0.00858	0.00882	0.00871	0.00896	0.00847	0.00863		0.0088	0.00893	0.00898	0.00887			0.00923	0.00914	0.00929	0.00898	0.00934	0.00888	0.00936	0.00912
1610.72	0.00653	0.0066	0.00675	0.00693	0.00666	0.00893	0.01076	0.0103		0.00737	0.00762	0.0077	0.00794	0.00784	0.00809	0.0076	0.00775		0.0079	0.00801	0.00805	0.00796			0.00823	0.00815	0.00829	0.00803	0.00835	0.0079	0.00835	0.00812
1610.01	0.00597	0.00602	0.00614	0.0063	0.00605	0.00803	0.00972	0.00927		0.00661	0.00686	0.00689	0.00714	0.00704	0.00729	0.00681	0.00695		0.00707	0.00715	0.00719	0.00711			0.00731	0.00723	0.00735	0.00714	0.00744	0.00699	0.0074	0.00719
1609.3	0.00546	0.0055	0.00556	0.00572	0.00548	0.0072	0.00873	0.0083		0.00592	0.00618	0.00616	0.00642	0.00631	0.00657	0.00609	0.00624		0.00631	0.00637	0.00641	0.00633			0.00647	0.00639	0.0065	0.00633	0.0066	0.00615	0.00654	0.00633
1608.58	0.00499	0.005	0.00503	0.00517	0.00496	0.00643	0.00782	0.00741		0.00531	0.00557	0.0055	0.00578	0.00565	0.00592	0.00546	0.0056		0.00562	0.00566	0.0057	0.00563			0.00571	0.00564	0.00574	0.0056	0.00584	0.0054	0.00576	0.00556
1607.87	0.00452	0.0045	0.00451	0.00466	0.00447	0.00573	0.007	0.0066		0.00476	0.00502	0.00492	0.00521	0.00506	0.00533	0.00488	0.00503		0.00499	0.00502	0.00506	0.005			0.00504	0.00496	0.00505	0.00493	0.00515	0.00472	0.00507	0.00488
1607.16	0.00404	0.00401	0.00399	0.00416	0.00401	0.0051	0.00625	0.00587		0.00425	0.00452	0.00439	0.00468	0.00452	0.00479	0.00435	0.00451		0.00443	0.00443	0.00448	0.00443			0.00443	0.00435	0.00444	0.00434	0.00452	0.00412	0.00445	0.00427
1606.44	0.00357	0.00353	0.00349	0.00368	0.00356	0.00452	0.00558	0.00519		0.00378	0.00404	0.00391	0.0042	0.00402	0.00429	0.00387	0.00403		0.00391	0.00391	0.00396	0.00391			0.00388	0.0038	0.00389	0.0038	0.00396	0.00359	0.00389	0.00373
1605.73	0.00311	0.00307	0.00304	0.00325	0.00312	0.00399	0.00497	0.00458		0.00334	0.00359	0.00346	0.00375	0.00356	0.00381	0.00342	0.00358		0.00344	0.00344	0.00348	0.00344			0.00338	0.00331	0.00339	0.00331	0.00345	0.00312	0.00339	0.00324
1605.02	0.00271	0.00263	0.00262	0.00284	0.00268	0.00351	0.00441	0.00402		0.00292	0.00317	0.00305	0.00332	0.00312	0.00337	0.003	0.00316		0.00301	0.00301	0.00304	0.00301			0.00293	0.00287	0.00293	0.00286	0.003	0.0027	0.00294	0.0028
1604.31	0.00234	0.00222	0.00221	0.00246	0.00227	0.00308	0.00389	0.0035		0.00254	0.00277	0.00267	0.00292	0.00272	0.00295	0.00261	0.00277		0.00262	0.00262	0.00265	0.00262			0.00252	0.00246	0.00252	0.00245	0.00259	0.00231	0.00253	0.00241
1603.59	0.00197	0.00185	0.00182	0.00209	0.0019	0.00268	0.0034	0.00302		0.00218	0.0024	0.00232	0.00255	0.00235	0.00256	0.00225	0.0024		0.00226	0.00227	0.00229	0.00227			0.00215	0.00209	0.00215	0.00208	0.00221	0.00196	0.00215	0.00205
1602.88	0.00158	0.00151	0.00149	0.00174	0.00156	0.00231	0.00294	0.00258		0.00186	0.00205	0.002	0.00221	0.00201	0.0022	0.00192	0.00206		0.00194	0.00196	0.00197	0.00195			0.00182	0.00176	0.00182	0.00175	0.00185	0.00165	0.00181	0.00173
1602.17	0.00121	0.00123	0.00122	0.00143	0.00124	0.00198	0.00252	0.00217		0.00157	0.00174	0.0017	0.00189	0.0017	0.00187	0.00162	0.00174		0.00165	0.00167	0.00167	0.00165			0.00152	0.00146	0.00152	0.00145	0.00154	0.00138	0.00152	0.00144
1601.45	0.000913571	0.000981565	0.00101	0.00116	0.000964179	0.00168	0.00216	0.0018		0.0013	0.00145	0.00143	0.0016	0.00143	0.00156	0.00136	0.00146		0.00138	0.00141	0.00141	0.00139			0.00127	0.00121	0.00126	0.0012	0.00126	0.00114	0.00126	0.00119
1600.74	0.0006927	0.000765879	0.000819883	0.000907836	0.000735342	0.0014	0.00182	0.00147		0.00106	0.00119	0.00119	0.00134	0.00117	0.00129	0.00111	0.0012		0.00114	0.00116	0.00117	0.00115			0.00103	0.000980682	0.00103	0.000971359	0.00103	0.000931094	0.00103	0.000973349
1600.03	0.000528817	0.000578994	0.00065108	0.000696233	0.000559758	0.00115	0.00151	0.0012		0.000844705	0.000952285	0.000961478	0.00109	0.000942669	0.00104	0.000892325	0.000966703		0.000924839	0.000947976	0.000946953	0.000935411			0.000821325	0.000786443	0.000829912	0.000774237	0.000822003	0.000746813	0.000822637	0.000781083
1599.31	0.000392618	0.000424643	0.000508892	0.000530116	0.000436035	0.000922923	0.00121	0.000987693		0.000654521	0.000742459	0.000761215	0.00086199	0.000738209	0.000821636	0.000693357	0.000759773		0.000730457	0.00075346	0.000749188	0.000740324			0.00063578	0.000617359	0.000654257	0.000602906	0.0006449	0.000583693	0.000643069	0.00061319
1598.6	0.00027068	0.00030634	0.000383894	0.000401472	0.000349393	0.00071833	0.000940104	0.000795224		0.000491974	0.000560972	0.000585083	0.000660752	0.000559378	0.000631672	0.000521331	0.000579268		0.000558658	0.000580045	0.000573869	0.000566512			0.000474727	0.000468592	0.000500778	0.000453679	0.000491187	0.000440524	0.000487905	0.000464898
1597.89	0.000168023	0.000220479	0.000261086	0.00029461	0.000279672	0.00053565	0.000692626	0.000591145		0.000357296	0.000408439	0.000432399	0.000486781	0.000406502	0.000464456	0.000377375	0.000425003		0.000411189	0.000428303	0.000422727	0.000415507			0.000338612	0.000340062	0.000367456	0.000326079	0.000358372	0.000318456	0.000357117	0.000335404
1597.17	9.70671e-05	0.00015693	0.000147774	0.000205274	0.000216072	0.000373972	0.000479006	0.000385283		0.000246687	0.000281612	0.000299658	0.000337427	0.000277641	0.000317221	0.000257273	0.000293446		0.000284562	0.000296219	0.000292113	0.000284962			0.000225704	0.000231318	0.000251448	0.000219233	0.000243961	0.000215242	0.000246822	0.000225152
1596.46	6.25202e-05	0.000106055	7.16727e-05	0.000132918	0.000156078	0.000231425	0.000299319	0.000209868		0.000153895	0.000174659	0.000184212	0.000208179	0.000170057	0.000190449	0.000156264	0.000180443		0.000173963	0.000180911	0.000177878	0.000171915			0.000133568	0.000139781	0.000150864	0.000130984	0.000146658	0.000127654	0.000151553	0.000133699
1595.75	4.22483e-05	5.67875e-05	3.37344e-05	6.71665e-05	8.82582e-05	0.000106986	0.000141419	8.29834e-05		7.33605e-05	8.24229e-05	8.68945e-05	9.65297e-05	8.1318e-05	8.56348e-05	7.18489e-05	8.36895e-05		7.88384e-05	8.22594e-05	8.05325e-05	7.69363e-05			6.02431e-05	6.35012e-05	6.70025e-05	5.9268e-05	6.63859e-05	5.60033e-05	6.95069e-05	6.00232e-05
1595.04	0	0	0	0	0	0	0	0		0	0	7.42904e-06	0	6.83649e-06	0	0	0		0	0	0	0			0	0	0	0	0	0	0	0

## Sheet: Derivatives
XDP	I	II	III	IV	V	VI	VII	VIII		Type 1 24h	Type 1 48h	Type 2 24h	Type 2 48h	Type 3 24h	Type 3 48h	Type 4 24h	Type 4 48h		Type 1 reseed	Type 2 reseed	Type 3 reseed	Type 4 reseed
1699.85	8.10341e-06	5.877e-06	3.36564e-06	8.17046e-06	1.05611e-05	6.99301e-06	1.00525e-05	1.27272e-05		6.16646e-06	5.66778e-06	4.36448e-06	5.8818e-06	5.5958e-06	6.26429e-06	5.79464e-06	5.62239e-06		6.30645e-06	6.11447e-06	6.39988e-06	6.06541e-06
1699.14	9.00315e-06	6.42989e-06	5.02732e-06	7.91432e-06	1.02162e-05	6.949e-06	8.89714e-06	1.29005e-05		6.02593e-06	5.5359e-06	4.18984e-06	5.56703e-06	5.50096e-06	6.17672e-06	5.53883e-06	5.33976e-06		6.26295e-06	6.14978e-06	6.35113e-06	6.0626e-06
1698.42	9.4255e-06	7.18443e-06	6.87302e-06	7.15114e-06	9.06477e-06	6.66193e-06	6.94008e-06	1.2017e-05		5.75414e-06	5.27493e-06	3.99707e-06	5.15131e-06	5.35361e-06	6.05373e-06	5.21423e-06	4.96646e-06		6.05606e-06	6.02354e-06	6.20467e-06	5.97762e-06
1697.71	9.2787e-06	7.94476e-06	8.50791e-06	5.98661e-06	7.28304e-06	6.16022e-06	4.49152e-06	1.03038e-05		5.35169e-06	4.84285e-06	3.68036e-06	4.65844e-06	5.08581e-06	5.85441e-06	4.79206e-06	4.53202e-06		5.67346e-06	5.70756e-06	5.93798e-06	5.74715e-06
1697	8.56638e-06	8.24018e-06	9.47612e-06	4.84423e-06	5.56513e-06	5.49918e-06	2.14699e-06	8.47736e-06		4.80055e-06	4.23682e-06	3.18664e-06	4.10959e-06	4.60476e-06	5.43969e-06	4.18029e-06	4.02808e-06		5.07226e-06	5.16868e-06	5.43333e-06	5.22114e-06
1696.29	7.46239e-06	7.93291e-06	9.63897e-06	4.0395e-06	4.43094e-06	4.77459e-06	3.12502e-07	7.01498e-06		4.16634e-06	3.59277e-06	2.68499e-06	3.5637e-06	3.97562e-06	4.79971e-06	3.42462e-06	3.49179e-06		4.30743e-06	4.48065e-06	4.68922e-06	4.42159e-06
1695.57	6.22727e-06	7.2699e-06	9.09223e-06	3.61121e-06	3.91911e-06	4.11021e-06	-9.34102e-07	5.89102e-06		3.57141e-06	3.09686e-06	2.42375e-06	3.10376e-06	3.36872e-06	4.05502e-06	2.70606e-06	3.01256e-06		3.55081e-06	3.81553e-06	3.8796e-06	3.57222e-06
1694.86	5.10041e-06	6.59502e-06	8.04733e-06	3.36193e-06	3.76862e-06	3.60342e-06	-1.70921e-06	4.76879e-06		3.11915e-06	2.86214e-06	2.54375e-06	2.78618e-06	2.92549e-06	3.34944e-06	2.20867e-06	2.67082e-06		2.97629e-06	3.32845e-06	3.21359e-06	2.93485e-06
1694.15	4.19667e-06	6.03423e-06	6.69243e-06	3.09752e-06	3.75543e-06	3.32234e-06	-2.10825e-06	3.37081e-06		2.87856e-06	2.91746e-06	3.03927e-06	2.65038e-06	2.72086e-06	2.79973e-06	2.04427e-06	2.52575e-06		2.70057e-06	3.11648e-06	2.83723e-06	2.687e-06
1693.43	3.52864e-06	5.47834e-06	5.17169e-06	2.82226e-06	3.87694e-06	3.31311e-06	-2.09523e-06	1.72661e-06		2.87905e-06	3.23424e-06	3.79237e-06	2.73001e-06	2.76925e-06	2.47688e-06	2.23186e-06	2.6118e-06		2.77895e-06	3.22533e-06	2.80926e-06	2.87862e-06
1692.72	3.11839e-06	4.8916e-06	3.70787e-06	2.66267e-06	4.28587e-06	3.58498e-06	-1.56127e-06	1.15484e-07		3.10062e-06	3.73865e-06	4.63344e-06	3.03459e-06	3.02737e-06	2.40002e-06	2.71187e-06	2.92024e-06		3.20626e-06	3.6464e-06	3.10938e-06	3.44926e-06
1692.01	3.0595e-06	4.48075e-06	2.58794e-06	2.71229e-06	5.07051e-06	4.12012e-06	-4.18295e-07	-1.14975e-06		3.52079e-06	4.3625e-06	5.43519e-06	3.56433e-06	3.44611e-06	2.5777e-06	3.4152e-06	3.4334e-06		3.94175e-06	4.33184e-06	3.68508e-06	4.29668e-06
1691.29	3.43823e-06	4.48982e-06	1.97979e-06	3.0298e-06	6.13106e-06	4.88108e-06	1.35422e-06	-1.82819e-06		4.1398e-06	5.07263e-06	6.14169e-06	4.30733e-06	4.00018e-06	3.0205e-06	4.29316e-06	4.14665e-06		4.9183e-06	5.20528e-06	4.47421e-06	5.31023e-06
1690.58	4.2747e-06	4.94728e-06	1.94758e-06	3.71588e-06	7.28427e-06	5.80262e-06	3.7256e-06	-1.71903e-06		4.9402e-06	5.84407e-06	6.73001e-06	5.20877e-06	4.66637e-06	3.706e-06	5.28716e-06	5.03338e-06		6.03985e-06	6.17383e-06	5.39706e-06	6.37756e-06
1689.87	5.53907e-06	5.71186e-06	2.64571e-06	4.85596e-06	8.42157e-06	6.81922e-06	6.59706e-06	-6.9505e-07		5.88751e-06	6.66918e-06	7.23445e-06	6.20364e-06	5.44172e-06	4.61257e-06	6.35032e-06	6.04853e-06		7.22324e-06	7.1878e-06	6.3948e-06	7.43981e-06
1689.15	7.10032e-06	6.60561e-06	4.19565e-06	6.40491e-06	9.5135e-06	7.87512e-06	9.73767e-06	1.16363e-06		6.93119e-06	7.54483e-06	7.72901e-06	7.2378e-06	6.32395e-06	5.71734e-06	7.44272e-06	7.13243e-06		8.40387e-06	8.23259e-06	7.43582e-06	8.47919e-06
1688.44	8.73287e-06	7.51083e-06	6.38154e-06	8.11317e-06	1.04815e-05	8.85435e-06	1.27387e-05	3.48578e-06		7.93783e-06	8.37037e-06	8.19734e-06	8.17914e-06	7.2075e-06	6.88519e-06	8.43806e-06	8.14254e-06		9.4426e-06	9.20181e-06	8.41693e-06	9.39548e-06
1687.73	1.03484e-05	8.60099e-06	8.81334e-06	9.49982e-06	1.10711e-05	9.56853e-06	1.50353e-05	5.62971e-06		8.73002e-06	8.95883e-06	8.52837e-06	8.80694e-06	7.922e-06	7.90856e-06	9.16256e-06	8.87085e-06		1.01294e-05	9.88665e-06	9.16408e-06	1.0033e-05
1687.02	1.19898e-05	9.99024e-06	1.09709e-05	1.03007e-05	1.11662e-05	9.93958e-06	1.6222e-05	7.19217e-06		9.22921e-06	9.21682e-06	8.62882e-06	9.05329e-06	8.39167e-06	8.64738e-06	9.5479e-06	9.24897e-06		1.03942e-05	1.0203e-05	9.61269e-06	1.03355e-05
1686.3	1.35494e-05	1.13264e-05	1.23701e-05	1.07393e-05	1.0986e-05	1.00723e-05	1.62873e-05	8.43585e-06		9.47893e-06	9.21773e-06	8.4723e-06	9.09218e-06	8.65347e-06	9.06489e-06	9.63533e-06	9.39287e-06		1.03549e-05	1.02594e-05	9.82532e-06	1.03408e-05
1685.59	1.47319e-05	1.2407e-05	1.33533e-05	1.08644e-05	1.05228e-05	1.00562e-05	1.5304e-05	9.77823e-06		9.58424e-06	9.10937e-06	8.18281e-06	9.07362e-06	8.82834e-06	9.29175e-06	9.52957e-06	9.39487e-06		1.00991e-05	1.01349e-05	9.83315e-06	1.0121e-05
1684.88	1.5197e-05	1.30453e-05	1.43006e-05	1.0659e-05	9.76618e-06	9.94961e-06	1.35438e-05	1.17307e-05		9.60637e-06	8.99425e-06	7.94505e-06	9.04569e-06	9.0299e-06	9.46393e-06	9.31668e-06	9.27901e-06		9.66914e-06	9.85653e-06	9.65767e-06	9.72952e-06
1684.16	1.47142e-05	1.28126e-05	1.47369e-05	1.04106e-05	9.0622e-06	9.88419e-06	1.16226e-05	1.4865e-05		9.56752e-06	8.93813e-06	7.90537e-06	9.07392e-06	9.3441e-06	9.63627e-06	9.0743e-06	9.11853e-06		9.18364e-06	9.52721e-06	9.42006e-06	9.2443e-06
1683.45	1.33827e-05	1.17332e-05	1.42048e-05	1.02867e-05	8.59682e-06	1.00156e-05	1.00342e-05	1.90961e-05		9.54576e-06	9.0331e-06	8.19841e-06	9.24646e-06	9.89018e-06	9.92118e-06	8.96684e-06	9.06352e-06		8.84803e-06	9.33233e-06	9.3403e-06	8.88399e-06
1682.74	1.16196e-05	1.03421e-05	1.28966e-05	1.02129e-05	8.25313e-06	1.04402e-05	8.93425e-06	2.36753e-05		9.63947e-06	9.32976e-06	8.83762e-06	9.60794e-06	1.07239e-05	1.04268e-05	9.14881e-06	9.24606e-06		8.85287e-06	9.4283e-06	9.59946e-06	8.90099e-06
1682.02	9.95933e-06	9.10128e-06	1.14261e-05	1.0181e-05	8.03467e-06	1.11487e-05	8.37514e-06	2.78875e-05		9.9022e-06	9.78534e-06	9.66942e-06	1.01349e-05	1.17369e-05	1.11251e-05	9.6213e-06	9.68395e-06		9.23985e-06	9.81688e-06	1.01721e-05	9.34409e-06
1681.31	8.90353e-06	8.38448e-06	1.05922e-05	1.02953e-05	8.16621e-06	1.20761e-05	8.39694e-06	3.11824e-05		1.04423e-05	1.04403e-05	1.06582e-05	1.08397e-05	1.28269e-05	1.19936e-05	1.03726e-05	1.03697e-05		9.95991e-06	1.04378e-05	1.09247e-05	1.01268e-05
1680.6	8.78628e-06	8.52702e-06	1.08625e-05	1.07492e-05	8.92643e-06	1.32399e-05	8.96875e-06	3.29254e-05		1.14756e-05	1.15372e-05	1.20349e-05	1.18867e-05	1.40612e-05	1.31349e-05	1.15453e-05	1.1433e-05		1.10879e-05	1.1399e-05	1.18955e-05	1.12882e-05
1679.89	9.69074e-06	9.62307e-06	1.20615e-05	1.17653e-05	1.04966e-05	1.47051e-05	9.9943e-06	3.24849e-05		1.31416e-05	1.32924e-05	1.39936e-05	1.345e-05	1.55267e-05	1.46088e-05	1.32751e-05	1.30347e-05		1.27759e-05	1.29009e-05	1.32527e-05	1.29527e-05
1679.17	1.15266e-05	1.1685e-05	1.39243e-05	1.33138e-05	1.27632e-05	1.63995e-05	1.13313e-05	2.94678e-05		1.53563e-05	1.56517e-05	1.64435e-05	1.54736e-05	1.71576e-05	1.63044e-05	1.54949e-05	1.51401e-05		1.4996e-05	1.49535e-05	1.50103e-05	1.51064e-05
1678.46	1.40879e-05	1.46155e-05	1.6324e-05	1.51241e-05	1.54333e-05	1.81148e-05	1.28353e-05	2.39921e-05		1.78677e-05	1.83324e-05	1.90861e-05	1.77142e-05	1.87722e-05	1.80032e-05	1.79657e-05	1.75278e-05		1.75057e-05	1.73433e-05	1.69784e-05	1.75448e-05
1677.75	1.70067e-05	1.79796e-05	1.89958e-05	1.68417e-05	1.81189e-05	1.96118e-05	1.42208e-05	1.66292e-05		2.03653e-05	2.09841e-05	2.15772e-05	1.99131e-05	2.01708e-05	1.94981e-05	2.03921e-05	1.99182e-05		1.99848e-05	1.97708e-05	1.89125e-05	1.99821e-05
1677.03	1.97711e-05	2.10402e-05	2.13984e-05	1.80786e-05	2.03118e-05	2.06524e-05	1.50291e-05	8.14272e-06		2.25098e-05	2.32482e-05	2.35662e-05	2.18309e-05	2.11437e-05	2.06129e-05	2.2447e-05	2.2013e-05		2.21101e-05	2.19097e-05	2.0585e-05	2.21168e-05
1676.32	2.19288e-05	2.30967e-05	2.29713e-05	1.85796e-05	2.1602e-05	2.10197e-05	1.49688e-05	-5.10772e-07		2.39658e-05	2.4783e-05	2.47125e-05	2.32187e-05	2.14764e-05	2.11778e-05	2.37875e-05	2.35128e-05		2.35681e-05	2.34168e-05	2.17575e-05	2.36227e-05
1675.61	2.31792e-05	2.37541e-05	2.33567e-05	1.83118e-05	2.18171e-05	2.05355e-05	1.40527e-05	-8.26287e-06		2.4442e-05	2.52934e-05	2.47406e-05	2.3804e-05	2.09871e-05	2.10229e-05	2.41099e-05	2.41392e-05		2.4047e-05	2.3952e-05	2.21451e-05	2.41447e-05
1674.89	2.32288e-05	2.28708e-05	2.24007e-05	1.72684e-05	2.08362e-05	1.90388e-05	1.22943e-05	-1.4288e-05		2.36861e-05	2.45306e-05	2.34605e-05	2.32844e-05	1.95287e-05	1.99672e-05	2.31768e-05	2.36246e-05		2.32504e-05	2.32156e-05	2.14399e-05	2.33469e-05
1674.18	2.1703e-05	2.03175e-05	1.99455e-05	1.53416e-05	1.85122e-05	1.64032e-05	9.57556e-06	-1.81572e-05		2.15021e-05	2.23215e-05	2.07769e-05	2.13956e-05	1.6993e-05	1.78323e-05	2.08325e-05	2.17459e-05		2.09844e-05	2.10207e-05	1.94098e-05	2.10123e-05
1673.47	1.82794e-05	1.59129e-05	1.58007e-05	1.24105e-05	1.48238e-05	1.25928e-05	5.83869e-06	-1.97447e-05		1.7802e-05	1.86174e-05	1.67191e-05	1.80032e-05	1.33482e-05	1.44924e-05	1.7023e-05	1.83809e-05		1.72287e-05	1.73495e-05	1.59813e-05	1.71167e-05
1672.76	1.29047e-05	9.69485e-06	9.97094e-06	8.39405e-06	9.87657e-06	7.69471e-06	1.13891e-06	-1.93023e-05		1.26471e-05	1.35116e-05	1.14583e-05	1.31397e-05	8.69073e-06	9.95836e-06	1.18381e-05	1.35416e-05		1.21372e-05	1.23508e-05	1.12709e-05	1.18564e-05
1672.04	5.94021e-06	2.25173e-06	2.9287e-06	3.20232e-06	3.70487e-06	1.92423e-06	-4.45369e-06	-1.75704e-05		6.28335e-06	7.23935e-06	5.28705e-06	7.0089e-06	3.27695e-06	4.45751e-06	5.56493e-06	7.41504e-06		6.01169e-06	6.30957e-06	5.59223e-06	5.63814e-06
1671.33	-1.9559e-06	-5.54347e-06	-4.56194e-06	-3.13598e-06	-3.5806e-06	-4.39723e-06	-1.06939e-05	-1.53771e-05		-9.01471e-07	1.28355e-07	-1.491e-06	-4.32692e-08	-2.56504e-06	-1.6368e-06	-1.37379e-06	3.62568e-07		-7.66085e-07	-4.26802e-07	-6.43444e-07	-1.06967e-06
1670.62	-1.01468e-05	-1.32143e-05	-1.19301e-05	-1.01856e-05	-1.13858e-05	-1.08938e-05	-1.68882e-05	-1.29685e-05		-8.49556e-06	-7.47014e-06	-8.64519e-06	-7.58355e-06	-8.58097e-06	-8.00323e-06	-8.58912e-06	-7.15948e-06		-7.83557e-06	-7.52762e-06	-7.11164e-06	-7.95451e-06
1669.9	-1.81889e-05	-2.05919e-05	-1.87115e-05	-1.72697e-05	-1.88933e-05	-1.71757e-05	-2.21378e-05	-1.01922e-05		-1.60523e-05	-1.51249e-05	-1.58466e-05	-1.51158e-05	-1.45217e-05	-1.43372e-05	-1.57079e-05	-1.46533e-05		-1.48518e-05	-1.46417e-05	-1.35717e-05	-1.47893e-05
1669.19	-2.5671e-05	-2.73253e-05	-2.44607e-05	-2.37308e-05	-2.55287e-05	-2.283e-05	-2.57639e-05	-7.07475e-06		-2.30375e-05	-2.22827e-05	-2.2552e-05	-2.20899e-05	-2.00178e-05	-2.022e-05	-2.22621e-05	-2.15807e-05		-2.13906e-05	-2.13092e-05	-1.96861e-05	-2.12107e-05
1668.48	-3.20456e-05	-3.28614e-05	-2.89046e-05	-2.8996e-05	-3.09519e-05	-2.74694e-05	-2.74716e-05	-3.95867e-06		-2.89313e-05	-2.84018e-05	-2.82052e-05	-2.79937e-05	-2.46825e-05	-2.52189e-05	-2.7776e-05	-2.74407e-05		-2.69882e-05	-2.70403e-05	-2.50228e-05	-2.67649e-05
1667.76	-3.66307e-05	-3.65855e-05	-3.18042e-05	-3.26839e-05	-3.49605e-05	-3.08117e-05	-2.73458e-05	-1.47085e-06		-3.33155e-05	-3.30469e-05	-3.23988e-05	-3.24352e-05	-2.82018e-05	-2.89711e-05	-3.18528e-05	-3.1834e-05		-3.12592e-05	-3.14405e-05	-2.918e-05	-3.10392e-05
1667.05	-3.88764e-05	-3.81611e-05	-3.29938e-05	-3.45491e-05	-3.73651e-05	-3.26787e-05	-2.5633e-05	-2.73671e-07		-3.58861e-05	-3.58952e-05	-3.49054e-05	-3.51256e-05	-3.03479e-05	-3.12055e-05	-3.41979e-05	-3.44525e-05		-3.39287e-05	-3.42175e-05	-3.18415e-05	-3.37207e-05
1666.34	-3.86693e-05	-3.78496e-05	-3.26389e-05	-3.43168e-05	-3.78219e-05	-3.30171e-05	-2.25157e-05	-6.10526e-07		-3.65378e-05	-3.68244e-05	-3.57405e-05	-3.59294e-05	-3.10851e-05	-3.18778e-05	-3.47508e-05	-3.51739e-05		-3.4894e-05	-3.52327e-05	-3.28826e-05	-3.47137e-05
1665.63	-3.63358e-05	-3.588e-05	-3.07118e-05	-3.21125e-05	-3.61574e-05	-3.20181e-05	-1.83613e-05	-2.34504e-06		-3.54033e-05	-3.59708e-05	-3.50557e-05	-3.50252e-05	-3.05787e-05	-3.11572e-05	-3.37238e-05	-3.42109e-05		-3.43324e-05	-3.4652e-05	-3.24982e-05	-3.41805e-05
1664.91	-3.23633e-05	-3.2036e-05	-2.68896e-05	-2.86054e-05	-3.26697e-05	-3.00399e-05	-1.38367e-05	-5.19439e-06		-3.2765e-05	-3.35995e-05	-3.29474e-05	-3.28147e-05	-2.90155e-05	-2.92779e-05	-3.14175e-05	-3.19566e-05		-3.25743e-05	-3.28487e-05	-3.10489e-05	-3.23946e-05
1664.2	-2.7223e-05	-2.65383e-05	-2.16685e-05	-2.42625e-05	-2.77353e-05	-2.73654e-05	-9.45839e-06	-8.54408e-06		-2.9026e-05	-3.00276e-05	-2.95764e-05	-2.9665e-05	-2.65749e-05	-2.65739e-05	-2.81441e-05	-2.87323e-05		-2.9885e-05	-3.01461e-05	-2.8809e-05	-2.96628e-05
1663.49	-2.13097e-05	-2.00908e-05	-1.60344e-05	-1.93506e-05	-2.18642e-05	-2.42003e-05	-5.58022e-06	-1.175e-05		-2.46471e-05	-2.56327e-05	-2.52575e-05	-2.58926e-05	-2.34435e-05	-2.33825e-05	-2.42125e-05	-2.48062e-05		-2.64826e-05	-2.6788e-05	-2.5946e-05	-2.62693e-05
1662.77	-1.50505e-05	-1.34014e-05	-1.06855e-05	-1.42342e-05	-1.57527e-05	-2.07171e-05	-2.51885e-06	-1.43572e-05		-2.00241e-05	-2.07928e-05	-2.03724e-05	-2.17576e-05	-1.97805e-05	-1.98941e-05	-1.98851e-05	-2.04305e-05		-2.256e-05	-2.29508e-05	-2.25493e-05	-2.24054e-05
1662.06	-9.05477e-06	-7.17515e-06	-6.1371e-06	-9.23023e-06	-9.96258e-06	-1.7045e-05	-3.46074e-07	-1.58771e-05		-1.54646e-05	-1.58568e-05	-1.53474e-05	-1.7445e-05	-1.578e-05	-1.62023e-05	-1.54128e-05	-1.58535e-05		-1.83063e-05	-1.87844e-05	-1.87076e-05	-1.8238e-05
1661.35	-4.0243e-06	-2.15036e-06	-2.89608e-06	-4.51057e-06	-4.8157e-06	-1.33306e-05	1.16622e-06	-1.57887e-05		-1.12581e-05	-1.11957e-05	-1.06793e-05	-1.31616e-05	-1.17759e-05	-1.24668e-05	-1.11268e-05	-1.13828e-05		-1.40049e-05	-1.45353e-05	-1.46521e-05	-1.40522e-05
1660.63	-3.85804e-07	1.33045e-06	-1.06689e-06	-3.24799e-07	-5.95501e-07	-9.76061e-06	2.2392e-06	-1.39773e-05		-7.59718e-06	-7.10411e-06	-6.72783e-06	-9.13333e-06	-8.09433e-06	-8.8552e-06	-7.31269e-06	-7.31068e-06		-9.9733e-06	-1.04996e-05	-1.06914e-05	-1.01416e-05
1659.92	1.87308e-06	3.46796e-06	-2.63099e-07	3.00162e-06	2.45396e-06	-6.45995e-06	2.89361e-06	-1.08882e-05		-4.45774e-06	-3.63346e-06	-3.50241e-06	-5.44166e-06	-4.8308e-06	-5.40949e-06	-4.02064e-06	-3.73036e-06		-6.35583e-06	-6.81811e-06	-6.988e-06	-6.59397e-06
1659.21	3.10664e-06	4.70496e-06	1.18642e-07	5.30834e-06	4.32374e-06	-3.47474e-06	3.0903e-06	-7.20166e-06		-1.71072e-06	-6.73879e-07	-8.15966e-07	-2.04737e-06	-1.93655e-06	-2.12934e-06	-1.15945e-06	-5.93992e-07		-3.14609e-06	-3.49724e-06	-3.58313e-06	-3.37355e-06
1658.49	3.82261e-06	5.50144e-06	7.47721e-07	6.61029e-06	5.25375e-06	-8.60397e-07	2.89545e-06	-3.56825e-06		7.09829e-07	1.86532e-06	1.47772e-06	1.04247e-06	5.96602e-07	9.23073e-07	1.32082e-06	2.1052e-06		-3.65464e-07	-5.85178e-07	-5.79284e-07	-5.17986e-07
1657.78	4.38671e-06	6.10267e-06	1.95383e-06	7.01203e-06	5.60239e-06	1.32116e-06	2.5458e-06	-5.45107e-07		2.80008e-06	4.02784e-06	3.45221e-06	3.77689e-06	2.73009e-06	3.63869e-06	3.42002e-06	4.35006e-06		1.93928e-06	1.85008e-06	1.89264e-06	1.8818e-06
1657.07	4.87196e-06	6.55493e-06	3.46906e-06	6.65728e-06	5.61343e-06	3.05827e-06	2.30935e-06	1.32803e-06		4.56388e-06	5.85599e-06	5.17151e-06	6.13542e-06	4.46001e-06	5.92251e-06	5.1667e-06	6.18583e-06		3.79271e-06	3.83228e-06	3.81475e-06	3.83287e-06
1656.36	5.23349e-06	6.88409e-06	4.78691e-06	5.76498e-06	5.33965e-06	4.39176e-06	2.32784e-06	1.68287e-06		6.01894e-06	7.3649e-06	6.66296e-06	8.11297e-06	5.80594e-06	7.70324e-06	6.61512e-06	7.67688e-06		5.27651e-06	5.45162e-06	5.27966e-06	5.44259e-06
1655.64	5.43606e-06	7.0304e-06	5.59991e-06	4.69219e-06	4.85928e-06	5.35707e-06	2.66189e-06	7.42548e-07		7.11553e-06	8.4488e-06	7.81736e-06	9.63767e-06	6.71874e-06	8.87896e-06	7.73678e-06	8.78375e-06		6.40528e-06	6.72082e-06	6.34272e-06	6.73041e-06
1654.93	5.3997e-06	6.8218e-06	5.97497e-06	3.73586e-06	4.32674e-06	5.94679e-06	3.33169e-06	-7.07114e-07		7.73963e-06	8.90685e-06	8.44037e-06	1.05652e-05	7.1051e-06	9.3439e-06	8.40093e-06	9.35881e-06		7.08286e-06	7.53191e-06	6.95117e-06	7.55516e-06
1654.22	5.0255e-06	6.20083e-06	6.17527e-06	2.96965e-06	3.83308e-06	6.20717e-06	4.26336e-06	-1.85458e-06		7.89052e-06	8.67338e-06	8.50016e-06	1.08451e-05	7.01951e-06	9.14819e-06	8.55705e-06	9.35105e-06		7.27531e-06	7.84319e-06	7.10298e-06	7.83619e-06
1653.5	4.28395e-06	5.27714e-06	6.23995e-06	2.41464e-06	3.38879e-06	6.33675e-06	5.26835e-06	-2.20243e-06		7.76088e-06	7.94931e-06	8.21559e-06	1.0633e-05	6.72216e-06	8.54047e-06	8.34944e-06	8.93582e-06		7.15723e-06	7.82611e-06	6.99402e-06	7.73405e-06
1652.79	3.2712e-06	4.20577e-06	5.94501e-06	2.15333e-06	2.9914e-06	6.5835e-06	6.09226e-06	-1.58765e-06		7.59813e-06	7.0656e-06	7.87744e-06	1.01614e-05	6.5032e-06	7.8304e-06	8.01261e-06	8.37759e-06		6.99641e-06	7.73999e-06	6.90688e-06	7.53536e-06
1652.08	2.28959e-06	3.17847e-06	5.25208e-06	2.3274e-06	2.77095e-06	7.09812e-06	6.58273e-06	-4.11528e-08		7.58605e-06	6.31857e-06	7.69609e-06	9.61046e-06	6.53945e-06	7.26758e-06	7.75601e-06	7.87982e-06		6.99436e-06	7.77551e-06	7.03714e-06	7.4599e-06
1651.36	1.75394e-06	2.41695e-06	4.51825e-06	3.0725e-06	3.02745e-06	7.90589e-06	6.73468e-06	2.26653e-06		7.84552e-06	5.92141e-06	7.7895e-06	9.11916e-06	6.90133e-06	6.99928e-06	7.73121e-06	7.56932e-06		7.26076e-06	8.03883e-06	7.45457e-06	7.59959e-06
1650.65	1.97053e-06	2.19377e-06	4.20166e-06	4.4089e-06	4.02393e-06	8.94043e-06	6.47984e-06	4.86518e-06		8.46318e-06	6.0208e-06	8.20255e-06	8.81778e-06	7.6046e-06	7.08527e-06	8.0308e-06	7.53479e-06		7.86309e-06	8.58754e-06	8.17347e-06	7.99386e-06
1649.94	3.17798e-06	2.95736e-06	4.61274e-06	6.31736e-06	5.87796e-06	1.01217e-05	5.66142e-06	6.96894e-06		9.54404e-06	6.76557e-06	8.95421e-06	8.86142e-06	8.67359e-06	7.59024e-06	8.74334e-06	7.90562e-06		8.89624e-06	9.48576e-06	9.25676e-06	8.75164e-06
1649.23	5.7975e-06	5.28489e-06	6.0445e-06	9.06357e-06	8.84986e-06	1.1402e-05	4.42816e-06	8.00368e-06		1.11814e-05	8.28309e-06	1.00109e-05	9.37894e-06	1.00974e-05	8.57608e-06	9.92709e-06	8.81887e-06		1.04278e-05	1.07629e-05	1.07685e-05	9.97633e-06
1648.51	1.03956e-05	9.61233e-06	9.04321e-06	1.31932e-05	1.34767e-05	1.26572e-05	3.3695e-06	8.03884e-06		1.32683e-05	1.04821e-05	1.11517e-05	1.02491e-05	1.16665e-05	9.90867e-06	1.14187e-05	1.01775e-05		1.22584e-05	1.22023e-05	1.25092e-05	1.1468e-05
1647.8	1.72888e-05	1.61256e-05	1.43503e-05	1.89032e-05	2.00283e-05	1.36728e-05	3.00791e-06	7.3625e-06		1.5567e-05	1.31129e-05	1.216e-05	1.1168e-05	1.31291e-05	1.13643e-05	1.29507e-05	1.17132e-05		1.39918e-05	1.342e-05	1.40662e-05	1.28209e-05
1647.09	2.6089e-05	2.44677e-05	2.19175e-05	2.57273e-05	2.80313e-05	1.44239e-05	3.47967e-06	5.9735e-06		1.80444e-05	1.61138e-05	1.32138e-05	1.21595e-05	1.45631e-05	1.29823e-05	1.45622e-05	1.3466e-05		1.55303e-05	1.43611e-05	1.53175e-05	1.39401e-05
1646.37	3.56771e-05	3.35815e-05	3.04542e-05	3.27182e-05	3.63185e-05	1.51501e-05	4.67885e-06	3.59962e-06		2.08532e-05	1.95867e-05	1.47673e-05	1.36399e-05	1.62865e-05	1.50289e-05	1.65703e-05	1.57928e-05		1.71506e-05	1.5385e-05	1.65511e-05	1.5138e-05
1645.66	4.45169e-05	4.20357e-05	3.81964e-05	3.86733e-05	4.33605e-05	1.6129e-05	6.38644e-06	-2.663e-08		2.40451e-05	2.35097e-05	1.7146e-05	1.59936e-05	1.85028e-05	1.76949e-05	1.92085e-05	1.89306e-05		1.91238e-05	1.68757e-05	1.81085e-05	1.67911e-05
1644.95	5.1037e-05	4.84221e-05	4.36135e-05	4.24468e-05	4.77769e-05	1.7561e-05	8.3379e-06	-4.82299e-06		2.74901e-05	2.76915e-05	2.04128e-05	1.93644e-05	2.12011e-05	2.09646e-05	2.24904e-05	2.28408e-05		2.1532e-05	1.9031e-05	2.01789e-05	1.91155e-05
1644.23	5.39436e-05	5.15722e-05	4.56099e-05	4.31637e-05	4.86502e-05	1.95049e-05	1.02229e-05	-1.03362e-05		3.09042e-05	3.18087e-05	2.43773e-05	2.3609e-05	2.41852e-05	2.46101e-05	2.62152e-05	2.72529e-05		2.42593e-05	2.18127e-05	2.27393e-05	2.20729e-05
1643.52	5.24437e-05	5.06846e-05	4.36131e-05	4.03121e-05	4.55839e-05	2.1741e-05	1.17277e-05	-1.59552e-05		3.37966e-05	3.53319e-05	2.85369e-05	2.81983e-05	2.70158e-05	2.81378e-05	2.99003e-05	3.16125e-05		2.69293e-05	2.48667e-05	2.54505e-05	2.52768e-05
1642.81	4.64159e-05	4.55057e-05	3.77203e-05	3.39214e-05	3.88081e-05	2.3789e-05	1.2708e-05	-2.09195e-05		3.55405e-05	3.75876e-05	3.21751e-05	3.23157e-05	2.90846e-05	3.08639e-05	3.2855e-05	3.51435e-05		2.89631e-05	2.75947e-05	2.77035e-05	2.8075e-05
1642.1	3.64245e-05	3.64758e-05	2.86274e-05	2.47185e-05	2.92176e-05	2.51016e-05	1.32104e-05	-2.43097e-05		3.55666e-05	3.79548e-05	3.45886e-05	3.51373e-05	2.98236e-05	3.21122e-05	3.43935e-05	3.70744e-05		2.97753e-05	2.93605e-05	2.88479e-05	2.97867e-05
1641.38	2.35207e-05	2.46061e-05	1.73198e-05	1.39462e-05	1.80661e-05	2.52373e-05	1.31881e-05	-2.54276e-05		3.35168e-05	3.60231e-05	3.52494e-05	3.60412e-05	2.88574e-05	3.13829e-05	3.40029e-05	3.68361e-05		2.89398e-05	2.9643e-05	2.83961e-05	2.9889e-05
1640.67	9.18324e-06	1.12807e-05	4.91108e-06	2.96893e-06	6.50745e-06	2.40256e-05	1.23776e-05	-2.42404e-05		2.9411e-05	3.17803e-05	3.39624e-05	3.47785e-05	2.61717e-05	2.85631e-05	3.15466e-05	3.42726e-05		2.63567e-05	2.8214e-05	2.62105e-05	2.81953e-05
1639.96	-4.78033e-06	-2.06399e-06	-7.52792e-06	-7.00022e-06	-4.49584e-06	2.16822e-05	1.05838e-05	-2.11522e-05		2.37257e-05	2.57062e-05	3.09156e-05	3.15704e-05	2.21754e-05	2.40395e-05	2.73727e-05	2.97532e-05		2.23411e-05	2.52917e-05	2.26077e-05	2.49423e-05
1639.24	-1.67475e-05	-1.43173e-05	-1.91026e-05	-1.49814e-05	-1.39586e-05	1.87003e-05	7.95056e-06	-1.62916e-05		1.72207e-05	1.85783e-05	2.65042e-05	2.69696e-05	1.74812e-05	1.84935e-05	2.21073e-05	2.39679e-05		1.74595e-05	2.14165e-05	1.81903e-05	2.0617e-05
1638.53	-2.57777e-05	-2.43611e-05	-2.85102e-05	-2.05781e-05	-2.1137e-05	1.55677e-05	4.75035e-06	-9.45989e-06		1.07527e-05	1.12417e-05	2.12847e-05	2.15909e-05	1.27409e-05	1.2746e-05	1.64496e-05	1.76228e-05		1.22723e-05	1.71419e-05	1.35679e-05	1.57929e-05
1637.82	-3.15843e-05	-3.10407e-05	-3.42395e-05	-2.38096e-05	-2.56968e-05	1.26681e-05	1.3604e-06	-4.03263e-07		5.12801e-06	4.50418e-06	1.5958e-05	1.60375e-05	8.61268e-06	7.63306e-06	1.11054e-05	1.13978e-05		7.29617e-06	1.29479e-05	9.28528e-06	1.10765e-05
1637.1	-3.41019e-05	-3.39855e-05	-3.57886e-05	-2.43683e-05	-2.72478e-05	1.03442e-05	-1.3611e-06	1.1255e-05		8.97254e-07	-9.93838e-07	1.11101e-05	1.09102e-05	5.61042e-06	3.73427e-06	6.63749e-06	5.96877e-06		3.03344e-06	9.28168e-06	5.8176e-06	6.97055e-06
1636.39	-3.32246e-05	-3.33591e-05	-3.3324e-05	-2.19951e-05	-2.56159e-05	8.79194e-06	-2.32235e-06	2.55313e-05		-1.70025e-06	-4.8546e-06	7.12922e-06	6.6487e-06	4.0365e-06	1.35786e-06	3.40046e-06	1.86539e-06		-1.58027e-07	6.44165e-06	3.46616e-06	3.8123e-06
1635.68	-2.92552e-05	-2.95989e-05	-2.73348e-05	-1.72106e-05	-2.13605e-05	7.93744e-06	-6.16004e-07	4.1673e-05		-2.77997e-06	-7.00662e-06	4.18207e-06	3.37243e-06	3.88419e-06	5.12664e-07	1.4675e-06	-7.24391e-07		-2.18975e-06	4.45142e-06	2.26055e-06	1.71978e-06
1634.97	-2.33379e-05	-2.37182e-05	-1.9081e-05	-1.12708e-05	-1.57389e-05	7.4155e-06	4.30299e-06	5.82829e-05		-2.92112e-06	-7.85177e-06	2.03502e-06	7.85138e-07	4.64809e-06	7.32965e-07	4.83539e-07	-2.12109e-06		-3.32197e-06	3.0001e-06	1.86184e-06	4.62266e-07
1634.25	-1.71319e-05	-1.72919e-05	-1.05265e-05	-5.66179e-06	-1.03069e-05	6.68334e-06	1.2393e-05	7.3553e-05		-3.04979e-06	-8.20375e-06	5.38039e-08	-1.72517e-06	5.40082e-06	1.13103e-06	-2.74228e-07	-3.05954e-06		-4.08287e-06	1.56044e-06	1.64674e-06	-4.8952e-07
1633.54	-1.21745e-05	-1.19915e-05	-3.61433e-06	-1.73481e-06	-6.54128e-06	5.22535e-06	2.28073e-05	8.55121e-05		-4.08681e-06	-8.974e-06	-2.4968e-06	-4.79799e-06	5.16983e-06	7.42994e-07	-1.5957e-06	-4.36209e-06		-5.03688e-06	-3.61813e-07	9.95899e-07	-1.69611e-06
1632.83	-9.72183e-06	-9.28028e-06	1.19791e-07	-5.94329e-07	-5.62644e-06	2.69363e-06	3.40006e-05	9.24939e-05		-6.69091e-06	-1.09114e-05	-6.17526e-06	-8.88156e-06	3.22837e-06	-1.1766e-06	-4.11901e-06	-6.70326e-06		-6.63547e-06	-3.09998e-06	-5.30914e-07	-3.57738e-06
1632.11	-1.07959e-05	-1.03165e-05	-4.44837e-07	-2.98756e-06	-8.33192e-06	-1.09988e-06	4.41737e-05	9.35724e-05		-1.12701e-05	-1.45621e-05	-1.13327e-05	-1.42535e-05	-8.86757e-07	-5.09609e-06	-8.3348e-06	-1.06125e-05		-9.25677e-06	-6.91063e-06	-3.28223e-06	-6.47538e-06
1631.4	-1.61033e-05	-1.57911e-05	-5.97179e-06	-9.34489e-06	-1.50627e-05	-6.29525e-06	5.15923e-05	8.83577e-05		-1.81467e-05	-2.03613e-05	-1.82589e-05	-2.11762e-05	-7.50261e-06	-1.13123e-05	-1.46882e-05	-1.65751e-05		-1.33029e-05	-1.21098e-05	-7.66071e-06	-1.07748e-05
1630.69	-2.59437e-05	-2.58184e-05	-1.66038e-05	-1.98003e-05	-2.58864e-05	-1.29582e-05	5.47419e-05	7.66145e-05		-2.74968e-05	-2.85394e-05	-2.71607e-05	-2.98105e-05	-1.67615e-05	-1.99344e-05	-2.3462e-05	-2.48939e-05		-1.907e-05	-1.89428e-05	-1.39742e-05	-1.67783e-05
1629.97	-3.99961e-05	-3.98671e-05	-3.17665e-05	-3.38468e-05	-4.02161e-05	-2.08196e-05	5.27106e-05	5.86647e-05		-3.88992e-05	-3.86934e-05	-3.77524e-05	-3.97683e-05	-2.82426e-05	-3.05632e-05	-3.43387e-05	-3.52461e-05		-2.63652e-05	-2.71806e-05	-2.20399e-05	-2.43343e-05
1629.26	-5.71094e-05	-5.66797e-05	-4.99063e-05	-5.02744e-05	-5.67443e-05	-2.93518e-05	4.52723e-05	3.574e-05		-5.1314e-05	-4.97924e-05	-4.91676e-05	-5.01627e-05	-4.09707e-05	-4.22782e-05	-4.63988e-05	-4.67519e-05		-3.45832e-05	-3.62e-05	-3.12799e-05	-3.2899e-05
1628.55	-7.55031e-05	-7.46253e-05	-6.90571e-05	-6.75697e-05	-7.38675e-05	-3.83458e-05	3.23826e-05	9.42376e-06		-6.39566e-05	-6.10703e-05	-6.07825e-05	-6.04997e-05	-5.42413e-05	-5.44144e-05	-5.89806e-05	-5.88491e-05		-4.34406e-05	-4.57396e-05	-4.14374e-05	-4.22646e-05
1627.83	-9.31481e-05	-9.20307e-05	-8.74877e-05	-8.41588e-05	-8.99615e-05	-4.80285e-05	1.40366e-05	-1.89022e-05		-7.66449e-05	-7.24038e-05	-7.26188e-05	-7.09524e-05	-6.79314e-05	-6.68848e-05	-7.20108e-05	-7.15398e-05		-5.31469e-05	-5.60668e-05	-5.2703e-05	-5.27282e-05
1627.12	-0.00010791	-0.000106938	-0.000103438	-9.84168e-05	-0.000103407	-5.85331e-05	-9.27736e-06	-4.79193e-05		-8.9151e-05	-8.36839e-05	-8.47135e-05	-8.16825e-05	-8.1845e-05	-7.9549e-05	-8.5351e-05	-8.47053e-05		-6.37903e-05	-6.73388e-05	-6.50958e-05	-6.44137e-05
1626.41	-0.00011778	-0.000117258	-0.000115065	-0.000108716	-0.000112636	-6.95393e-05	-3.62347e-05	-7.60148e-05		-0.000100797	-9.43614e-05	-9.66261e-05	-9.23759e-05	-9.52936e-05	-9.1792e-05	-9.8372e-05	-9.76929e-05		-7.49684e-05	-7.92155e-05	-7.81203e-05	-7.68654e-05
1625.7	-0.000121293	-0.000121411	-0.000120932	-0.000113777	-0.000116442	-8.03895e-05	-6.48564e-05	-0.000101334		-0.000110678	-0.000103605	-0.000107545	-0.000102358	-0.000107293	-0.000102689	-0.000110132	-0.000109512		-8.59504e-05	-9.09898e-05	-9.09333e-05	-8.92328e-05
1624.98	-0.000117868	-0.000118799	-0.000120364	-0.000113085	-0.000114341	-9.03059e-05	-9.28924e-05	-0.000122119		-0.000117943	-0.000110585	-0.000116523	-0.000110787	-0.000116842	-0.000111271	-0.000119633	-0.000119116		-9.59026e-05	-0.000101775	-0.000102563	-0.000100548
1624.27	-0.000108122	-0.000109999	-0.000113643	-0.000107067	-0.000106736	-9.85227e-05	-0.000118187	-0.000137024		-0.000121928	-0.000114652	-0.000122636	-0.000116793	-0.000123079	-0.00011673	-0.000125971	-0.000125575		-0.000104008	-0.000110638	-0.000112054	-0.000109894
1623.56	-9.38789e-05	-9.66029e-05	-0.000102119	-9.70005e-05	-9.49579e-05	-0.000104361	-0.000139029	-0.000145419		-0.000122215	-0.000115385	-0.000125112	-0.000119594	-0.000125383	-0.000118531	-0.00012844	-0.000128167		-0.000109513	-0.000116697	-0.000118538	-0.000116435
1622.84	-7.75941e-05	-8.06553e-05	-8.78414e-05	-8.45933e-05	-8.09743e-05	-0.000107255	-0.000154264	-0.000147532		-0.000118593	-0.000112554	-0.000123412	-0.000118577	-0.000123393	-0.000116383	-0.000126552	-0.000126386		-0.000111725	-0.000119166	-0.00012123	-0.000119373
1622.13	-6.15054e-05	-6.41321e-05	-7.2862e-05	-7.14066e-05	-6.66696e-05	-0.000106905	-0.000163142	-0.000144102		-0.0001112	-0.000106251	-0.000117476	-0.000113524	-0.000117197	-0.000110384	-0.000120258	-0.000120159		-0.000110235	-0.000117576	-0.000119662	-0.000118192
1621.42	-4.70763e-05	-4.8587e-05	-5.85401e-05	-5.85301e-05	-5.31965e-05	-0.000103529	-0.000165281	-0.000136004		-0.00010075	-9.71416e-05	-0.000108013	-0.000104966	-0.000107572	-0.000101269	-0.000110239	-0.000110169		-0.000105289	-0.00011216	-0.000114098	-0.000113111
1620.7	-3.48119e-05	-3.47606e-05	-4.51946e-05	-4.66097e-05	-4.10127e-05	-9.77949e-05	-0.000160894	-0.00012433		-8.83053e-05	-8.62215e-05	-9.61761e-05	-9.40086e-05	-9.56848e-05	-9.01514e-05	-9.76427e-05	-9.762e-05		-9.76709e-05	-0.000103744	-0.000105433	-0.000104951
1619.99	-2.443e-05	-2.27357e-05	-3.2669e-05	-3.57697e-05	-3.01503e-05	-9.0405e-05	-0.000150763	-0.000110433		-7.47766e-05	-7.42908e-05	-8.29638e-05	-8.16804e-05	-8.25342e-05	-7.79913e-05	-8.35053e-05	-8.3588e-05		-8.81563e-05	-9.31919e-05	-9.46142e-05	-9.45776e-05
1619.28	-1.52174e-05	-1.23522e-05	-2.09012e-05	-2.57337e-05	-2.03898e-05	-8.1903e-05	-0.000136024	-9.57631e-05		-6.0806e-05	-6.1861e-05	-6.90971e-05	-6.86773e-05	-6.88302e-05	-6.54642e-05	-6.86092e-05	-6.88436e-05		-7.73148e-05	-8.11986e-05	-8.23866e-05	-8.2682e-05
1618.57	-6.57222e-06	-3.36233e-06	-9.93676e-06	-1.62838e-05	-1.14162e-05	-7.26793e-05	-0.00011807	-8.1665e-05		-4.68316e-05	-4.92665e-05	-5.50731e-05	-5.54366e-05	-5.50668e-05	-5.30057e-05	-5.35402e-05	-5.39642e-05		-6.55787e-05	-6.83306e-05	-6.93193e-05	-6.97997e-05
1617.85	1.56246e-06	4.49428e-06	7.99191e-08	-7.44768e-06	-2.97438e-06	-6.28925e-05	-9.84326e-05	-6.9102e-05		-3.30533e-05	-3.6628e-05	-4.11e-05	-4.21197e-05	-4.14748e-05	-4.07812e-05	-3.86239e-05	-3.92738e-05		-5.31982e-05	-5.49417e-05	-5.5759e-05	-5.62495e-05
1617.14	8.86002e-06	1.141e-05	8.99695e-06	6.41368e-07	4.92504e-06	-5.24695e-05	-7.85629e-05	-5.85155e-05		-1.94712e-05	-2.38818e-05	-2.71532e-05	-2.86915e-05	-2.80491e-05	-2.87207e-05	-2.39462e-05	-2.48357e-05		-4.02578e-05	-4.11644e-05	-4.18402e-05	-4.21618e-05
1616.43	1.51984e-05	1.7481e-05	1.67661e-05	7.91116e-06	1.20489e-05	-4.12618e-05	-5.95155e-05	-4.97954e-05		-6.05569e-06	-1.09541e-05	-1.31981e-05	-1.51335e-05	-1.47226e-05	-1.6676e-05	-9.53133e-06	-1.06212e-05		-2.68228e-05	-2.70646e-05	-2.76278e-05	-2.76402e-05
1615.71	2.09051e-05	2.27268e-05	2.33637e-05	1.43833e-05	1.83169e-05	-2.92021e-05	-4.17806e-05	-4.2246e-05		7.12528e-06	2.10207e-06	6.75062e-07	-1.54771e-06	-1.50313e-06	-4.55733e-06	4.53041e-06	3.34162e-06		-1.30436e-05	-1.27626e-05	-1.32349e-05	-1.28754e-05
1615	2.63471e-05	2.71594e-05	2.86987e-05	2.01388e-05	2.39552e-05	-1.64136e-05	-2.54626e-05	-3.4746e-05		1.98445e-05	1.50299e-05	1.42109e-05	1.18238e-05	1.14463e-05	7.5632e-06	1.80098e-05	1.68737e-05		7.99044e-07	1.50837e-06	1.11222e-06	1.81921e-06
1614.29	3.14585e-05	3.08185e-05	3.27405e-05	2.53281e-05	2.92229e-05	-3.2471e-06	-1.05036e-05	-2.6177e-05		3.17192e-05	2.73694e-05	2.70023e-05	2.46032e-05	2.37866e-05	1.94095e-05	3.05203e-05	2.96171e-05		1.4283e-05	1.53658e-05	1.50355e-05	1.6009e-05
1613.57	3.58629e-05	3.37749e-05	3.5696e-05	3.01761e-05	3.41144e-05	9.80054e-06	3.29342e-06	-1.59257e-05		4.23064e-05	3.85892e-05	3.85996e-05	3.63408e-05	3.50983e-05	3.05714e-05	4.16288e-05	4.11267e-05		2.69114e-05	2.83224e-05	2.80449e-05	2.91948e-05
1612.86	3.92663e-05	3.60859e-05	3.78477e-05	3.47529e-05	3.82987e-05	2.21878e-05	1.62009e-05	-4.13572e-06		5.11813e-05	4.82e-05	4.86062e-05	4.65696e-05	4.49701e-05	4.05761e-05	5.09698e-05	5.09629e-05		3.81973e-05	3.98729e-05	3.96315e-05	4.08831e-05
1612.15	4.15538e-05	3.7718e-05	3.9281e-05	3.87151e-05	4.12467e-05	3.33803e-05	2.83042e-05	8.41665e-06		5.7954e-05	5.57644e-05	5.66702e-05	5.48216e-05	5.3e-05	4.89021e-05	5.82406e-05	5.87071e-05		4.77031e-05	4.95653e-05	4.93525e-05	5.06339e-05
1611.44	4.26444e-05	3.85268e-05	3.99112e-05	4.14554e-05	4.24883e-05	4.29e-05	3.93481e-05	2.07176e-05		6.23165e-05	6.09056e-05	6.24736e-05	6.06862e-05	5.88162e-05	5.50566e-05	6.3185e-05	6.39932e-05		5.50707e-05	5.70586e-05	5.6884e-05	5.81153e-05
1610.72	4.24669e-05	3.83664e-05	3.97245e-05	4.25446e-05	4.18943e-05	5.03768e-05	4.88472e-05	3.19533e-05		6.41043e-05	6.33505e-05	6.57645e-05	6.38907e-05	6.21464e-05	5.87036e-05	6.56256e-05	6.65759e-05		6.00443e-05	6.21474e-05	6.20159e-05	6.31205e-05
1610.01	4.11131e-05	3.7242e-05	3.88823e-05	4.20368e-05	3.98585e-05	5.56203e-05	5.6312e-05	4.1698e-05		6.33857e-05	6.30561e-05	6.64708e-05	6.4405e-05	6.29389e-05	5.97839e-05	6.557e-05	6.64503e-05		6.25503e-05	6.48101e-05	6.46935e-05	6.56091e-05
1609.3	3.88194e-05	3.54089e-05	3.76078e-05	4.04086e-05	3.71198e-05	5.8696e-05	6.14603e-05	4.97938e-05		6.05707e-05	6.03728e-05	6.48664e-05	6.2555e-05	6.14972e-05	5.86081e-05	6.33433e-05	6.39858e-05		6.28107e-05	6.5283e-05	6.5126e-05	6.58045e-05
1608.58	3.57417e-05	3.32661e-05	3.60525e-05	3.81942e-05	3.43207e-05	5.98665e-05	6.43206e-05	5.60701e-05		5.63222e-05	5.59713e-05	6.15174e-05	5.89313e-05	5.83952e-05	5.57537e-05	5.95241e-05	5.98293e-05		6.12822e-05	6.39831e-05	6.37398e-05	6.41534e-05
1607.87	3.20054e-05	3.11863e-05	3.43522e-05	3.57932e-05	3.18333e-05	5.94379e-05	6.519e-05	6.02859e-05		5.13156e-05	5.05786e-05	5.70128e-05	5.41589e-05	5.42292e-05	5.1819e-05	5.4728e-05	5.46532e-05		5.84547e-05	6.133e-05	6.09861e-05	6.11285e-05
1607.16	2.80564e-05	2.95086e-05	3.28354e-05	3.34551e-05	2.98945e-05	5.76916e-05	6.44089e-05	6.22702e-05		4.61418e-05	4.48635e-05	5.18568e-05	4.88051e-05	4.95392e-05	4.73235e-05	4.95231e-05	4.90574e-05		5.47603e-05	5.76983e-05	5.72672e-05	5.7146e-05
1606.44	2.46961e-05	2.85094e-05	3.19503e-05	3.1333e-05	2.86857e-05	5.49009e-05	6.21526e-05	6.20587e-05		4.1308e-05	3.9438e-05	4.65252e-05	4.33906e-05	4.48372e-05	4.27309e-05	4.44325e-05	4.35739e-05		5.0585e-05	5.34537e-05	5.29675e-05	5.2593e-05
1605.73	2.26613e-05	2.82604e-05	3.19066e-05	2.95836e-05	2.83505e-05	5.1351e-05	5.85224e-05	5.99892e-05		3.72001e-05	3.48089e-05	4.14821e-05	3.83708e-05	4.05557e-05	3.84486e-05	3.98789e-05	3.86339e-05		4.62846e-05	4.89535e-05	4.84461e-05	4.78368e-05
1605.02	2.22965e-05	2.86232e-05	3.24993e-05	2.8409e-05	2.89519e-05	4.72939e-05	5.37977e-05	5.66509e-05		3.39546e-05	3.12246e-05	3.7037e-05	3.40113e-05	3.68998e-05	3.47338e-05	3.6049e-05	3.44584e-05		4.21122e-05	4.44458e-05	4.39405e-05	4.31452e-05
1604.31	2.34885e-05	2.93992e-05	3.31792e-05	2.78552e-05	3.01906e-05	4.28322e-05	4.83451e-05	5.24755e-05		3.13079e-05	2.84997e-05	3.3112e-05	3.02142e-05	3.37043e-05	3.15347e-05	3.27509e-05	3.09125e-05		3.80602e-05	3.99057e-05	3.94464e-05	3.85528e-05
1603.59	2.58273e-05	3.04263e-05	3.33771e-05	2.77503e-05	3.14287e-05	3.80308e-05	4.247e-05	4.75988e-05		2.88339e-05	2.62286e-05	2.93909e-05	2.67179e-05	3.06501e-05	2.86469e-05	2.96436e-05	2.77107e-05		3.39852e-05	3.51858e-05	3.48851e-05	3.39915e-05
1602.88	2.88307e-05	3.15415e-05	3.29177e-05	2.80292e-05	3.22805e-05	3.33038e-05	3.67407e-05	4.24268e-05		2.65805e-05	2.44265e-05	2.59666e-05	2.37162e-05	2.78466e-05	2.62397e-05	2.68363e-05	2.50113e-05		3.01037e-05	3.05512e-05	3.05542e-05	2.97332e-05
1602.17	3.19856e-05	3.26054e-05	3.21933e-05	2.86852e-05	3.27459e-05	2.93343e-05	3.20319e-05	3.78202e-05		2.50595e-05	2.35523e-05	2.3447e-05	2.18207e-05	2.58352e-05	2.48464e-05	2.48791e-05	2.33694e-05		2.69707e-05	2.66674e-05	2.70447e-05	2.63541e-05
1601.45	3.45141e-05	3.33131e-05	3.14753e-05	2.93746e-05	3.26372e-05	2.64374e-05	2.88808e-05	3.44031e-05		2.4377e-05	2.36524e-05	2.21055e-05	2.11917e-05	2.47806e-05	2.45534e-05	2.3925e-05	2.28805e-05		2.47827e-05	2.38627e-05	2.45642e-05	2.40589e-05
1600.74	3.54808e-05	3.31228e-05	3.04057e-05	2.95072e-05	3.15101e-05	2.44088e-05	2.7192e-05	3.21757e-05		2.40459e-05	2.41506e-05	2.15702e-05	2.13611e-05	2.42695e-05	2.48057e-05	2.35375e-05	2.30194e-05		2.32453e-05	2.19437e-05	2.28475e-05	2.25454e-05
1600.03	3.43204e-05	3.16283e-05	2.85091e-05	2.8644e-05	2.91023e-05	2.29265e-05	2.65267e-05	3.07429e-05		2.36034e-05	2.44656e-05	2.13719e-05	2.17885e-05	2.38613e-05	2.50252e-05	2.32599e-05	2.32206e-05		2.20414e-05	2.06196e-05	2.15997e-05	2.14732e-05
1599.31	3.11518e-05	2.87389e-05	2.56762e-05	2.68052e-05	2.56394e-05	2.17935e-05	2.64678e-05	2.96592e-05		2.28772e-05	2.43228e-05	2.12304e-05	2.21224e-05	2.33306e-05	2.49073e-05	2.28491e-05	2.31571e-05		2.10305e-05	1.96894e-05	2.06486e-05	2.06473e-05
1598.6	2.66129e-05	2.47025e-05	2.22551e-05	2.43936e-05	2.16166e-05	2.08931e-05	2.67409e-05	2.86097e-05		2.18245e-05	2.36274e-05	2.09488e-05	2.21236e-05	2.25549e-05	2.43089e-05	2.21529e-05	2.26608e-05		2.01271e-05	1.89775e-05	1.98503e-05	1.99235e-05
1597.89	2.15132e-05	2.01277e-05	1.88732e-05	2.18813e-05	1.75286e-05	2.01314e-05	2.71549e-05	2.74693e-05		2.04388e-05	2.23658e-05	2.03752e-05	2.16531e-05	2.14798e-05	2.31886e-05	2.10915e-05	2.16819e-05		1.92316e-05	1.83414e-05	1.90799e-05	1.91925e-05
1597.17	1.65617e-05	1.57698e-05	1.60655e-05	1.95583e-05	1.3843e-05	1.94196e-05	2.74901e-05	2.62909e-05		1.87615e-05	2.06117e-05	1.94507e-05	2.06935e-05	2.01253e-05	2.16041e-05	1.96963e-05	2.02765e-05		1.82535e-05	1.7689e-05	1.82482e-05	1.83847e-05
1596.46	1.22696e-05	1.21687e-05	1.40068e-05	1.75014e-05	1.09512e-05	1.86682e-05	2.74684e-05	2.51783e-05		1.68877e-05	1.85302e-05	1.82061e-05	1.93165e-05	1.85528e-05	1.96822e-05	1.80803e-05	1.85658e-05		1.71535e-05	1.69498e-05	1.72996e-05	1.74459e-05
1595.75	9.01891e-06	9.52631e-06	1.26896e-05	1.5734e-05	9.07845e-06	1.78221e-05	2.69135e-05	2.41624e-05		1.49814e-05	1.63614e-05	1.67453e-05	1.76784e-05	1.68722e-05	1.76078e-05	1.63959e-05	1.67257e-05		1.59742e-05	1.60794e-05	1.62402e-05	1.63563e-05
1595.04	7.08087e-06	7.84466e-06	1.20961e-05	1.42821e-05	8.28184e-06	1.68654e-05	2.58337e-05	2.31612e-05		1.32319e-05	1.43292e-05	1.52095e-05	1.59858e-05	1.52293e-05	1.55844e-05	1.47763e-05	1.49446e-05		1.47866e-05	1.50562e-05	1.51127e-05	1.51341e-05
1594.32	6.45124e-06	7.02409e-06	1.20548e-05	1.30489e-05	8.49043e-06	1.57976e-05	2.43008e-05	2.1987e-05		1.17719e-05	1.25578e-05	1.37361e-05	1.441e-05	1.37471e-05	1.3773e-05	1.32985e-05	1.33588e-05		1.36276e-05	1.38913e-05	1.39501e-05	1.38314e-05
1593.61	6.83727e-06	6.9015e-06	1.22443e-05	1.18582e-05	9.50052e-06	1.46447e-05	2.23754e-05	2.04546e-05		1.06569e-05	1.11026e-05	1.24348e-05	1.30376e-05	1.24918e-05	1.22791e-05	1.20149e-05	1.20448e-05		1.25259e-05	1.26739e-05	1.2789e-05	1.25523e-05
1592.9	7.88908e-06	7.32188e-06	1.24904e-05	1.07206e-05	1.09954e-05	1.34654e-05	2.01824e-05	1.85e-05		9.8795e-06	9.99686e-06	1.13477e-05	1.18628e-05	1.14602e-05	1.11404e-05	1.09607e-05	1.10216e-05		1.15105e-05	1.1532e-05	1.16743e-05	1.14064e-05
1592.18	9.48284e-06	8.18244e-06	1.27926e-05	9.90762e-06	1.26595e-05	1.2325e-05	1.7949e-05	1.62417e-05		9.37744e-06	9.23565e-06	1.04326e-05	1.0822e-05	1.05835e-05	1.03038e-05	1.01141e-05	1.02458e-05		1.0584e-05	1.05306e-05	1.06291e-05	1.04229e-05
1591.47	1.15704e-05	9.33503e-06	1.29477e-05	9.66e-06	1.422e-05	1.12763e-05	1.58766e-05	1.39417e-05		9.06329e-06	8.76154e-06	9.6368e-06	9.87276e-06	9.79578e-06	9.66509e-06	9.41922e-06	9.65039e-06		9.74688e-06	9.6698e-06	9.66735e-06	9.56587e-06
1590.76	1.37496e-05	1.0617e-05	1.25702e-05	9.83936e-06	1.52612e-05	1.03379e-05	1.39637e-05	1.17643e-05		8.8529e-06	8.47626e-06	8.94562e-06	9.02493e-06	9.08884e-06	9.14437e-06	8.8446e-06	9.17585e-06		9.02568e-06	8.95309e-06	8.8281e-06	8.83077e-06
1590.04	1.52169e-05	1.18887e-05	1.1589e-05	1.00024e-05	1.52256e-05	9.49768e-06	1.20813e-05	9.66051e-06		8.67604e-06	8.26825e-06	8.3319e-06	8.31345e-06	8.48102e-06	8.71083e-06	8.38499e-06	8.76942e-06		8.43716e-06	8.38889e-06	8.16929e-06	8.26433e-06
1589.33	1.53539e-05	1.28393e-05	1.03188e-05	9.82172e-06	1.39003e-05	8.75e-06	1.02951e-05	7.65837e-06		8.47846e-06	8.05475e-06	7.72524e-06	7.77648e-06	7.95263e-06	8.3413e-06	8.00808e-06	8.38793e-06		7.93535e-06	7.92317e-06	7.68343e-06	7.85051e-06
1588.62	1.42553e-05	1.30243e-05	9.08859e-06	9.17514e-06	1.15885e-05	8.07929e-06	8.85868e-06	5.90653e-06		8.22447e-06	7.80893e-06	7.1142e-06	7.40626e-06	7.46114e-06	8.0034e-06	7.65439e-06	7.98697e-06		7.41983e-06	7.42711e-06	7.23661e-06	7.4583e-06
1587.91	1.24164e-05	1.21049e-05	7.71787e-06	8.06197e-06	8.78403e-06	7.46967e-06	7.92359e-06	4.48202e-06		7.87927e-06	7.53519e-06	6.58877e-06	7.14111e-06	6.98729e-06	7.6472e-06	7.2789e-06	7.53414e-06		6.86135e-06	6.8515e-06	6.70671e-06	6.97711e-06
1587.19	1.01277e-05	1.00383e-05	5.66765e-06	6.63253e-06	5.93859e-06	6.93793e-06	7.4038e-06	3.41074e-06		7.40736e-06	7.23451e-06	6.23412e-06	6.91693e-06	6.53553e-06	7.22502e-06	6.86409e-06	7.0341e-06		6.33929e-06	6.29294e-06	6.11804e-06	6.42501e-06
1586.48	7.45239e-06	7.24647e-06	2.8667e-06	5.13572e-06	3.38654e-06	6.49101e-06	7.03808e-06	2.69861e-06		6.7938e-06	6.88775e-06	6.04513e-06	6.6739e-06	6.10065e-06	6.72737e-06	6.40913e-06	6.49854e-06		5.91131e-06	5.84275e-06	5.56245e-06	5.88642e-06
1585.77	4.6341e-06	4.47943e-06	-7.67322e-08	3.8828e-06	1.43638e-06	6.11037e-06	6.63975e-06	2.41929e-06		6.07633e-06	6.47821e-06	5.95466e-06	6.37663e-06	5.66133e-06	6.17161e-06	5.93348e-06	5.94451e-06		5.55285e-06	5.4901e-06	5.08796e-06	5.41208e-06
1585.05	2.18815e-06	2.47137e-06	-2.42156e-06	3.10641e-06	3.33632e-07	5.78931e-06	6.23798e-06	2.62157e-06		5.35849e-06	6.02604e-06	5.90375e-06	6.03748e-06	5.22039e-06	5.58928e-06	5.49087e-06	5.42039e-06		5.23251e-06	5.19609e-06	4.70817e-06	5.02064e-06
1584.34	6.32543e-07	1.60913e-06	-3.7556e-06	2.85207e-06	1.60595e-07	5.53778e-06	5.94462e-06	3.11637e-06		4.75721e-06	5.57695e-06	5.85055e-06	5.6986e-06	4.82275e-06	5.03262e-06	5.14251e-06	4.98577e-06		4.95749e-06	4.95746e-06	4.43907e-06	4.72176e-06
1583.63	2.55419e-07	1.73368e-06	-3.99508e-06	3.0659e-06	8.5721e-07	5.35237e-06	5.77387e-06	3.55984e-06		4.33867e-06	5.16811e-06	5.7422e-06	5.41678e-06	4.51728e-06	4.57096e-06	4.90931e-06	4.6761e-06		4.74152e-06	4.7874e-06	4.30037e-06	4.50508e-06
1582.91	9.77456e-07	2.26752e-06	-3.22245e-06	3.66227e-06	2.25954e-06	5.20614e-06	5.60399e-06	3.76288e-06		4.10626e-06	4.8228e-06	5.53304e-06	5.25596e-06	4.31969e-06	4.26679e-06	4.76225e-06	4.50147e-06		4.57425e-06	4.6817e-06	4.29148e-06	4.33483e-06
1582.2	2.29472e-06	2.73453e-06	-1.55572e-06	4.453e-06	4.02316e-06	5.04617e-06	5.27754e-06	3.87391e-06		4.01247e-06	4.54782e-06	5.23108e-06	5.21479e-06	4.21165e-06	4.1451e-06	4.64356e-06	4.42973e-06		4.40813e-06	4.58995e-06	4.34489e-06	4.16427e-06
1581.49	3.53043e-06	3.14597e-06	8.7684e-07	5.20534e-06	5.72838e-06	4.82708e-06	4.78981e-06	4.22757e-06		3.9812e-06	4.33056e-06	4.89997e-06	5.1917e-06	4.1626e-06	4.18143e-06	4.49861e-06	4.38138e-06		4.19713e-06	4.43778e-06	4.34988e-06	3.96552e-06
1580.78	4.3234e-06	3.79371e-06	3.82539e-06	5.80012e-06	7.09379e-06	4.5674e-06	4.39124e-06	5.02723e-06		3.95733e-06	4.16119e-06	4.60932e-06	5.09358e-06	4.15261e-06	4.32301e-06	4.31075e-06	4.29537e-06		3.95039e-06	4.1978e-06	4.25998e-06	3.75033e-06
1580.06	4.77408e-06	4.83878e-06	6.9057e-06	6.16554e-06	7.9816e-06	4.32819e-06	4.33243e-06	6.08456e-06		3.93092e-06	4.03753e-06	4.38768e-06	4.9085e-06	4.16987e-06	4.50736e-06	4.10637e-06	4.16775e-06		3.70141e-06	3.89827e-06	4.11947e-06	3.55969e-06
1579.35	5.09627e-06	6.10474e-06	9.61428e-06	6.25184e-06	8.33382e-06	4.14692e-06	4.55089e-06	6.91172e-06		3.90958e-06	3.94436e-06	4.21732e-06	4.67356e-06	4.18943e-06	4.65724e-06	3.91737e-06	4.02266e-06		3.46826e-06	3.59554e-06	3.9923e-06	3.43555e-06
1578.64	5.23231e-06	7.22821e-06	1.14127e-05	6.10536e-06	8.19767e-06	4.02037e-06	4.72571e-06	7.12446e-06		3.90212e-06	3.86817e-06	4.07122e-06	4.43901e-06	4.17774e-06	4.71639e-06	3.76011e-06	3.89222e-06		3.28793e-06	3.38e-06	3.92161e-06	3.41757e-06
1577.92	4.91527e-06	7.94978e-06	1.19711e-05	5.80763e-06	7.68864e-06	3.9212e-06	4.63681e-06	6.74301e-06		3.91265e-06	3.81176e-06	3.93009e-06	4.24367e-06	4.11557e-06	4.69073e-06	3.63821e-06	3.80707e-06		3.21839e-06	3.34051e-06	3.92143e-06	3.52719e-06
1577.21	4.02725e-06	8.23413e-06	1.13878e-05	5.42341e-06	6.90602e-06	3.81741e-06	4.35472e-06	6.11881e-06		3.94123e-06	3.79041e-06	3.78058e-06	4.09449e-06	4.01842e-06	4.62868e-06	3.55987e-06	3.77614e-06		3.27251e-06	3.47339e-06	3.96815e-06	3.73209e-06
1576.5	2.84403e-06	8.12238e-06	1.01412e-05	5.05628e-06	5.99866e-06	3.70334e-06	4.05311e-06	5.60893e-06		3.99555e-06	3.822e-06	3.6275e-06	3.97601e-06	3.93182e-06	4.56322e-06	3.54378e-06	3.77517e-06		3.39869e-06	3.66767e-06	4.01718e-06	3.94752e-06
1575.78	1.80661e-06	7.52871e-06	8.62198e-06	4.79823e-06	5.18256e-06	3.60472e-06	3.72876e-06	5.25217e-06		4.07085e-06	3.90063e-06	3.49198e-06	3.85974e-06	3.87002e-06	4.47469e-06	3.57609e-06	3.75305e-06		3.51966e-06	3.79573e-06	4.02641e-06	4.07249e-06
1575.07	1.12414e-06	6.3779e-06	6.85488e-06	4.57487e-06	4.52677e-06	3.53993e-06	3.1838e-06	4.72395e-06		4.10563e-06	3.95983e-06	3.37363e-06	3.69616e-06	3.77729e-06	4.29978e-06	3.58046e-06	3.64921e-06		3.57079e-06	3.79733e-06	3.97127e-06	4.04627e-06
