# Supplementary material for: Rapid restructurization of conformationally-distinct alpha-synuclein amyloid fibrils at an elevated temperature
Source: PeerJ. 2022 Sep 30;10:e14137. doi: 10.7717/peerj.14137 (PMC9528901; doi:10.7717/peerj.14137)
Supplement: Supplemental Information 5 [file peerj-10-14137-s005.xlsx]

## Sheet: Kinetic data
Time	Sample X1	Sample X2	Sample X3	Sample X4	Sample X5	Sample X6	Sample X7	Sample X8		Time	Sample X1	Sample X2	Sample X3	Sample X4	Sample X5	Sample X6	Sample X7	Sample X8
0	863	1102	1008	857	882	859	1136	755		0	844	856	1009	769	861	788	728	725
5	951	898	906	894	824	787	665	673		5	538	637	549	611	585	684	807	654
10	819	891	957	821	785	725	731	821		10	495	431	465	472	522	480	458	452
15	752	722	661	789	801	656	742	600		15	536	434	420	535	509	490	445	487
20	798	685	733	645	747	653	788	681		20	545	455	591	434	453	449	392	575
25	721	693	687	791	851	743	831	800		25	510	514	528	481	447	512	446	376
30	749	801	761	827	693	751	720	603		30	513	432	455	577	413	408	462	411
35	818	858	682	686	682	744	754	752		35	447	436	484	416	455	439	355	414
40	702	698	724	721	802	645	747	707		40	495	506	435	430	417	464	400	456
45	776	679	768	764	789	642	721	807		45	514	467	440	541	487	421	370	446
50	799	702	720	751	796	778	714	573		50	490	522	376	420	452	948	482	467
55	794	746	756	774	824	704	779	757		55	470	480	550	469	394	470	403	446
60	752	723	850	782	684	751	719	621		60	571	397	431	357	412	481	484	550
65	619	769	891	807	752	863	720	603		65	615	552	510	553	466	438	448	433
70	801	698	749	753	677	684	797	577		70	589	416	459	427	421	433	414	440
75	685	703	805	756	770	688	768	730		75	459	435	469	474	436	515	436	481
80	851	747	705	795	825	821	714	674		80	512	444	450	473	471	548	555	437
85	810	709	724	795	756	681	958	646		85	458	394	563	462	521	416	579	503
90	706	683	830	778	757	758	865	789		90	521	563	498	475	440	511	458	433
95	771	996	711	716	701	731	709	743		95	694	423	458	516	513	421	516	435
100	751	735	746	743	789	741	721	694		100	580	488	513	428	450	454	605	473
105	841	683	911	723	793	742	802	726		105	688	530	440	466	404	490	483	453
110	646	738	771	659	777	927	856	799		110	748	457	616	584	445	576	491	481
115	814	801	767	815	783	836	784	737		115	1130	439	485	521	423	461	450	436
120	883	728	726	751	922	636	898	718		120	1881	432	447	393	566	505	443	411
125	817	766	811	760	759	770	825	670		125	1755	402	470	448	449	498	475	415
130	815	791	808	798	762	701	782	820		130	1926	456	645	404	443	470	467	402
135	928	669	748	734	768	695	757	624		135	2460	399	688	487	412	448	377	380
140	702	731	739	771	862	811	807	798		140	3188	487	696	500	440	424	535	463
145	872	697	697	740	750	713	924	785		145	3316	419	862	461	432	496	456	396
150	740	836	813	700	721	653	826	863		150	3014	428	1157	486	446	430	338	368
155	786	637	769	777	840	762	886	754		155	5366	430	1371	529	475	394	405	436
160	769	717	762	814	779	759	845	819		160	4117	360	1603	784	463	430	506	521
165	894	965	792	784	665	770	781	594		165	5776	440	1903	600	465	513	499	421
170	706	715	861	845	906	748	769	820		170	4193	534	2559	662	439	385	386	459
175	867	741	727	711	745	772	678	708		175	5968	326	2828	654	419	417	471	435
180	758	716	763	788	899	801	724	818		180	6878	362	3476	939	516	388	396	437
185	710	704	752	892	775	743	934	655		185	6368	473	3242	1195	428	514	408	455
190	763	804	858	797	825	849	781	636		190	7054	487	3448	1544	395	372	433	465
195	846	726	648	797	768	751	657	671		195	9328	391	4360	1335	428	450	352	461
200	838	707	885	756	765	755	817	796		200	8027	483	5511	1504	470	448	478	482
205	846	789	801	724	790	813	863	789		205	6168	356	5661	2348	374	342	434	447
210	984	748	821	674	777	881	852	861		210	11012	370	5340	2513	419	362	349	376
215	852	846	844	737	775	758	768	731		215	9281	361	7296	3720	386	474	432	415
220	899	816	847	900	762	787	935	650		220	11325	527	6803	4486	387	454	564	340
225	853	720	707	771	738	838	884	835		225	6680	452	7301	4353	406	719	553	467
230	747	740	800	749	749	698	698	710		230	11290	431	7076	5673	462	491	594	377
235	729	760	838	785	809	759	804	772		235	11053	418	7649	5269	465	565	726	376
240	922	721	836	790	783	715	777	968		240	12370	380	10332	4732	466	824	620	665
245	977	772	782	848	745	831	732	643		245	11522	622	13437	6979	534	1084	841	417
250	745	920	699	709	719	633	786	767		250	15839	745	13502	6479	466	792	1081	428
255	819	722	685	785	875	690	704	651		255	10621	587	11741	7501	558	1065	1188	604
260	852	929	805	737	844	744	815	791		260	14079	722	14859	14622	581	1153	1168	544
265	1062	736	848	822	776	754	818	703		265	16597	684	11829	12125	604	1429	1558	625
270	862	808	747	727	751	756	671	727		270	21275	785	15163	11668	796	2289	1923	820
275	1079	707	740	831	733	786	836	672		275	15607	717	19072	15574	859	2289	1510	1011
280	817	726	706	798	776	900	737	813		280	28582	913	15969	13465	1121	2917	2124	891
285	928	801	779	723	693	864	722	861		285	22069	1188	15627	20629	1436	2685	2463	1104
290	777	731	887	817	788	771	809	598		290	25412	1374	17877	9274	1868	3450	2330	1383
295	728	878	833	794	743	728	730	725		295	19819	1411	18173	22346	2078	3229	2907	1594
300	809	814	760	798	779	666	735	683		300	30388	1493	15766	44917	3215	3388	2886	1771
305	1110	890	953	746	900	670	733	686		305	27755	2050	26775	30182	3930	4944	3762	2355
310	785	901	844	865	865	620	804	629		310	22208	2308	26191	38605	4944	5065	3166	2276
315	817	713	723	769	831	745	755	715		315	23068	2244	20407	33893	5866	4385	4553	2119
320	818	779	794	754	778	707	670	757		320	22618	2534	18961	20712	15347	5573	4793	3374
325	796	778	830	778	875	915	724	688		325	24963	2014	33606	28716	8693	6699	5013	3419
330	807	764	789	779	852	843	670	894		330	31244	3345	29302	30590	10219	6316	5047	3086
335	779	851	773	713	917	709	783	716		335	31173	2945	24317	39435	16022	6706	4664	3846
340	900	821	750	738	861	855	899	913		340	32138	3604	30664	35845	31369	8277	5681	4390
345	868	722	808	838	814	697	738	726		345	44251	4084	31537	28754	27038	7528	5605	4547
350	885	908	881	845	734	860	749	673		350	26679	3216	22314	31215	32836	8086	7870	4990
355	916	711	909	792	915	725	765	661		355	41417	4364	32913	39016	33757	8445	7907	5643
360	1079	826	872	864	769	764	766	765		360	26053	5223	40478	41400	31860	8527	7030	5905
365	1404	697	784	719	773	807	719	668		365	38127	6941	34201	41405	27981	9016	8395	6370
370	1395	759	888	820	1033	704	730	690		370	28854	5682	30520	49759	48945	9875	9359	6655
375	1849	705	848	820	840	811	654	830		375	35281	6756	29795	41773	74895	9249	11080	6778
380	1852	894	823	881	847	820	736	697		380	41224	10218	26011	41786	62225	8299	9654	7279
385	1765	778	818	802	785	808	924	710		385	32239	10202	39967	43331	89262	11477	11658	9548
390	2226	606	881	841	819	867	731	758		390	28637	9637	24762	44495	25989	11755	10900	8743
395	1934	786	771	903	815	851	841	694		395	26542	10331	33178	35934	100813	10924	7091	8824
400	2656	696	904	810	854	750	869	673		400	26084	7377	39674	40853	82921	11669	12323	9842
405	3055	753	703	752	818	669	770	705		405	37711	26634	36191	42189	55341	13453	12590	11567
410	2976	683	841	807	835	737	722	718		410	31965	15508	33668	36829	52415	13249	14125	11910
415	4375	894	763	727	749	815	862	741		415	45967	21415	30078	31719	49020	14451	13433	13272
420	4139	750	824	742	781	743	733	649		420	35381	12154	28806	38518	67107	17539	16832	15338
425	4419	859	727	760	844	782	776	720		425	38023	21178	29851	35821	53929	14270	14632	18392
430	4274	789	974	780	950	797	775	768		430	50613	21687	37348	32926	92604	15619	18022	14770
435	5228	802	737	772	812	837	714	858		435	49803	23457	25474	34197	39210	18809	17790	20840
440	5453	760	958	832	793	798	750	700		440	43644	39647	38070	32173	43628	22587	19745	15250
445	5015	845	907	767	863	836	784	712		445	47369	18841	31890	40746	50535	18014	28838	24282
450	5706	785	871	803	846	712	813	768		450	47900	17540	30795	27294	67067	19676	21736	20571
455	6402	834	971	788	795	653	783	689		455	50236	33951	31156	35121	40502	19111	23105	13660
460	7777	896	917	835	797	688	870	676		460	35061	24959	25990	26725	57485	19787	28166	21798
465	7880	910	1118	707	770	791	727	799		465	30384	41064	28660	30563	120767	23037	29665	19942
470	9315	742	1156	803	786	718	711	711		470	46194	49875	29339	36406	78620	24318	21635	13620
475	7304	906	1150	810	767	754	612	707		475	23536	51772	25678	41783	96602	10580	36495	30312
480	8277	719	1800	745	833	737	801	792		480	24390	40027	23147	33452	55179	27746	15694	33557
485	8895	825	1637	787	763	744	720	721		485	29144	58980	25377	27303	56943	19212	25627	41926
490	8513	809	2219	840	810	758	723	598		490	21570	40731	21251	26146	96645	22795	30024	40617
495	10276	764	2227	741	999	865	763	731		495	22282	33782	20914	32105	85735	20047	21885	20537
500	9882	741	2444	822	751	898	737	727		500	34829	29668	22033	30515	90309	25280	29647	46971
505	9680	779	2992	881	981	782	783	700		505	24685	37947	20723	28867	130008	31553	32282	35047
510	9716	740	3219	985	785	799	819	697		510	21078	37630	20404	31456	90481	48401	24446	4398
515	10154	813	3380	813	835	813	910	784		515	24261	29631	14522	26892	93524	22626	20884	33869
520	8680	656	4151	814	779	749	896	727		520	24896	39903	15553	31281	97190	30326	25052	20470
525	10622	846	4754	847	833	908	896	769		525	19432	43220	16192	30385	118452	40347	25680	39943
530	11713	707	5361	809	822	790	715	739		530	21890	35375	17531	29547	104432	34437	23764	40118
535	12404	909	6152	760	910	687	844	872		535	22793	49393	15109	25912	106622	26266	24763	32964
540	12775	745	6451	818	809	823	697	893		540	29782	43658	13451	26168	98149	47050	27270	43619
545	11112	757	5707	799	895	799	853	722		545	21675	33131	13402	28777	119340	35951	24227	45450
550	12096	791	7376	869	799	885	840	640		550	26246	35012	11624	31544	110311	31274	23615	38390
555	14115	773	8219	806	861	824	900	872		555	23221	39217	13516	24585	109038	24770	22436	37610
560	11834	808	11184	762	844	780	804	687		560	22732	34121	11299	26026	95704	14889	23095	43915
565	15494	771	11579	1133	767	795	667	739		565	19031	39002	10955	23466	121609	16043	23439	36717
570	15709	808	12045	761	749	733	722	775		570	20924	34799	9943	28765	113472	21708	22358	48424
575	15444	877	12536	783	921	726	931	961		575	22259	30079	11504	24419	123873	18178	20648	26911
580	12645	886	10743	726	829	870	822	696		580	24205	33070	9173	23762	109752	19907	22368	38316
585	12920	885	17401	752	824	828	807	727		585	17424	40848	9370	25885	116438	21756	18009	29142
590	17026	764	17337	797	869	680	756	737		590	16443	41460	9222	22853	95504	25148	25826	47827
595	16308	798	16550	866	767	921	982	932		595	16632	32210	9508	26165	119472	22761	17429	36342
600	14409	822	16013	883	819	789	832	828		600	18105	26584	8006	24288	101902	19688	20132	39746
605	17172	741	20575	814	839	831	685	820		605	17158	28962	6316	19629	91951	18048	22474	33751
610	17061	738	20340	784	811	722	776	610		610	19436	28919	7002	20314	135310	19666	17192	37253
615	16083	751	20610	995	853	837	805	670		615	14568	26538	6290	20435	134422	19881	22737	38843
620	17941	960	29701	868	900	774	860	801		620	15149	25001	6033	24823	91531	24416	22811	32705
625	16580	774	20895	1015	804	806	821	794		625	17086	29313	5812	24965	112357	17878	17990	33347
630	17212	991	27124	833	959	965	674	759		630	13596	28831	5211	21560	114539	19225	15443	30794
635	14735	749	41378	968	851	846	819	970		635	21074	29631	4829	17141	115110	16484	21663	34957
640	19289	1009	24974	982	886	790	602	742		640	14387	20083	5966	17424	103882	19639	22283	30588
645	14903	918	20937	832	777	744	724	677		645	18171	26181	5129	23479	123378	14309	16050	31249
650	15750	980	26905	934	962	807	777	818		650	26539	21246	5647	18326	116576	19141	18984	32634
655	15644	1002	29394	808	823	621	863	861		655	14903	23373	5069	19154	120179	16415	14763	27181
660	15627	843	34062	869	870	883	887	757		660	19554	19232	4949	22968	99275	13347	17646	31658
665	14157	888	30160	1017	970	709	820	658		665	17012	16541	4769	19271	108250	15446	17173	26334
670	18462	907	46887	1022	902	823	813	846		670	16826	22043	4668	17300	103573	17192	16527	27903
675	20397	967	27453	1170	942	758	791	769		675	13482	17503	3869	20321	106444	14569	14379	33111
680	20141	1118	38249	1122	933	704	861	821		680	15356	20701	3841	19339	114314	14030	18268	25937
685	22340	952	43541	1213	1023	806	852	696		685	15570	19016	3164	16609	98969	15221	15339	26182
690	16604	1338	35196	1693	1119	769	833	989		690	15134	19024	3484	18977	125179	16221	14012	27212
695	20677	1144	43415	1648	1187	757	765	642		695	13344	23119	3763	17856	96850	12081	12841	24497
700	20971	1388	47790	1733	1063	929	866	795		700	13715	19567	3377	17579	90734	19108	19124	30143
705	21111	1310	67912	2014	1148	782	677	716
710	25480	1319	59430	2044	1293	778	907	838
715	27424	1410	43028	2763	1523	791	699	864
720	20561	1549	66861	2904	1535	726	816	743
725	20944	1845	62659	3036	2011	874	829	772
730	22963	2077	49657	3635	1842	806	737	771
735	20136	2293	65732	4666	1984	830	830	804
740	27475	2039	47029	6083	1898	633	720	884
745	23031	2588	74842	6022	2300	746	783	752
750	24276	2535	66350	8284	2582	849	904	716
755	23087	3231	74706	7837	2692	954	862	824
760	24484	3871	48760	8858	2919	811	778	726
765	19972	3562	74856	12167	3627	799	951	794
770	25182	3355	102095	11451	4563	778	700	747
775	24592	3072	73147	15799	4236	710	790	738
780	24187	4084	83564	14133	5178	886	829	866
785	30002	3031	86536	13491	5501	782	738	808
790	27656	3840	52381	23387	6608	692	672	822
795	38765	4052	118126	23768	7748	785	840	782
800	22139	3941	75901	18028	8582	816	728	865
805	26125	5414	119152	24657	9482	832	770	742
810	33513	4800	83327	18685	13302	804	700	749
815	44710	5388	54905	22339	12082	805	752	789
820	33576	5481	92940	24350	15262	788	762	742
825	26062	5072	106127	27988	16150	785	782	840
830	28302	5353	60498	20230	19836	728	830	702
835	36095	6250	85667	31887	14858	754	823	845
840	49998	4709	111428	40227	22306	745	840	862
845	32871	6175	80989	30762	23580	770	817	819
850	33032	6810	80336	32017	25400	846	862	774
855	35423	9388	73294	35295	23131	740	768	807
860	39102	9555	95656	41561	26788	756	742	819
865	28660	6973	77707	34126	27993	677	824	812
870	31709	6753	91994	43473	29407	764	751	786
875	44897	7986	77374	38928	23721	778	793	950
880	43917	9876	111869	45664	28160	818	763	1011
885	48954	9005	111204	39829	40144	833	945	974
890	44242	9295	93113	45663	38071	887	930	765
895	61817	8994	118863	32692	41287	857	790	804
900	58430	7776	86208	49870	49622	815	830	866
905	31118	10507	96261	47648	34811	708	918	1066
910	53098	15620	108748	55900	40937	869	946	821
915	64687	11721	86880	53847	43278	888	808	854
920	80147	14337	92998	47505	45971	902	880	1013
925	43221	10634	100983	51704	39137	926	794	933
930	55225	14851	132363	55789	53167	954	1020	914
935	52806	11536	94583	51970	39183	969	838	1093
940	70713	9084	116546	57625	48844	792	1032	958
945	98233	16952	108705	62574	53534	924	713	1017
950	95284	10966	117981	53980	53667	1002	834	1367
955	57524	13120	121983	69106	57532	1098	818	1260
960	97866	15831	149256	74436	53888	1134	912	1203
965	104187	11314	172589	62411	51711	1256	1147	1539
970	62499	12793	114949	63811	61259	1127	761	1594
975	70059	16575	166761	71085	61858	1273	982	1633
980	111230	18968	122385	65731	73112	1446	974	1635
985	58934	14420	125027	66156	69667	1697	1115	1742
990	79150	11315	125112	73401	72182	1573	1164	1991
995	91489	17716	139183	76021	75085	1877	1374	2411
1000	175013	12952	132216	75266	76887	1641	1421	1715
1005	137060	22681	117021	78383	83468	1836	1304	2618
1010	154354	14172	143458	77644	90430	2147	1408	2286
1015	61168	34958	146916	76913	83708	2113	1267	2631
1020	142425	15252	126852	75635	80686	2285	1545	2686
1025	146694	16736	128930	78819	79162	2741	1742	2769
1030	140916	17341	138624	74808	83557	2380	1867	2449
1035	127425	14004	132023	79402	95502	3103	2069	4230
1040	92481	19943	164497	78262	92911	3435	2180	3386
1045	71825	10002	133609	79432	104662	3583	2218	4205
1050	53700	15514	133394	81696	101129	3577	2791	3456
1055	134491	21267	154376	79091	101296	4052	3005	4606
1060	74131	23302	155480	88534	113986	4290	4012	5000
1065	125248	16114	145508	91389	114379	5020	3741	4494
1070	109835	31690	165217	87545	111697	5090	4218	5202
1075	128190	27461	165700	80333	101108	4785	4533	5459
1080	152587	23644	174320	79075	104510	5579	4441	6187
1085	106657	26523	131688	69906	120411	5552	5845	7411
1090	140042	17051	167653	90759	101273	5660	5297	6075
1095	160074	22638	131795	85750	110974	8076	8991	8087
1100	156551	23711	149943	78696	112076	8397	7008	7731
1105	169119	28603	170132	78983	106862	8532	10268	9093
1110	136076	31612	174413	76833	106610	7431	9626	6401
1115	164376	36419	153946	83453	103180	7498	11018	8509
1120	120534	20581	175186	76091	119582	10742	12697	8671
1125	162388	29496	158928	79325	107486	9680	13851	10198
1130	145188	35661	165160	91727	112589	11148	10663	11750
1135	122815	22496	171679	77428	111104	11401	15468	11307
1140	111304	38204	172182	88223	114296	12227	13305	13571
1145	110299	25506	147036	86594	109612	13683	12587	16995
1150	167467	42360	185118	92313	134177	11829	13074	11153
1155	199801	53561	174898	83097	118461	11785	18607	13960
1160	145425	36755	154144	77622	105550	18869	16934	12583
1165	184324	43643	146246	88992	109943	14142	21919	23196
1170	183503	36714	185380	97829	115635	20140	28583	14179
1175	208706	52364	170992	84828	114960	18336	22074	18140
1180	206466	69836	176363	88440	125500	15637	21768	16286
1185	202843	63117	197427	82567	110094	17223	21551	19215
1190	191029	52975	223728	94662	111510	25363	25730	19996
1195	191702	63283	179766	94301	113628	20466	29820	18677
1200	145732	41840	167545	73550	118196	16053	25124	20119
1205	187111	43500	194620	87500	102240	17781	36327	28613
1210	193326	44253	192307	75131	108029	22723	31224	20193
1215	221192	51985	200783	85223	118366	22191	39679	20643
1220	228575	54969	217289	86941	119535	25352	42712	19672
1225	152737	46356	207862	88512	130368	29020	46474	22217
1230	212909	56520	190222	78256	116502	33365	39269	26684
1235	198114	50648	214444	92810	113975	24932	56657	29768
1240	149531	58616	197553	82754	110521	26621	50589	24679
1245	113646	70015	209003	90769	122609	31488	57491	22055
1250	157706	92390	211222	85698	109481	30334	51735	26650
1255	223141	65828	232087	88321	114447	38901	49878	38593
1260	247532	68094	233387	77126	108270	46205	71098	34324
1265	149068	61716	198944	82867	120588	25829	61483	36249
1270	225934	75064	193385	92189	122156	37439	65778	33275
1275	196226	74572	195515	78278	136402	35480	79928	34199
1280	201395	75790	264056	98975	109216	51744	76792	39536
1285	161375	105730	260000	78584	116772	46617	87470	42304
1290	171175	77934	248873	94163	108544	40587	84798	28704
1295	181398	80236	210158	91568	124194	42914	79692	27011
1300	242596	89209	166348	78855	101477	41777	75592	31717
1305	246523	104684	275463	84090	149454	44785	71258	36320
1310	226183	84743	207503	108254	111744	42226	79111	34389
1315	276403	86551	245956	93738	132040	48277	83132	60927
1320	227248	83513	203410	100839	122276	43418	76133	39780
1325	205221	101814	216255	98528	116468	55243	87378	48749
1330	244629	98268	192307	94529	111272	64834	77867	54818
1335	299011	86555	222740	102620	112017	47935	82322	62008
1340	298139	107246	260000	104091	118221	42021	86073	43040
1345	196799	102852	170916	103936	117561	40048	85271	48201
1350	251722	96254	233055	95531	120499	59335	87333	51793
1355	256395	103708	207078	110009	130233	56706	82795	54299
1360	226640	105678	203728	95311	114559	58242	80630	56744
1365	250256	93668	208180	95106	106520	65261	75735	74696
1370	272324	99895	189929	110089	110110	66805	86518	64400
1375	202622	94346	242278	88817	114855	52141	81981	61642
1380	217016	102312	187592	88182	136349	71617	86877	84982
1385	276956	111461	236305	98518	125230	69266	95169	72292
1390	255676	104812	182345	89040	118556	66193	77105	82436
1395	225243	82355	213158	97150	140846	50157	81365	64251
1400	231465	91491	190703	90635	133104	55816	87651	98610
1405	210476	84497	194657	96426	130132	58710	95412	81409
1410	194816	87423	234466	87454	130659	60184	91403	132462
1415	228409	90655	159606	98460	126399	56272	88217	100062
1420	228755	99058	216891	103838	128030	54062	98240	92479
1425	233484	91403	224801	91548	115527	58792	95162	131419
1430	258304	75322	215933	96372	134527	72328	86952	92506
1435	273043	89124	191408	96065	130734	59060	91223	104657
1440	181948	80061	231603	96812	108740	69810	89649	106594
1445	227165	87501	200589	103890	112987	69862	102236	104314
1450	268439	80260	182517	93387	121828	67255	90295	129086
1455	257571	83182	201765	107900	106335	65783	100414	130272
1460	316474	81794	154407	88861	131088	92848	91775	120872
1465	207475	84531	188173	86216	120373	80162	76864	115272
1470	156279	82501	181585	95747	126258	57449	83792	88350
1475	275200	105606	207741	82939	122372	84975	100151	115618
1480	315465	104385	199621	85195	127274	84549	80809	126071
1485	239651	119103	197443	93888	119306	95462	89807	128530
1490	254072	121302	174290	100683	111849	104871	94864	106585
1495	207641	100089	218855	89515	129783	91158	106799	104096
1500	305731	91498	208277	104259	141954	95000	98123	100827
1505	217666	96297	213906	88625	118704	84876	80348	127775
1510	238282	79798	177450	93256	121521	86475	87010	112085
1515	245666	81322	216601	104778	126987	92807	84589	129617
1520	262341	87646	172465	96845	120402	81475	84270	115748
1525	258649	88469	181466	86088	156280	79033	94770	117880
1530	215910	93996	197257	95015	119771	85878	88823	116121
1535	247435	88148	197769	92104	122613	76507	90798	92615
1540	231700	82153	213089	93746	139224	84739	84124	123624
1545	285253	83711	182048	80941	128135	108073	70605	119805
1550	235945	85025	192348	88767	113792	97550	92642	96700
1555	278878	78197	155314	100695	124741	79402	80051	97982
1560	278339	81249	214430	92885	119862	88395	86287	117276
1565	293051	83579	221385	90531	122260	86852	90283	114150
1570	270983	78519	200557	89792	118786	83104	88895	106263
1575	245721	85222	201947	95886	137254	117905	79939	137133
1580	258027	83763	169381	104714	118811	93787	89773	121989
1585	270209	84327	185739	86245	122825	87865	87187	126178
1590	213822	95079	170038	87725	130411	106524	98885	118374
1595	210241	81466	260000	113601	150543	94951	76386	111590
1600	250519	79889	195120	99274	137913	90240	90645	129006
1605	290949	95650	216076	102598	126620	111153	76951	111726
1610	251514	87568	185808	100559	119846	109354	81284	110802
1615	258525	82826	173336	87929	135775	93994	96007	121668
1620	235212	75529	189458	108075	124349	111774	100248	132773
1625	254238	95511	209522	102324	114819	99335	85745	109584
1630	239416	93275	173283	94897	124841	106267	95719	109438
1635	257073	81646	217652	95190	141997	106537	93228	127265
1640	283994	82030	219615	92846	140778	104128	90739	109154
1645	262189	82095	213435	96179	119069	114807	87070	111575
1650	240978	71623	169492	95084	125872	88315	87835	120686
1655	224040	83261	195318	84530	121380	100863	96381	95466
1660	245444	95932	188242	94991	116844	110788	93123	125544
1665	272062	84504	222754	97486	123118	101336	96145	130729
1670	266047	81476	197105	123330	122357	103206	94438	103829
1675	206009	90994	175138	93984	123237	90665	98340	104441
1680	239388	71183	156289	88375	140622	109722	88666	112425
1685	236194	81382	168569	105120	121053	87878	94349	118565
1690	247933	85017	148856	97565	122276	94419	83226	101244
1695	274661	95260	212010	92900	126073	104389	85261	109441
1700	294088	83943	199829	103048	131100	113787	111251	90929
1705	300172	85156	133333	93028	147600	114745	99630	118393
1710	236678	76500	218357	90792	128319	106206	83497	98038
1715	270637	86416	204129	85043	123125	101416	103174	88438
1720	278270	93462	163531	103606	133574	106886	80305	96796
1725	333219	89806	162285	78665	146552	109035	91985	98285
1730	315686	78455	179502	91693	129267	104166	93072	106994
1735	324300	88308	260000	100661	129595	117174	110645	114840
1740	332113	97481	221662	81688	134514	113564	86875	101920
1745	298056	73880	176195	88217	118023	103634	81310	99355
1750	275228	80569	170430	92868	149918	139898	95662	115355
1755	309353	89987	182462	100413	147415	98483	94573	103929
1760	213227	91152	180056	94808	133651	115212	90111	113414
1765	323540	81896	188850	96646	115810	96275	93929	115098
1770	268066	81798	205526	92907	141876	118277	87103	112933
1775	221413	84046	139504	93618	130919	103087	86379	93790
1780	239457	85754	184035	93384	126672	98655	101650	100706
1785	246274	87461	202193	109266	136928	99581	80342	126488
1790	269116	88757	223929	89892	123933	85392	80936	101802
1795	256879	87254	158984	91113	137016	104612	100761	118220
1800	326291	81586	227839	86794	128020	96313	69583	99275
